# Supplementary material for: Benzobischalcogeno[3,2-c]quinolines: tuning electronic and structural properties with group 16 elements
Source: Royal Society of Chemistry journal article supplement (doi:10.1039/d4qo01921k), 2024-11-29
Supplement: d4qo01921k1.pdf [file d4qo01921k1.pdf]

## Supporting Information

### **Benzobischalcogeno[3,2-*c*]quinolines: Tuning Electronic and Structural Properties with Group 16 Elements**

Christopher Hüßler,<sup>a</sup> Martin C. Dietl,<sup>‡a</sup> Matthias Scherr,<sup>‡a</sup> Emma Butigan,<sup>a</sup> Robin Heckershoff,<sup>a</sup> Eric F. Lopes,<sup>a</sup> Justin Kahle,<sup>a</sup> Petra Krämer,<sup>a</sup> Frank Rominger,<sup>a</sup> Matthias Rudolph,<sup>a</sup> and A. Stephen K. Hashmi<sup>\*a,b</sup>

[a] Organisch-Chemisches Institut (OCI), Heidelberg University, Im Neuenheimer Feld 270, 69120 Heidelberg, Germany. E-mail: [hashmi@hashmi.de](mailto:hashmi@hashmi.de)

[b] Chemistry Department, Faculty of Science, King Abdulaziz University, Jeddah 21589, Saudi Arabia

[‡] These authors contributed equally to this work.

### **Table of Contents**

|     |                                                                               |     |
|-----|-------------------------------------------------------------------------------|-----|
| 1   | Experimental Procedures .....                                                 | 2   |
| 1.1 | General Information .....                                                     | 2   |
| 1.2 | General Procedures.....                                                       | 4   |
| 1.3 | Synthesis of Compounds .....                                                  | 7   |
| 2   | NMR Spectra .....                                                             | 47  |
| 3   | UV-Vis and Fluorescence Spectra .....                                         | 94  |
| 4   | Thermogravimetric Analysis / Differential Scanning Calorimetry (TGA/DSC)..... | 112 |
| 5   | Crystallographic Data .....                                                   | 114 |
| 6   | Computational Investigation .....                                             | 128 |
| 6.1 | Computational Details .....                                                   | 128 |
| 6.2 | Overview of the Computed Molecules.....                                       | 128 |
| 6.3 | Coordinates of the Optimized Geometries .....                                 | 129 |
| 6.4 | Visualization of the Frontier Molecular Orbitals .....                        | 237 |
| 7   | References.....                                                               | 243 |

# 1 Experimental Procedures

## 1.1 General Information

**Chemicals** were bought from commercial suppliers (abcr, Acros, Alfa Aesar, BLDPharm, Carbolution, Chempur, Fluka, Merck, Sigma Aldrich and TCI) and used as delivered. Anhydrous solvents were dispensed from a solvent purification system MB SPS-800. Solvents were degassed by freeze-pump-thaw technique. Deuterated solvents were bought from Eurisotop and Sigma Aldrich.

**Melting points (mp)** were measured in open glass capillaries on a Stuart SMP10 melting point apparatus and are uncorrected.

**R<sub>f</sub>-values** were determined by analytical thin layer chromatography (TLC) on aluminium sheets coated with silica gel produced by Macherey-Nagel (ALUGRAM® Xtra SIL G/25 UV<sub>254</sub>). Detections was accomplished using UV-light (254 and 365 nm) or a TLC staining solution (vanillin and ninhydrine).

**Nuclear magnetic resonance (NMR)** spectra were, if not mentioned otherwise, recorded at room temperature at the organic chemistry department of Heidelberg University under the supervision of Dr. J. Graf on the following spectrometers: Bruker Avance III 300 (300 MHz), Bruker Avance DRX 300 (300 MHz), Bruker Fourier 300 (300 MHz), Bruker Avance III 400 (400 MHz), Bruker Avance III 500 (500 MHz), Bruker Avance III 600 (600 MHz), Bruker Avance NEO 700 (700 MHz). Chemical shifts  $\delta$  are given in ppm and coupling constants  $J$  in Hz. Spectra were referenced to residual solvent protons according to Fulmer *et al.*<sup>1</sup> The following abbreviations were used to describe the observed multiplicities: for <sup>1</sup>H NMR spectra: s = singlet, d = doublet, t = triplet, q = quartet, qui = quintet, sext = sextet, sept = septet, m = multiplet, dd = doublet of doublets, td = triplet of doublets, dt = doublet of triplets, br = broad signal; for <sup>13</sup>C {<sup>1</sup>H} NMR spectra: s = quaternary carbon, d = CH carbon, t = CH<sub>2</sub> carbon and q = CH<sub>3</sub> carbon. <sup>13</sup>C {<sup>1</sup>H} NMR spectra are proton decoupled and interpreted with help of DEPT- and 2D spectra. All spectra were integrated and processed using MestreNova software.

**High-resolution mass spectra (HR-MS)** were recorded at the chemistry department of Heidelberg University under the supervision of Dr. J. Gross on the following spectrometers: JEOL AccuTOF GCx (EI), Bruker ApexQe hybrid 9.4 T FT-ICR (ESI, MALDI, DART), Finnigan LCQ (ESI), Bruker AutoFlex Speed (MALDI) and Bruker timsTOFfleX (ESI, MALDI).

**Infrared spectra** were recorded from a neat powder or oil on a FT-IR spectrometer (Bruker LUMOS) with a Germanium ATR-crystal. For the most significant bands the wave numbers are given.

**UV-Vis spectra** were recorded on a Jasco UV-Vis V-660. Fluorescence spectra were recorded on a Jasco FP6500. Quantum yields (QY) were recorded on a PTI QuantaMaster 40 with Ulbricht Sphere.

**Thermogravimetric Analysis (TGA) / Differential Scanning Calorimetry (DSC)** was carried out under nitrogen atmosphere using a Mettler Toledo TGA/DSC 1 device in an aluminium crucible with a heating rate of 10 K min<sup>-1</sup>. The data was visualized with OriginPro 2023.

**X-ray crystallography** was carried out at the chemistry department of Heidelberg University under the supervision of Dr. F. Rominger on the following instruments: Bruker Smart APEX II Quazar (with Mo-microsource) and Stoe Stradivari (with Co-microsource and Pilatus detector). The structures were processed with Mercury 4.3.0.

For **flash column chromatography** silica gel (Sigma-Aldrich, pore size 60 Å, 70-230 mesh, 63-200 µm) or aluminium oxide (Honeywell, pore size 60 Å, activated, neutral) was used as stationary phase. As eluents different mixtures of petroleum ether (PE), ethyl acetate (EA) or dichloromethane (DCM) were used.

## 1.2 General Procedures

### General Procedure 1 (GP1): Iodination of 4-alkylanilines

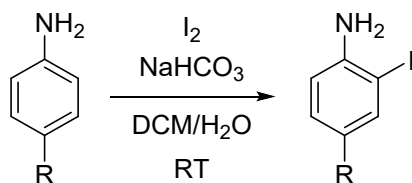

According to a slightly modified procedure of Flynn *et al.*,<sup>2</sup> 4-alkylaniline (1.00 eq.), iodine (1.00 eq.) and NaHCO<sub>3</sub> (1.20 eq.) were added to a mixture of DCM (25 ml) and H<sub>2</sub>O (25 ml) in the dark. After stirring at rt over night, the reaction was quenched with a sat. solution of sodium sulfite (50 ml). The organic layer was extracted three times with DCM. The combined organic layer was then dried with Na<sub>2</sub>SO<sub>4</sub>, filtered and the solvent was removed *in vacuo* to obtain 4-alkyl-2-iodoanilines.

### General Procedure 2 (GP2): Sonogashira cross coupling

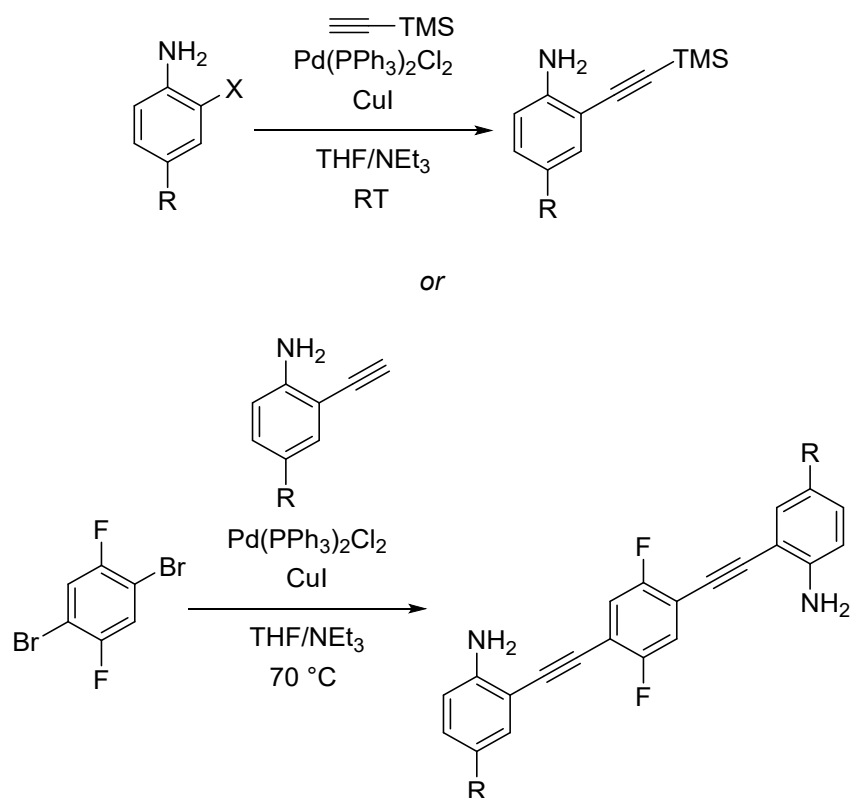

In a heat gun-dried Schlenk flask under an atmosphere of nitrogen, aryl halide (1.00 eq.), Pd(PPh<sub>3</sub>)<sub>2</sub>Cl<sub>2</sub> (2-5 mol %) and CuI (2-5 mol %) were dissolved in a degassed mixture of THF (20 ml) and triethylamine (20 ml). After stirring for 5 min, the corresponding alkyne (1.10-2.10 eq.) was added. The mixture was stirred at RT/70 °C overnight. The reaction was cooled and solvents were removed under reduced pressure. The crude product was purified by flash column chromatography.

### General Procedure 3 (GP3): Nucleophilic hydrothiolation

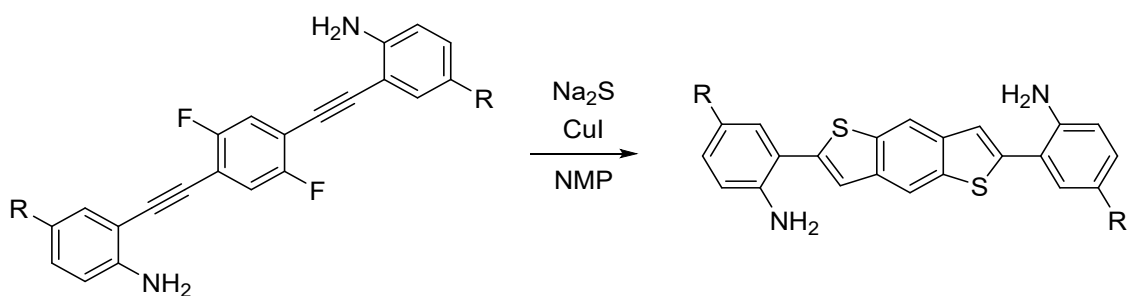

In a crimp vial, 2,2'-((2,5-difluoro-1,4-phenylene)bis(ethyne-2,1-diyl))dianiline (1.00 eq.), Na<sub>2</sub>S (6.00 eq.) and CuI (5 mol %) were dissolved in *N*-methyl-2-pyrrolidone (10 ml). The mixture was stirred at 180 °C overnight. After cooling, EA and a sat. solution of NH<sub>4</sub>Cl was added and the organic layer was washed three times with water. The combined organic layer was then dried with Na<sub>2</sub>SO<sub>4</sub>, filtered and the product was precipitated with methanol to obtain 2,2'-(benzo[1,2-*b*:4,5-*b'*]dithiophene-2,6-diyl)dianilines.

#### General Procedure 4 (GP4): Nucleophilic hydroselenation/hydrotelluration

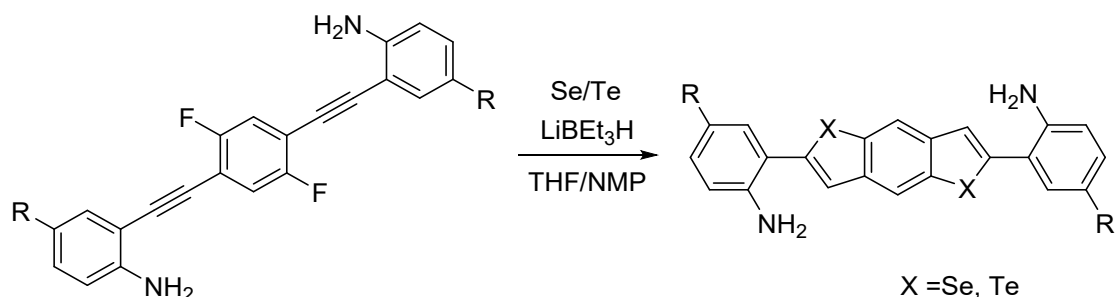

In a heat gun-dried Schlenk flask under an atmosphere of nitrogen, selenium or tellurium (2.20 eq.) was suspended in dry THF (10 ml) and LiBEt<sub>3</sub>H (2.50 eq., 1 M in THF) was added dropwise. The solution was stirred for 15 min. Afterwards, 2,2'-((2,5-difluoro-1,4-phenylene)bis(ethyne-2,1-diyl))dianiline (1.00 eq.) and degassed NMP (10 ml) were added. The THF was driven out at 180 °C and the mixture was stirred at 180 °C overnight. After cooling, EA and a sat. solution of NH<sub>4</sub>Cl was added and the organic layer was washed three times with water. The combined organic layer was then dried with Na<sub>2</sub>SO<sub>4</sub>, filtered and the product was precipitated with PE or filtered over a silica plug (DCM) to obtain 2,2'-(benzo[1,2-*b*:4,5-*b'*]diseleno(/telluro)phene-2,6-diyl)dianilines.



### General Procedure 5 (GP5): Pictet-Spengler reaction

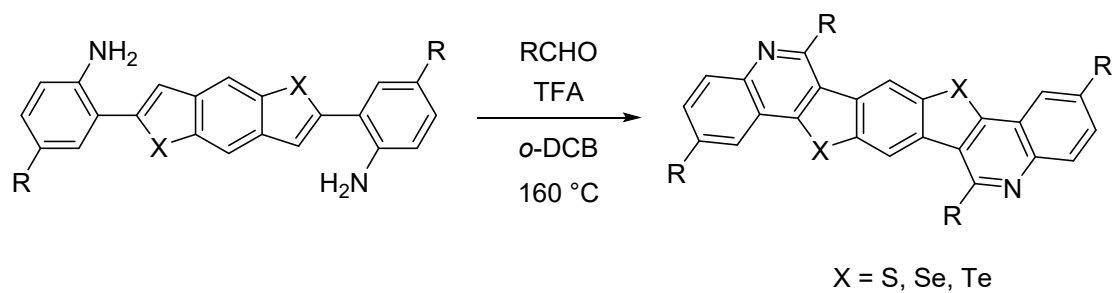

In a 4 ml screw-capped vial, 2,2'-(benzo[1,2-*b*:4,5-*b'*]dichalcogenophene-2,6-diyl)dianiline (1.00 eq.), the corresponding aldehyde (3.00 eq.) and TFA (0.10 eq.) were dissolved in *ortho*-dichlorobenzene (1 ml). The mixture was stirred at 160 °C overnight. Pentane (2 ml) was added and the mixture was cooled to 0 °C for 1 h. The precipitate was filtered off and washed with Et<sub>2</sub>O and pentane to yield the benzobischalcogenopheno[3,2-*c*]quinoline derivative.

## 1.3 Synthesis of Compounds

### 3,5-Diphenylbenzaldehyde (S1)

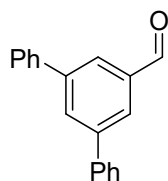

In a heatgun-dried Schlenk-flask under an atmosphere of nitrogen, 3,5-dibromobenzaldehyde (1.00 g, 3.79 mmol, 1.00 eq.), phenylboronic acid (1.85 g, 15.2 mmol, 4.00 eq.), Pd(OAc)<sub>2</sub> (85.1 mg, 379 μmol, 0.10 eq.), PPh<sub>3</sub> (398 mg, 1.52 μmol, 0.40 eq.) and Na<sub>2</sub>CO<sub>3</sub> (1.20 g, 11.4 mmol, 3.00 eq.) were dissolved in a 1:1 mixture of degassed toluene/water (50 ml) and heated to 100 °C overnight. The reaction was cooled and water was added. The mixture was extracted with EA three times. The organic phase was dried with Na<sub>2</sub>SO<sub>4</sub>. Purification by flash column chromatography (silica gel, PE/EA 10:1) yielded a colorless solid (910 mg, 3.52 mmol, 93%).

<sup>1</sup>H NMR (300 MHz, CDCl<sub>3</sub>): δ = 10.16 (s, 1H), 8.08 (m, 3H), 7.71-7.67 (m, 4H), 7.53-7.48 (m, 4H), 7.45-7.40 (m, 2H) ppm.

The spectroscopic data correspond to those previously reported in the literature.<sup>3</sup>

### 4-Hexylbenzaldehyde (S2)

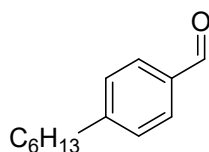

Hexylbenzene (10.0 g, 61.6 mmol, 1.00 eq.) was dissolved in trifluoroacetic acid (70 ml). Hexamethylenetetramine (9.50 g, 67.8 mmol, 1.10 eq.) was added and the mixture was stirred at 80 °C. After cooling, a sat. solution of NaHCO<sub>3</sub> was slowly added, the mixture was extracted with Et<sub>2</sub>O three times, and the combined organic phase was dried with Na<sub>2</sub>SO<sub>4</sub>. Purification by flash column chromatography (silica gel, PE/EA 100:1 → 5:1) yielded a colorless liquid (6.70 g, 35.2 mmol, 57%).

<sup>1</sup>H NMR (300 MHz, CDCl<sub>3</sub>): δ = 9.97 (s, 1H), 7.80 (d, J = 8.1 Hz, 2H), 7.34 (d, J = 8.0 Hz, 2H), 2.71-2.66 (m, 2H), 1.67-1.59 (m, 2H), 1.36-1.26 (m, 6H), 0.90-0.86 (m, 3H) ppm.

The spectroscopic data correspond to those previously reported in the literature.<sup>4</sup>

### 2-Iodo-4-*tert*-butylaniline (2a)

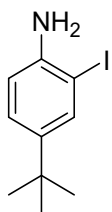

The reaction was carried out according to **GP1** with 4-*tert*-butylaniline (6.00 g, 40.2 mmol, 1.00 eq.), iodine (10.2 g, 40.2 mmol, 1.00 eq.) and NaHCO<sub>3</sub> (4.05 g, 48.3 mmol, 1.20 eq.) to obtain a dark brown liquid (11.0 g, 40.0 mmol, 99%).

<sup>1</sup>H NMR (300 MHz, CDCl<sub>3</sub>):  $\delta$  = 7.62 (d, J = 2.2 Hz, 1H), 7.17 (dd, J = 8.4, 2.2 Hz, 1H), 6.70 (d, J = 8.4 Hz, 1H), 3.96 (s, 2H), 1.26 (s, 9H) ppm.

The spectroscopic data correspond to those previously reported in the literature.<sup>5</sup>

### 2-Iodo-4-hexylaniline (2b)

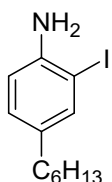

The reaction was carried out according to **GP1** with 4-hexylaniline (4.00 g, 22.6 mmol, 1.00 eq.), iodine (5.73 g, 22.6 mmol, 1.00 eq.) and NaHCO<sub>3</sub> (2.27 g, 27.1 mmol, 1.20 eq.) to obtain a dark brown liquid (6.80 g, 22.4 mmol, 99%).

<sup>1</sup>H NMR (300 MHz, CDCl<sub>3</sub>):  $\delta$  = 7.46 (d, J = 1.9 Hz, 1H), 6.95 (dd, J = 8.1, 2.0 Hz, 1H), 6.68 (d, J = 8.1 Hz, 1H), 3.94 (s, 2H), 2.52 – 2.39 (m, 2H), 1.52 (td, J = 8.1, 4.4 Hz, 2H), 1.38 – 1.20 (m, 6H), 0.93 – 0.83 (m, 3H) ppm.

The spectroscopic data correspond to those previously reported in the literature.<sup>2</sup>

### 2-Ethynylaniline (3a)

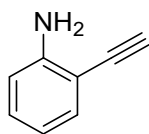

The reaction was carried out according to **GP2** with 2-iodoaniline (10.0 g, 45.7 mmol, 1.00 eq.), Pd(PPh<sub>3</sub>)<sub>2</sub>Cl<sub>2</sub> (160 mg, 228 μmol, 0.01 eq.), CuI (43.5 mg, 228 μmol, 0.01 eq.) and trimethylsilylacetylene (4.93 g, 50.2 mmol, 1.10 eq.) at rt. The mixture was filtered through Celite® with EA, the solvent was removed under reduced pressure and the residue was dissolved in MeOH (100 ml). K<sub>2</sub>CO<sub>3</sub> (15.8 g, 114 mmol, 2.50 eq.) was added and the resulting mixture was stirred at rt overnight. Water was added and the mixture was extracted with DCM three times. The solvent was removed under reduced pressure. Purification by flash column chromatography (silica gel, PE/EA 20:1 → 5:1) yielded a light brown oil (4.49 g, 38.3 mmol, 84%).

<sup>1</sup>H NMR (300 MHz, CDCl<sub>3</sub>): δ = 7.32 (dd, J = 7.7, 1.6 Hz, 1H), 7.14 (ddd, J = 8.7, 7.4, 1.6 Hz, 1H), 6.79 – 6.61 (m, 2H), 4.25 (s, 2H), 3.38 (s, 1H) ppm.

The spectroscopic data correspond to those previously reported in the literature.<sup>6</sup>

### 2-Ethynyl-4-*tert*-butylaniline (3b)

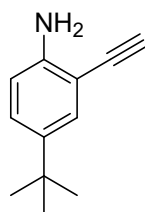

The reaction was carried out according to **GP2** with 2-iodo-4-*tert*-butylaniline **2a** (4.00 g, 14.5 mmol, 1.00 eq.), Pd(PPh<sub>3</sub>)<sub>2</sub>Cl<sub>2</sub> (204 mg, 291 μmol, 0.02 eq.), CuI (55.4 mg, 291 μmol, 0.02 eq.) and trimethylsilylacetylene (1.71 g, 17.5 mmol, 1.20 eq.) at rt. The mixture was filtered through Celite® with EA, the solvent was removed under reduced pressure and the residue was dissolved in MeOH (100 ml). K<sub>2</sub>CO<sub>3</sub> (5.03 g, 36.4 mmol, 2.50 eq.) was added and the resulting mixture was stirred at rt overnight. Water was added and the mixture was extracted with DCM three times. The solvent was removed under reduced pressure. Purification by flash column chromatography (silica gel, PE/EA 20:1) yielded a light brown oil (1.87 g, 10.8 mmol, 74%).

<sup>1</sup>H NMR (300 MHz, CDCl<sub>3</sub>): δ = 7.34 (d, J = 2.3 Hz, 1H), 7.19 (dd, J = 8.5, 2.4 Hz, 1H), 6.66 (d, J = 8.5 Hz, 1H), 4.13 (s, 2H), 3.36 (s, 1H), 1.26 (s, 9H) ppm.

The spectroscopic data correspond to those previously reported in the literature.<sup>7</sup>

### 2-Ethynyl-4-hexylaniline (**3c**)

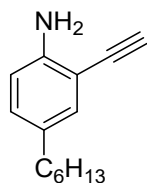

The reaction was carried out according to **GP2** with 2-iodo-4-hexylaniline **2b** (3.60 g, 11.9 mmol, 1.00 eq.), Pd(PPh<sub>3</sub>)<sub>2</sub>Cl<sub>2</sub> (167 mg, 237 μmol, 0.02 eq.), CuI (45.2 mg, 237 μmol, 0.02 eq.) and trimethylsilylacetylene (1.40 g, 14.3 mmol, 1.20 eq.) at rt. The mixture was filtered through Celite® with EA, the solvent was removed under reduced pressure and the residue was dissolved in MeOH (100 ml). K<sub>2</sub>CO<sub>3</sub> (4.11 g, 29.7 mmol, 2.50 eq.) was added and the resulting mixture was stirred at rt overnight. Water was added and the mixture was extracted with DCM three times. The solvent was removed under reduced pressure. Purification by flash column chromatography (silica gel, PE/EA 20:1) yielded a light brown oil (1.83 g, 9.09 mmol, 77%).

**R<sub>f</sub>**: 0.36 (silica gel, PE/EA = 10:1).

**<sup>1</sup>H NMR** (400 MHz, CDCl<sub>3</sub>): δ = 7.15 (d, J = 2.1 Hz, 1H), 6.97 (dd, J = 8.3, 2.1 Hz, 1H), 6.63 (d, J = 8.2 Hz, 1H), 4.12 (s, 2H), 3.36 (s, 1H), 2.52 – 2.40 (m, 2H), 1.61 – 1.49 (m, 2H), 1.38 – 1.23 (m, 6H), 0.95 – 0.83 (m, 3H) ppm.

**<sup>13</sup>C{<sup>1</sup>H} NMR** (101 MHz, CDCl<sub>3</sub>): δ = 146.52 (s), 132.51 (s), 132.22 (d), 130.53 (d), 114.61 (d), 106.71 (s), 82.16 (d), 81.09 (s), 34.93 (t), 31.86 (t), 31.66 (t), 28.98 (t), 22.74 (t), 14.22 (q) ppm.

**HR-MS** (EI<sup>+</sup>): *m/z* calculated for [C<sub>14</sub>H<sub>19</sub>N]<sup>+</sup>, [M]<sup>+</sup>: 201.15120, found: 201.15423.

**IR** (ATR): ν [cm<sup>-1</sup>] = 3473, 3380, 3304, 3022, 2955, 2925, 2854, 2096, 1739, 1620, 1500, 1465, 1421, 1377, 1307, 1262, 1156, 895, 820, 658, 621.

## 2,2'-(2,5-Difluoro-1,4-phenylene)bis(ethyne-2,1-diyl)dianiline (**5a**)

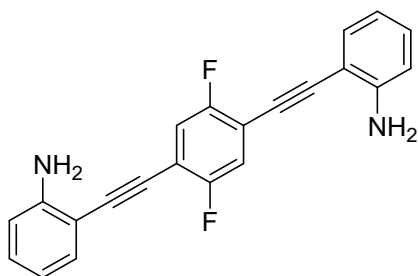

The reaction was carried out according to **GP2** with 1,4-dibromo-2,5-difluorobenzene (5.00 g, 18.4 mmol, 1.00 eq.), Pd(PPh<sub>3</sub>)<sub>2</sub>Cl<sub>2</sub> (516 mg, 736 μmol, 0.04 eq.), CuI (140 mg, 736 μmol, 0.04 eq.) and 2-ethynylaniline **3a** (4.52 g, 38.6 mmol, 2.10 eq.) at 70 °C. The reaction was cooled and solvents were removed under reduced pressure. Purification by flash column chromatography (silica gel, PE/EA 10:1 → 5:1 → EA) yielded a light brown solid (4.82 g, 14.0 mmol, 76%).

**Mp:** 186-188 °C.

**R<sub>f</sub>:** 0.20 (silica gel, PE/EA = 5:1).

**<sup>1</sup>H NMR** (700 MHz, CDCl<sub>3</sub>): δ = 7.37-7.36 (dd, J = 7.7 Hz, 2H), 7.23 (t, J = 7.3 Hz, 2H), 7.18 (td, J = 7.9 Hz, 2H), 6.74-6.71 (m, 4H), 4.35 (s, 4H) ppm.

**<sup>13</sup>C{<sup>1</sup>H} NMR** (151 MHz, CDCl<sub>3</sub>): δ = 158.82 (s), 157.41 (s), 148.44 (s), 132.25 (d), 130.82 (d), 118.75 (d), 118.09 (d), 114.56 (d), 113.17 (s), 106.82 (s), 94.29 (s), 87.30 (s) ppm.

**<sup>19</sup>F{<sup>1</sup>H} NMR** (282 MHz, CDCl<sub>3</sub>): δ = -116.17 ppm.

**HR-MS** (EI<sup>+</sup>): *m/z* calculated for [C<sub>22</sub>H<sub>14</sub>N<sub>2</sub>F<sub>2</sub>]<sup>+</sup>, [M]<sup>+</sup>: 344.11196, found: 344.11276.

**IR** (ATR): ν [cm<sup>-1</sup>] = 3479, 3383, 3070, 3034, 2208, 1938, 1698, 1611, 1565, 1507, 1485, 1455, 1416, 1313, 1285, 1257, 1188, 1167, 1150, 1054, 1025, 940, 881, 823, 751, 738, 634.

**UV-VIS** (DCM): λ<sub>max</sub> [nm] = 296, 318, 376.

**Fluorescence** (DCM): λ<sub>ex</sub> [nm] = 380, λ<sub>max</sub> [nm] = 450.

**Quantum yield** (DCM): Φ = 66 %.

**2,2'-((2,5-Difluoro-1,4-phenylene)bis(ethyne-2,1-diyl))bis(4-(*tert*-butyl)aniline) (5b)**

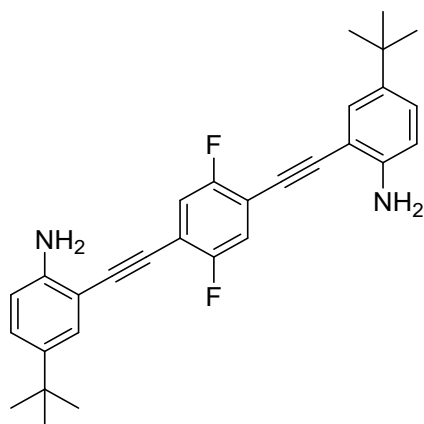

The reaction was carried out according to **GP2** with 1,4-dibromo-2,5-difluorobenzene (1.30 g, 4.78 mmol, 1.00 eq.), Pd(PPh<sub>3</sub>)<sub>2</sub>Cl<sub>2</sub> (168 mg, 239 μmol, 0.05 eq.), CuI (45.5 mg, 239 μmol, 0.05 eq.) and 2-ethynyl-4-*tert*-butylaniline **3b** (1.74 g, 10.0 mmol, 2.10 eq.) at 70 °C. The reaction was cooled and solvents were removed under reduced pressure. Purification by flash column chromatography (silica gel, PE/EE 10:1 → EA) yielded a light brown solid (1.86 g, 4.07 mmol, 85%).

**Mp:** 211-215 °C.

**R<sub>f</sub>:** 0.25 (silica gel, PE/EA = 10:1).

**<sup>1</sup>H NMR** (400 MHz, CDCl<sub>3</sub>): δ = 7.37 (d, J = 2.4 Hz, 2H), 7.26-7.21 (m, 4H), 6.69 (d, J = 8.5 Hz, 2H), 4.23 (s, 4H), 1.29 (s, 18H) ppm.

**<sup>13</sup>C{<sup>1</sup>H} NMR** (100 MHz, CDCl<sub>3</sub>): δ = 159.33 (s), 156.90 (s), 146.13 (s), 141.05 (s), 128.70 (d), 128.28 (d), 118.74 (d), 114.56 (d), 113.19 (s), 106.44 (s), 94.87 (s), 86.83 (s), 34.08 (s), 31.52 (q) ppm.

**<sup>19</sup>F{<sup>1</sup>H} NMR** (282 MHz, CDCl<sub>3</sub>): δ = -116.21 ppm.

**HR-MS** (EI<sup>+</sup>): *m/z* calculated for [C<sub>30</sub>H<sub>30</sub>N<sub>2</sub>F<sub>2</sub>]<sup>+</sup>, [M]<sup>+</sup>: 456.23716, found: 456.23676.

**IR** (ATR): ν [cm<sup>-1</sup>] = 3481, 3382, 2949, 2903, 2866, 2208, 1897, 1774, 1736, 1617, 1596, 1494, 1463, 1428, 1402, 1360, 1314, 1286, 1262, 1203, 1183, 1163, 1136, 931, 892, 878, 826, 768, 739, 694, 648, 625.

**UV-VIS** (DCM): λ<sub>max</sub> [nm] = 295, 316, 382.

**Fluorescence** (DCM): λ<sub>ex</sub> [nm] = 380, λ<sub>max</sub> [nm] = 468.

**Quantum yield** (DCM): Φ = 74 %.

## 2,2'-((2,5-Difluoro-1,4-phenylene)bis(ethyne-2,1-diyl))bis(4-hexylaniline) (**5c**)

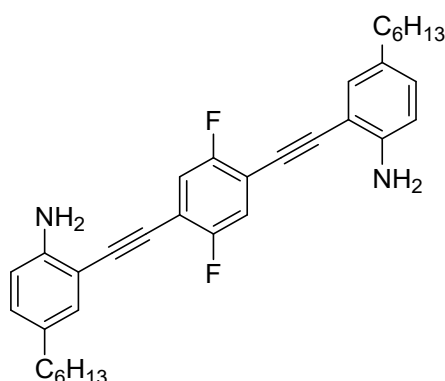

The reaction was carried out according to **GP2** with 1,4-dibromo-2,5-difluorobenzene (1.20 g, 4.41 mmol, 1.00 eq.), Pd(PPh<sub>3</sub>)<sub>2</sub>Cl<sub>2</sub> (155 mg, 221 μmol, 0.05 eq.), CuI (42.0 mg, 221 μmol, 0.05 eq.) and 2-ethynyl-4-hexylaniline **3c** (1.87 g, 9.27 mmol, 2.10 eq.) at 70 °C. The reaction was cooled and solvents were removed under reduced pressure. Purification by flash column chromatography (silica gel, PE/EA 10:1 → EA) yielded a light brown solid (1.31 g, 2.56 mmol, 58%).

**Mp:** 121-122 °C.

**R<sub>f</sub>:** 0.18 (silica gel, PE/EA = 10:1).

**<sup>1</sup>H NMR** (500 MHz, CDCl<sub>3</sub>): δ = 7.21 (t, J = 7.4 Hz, 2H), 7.18 (d, J = 2.1 Hz, 2H), 7.00 (dd, J = 8.2, 2.1 Hz, 2H), 6.67 (d, J = 8.2 Hz, 2H), 4.22 (s, 4H), 2.49 (t, J = 8.1 Hz, 4H), 1.59-1.53 (m, 4H), 1.34-1.25 (m, 12H), 0.90-0.87 (m, 6H) ppm.

**<sup>13</sup>C{<sup>1</sup>H} NMR** (151 MHz, CDCl<sub>3</sub>): δ = 159.08 (s), 146.34 (s), 132.68 (s), 131.64 (d), 131.17 (d), 118.83 (d), 114.72 (d), 106.76 (s), 94.61 (s), 87.03 (s), 34.98 (t), 31.89 (t), 31.71 (t), 29.01 (t), 22.77 (t), 14.27 (t) ppm.

**<sup>19</sup>F{<sup>1</sup>H} NMR** (282 MHz, CDCl<sub>3</sub>): δ = -116.24 ppm.

**HR-MS** (EI<sup>+</sup>): *m/z* calculated for [C<sub>34</sub>H<sub>38</sub>N<sub>2</sub>F<sub>2</sub>]<sup>+</sup>, [M]<sup>+</sup>: 512.29976, found: 512.30075.

**IR** (ATR): ν [cm<sup>-1</sup>] = 3492, 3393, 2957, 2924, 2853, 2211, 1618, 1568, 1509, 1463, 1435, 1377, 1324, 1283, 1259, 1203, 1174, 1154, 1118, 904, 871, 815, 746, 725, 694, 648, 617.

**UV-VIS** (DCM): λ<sub>max</sub> [nm] = 295, 317, 382.

**Fluorescence** (DCM): λ<sub>ex</sub> [nm] = 380, λ<sub>max</sub> [nm] = 469.

**Quantum yield** (DCM): Φ = 61 %.



**2,2'-(Benzo[1,2-*b*:4,5-*b'*]dithiophene-2,6-diyl)dianiline (6a)**

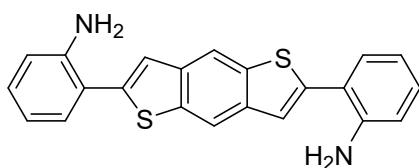

The reaction was carried out according to **GP3** with 2,2'-((2,5-difluoro-1,4-phenylene)bis(ethyne-2,1-diyl)dianiline **5a** (500 mg, 1.45 mmol, 1.00 eq.), Na<sub>2</sub>S (680 mg, 8.71 mmol, 6.00 eq.) and CuI (13.8 mg, 72.6 μmol, 0.05 eq.) to yield a brown solid (528 mg, 1.42 mmol, 98%).

**Mp:** 297-299 °C.

**<sup>1</sup>H NMR** (600 MHz, DMSO-*d*<sub>6</sub>): δ = 8.40 (s, 2H), 7.63 (s, 2H), 7.30 (d, *J* = 7.5 Hz, 2H), 7.11 (t, *J* = 7.7 Hz, 2H), 6.86 (d, *J* = 8.1 Hz, 2H), 6.68 (d, *J* = 7.3 Hz, 2H), 5.35 (s, 4H) ppm.

**<sup>13</sup>C{<sup>1</sup>H} NMR** (151 MHz, DMSO-*d*<sub>6</sub>): δ = 145.88 (s), 141.86 (s), 135.94 (s), 130.21 (d), 129.32 (d), 120.95 (d), 117.92 (s), 116.84 (d), 116.29 (d), 116.16 (d) ppm.

**HR-MS** (EI<sup>+</sup>): *m/z* calculated for [C<sub>22</sub>H<sub>16</sub>N<sub>2</sub>S<sub>2</sub>]<sup>+</sup>, [M]<sup>+</sup>: 372.07494, found: 372.07446.

**IR** (ATR): ν [cm<sup>-1</sup>] = 3450, 3359, 3030, 1925, 1898, 1614, 1570, 1548, 1487, 1457, 1442, 1387, 1310, 1265, 1236, 1219, 1171, 1140, 1064, 1030, 930, 875, 812, 744, 691, 660.

**UV-VIS** (DCM): λ<sub>max</sub> [nm] = 247, 277, 352.

**Fluorescence** (DCM): λ<sub>ex</sub> [nm] = 350, λ<sub>max</sub> [nm] = 429.

**Quantum yield** (DCM): Φ = 16 %.

**2,2'-(Benzo[1,2-*b*:4,5-*b'*]dithiophene-2,6-diyl)bis(4-(*tert*-butyl)aniline) (6b)**

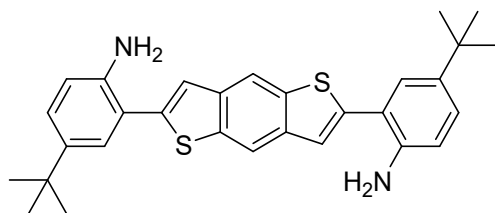

The reaction was carried out according to **GP3** with 2,2'-((2,5-difluoro-1,4-phenylene)bis(ethyne-2,1-diyl))bis(4-(*tert*-butyl)aniline) **5b** (1.80 g, 3.94 mmol, 1.00 eq.), Na<sub>2</sub>S (1.85 g, 23.7 mmol, 6.00 eq.) and CuI (37.5 mg, 197 μmol, 0.05 eq.) to yield a brown solid (1.60 g, 3.30 mmol, 84%).

**Mp:** 107-111 °C.

**R<sub>f</sub>:** 0.77 (silica gel, PE/EA = 1:1).

**<sup>1</sup>H NMR** (600 MHz, CDCl<sub>3</sub>): δ = 8.22 (s, 2H), 7.46 (s, 2H), 7.42 (d, J = 2.3 Hz, 2H), 7.25 (dd, J = 8.4, 2.3 Hz, 2H), 6.79 (d, J = 8.4 Hz, 2H), 4.08 (s, 4H), 1.34 (s, 18H) ppm.

**<sup>13</sup>C{<sup>1</sup>H} NMR** (151 MHz, CDCl<sub>3</sub>): δ = 142.71 (s), 141.88 (s), 141.76 (s), 138.25 (s), 137.32 (s), 127.84 (d), 126.88 (d), 121.54 (d), 119.56 (d), 116.30 (d), 116.22 (s), 34.15 (s), 31.63 (q) ppm.

**HR-MS** (EI<sup>+</sup>): *m/z* calculated for [C<sub>30</sub>H<sub>32</sub>N<sub>2</sub>S<sub>2</sub>]<sup>+</sup>, [M]<sup>+</sup>: 484.20014, found: 484.19885.

**IR** (ATR): ν [cm<sup>-1</sup>] = 3436, 3356, 2958, 2904, 2865, 1735, 1617, 1501, 1461, 1408, 1392, 1361, 1298, 1273, 1203, 1160, 1105, 1066, 970, 872, 820, 748, 716, 693, 659, 632.

**UV-VIS** (DCM): λ<sub>max</sub> [nm] = 246, 279, 355.

**Fluorescence** (DCM): λ<sub>ex</sub> [nm] = 355, λ<sub>max</sub> [nm] = 441.

**Quantum yield** (DCM): Φ = 16 %.

**2,2'-(Benzo[1,2-*b*:4,5-*b'*]dithiophene-2,6-diyl)bis(4-hexylaniline) (6c)**

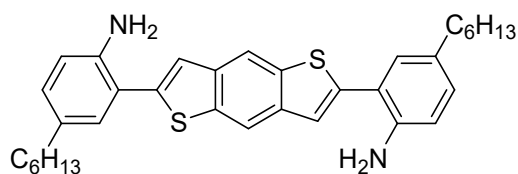

The reaction was carried out according to **GP3** with 2,2'-((2,5-difluoro-1,4-phenylene)bis(ethyne-2,1-diyl))bis(4-hexylaniline) **5c** (1.00 g, 1.95 mmol, 1.00 eq.), Na<sub>2</sub>S (913 mg, 11.7 mmol, 6.00 eq.) and CuI (18.6 mg, 97.5 μmol, 0.05 eq.) to yield a brown solid (990 mg, 1.83 mmol, 94%).

**Mp:** 158-160 °C.

**R<sub>f</sub>:** 0.74 (silica gel, PE/EA = 1:1).

**<sup>1</sup>H NMR** (700 MHz, CDCl<sub>3</sub>): δ = 8.22 (s, 2H), 7.46 (s, 2H), 7.23 (d, J = 2.0 Hz, 2H), 7.02 (dd, J = 8.2, 2.1 Hz, 2H), 6.75 (d, J = 8.2 Hz, 2H), 4.05 (s, 4H), 2.58 – 2.53 (m, 4H), 1.64 – 1.57 (m, 4H), 1.39 – 1.33 (m, 12H), 0.93 – 0.86 (m, 6H) ppm.

**<sup>13</sup>C{<sup>1</sup>H} NMR** (176 MHz, CDCl<sub>3</sub>): δ = 142.49 (s), 142.08 (s), 138.29 (s), 137.34 (s), 133.51 (s), 130.83 (d), 129.77 (d), 121.51 (d), 119.99 (s), 116.48 (d), 116.30 (d), 35.17 (t), 31.92 (t), 31.86 (t), 29.15 (t), 22.80 (t), 14.27 (q) ppm.

**HR-MS** (EI<sup>+</sup>): *m/z* calculated for [C<sub>34</sub>H<sub>40</sub>N<sub>2</sub>S<sub>2</sub>]<sup>+</sup>, [M]<sup>+</sup>: 540.26274, found: 540.26432.

**IR** (ATR): ν [cm<sup>-1</sup>] = 3442, 3406, 3356, 3328, 3012, 2953, 2922, 2851, 1618, 1543, 1497, 1468, 1455, 1423, 1377, 1307, 1263, 1235, 1175, 1153, 1114, 1068, 972, 888, 820, 793, 749, 720, 674, 651, 627.

**UV-VIS** (DCM): λ<sub>max</sub> [nm] = 245, 276, 356.

**Fluorescence** (DCM): λ<sub>ex</sub> [nm] = 355, λ<sub>max</sub> [nm] = 438.

**Quantum yield** (DCM): Φ = 17 %.

## 2,2'-(Benzo[1,2-*b*:4,5-*b'*]diselenophene-2,6-diyl)dianiline (7a)

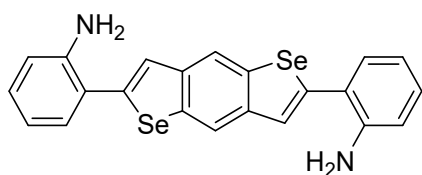

The reaction was carried out according to **GP4** with 2,2'-((2,5-difluoro-1,4-phenylene)bis(ethyne-2,1-diyl))dianiline **5a** (1.00 g, 2.90 mmol, 1.00 eq.), Se (504 mg, 6.39 mmol, 2.20 eq.) and LiBEt<sub>3</sub>H (7.26 ml, 7.26 mmol, 2.50 eq.) to yield a brown solid (750 mg, 1.61 mmol, 55%).

**Mp:** 295-297 °C.

**<sup>1</sup>H NMR** (600 MHz, DMSO-*d*<sub>6</sub>):  $\delta$  = 8.43 (s, 2H), 7.74 (s, 2H), 7.27 (dd, *J* = 7.7, 1.6 Hz, 2H), 7.09 (ddd, *J* = 8.7, 7.3, 1.6 Hz, 2H), 6.85 (dd, *J* = 8.1, 1.2 Hz, 2H), 6.67 (td, *J* = 7.4, 1.2 Hz, 2H), 5.31 (s, 4H) ppm.

**<sup>13</sup>C{<sup>1</sup>H} NMR** (151 MHz, DMSO-*d*<sub>6</sub>):  $\delta$  = 145.39 (s), 144.75 (s), 140.36 (s), 137.14 (s), 130.47 (d), 129.17 (d), 124.45 (d), 121.55 (d), 120.30 (s), 117.03 (d), 116.27 (d) ppm.

**<sup>77</sup>Se{<sup>1</sup>H} NMR** (76 MHz, DMSO-*d*<sub>6</sub>):  $\delta$  = 525.03 ppm.

**HR-MS** (EI<sup>+</sup>): *m/z* calculated for [C<sub>22</sub>H<sub>16</sub>N<sub>2</sub>Se<sub>2</sub>]<sup>+</sup>, [M]<sup>+</sup>: 467.96384, found: 467.96526.

**IR** (ATR):  $\nu$  [cm<sup>-1</sup>] = 3446, 3354, 3058, 3027, 2923, 2852, 1924, 1896, 1612, 1568, 1488, 1451, 1382, 1345, 1308, 1267, 1210, 1175, 1139, 1060, 1044, 915, 881, 801, 744, 645.

**UV-VIS** (DCM):  $\lambda_{\text{max}}$  [nm] = 247, 353.

**Fluorescence** (DCM):  $\lambda_{\text{ex}}$  [nm] = 350,  $\lambda_{\text{max}}$  [nm] = 376.

**Quantum yield** (DCM):  $\Phi$  = 2 %.

**2,2'-(Benzo[1,2-*b*:4,5-*b'*]diselenophene-2,6-diyl)bis(4-(*tert*-butyl)aniline) (7b)**

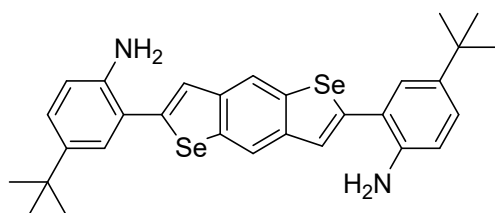

The reaction was carried out according to **GP4** with 2,2'-((2,5-difluoro-1,4-phenylene)bis(ethyne-2,1-diyl))bis(4-*tert*-butyl)aniline **5b** (2.00 g, 4.38 mmol, 1.00 eq.), Se (761 mg, 9.64 mmol, 2.20 eq.) and LiBEt<sub>3</sub>H (10.9 ml, 10.9 mmol, 2.50 eq.) to yield a brown solid (1.27 g, 2.20 mmol, 50%).

**Mp:** 102-104 °C.

**R<sub>f</sub>:** 0.70 (silica gel, PE/EA = 1:1).

**<sup>1</sup>H NMR** (400 MHz, CDCl<sub>3</sub>): δ = 8.26 (s, 2H), 7.58 (s, 2H), 7.37 (d, J = 2.3 Hz, 2H), 7.23 (dd, J = 8.4, 2.4 Hz, 2H), 6.76 (d, J = 8.4 Hz, 2H), 4.05 (s, 4H) 1.33 (s, 18H) ppm.

**<sup>13</sup>C{<sup>1</sup>H} NMR** (101 MHz, CDCl<sub>3</sub>): δ = 145.42 (s), 141.82 (s), 141.48 (s), 140.55 (s), 138.51 (s), 127.93 (d), 126.82 (d), 125.43 (d), 121.69 (s), 121.55 (d), 116.21 (d), 31.65 (q), 29.86 (s) ppm.

**<sup>77</sup>Se{<sup>1</sup>H} NMR** (76 MHz, CDCl<sub>3</sub>): δ = 531.59 ppm.

**HR-MS** (EI<sup>+</sup>): *m/z* calculated for [C<sub>30</sub>H<sub>32</sub>N<sub>2</sub>Se<sub>2</sub>]<sup>+</sup>, [M]<sup>+</sup>: 580.08904, found: 580.08124.

**IR** (ATR): ν [cm<sup>-1</sup>] = 3441, 3352, 2957, 2903, 2865, 1616, 1501, 1461, 1406, 1361, 1297, 1272, 1203, 1159, 1099, 1048, 960, 876, 818, 746, 711, 692, 658, 635.

**UV-VIS** (DCM): λ<sub>max</sub> [nm] = 242, 264, 356.

**Fluorescence** (DCM): λ<sub>ex</sub> [nm] = 360, λ<sub>max</sub> [nm] = 439.

**Quantum yield** (DCM): Φ = 2 %.

**2,2'-(Benzo[1,2-*b*:4,5-*b'*]diselenophene-2,6-diyl)bis(4-hexylaniline) (7c)**

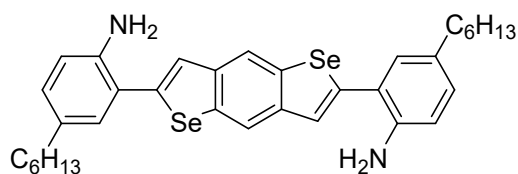

The reaction was carried out according to **GP4** with 2,2'-((2,5-difluoro-1,4-phenylene)bis(ethyne-2,1-diyl))bis(4-hexyl)aniline **5c** (2.00 g, 3.90 mmol, 1.00 eq.), Se (678 mg, 8.58 mmol, 2.20 eq.) and LiBEt<sub>3</sub>H (9.75 ml, 9.75 mmol, 2.50 eq.) to yield a brown solid (813 mg, 1.28 mmol, 33%).

**Mp:** 165-168 °C.

**R<sub>f</sub>:** 0.61 (silica gel, PE/EA = 2:1).

**<sup>1</sup>H NMR** (400 MHz, CDCl<sub>3</sub>): δ = 8.25 (s, 2H), 7.58 (s, 2H), 7.18 (d, J = 2.1 Hz, 2H), 7.01 (dd, J = 8.1, 2.1 Hz, 2H), 6.74 (d, J = 8.1 Hz, 2H), 4.01 (s, 4H), 2.59 – 2.50 (m, 4H), 1.67 – 1.54 (m, 4H), 1.38 – 1.25 (m, 12H), 0.92 – 0.87 (m, 6H) ppm.

**<sup>13</sup>C{<sup>1</sup>H} NMR** (101 MHz, CDCl<sub>3</sub>): δ = 145.12 (s), 141.66 (s), 140.56 (s), 138.48 (s), 133.54 (s), 130.92 (d), 129.69 (d), 125.38 (d), 122.08 (s), 121.54 (d), 116.47 (d), 35.23 (t), 31.91 (t), 31.85 (t), 29.15 (t), 22.79 (t), 14.26 (q) ppm.

**<sup>77</sup>Se{<sup>1</sup>H} NMR** (76 MHz, CDCl<sub>3</sub>): δ = 531.85 ppm.

**HR-MS** (MALDI<sup>+</sup>): *m/z* calculated for [C<sub>34</sub>H<sub>40</sub>N<sub>2</sub>Se<sub>2</sub>]<sup>+</sup>, [M]<sup>+</sup>: 636.1516, found: 636.1506.

**IR** (ATR): ν [cm<sup>-1</sup>] = 3437, 3402, 3350, 3323, 2952, 2923, 2852, 1618, 1552, 1496, 1453, 1423, 1376, 1304, 1262, 1232, 1178, 1153, 1115, 1049, 965, 889, 820, 749, 722, 659, 626.

**UV-VIS** (DCM): λ<sub>max</sub> [nm] = 249, 286, 357.

**Fluorescence** (DCM): λ<sub>ex</sub> [nm] = 360, λ<sub>max</sub> [nm] = 446.

**Quantum yield** (DCM): Φ = 3 %.

**2,2'-(Benzo[1,2-*b*:4,5-*b'*]ditellurophene-2,6-diyl)bis(4-(*tert*-butyl)aniline) (8)**

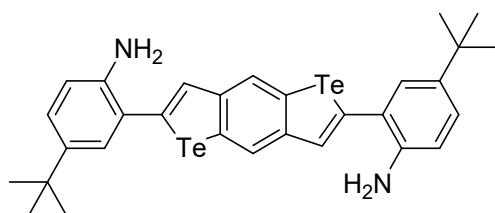

The reaction was carried out according to **GP4** with 2,2'-((2,5-difluoro-1,4-phenylene)bis(ethyne-2,1-diyl))bis(4-*tert*-butyl)aniline **5b** (500 mg, 1.10 mmol, 1.00 eq.), Te (307 mg, 2.41 mmol, 2.20 eq.) and LiBEt<sub>3</sub>H (2.74 ml, 2.74 mmol, 2.50 eq.) to yield a brown solid (186 mg, 275 μmol, 25%).

**Mp:** 290-292 °C.

**R<sub>f</sub>:** 0.70 (silica gel, PE/EA = 1:1).

**<sup>1</sup>H NMR** (400 MHz, CDCl<sub>3</sub>): δ = 8.30 (s, 2H), 7.88 (s, 2H), 7.39 (d, J = 2.3 Hz, 2H), 7.21 (dd, J = 8.3, 2.3 Hz, 2H), 6.76 (d, J = 8.3 Hz, 2H), 3.93 (s, 4H), 1.33 (s, 18H) ppm.

**<sup>13</sup>C{<sup>1</sup>H} NMR** (101 MHz, CDCl<sub>3</sub>): δ = 145.55 (s), 142.46 (s), 140.34 (s), 137.54 (s), 133.74 (d), 130.64 (d), 129.97 (s), 126.87 (d), 126.37 (s), 126.29 (d), 116.92 (s), 34.21 (s), 31.68 (q) ppm.

**<sup>125</sup>Te{<sup>1</sup>H} NMR** (126 MHz, CDCl<sub>3</sub>): δ = 756.36 ppm.

**HR-MS** (MALDI<sup>+</sup>): *m/z* calculated for [C<sub>30</sub>H<sub>32</sub>N<sub>2</sub>Te<sub>2</sub>]<sup>+</sup>, [M]<sup>+</sup>: 680.0684, found: 680.0639.

**IR** (ATR): ν [cm<sup>-1</sup>] = 3434, 3357, 2950, 2902, 2867, 1871, 1614, 1545, 1498, 1461, 1444, 1411, 1391, 1361, 1294, 1272, 1235, 1203, 1173, 1156, 1048, 959, 876, 854, 817, 741, 705, 688, 655, 635.

**UV-VIS** (DCM): λ<sub>max</sub> [nm] = 283, 365, 373, 404.

**Fluorescence** (DCM): λ<sub>ex</sub> [nm] = 375, λ<sub>max</sub> [nm] = 450.

**Quantum yield** (DCM): Φ = <1 %.

**9aa**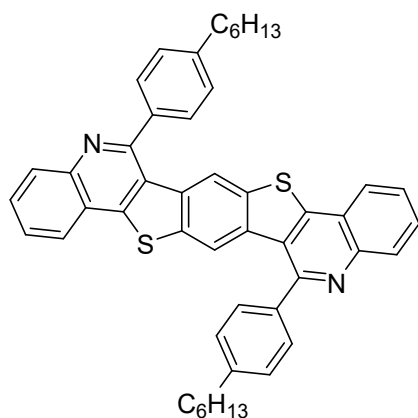

The reaction was carried out according to **GP5** with **6a** (100 mg, 268  $\mu\text{mol}$ , 1.00 eq.), 4-hexylbenzaldehyde (153 mg, 805  $\mu\text{mol}$ , 3.00 eq.) and TFA (2.63 mg, 26.9  $\mu\text{mol}$ , 0.10 eq.) to yield a light brown solid (94.0 mg, 132  $\mu\text{mol}$ , 49%).

**Mp:** >300 °C.

**<sup>1</sup>H NMR** (600 MHz, CDCl<sub>3</sub>):  $\delta$  = 8.30 – 8.25 (m, 2H), 8.11 – 8.06 (m, 2H), 7.78 (ddd,  $J$  = 8.3, 6.9, 1.4 Hz, 2H), 7.71 (s, 2H), 7.65 (ddd,  $J$  = 8.2, 6.9, 1.1 Hz, 2H), 7.62-7.61 (m, 4H), 7.49 – 7.47 (m, 4H), 2.86 (t,  $J$  = 7.5 Hz, 4H), 1.82 (m, 4H), 1.54 – 1.42 (m, 12H), 1.03 – 0.95 (m, 6H) ppm.

**<sup>13</sup>C{<sup>1</sup>H} NMR** (151 MHz, CDCl<sub>3</sub>):  $\delta$  = 156.83 (s), 148.64 (s), 144.75 (s), 144.39 (s), 137.99 (s), 136.48 (s), 134.26 (s), 130.43 (d), 130.07 (d), 129.39 (d), 128.67 (d), 127.16 (d), 126.28 (s), 123.97 (d), 123.46 (s), 118.57 (d), 36.15 (t), 32.11 (t), 31.77 (t), 29.14 (t), 22.95 (t), 14.44 (q) ppm.

**HR-MS** (MALDI<sup>+</sup>):  $m/z$  calculated for [C<sub>48</sub>H<sub>44</sub>N<sub>2</sub>S<sub>2</sub>]<sup>+</sup>, [M]<sup>+</sup>: 712.2940, found: 712.29390.

**IR** (ATR):  $\nu$  [cm<sup>-1</sup>] = 3047, 2956, 2923, 2852, 1611, 1556, 1488, 1461, 1394, 1301, 1277, 1216, 1182, 1116, 1079, 1023, 999, 923, 867, 848, 816, 756, 645, 621.

**UV-VIS** (DCM):  $\lambda_{\text{max}}$  [nm] = 273, 308, 334, 353, 370.

**Fluorescence** (DCM):  $\lambda_{\text{ex}}$  [nm] = 335,  $\lambda_{\text{max}}$  [nm] = 385.

**Quantum yield** (DCM):  $\Phi$  = 4 %.



**9ab**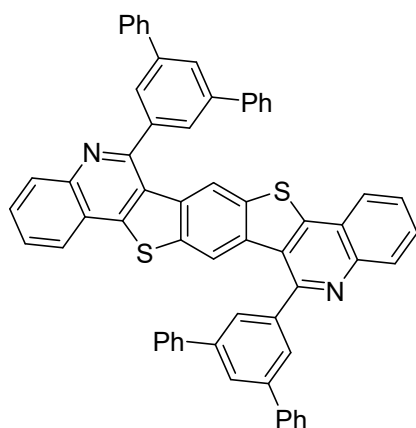

The reaction was carried out according to **GP5** with **6a** (100 mg, 268  $\mu\text{mol}$ , 1.00 eq.), 3,5-diphenylbenzaldehyde (208 mg, 805  $\mu\text{mol}$ , 3.00 eq.) and TFA (2.63 mg, 26.9  $\mu\text{mol}$ , 0.10 eq.) to yield a beige solid (126 mg, 148  $\mu\text{mol}$ , 55%).

**Mp:** >300 °C.

**$^1\text{H}$  NMR** (600 MHz,  $\text{CDCl}_3$ ):  $\delta$  = 8.30 (d,  $J$  = 8.3 Hz, 2H), 8.11-8.08 (m, 6H), 7.98-7.97 (m, 4H), 7.79-7.77 (m, 10H), 7.66-7.64 (m, 2H) 7.49-7.46 (m, 8H), 7.40 – 7.38 (m, 4H) ppm.

**$^{13}\text{C}\{^1\text{H}\}$  NMR** (151 MHz,  $\text{CDCl}_3$ ):  $\delta$  = 156.21 (s), 149.16 (s), 144.70 (s), 142.88 (s), 141.37 (s), 140.88 (s), 136.73 (s), 134.22 (s), 130.38 (d), 130.28 (d), 129.09 (d), 127.91 (d), 127.56 (d), 127.42 (d), 127.28 (d), 126.77 (d), 125.98 (s), 124.12 (d), 123.50 (s), 118.68 (d) ppm.

**HR-MS** (MALDI<sup>+</sup>):  $m/z$  calculated for  $[\text{C}_{60}\text{H}_{36}\text{N}_2\text{S}_2]^+$ ,  $[\text{M}]^+$ : 848.23140, found: 848.23220.

**IR** (ATR):  $\nu$  [ $\text{cm}^{-1}$ ] = 3054, 3031, 1594, 1555, 1486, 1423, 1396, 1363, 1295, 1274, 1205, 1156, 1076, 1028, 937, 886, 869, 857, 832, 757, 735, 713, 698, 667, 644, 614.

**UV-VIS** (DCM):  $\lambda_{\text{max}}$  [nm] = 255, 311, 334, 351.

**Fluorescence** (DCM):  $\lambda_{\text{ex}}$  [nm] = 310,  $\lambda_{\text{max}}$  [nm] = 387.

**Quantum yield** (DCM):  $\Phi$  = 3 %.

**9ac**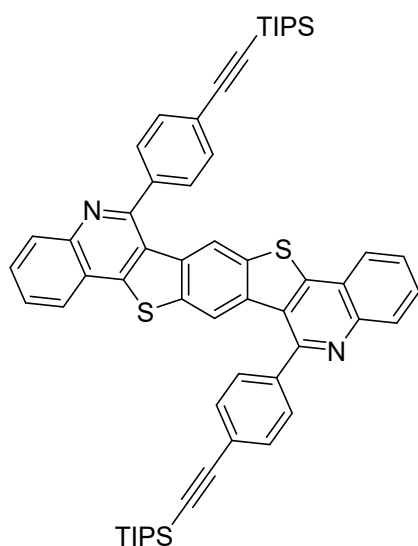

The reaction was carried out according to **GP5** with **6a** (100 mg, 268  $\mu\text{mol}$ , 1.00 eq.), 4-(triisopropylsilyl)benzaldehyde (231 mg, 805  $\mu\text{mol}$ , 3.00 eq.) and TFA (2.63 mg, 26.9  $\mu\text{mol}$ , 0.10 eq.) to yield a light brown solid (100 mg, 110  $\mu\text{mol}$ , 41%).

**Mp:** >300 °C.

**$^1\text{H}$  NMR** (400 MHz,  $\text{CDCl}_3$ ):  $\delta$  = 8.23 – 8.16 (m, 2H), 8.08 – 8.06 (m, 2H), 7.90 (s, 2H), 7.77 – 7.70 (m, 6H), 7.68 – 7.58 (m, 6H), 1.22 – 1.13 (m, 42H) ppm.

**$^{13}\text{C}\{^1\text{H}\}$  NMR** (101 MHz,  $\text{CDCl}_3$ ):  $\delta$  = 155.77 (s), 149.12 (s), 144.80 (s), 140.62 (s), 136.66 (s), 134.18 (s), 132.89 (d), 130.50 (d), 130.28 (d), 129.00 (d), 127.49 (d), 125.74 (s), 124.84 (s), 124.09 (d), 123.49 (s), 118.57 (d), 106.98 (s), 92.53 (s), 18.93 (d), 11.60 (q) ppm.

**HR-MS** (MALDI<sup>+</sup>):  $m/z$  calculated for  $[\text{C}_{58}\text{H}_{61}\text{N}_2\text{S}_2\text{Si}_2]^+$ ,  $[\text{M}+\text{H}]^+$ : 905.38090, found: 905.37980.

**IR** (ATR):  $\nu$  [ $\text{cm}^{-1}$ ] = 2941, 2890, 2863, 2153, 1605, 1556, 1487, 1461, 1401, 1363, 1302, 1277, 1215, 1179, 1104, 1078, 1019, 996, 922, 883, 832, 776, 755, 668, 618.

**UV-VIS** (DCM):  $\lambda_{\text{max}}$  [nm] = 254, 274, 301, 333, 354.

**Fluorescence** (DCM):  $\lambda_{\text{ex}}$  [nm] = 355,  $\lambda_{\text{max}}$  [nm] = 408.

**Quantum yield** (DCM):  $\Phi$  = 2 %.

**9ba**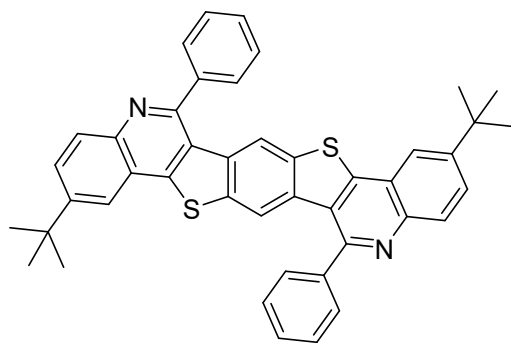

The reaction was carried out according to **GP5** with **6b** (50 mg, 103  $\mu\text{mol}$ , 1.00 eq.), benzaldehyde (32.8 mg, 309  $\mu\text{mol}$ , 3.00 eq.) and TFA (1.01 mg, 10.3  $\mu\text{mol}$ , 0.10 eq.) to yield a light yellow solid (66.0 mg, 100  $\mu\text{mol}$ , 97%).

**Mp:** >300 °C.

**$^1\text{H}$  NMR** (600 MHz,  $\text{CDCl}_3$ ):  $\delta$  = 8.22 (d,  $J$  = 8.8 Hz, 2H), 8.01 (d,  $J$  = 2.1 Hz, 2H), 7.89 (dd,  $J$  = 8.8, 2.2 Hz, 2H), 7.73 – 7.64 (m, 12H), 1.49 (s, 18H) ppm.

**$^{13}\text{C}\{^1\text{H}\}$  NMR** (151 MHz,  $\text{CDCl}_3$ ):  $\delta$  = 155.97 (s), 150.56 (s), 148.71 (s), 143.10 (s), 140.87 (s), 136.52 (s), 134.31 (s), 130.69 (d), 129.98 (d), 129.37 (d), 129.28 (d), 129.10 (d), 128.85 (d), 127.86 (d), 126.09 (s), 123.13 (s), 119.18 (d), 118.44 (d), 35.36 (s), 31.42 (q) ppm.

**HR-MS** (MALDI<sup>+</sup>):  $m/z$  calculated for  $[\text{C}_{44}\text{H}_{36}\text{N}_2\text{S}_2]^+$ ,  $[\text{M}]^+$ : 656.23140, found: 656.23120.

**IR** (ATR):  $\nu$  [ $\text{cm}^{-1}$ ] = 3055, 2955, 2903, 2866, 1950, 1723, 1703, 1621, 1553, 1494, 1457, 1440, 1402, 1387, 1364, 1302, 1282, 1253, 1219, 1154, 1127, 1104, 1080, 1026, 951, 917, 866, 842, 791, 767, 750, 707, 670, 646, 617.

**UV-VIS** (DCM):  $\lambda_{\text{max}}$  [nm] = 274, 310, 335, 353, 371.

**Fluorescence** (DCM):  $\lambda_{\text{ex}}$  [nm] = 330,  $\lambda_{\text{max}}$  [nm] = 380.

**Quantum yield** (DCM):  $\Phi$  = 5 %.

**9bb**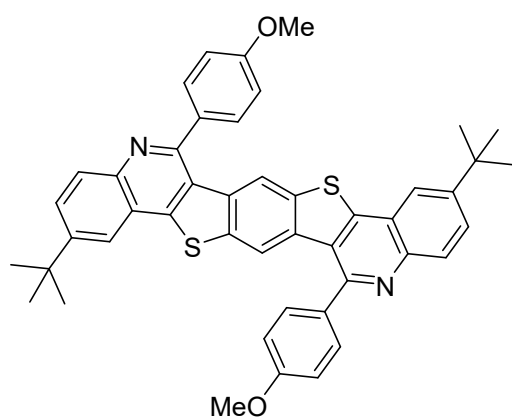

The reaction was carried out according to **GP5** with **6b** (100 mg, 206  $\mu\text{mol}$ , 1.00 eq.), 4-methoxybenzaldehyde (84.3 mg, 619  $\mu\text{mol}$ , 3.00 eq.) and TFA (2.02 mg, 20.6  $\mu\text{mol}$ , 0.10 eq.) to yield a beige solid (63.0 mg, 87.9  $\mu\text{mol}$ , 43%).

**Mp:** >300 °C.

**$^1\text{H NMR}$**  (400 MHz,  $\text{CDCl}_3$ ):  $\delta$  = 8.21 (dd,  $J$  = 8.8, 0.5 Hz, 2H), 8.01 (dd,  $J$  = 2.1, 0.6 Hz, 2H), 7.91 (s, 2H), 7.91 – 7.84 (m, 2H), 7.69 – 7.64 (m, 4H), 7.23 – 7.14 (m, 4H), 4.02 (s, 6H), 1.49 (s, 18H) ppm.

**$^{13}\text{C}\{^1\text{H}\}$  NMR** (101 MHz,  $\text{CDCl}_3$ ):  $\delta$  = 160.64 (s), 155.80 (s), 150.38 (s), 148.72 (s), 143.23 (s), 136.51 (s), 134.49 (s), 133.42 (s), 130.35 (d), 129.94 (d), 128.98 (d), 126.23 (s), 123.05 (s), 119.17 (d), 118.52 (d), 114.65 (d), 55.75 (q), 35.35 (s), 31.44 (q) ppm.

**HR-MS** (MALDI<sup>+</sup>):  $m/z$  calculated for  $[\text{C}_{46}\text{H}_{40}\text{N}_2\text{S}_2]^+$ ,  $[\text{M}]^+$ : 716.25260, found: 716.25220.

**IR** (ATR):  $\nu$  [ $\text{cm}^{-1}$ ] = 2961, 2906, 2869, 2836, 1606, 1577, 1551, 1513, 1493, 1462, 1434, 1383, 1364, 1302, 1245, 1219, 1173, 1107, 1081, 1032, 952, 867, 838, 812, 761, 703, 663, 649, 626.

**UV-VIS** (DCM):  $\lambda_{\text{max}}$  [nm] = 274, 306, 335, 354, 372.

**Fluorescence** (DCM):  $\lambda_{\text{ex}}$  [nm] = 355,  $\lambda_{\text{max}}$  [nm] = 390.

**Quantum yield** (DCM):  $\Phi$  = 4 %.

**9bc**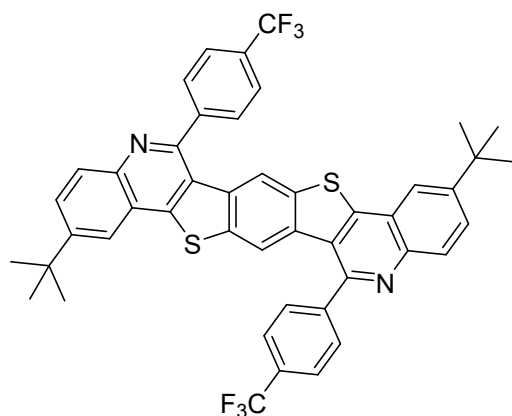

The reaction was carried out according to **GP5** with **6b** (50 mg, 103  $\mu\text{mol}$ , 1.00 eq.), 4-trifluoromethylbenzaldehyde (53.9 mg, 309  $\mu\text{mol}$ , 3.00 eq.) and TFA (1.01 mg, 10.3  $\mu\text{mol}$ , 0.10 eq.) to yield a beige solid (66.0 mg, 83.2  $\mu\text{mol}$ , 81%).

**Mp:** >300 °C.

**$^1\text{H}$  NMR** (600 MHz,  $\text{CDCl}_3$ ):  $\delta$  = 8.21 (d,  $J$  = 8.8 Hz, 2H), 8.04 (d,  $J$  = 2.1 Hz, 2H), 7.96 (d,  $J$  = 8.0 Hz, 4H), 7.92 (dd,  $J$  = 8.8, 2.1 Hz, 2H), 7.88 (d,  $J$  = 8.0 Hz, 4H), 7.76 (s, 2H), 1.50 (s, 18H) ppm.

**$^{13}\text{C}\{^1\text{H}\}$  NMR** (151 MHz,  $\text{CDCl}_3$ ):  $\delta$  = 154.13 (s), 151.20 (s), 149.22 (s), 144.47 (s), 143.03 (s), 136.65 (s), 134.00 (s), 129.96 (d), 129.54 (d), 126.29 (q), 125.44 (s), 123.19 (s), 119.27 (d), 118.18 (d), 35.44 (s), 31.40 (q) ppm.

**$^{19}\text{F}\{^1\text{H}\}$  NMR** (282 MHz,  $\text{CDCl}_3$ ):  $\delta$  = -62.40 ppm.

**HR-MS** (MALDI<sup>+</sup>):  $m/z$  calculated for  $[\text{C}_{46}\text{H}_{34}\text{F}_6\text{N}_2\text{S}_2]^+$ ,  $[\text{M}]^+$ : 792.20620, found: 792.20550.

**IR** (ATR):  $\nu$  [ $\text{cm}^{-1}$ ] = 2966, 2908, 2870, 1928, 1616, 1549, 1491, 1404, 1384, 1365, 1321, 1251, 1217, 1168, 1127, 1105, 1082, 1073, 1062, 1018, 952, 845, 828, 806, 762, 703, 677, 647, 629.

**UV-VIS** (DCM):  $\lambda_{\text{max}}$  [nm] = 276, 313, 334, 353, 370.

**Fluorescence** (DCM):  $\lambda_{\text{ex}}$  [nm] = 355,  $\lambda_{\text{max}}$  [nm] = 386.

**Quantum yield** (DCM):  $\Phi$  = 4 %.

**9bd**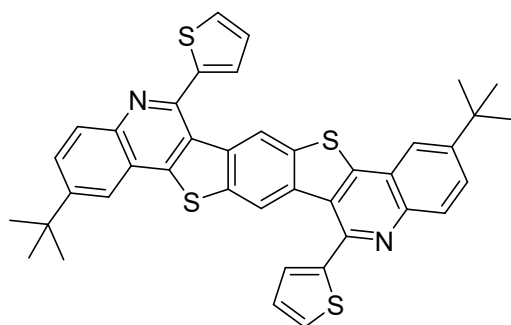

The reaction was carried out according to **GP5** with **6b** (100 mg, 206  $\mu\text{mol}$ , 1.00 eq.), thiophen-2-carbaldehyde (69.4 mg, 619  $\mu\text{mol}$ , 3.00 eq.) and TFA (2.02 mg, 20.6  $\mu\text{mol}$ , 0.10 eq.) to yield a black solid (134 mg, 200  $\mu\text{mol}$ , 97%).

**Mp:** >300 °C.

**$^1\text{H NMR}$**  (400 MHz,  $\text{CDCl}_3$ ):  $\delta$  = 8.22 (d,  $J$  = 8.8 Hz, 2H), 8.03 (s, 2H), 8.01 (d,  $J$  = 2.1 Hz, 2H), 7.89 (dd,  $J$  = 8.9, 2.2 Hz, 2H), 7.68 (dd,  $J$  = 5.1, 1.2 Hz, 2H), 7.51 (dd,  $J$  = 3.5, 1.2 Hz, 2H), 7.35 (dd,  $J$  = 5.1, 3.5 Hz, 2H), 1.50 (s, 18H) ppm.

**$^{13}\text{C}\{^1\text{H}\}$  NMR** (151 MHz,  $\text{CDCl}_3$ ):  $\delta$  = 151.01 (s), 149.12 (s), 148.89 (s), 143.09 (s), 141.85 (s), 136.59 (s), 134.31 (s), 130.07 (d), 129.24 (d), 128.21 (d), 127.66 (d), 127.64 (d), 126.77 (s), 123.32 (s), 119.18 (d), 118.31 (d), 35.42 (s), 31.40 (q) ppm.

**HR-MS** (MALDI<sup>+</sup>):  $m/z$  calculated for  $[\text{C}_{40}\text{H}_{32}\text{N}_2\text{S}_4]^+$ ,  $[\text{M}]^+$ : 668.14430, found: 668.14360.

**IR** (ATR):  $\nu$  [ $\text{cm}^{-1}$ ] = 2964, 2906, 2869, 1617, 1549, 1493, 1384, 1364, 1323, 1252, 1166, 1124, 1105, 1081, 1062, 1019, 952, 845, 829, 807, 759, 700, 677, 648, 629.

**UV-VIS** (DCM):  $\lambda_{\text{max}}$  [nm] = 273, 313, 336, 356.

**Fluorescence** (DCM):  $\lambda_{\text{ex}}$  [nm] = 360,  $\lambda_{\text{max}}$  [nm] = 466.

**Quantum yield** (DCM):  $\Phi$  = 4 %.

**9be**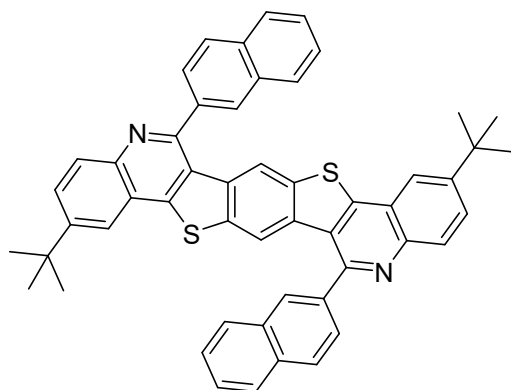

The reaction was carried out according to **GP5** with **6b** (50 mg, 103  $\mu\text{mol}$ , 1.00 eq.), 2-naphthaldehyde (48.3 mg, 309  $\mu\text{mol}$ , 3.00 eq.) and TFA (1.01 mg, 10.3  $\mu\text{mol}$ , 0.10 eq.) to yield a yellow solid (22.0 mg, 29.0  $\mu\text{mol}$ , 28%).

**Mp:** >300 °C.

**$^1\text{H}$  NMR** (400 MHz,  $\text{CDCl}_3$ ):  $\delta$  = 8.27 (s, 2H), 8.22 (d,  $J$  = 8.8 Hz, 2H), 8.13 (d,  $J$  = 8.4 Hz, 2H), 8.10 – 8.05 (m, 2H), 7.99 (d,  $J$  = 7.8 Hz, 2H), 7.95 (d,  $J$  = 2.0 Hz, 2H), 7.88 (dd,  $J$  = 8.8, 2.2 Hz, 2H), 7.83 (s, 2H), 7.80 (dd,  $J$  = 8.3, 1.8 Hz, 2H), 7.72 – 7.59 (m, 4H), 1.47 (s, 18H) ppm.

**$^{13}\text{C}\{^1\text{H}\}$  NMR** (151 MHz,  $\text{CDCl}_3$ ):  $\delta$  = 155.80 (s), 150.60 (s), 148.93 (s), 143.24 (s), 138.30 (s), 136.57 (s), 134.33 (s), 133.86 (s), 133.82 (s), 130.70 (s), 129.99 (d), 129.10 (d), 128.87 (d), 128.80 (d), 128.37 (d), 128.22 (d), 127.86 (d), 126.96 (d), 126.84 (d), 126.69 (d), 126.03 (s), 123.11 (s), 119.21 (d), 118.56 (d), 35.35 (s), 31.41 (q) ppm.

**HR-MS** (MALDI<sup>+</sup>):  $m/z$  calculated for  $[\text{C}_{52}\text{H}_{40}\text{N}_2\text{S}_2]^+$ ,  $[\text{M}]^+$ : 756.26270, found: 756.26200.

**IR** (ATR):  $\nu$  [ $\text{cm}^{-1}$ ] = 3056, 2960, 2904, 2867, 1947, 1738, 1688, 1619, 1548, 1493, 1456, 1433, 1384, 1361, 1299, 1252, 1214, 1192, 1128, 1102, 1079, 1018, 1006, 939, 902, 871, 859, 842, 824, 791, 773, 754, 706, 679, 646, 625.

**UV-VIS** (DCM):  $\lambda_{\text{max}}$  [nm] = 272, 309, 333, 353, 373.

**Fluorescence** (DCM):  $\lambda_{\text{ex}}$  [nm] = 330,  $\lambda_{\text{max}}$  [nm] = 405.

**Quantum yield** (DCM):  $\Phi$  = 1 %.

**9bf**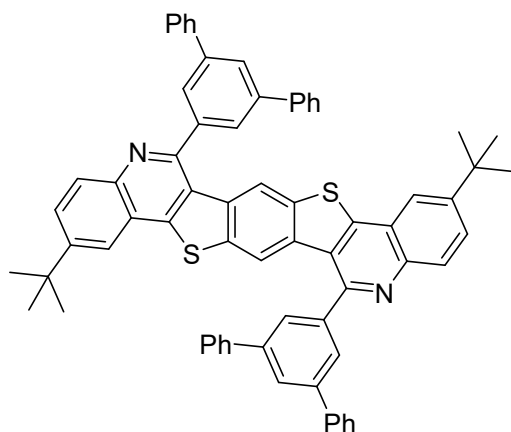

The reaction was carried out according to **GP5** with **6b** (50 mg, 103  $\mu\text{mol}$ , 1.00 eq.), 3,5-diphenylbenzaldehyde (80.0 mg, 309  $\mu\text{mol}$ , 3.00 eq.) and TFA (1.01 mg, 10.3  $\mu\text{mol}$ , 0.10 eq.) to yield a beige solid (58.0 mg, 60.3  $\mu\text{mol}$ , 58%).

**Mp:** >300 °C.

**$^1\text{H}$  NMR** (600 MHz,  $\text{CDCl}_3$ ):  $\delta$  = 8.24 (d,  $J$  = 8.7 Hz, 2H), 8.13 (t,  $J$  = 1.7 Hz, 2H), 8.08 (s, 2H), 7.99 (d,  $J$  = 2.1 Hz, 2H), 7.97 (d,  $J$  = 1.7 Hz, 4H), 7.90 (dd,  $J$  = 8.8, 2.2 Hz, 2H), 7.81 – 7.76 (m, 8H), 7.52 – 7.42 (m, 8H), 7.42 – 7.36 (m, 4H), 1.49 (s, 18H) ppm.

**$^{13}\text{C}\{^1\text{H}\}$  NMR** (151 MHz,  $\text{CDCl}_3$ ):  $\delta$  = 155.60 (s), 150.66 (s), 149.04 (s), 143.18 (s), 142.84 (s), 141.64 (s), 140.98 (s), 136.75 (s), 134.39 (s), 130.68 (s), 129.98 (d), 129.22 (d), 129.08 (d), 127.87 (d), 127.58 (d), 127.12 (d), 126.79 (d), 126.01 (s), 123.17 (s), 119.27 (d), 118.62 (d), 35.38 (s), 31.41 (q) ppm.

**HR-MS** (MALDI<sup>+</sup>):  $m/z$  calculated for  $[\text{C}_{68}\text{H}_{52}\text{N}_2\text{S}_2]^+$ ,  $[\text{M}]^+$ : 960.35660, found: 960.35600.

**IR** (ATR):  $\nu$  [ $\text{cm}^{-1}$ ] = 3059, 3036, 2962, 2904, 2868, 1595, 1548, 1495, 1462, 1425, 1383, 1363, 1292, 1251, 1214, 1096, 1077, 1031, 1003, 958, 886, 865, 833, 759, 720, 697, 650, 632, 613.

**UV-VIS** (DCM):  $\lambda_{\text{max}}$  [nm] = 274, 316, 343, 361, 377.

**Fluorescence** (DCM):  $\lambda_{\text{ex}}$  [nm] = 360,  $\lambda_{\text{max}}$  [nm] = 390.

**Quantum yield** (DCM):  $\Phi$  = 3 %.



**9bg**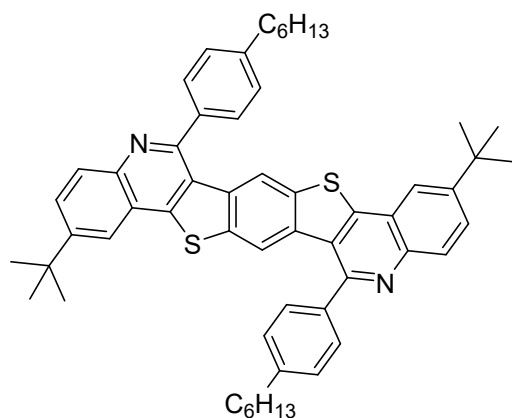

The reaction was carried out according to **GP5** with **6b** (50 mg, 103  $\mu$ mol, 1.00 eq.), 4-hexylbenzaldehyde (58.9 mg, 309  $\mu$ mol, 3.00 eq.) and TFA (1.01 mg, 10.3  $\mu$ mol, 0.10 eq.) to yield a beige solid (66.0 mg, 80.0  $\mu$ mol, 78%).

**Mp:** 195-200 °C.

**<sup>1</sup>H NMR** (600 MHz, CDCl<sub>3</sub>):  $\delta$  = 8.52 (d, *J* = 8.6 Hz, 2H), 8.17 – 8.12 (m, 4H), 7.91 (s, 2H), 7.75 – 7.69 (m, 4H), 7.60 – 7.55 (m, 4H), 2.90 (t, *J* = 7.7 Hz, 4H), 1.83 (m, 4H), 1.54 – 1.39 (m, 12H), 1.01 – 0.95 (m, 6H) ppm.

**<sup>13</sup>C{<sup>1</sup>H} NMR** (151 MHz, CDCl<sub>3</sub>):  $\delta$  = 160.65 (s), 156.11 (s), 154.43 (s), 152.47 (s), 148.18 (s), 137.20 (s), 134.43 (s), 134.14 (s), 133.54 (d), 129.94 (d), 129.02 (d), 128.34 (s), 125.19 (s), 123.15 (d), 123.05 (s), 119.51 (d), 119.09 (d), 36.25 (s), 35.86 (t), 31.92 (t), 31.22 (t), 31.11 (q), 29.07 (t), 22.82 (t), 14.37 (q) ppm.

**HR-MS** (MALDI<sup>+</sup>): *m/z* calculated for [C<sub>56</sub>H<sub>60</sub>N<sub>2</sub>S<sub>2</sub>]<sup>+</sup>, [M]<sup>+</sup>: 824.41920, found: 824.41920.

**IR** (ATR):  $\nu$  [cm<sup>-1</sup>] = 2968, 2934, 2860, 1757, 1647, 1610, 1492, 1458, 1427, 1377, 1308, 1199, 1157, 1130, 1022, 953, 876, 834, 795, 781, 724, 701, 669, 650, 633.

**UV-VIS** (DCM):  $\lambda_{\text{max}}$  [nm] = 269, 313, 337, 355, 375.

**Fluorescence** (DCM):  $\lambda_{\text{ex}}$  [nm] = 335,  $\lambda_{\text{max}}$  [nm] = 385.

**Quantum yield** (DCM):  $\Phi$  = 4 %.

**9ca**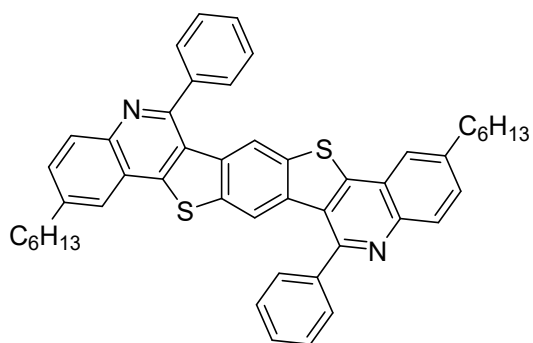

The reaction was carried out according to **GP5** with **6c** (50 mg, 92.5  $\mu\text{mol}$ , 1.00 eq.), benzaldehyde (29.4 mg, 277  $\mu\text{mol}$ , 3.00 eq.) and TFA (906  $\mu\text{g}$ , 9.25  $\mu\text{mol}$ , 0.10 eq.) to yield a brown solid (35.0 mg, 49.1  $\mu\text{mol}$ , 53%).

**Mp:** >300 °C.

**$^1\text{H}$  NMR** (600 MHz,  $\text{CDCl}_3$ ):  $\delta$  = 8.23 (d,  $J$  = 8.5 Hz, 2H), 7.87 (dd,  $J$  = 1.9, 0.7 Hz, 2H), 7.75 – 7.63 (m, 14H), 2.87 (t,  $J$  = 7.8 Hz, 4H), 1.80 – 1.70 (m, 4H), 1.46 – 1.28 (m, 12H), 0.94 – 0.86 (m, 6H) ppm.

**$^{13}\text{C}\{^1\text{H}\}$  NMR** (151 MHz,  $\text{CDCl}_3$ ):  $\delta$  = 142.81 (s), 136.57 (s), 134.23 (s), 132.07 (d), 129.60 (s), 129.31 (d), 128.90 (d), 125.98 (s), 123.43 (s), 122.51 (d), 118.48 (d), 36.26 (t), 31.86 (t), 31.42 (t), 29.13 (t), 22.75 (t), 14.27 (q) ppm.

**HR-MS** (EI+):  $m/z$  calculated for  $[\text{C}_{48}\text{H}_{44}\text{N}_2\text{S}_2]^+$ ,  $[\text{M}]^+$ : 712.29400, found: 712.29350.

**IR** (ATR):  $\nu$  [ $\text{cm}^{-1}$ ] = 3056, 2952, 2927, 2853, 1915, 1621, 1552, 1492, 1457, 1442, 1400, 1383, 1300, 1275, 1212, 1079, 1027, 952, 863, 831, 814, 755, 723, 695, 671, 657, 634, 615.

**UV-VIS** (DCM):  $\lambda_{\text{max}}$  [nm] = 274, 310, 335, 352, 371.

**Fluorescence** (DCM):  $\lambda_{\text{ex}}$  [nm] = 350,  $\lambda_{\text{max}}$  [nm] = 382.

**Quantum yield** (DCM):  $\Phi$  = 4 %.

**9cb**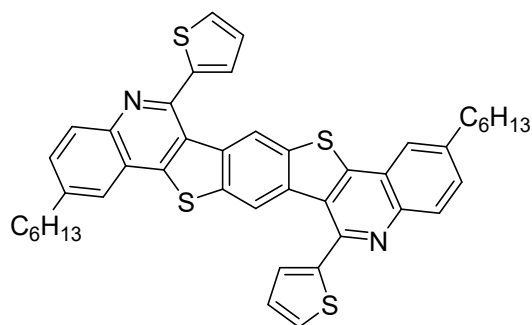

The reaction was carried out according to **GP5** with **6c** (50 mg, 92.5  $\mu$ mol, 1.00 eq.), 2-thiophenecarboxaldehyde (31.1 mg, 277  $\mu$ mol, 3.00 eq.) and TFA (906  $\mu$ g, 9.25  $\mu$ mol, 0.10 eq.) to yield a black solid (49.0 mg, 68.0  $\mu$ mol, 73%).

**Mp:** >300 °C.

**<sup>1</sup>H NMR** (700 MHz, CDCl<sub>3</sub>):  $\delta$  = 8.18 (d, *J* = 8.4 Hz, 2H), 8.03 (s, 2H), 7.86 (s, 2H), 7.68 (dd, *J* = 5.2, 1.2 Hz, 2H), 7.64 (dd, *J* = 8.5, 1.9 Hz, 2H), 7.52 (dd, *J* = 3.4, 1.2 Hz, 2H), 7.35 (dd, *J* = 5.3, 3.4 Hz, 2H), 2.87 (t, *J* = 7.8 Hz, 4H), 1.81 – 1.70 (m, 4H), 1.39 – 1.27 (m, 12H), 0.91 (t, *J* = 6.9 Hz, 6H) ppm.

**<sup>13</sup>C{<sup>1</sup>H} NMR** (176 MHz, CDCl<sub>3</sub>):  $\delta$  = 148.89 (s), 148.42 (s), 143.26 (s), 142.92 (s), 141.82 (s), 136.57 (s), 134.24 (s), 131.84 (d), 130.21 (d), 128.25 (d), 127.68 (d), 127.63 (d), 126.70 (s), 123.61 (s), 122.47 (d), 118.30 (d), 36.28 (t), 31.86 (t), 31.37 (t), 29.13 (t), 22.75 (t), 14.26 (q) ppm.

**HR-MS** (MALDI<sup>+</sup>): *m/z* calculated for [C<sub>44</sub>H<sub>40</sub>N<sub>2</sub>S<sub>4</sub>]<sup>+</sup>, [M]<sup>+</sup>: 724.20690, found: 724.20760.

**IR** (ATR):  $\nu$  [cm<sup>-1</sup>] = 2952, 2926, 2853, 1680, 1620, 1551, 1492, 1454, 1384, 1294, 1223, 1197, 1075, 1053, 940, 866, 851, 829, 753, 694, 629.

**UV-VIS** (DCM):  $\lambda_{\text{max}}$  [nm] = 274, 314, 334, 355, 416.

**Fluorescence** (DCM):  $\lambda_{\text{ex}}$  [nm] = 355,  $\lambda_{\text{max}}$  [nm] = 468.

**Quantum yield** (DCM):  $\Phi$  = 8 %.

**9cc**

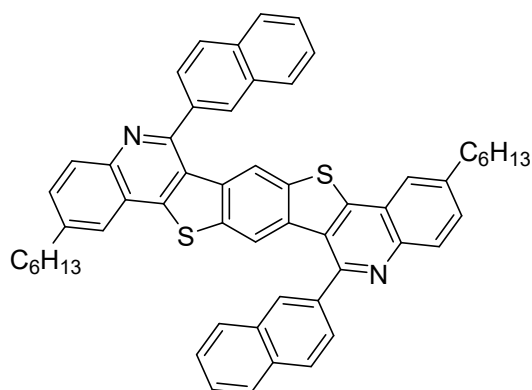

The reaction was carried out according to **GP5** with **6c** (50 mg, 92.5  $\mu\text{mol}$ , 1.00 eq.), 2-naphthaldehyde (43.3 mg, 277  $\mu\text{mol}$ , 3.00 eq.) and TFA (906  $\mu\text{g}$ , 9.25  $\mu\text{mol}$ , 0.10 eq.) to yield a light brown solid (25.0 mg, 30.8  $\mu\text{mol}$ , 33%).

**Mp:** >300 °C.

**$^1\text{H NMR}$**  (600 MHz,  $\text{CDCl}_3$ ):  $\delta$  = 8.28 (d,  $J$  = 1.7 Hz, 2H), 8.19 (d,  $J$  = 8.5 Hz, 2H), 8.13 (d,  $J$  = 8.2 Hz, 2H), 8.07 (d,  $J$  = 8.1 Hz, 2H), 7.99 (d,  $J$  = 8.0 Hz, 2H), 7.83 – 7.79 (m, 6H), 7.70 – 7.62 (m, 6H), 2.84 (t,  $J$  = 7.8 Hz, 4H), 1.78 – 1.68 (m, 4H), 1.43 – 1.30 (m, 12H), 0.91 – 0.88 (m, 6H) ppm.

**$^{13}\text{C}\{^1\text{H}\}$  NMR** (151 MHz,  $\text{CDCl}_3$ ):  $\delta$  = 155.56 (s), 148.44 (s), 143.43 (s), 142.51 (s), 138.23 (s), 136.55 (s), 134.27 (s), 133.78 (s), 131.72 (d), 130.15 (d), 128.77 (d), 128.40 (d), 128.20 (d), 126.98 (d), 126.84 (d), 126.68 (d), 126.00 (s), 124.96 (s), 123.41 (s), 122.51 (d), 118.57 (d), 36.23 (t), 31.85 (t), 31.42 (t), 29.13 (t), 22.74 (t), 14.26 (q) ppm.

**HR-MS** (MALDI<sup>+</sup>):  $m/z$  calculated for  $[\text{C}_{56}\text{H}_{48}\text{N}_2\text{S}_2]^+$ ,  $[\text{M}]^+$ : 812.32530, found: 812.32410.

**IR** (ATR):  $\nu$  [ $\text{cm}^{-1}$ ] = 3047, 2926, 2852, 1737, 1621, 1549, 1492, 1457, 1384, 1301, 1275, 1209, 1191, 1128, 1079, 1006, 941, 899, 853, 835, 811, 791, 767, 750, 732, 676, 642, 608.

**UV-VIS** (DCM):  $\lambda_{\text{max}}$  [nm] = 273, 310, 334, 354, 375.

**Fluorescence** (DCM):  $\lambda_{\text{ex}}$  [nm] = 355,  $\lambda_{\text{max}}$  [nm] = 390.

**Quantum yield** (DCM):  $\Phi$  = 1 %.

### 9cd

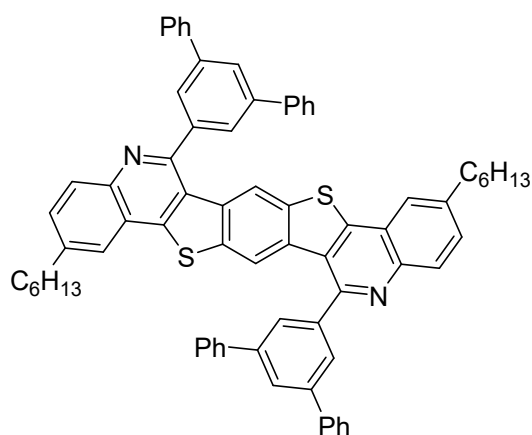

The reaction was carried out according to **GP5** with **6c** (50 mg, 92.5  $\mu\text{mol}$ , 1.00 eq.), 3,5-diphenylbenzaldehyde (71.6 mg, 277  $\mu\text{mol}$ , 3.00 eq.) and TFA (906  $\mu\text{g}$ , 9.25  $\mu\text{mol}$ , 0.10 eq.) to yield a light brown solid (40.0 mg, 39.3  $\mu\text{mol}$ , 43%).

**Mp:** >300 °C.

**$^1\text{H}$  NMR** (600 MHz,  $\text{CDCl}_3$ ):  $\delta$  = 8.20 (d,  $J$  = 8.4 Hz, 2H), 8.11 (t,  $J$  = 1.8 Hz, 2H), 8.07 (s, 2H), 7.97 (d,  $J$  = 1.7 Hz, 4H), 7.84 (s, 2H), 7.80 – 7.75 (m, 8H), 7.63 (dd,  $J$  = 8.5, 1.9 Hz, 2H), 7.48 (t,  $J$  = 7.7 Hz, 8H), 7.42 – 7.36 (m, 4H), 2.86 (t,  $J$  = 7.8 Hz, 4H), 1.80 – 1.72 (m, 4H), 1.45 – 1.28 (m, 12H), 0.93 – 0.85 (m, 6H) ppm.

**$^{13}\text{C}\{^1\text{H}\}$  NMR** (151 MHz,  $\text{CDCl}_3$ ):  $\delta$  = 155.36 (s), 148.53 (s), 143.38 (s), 142.81 (s), 142.57 (s), 141.60 (s), 140.96 (s), 136.72 (s), 134.30 (s), 131.75 (d), 130.15 (d), 129.08 (d), 127.86 (d), 127.56 (d), 127.08 (d), 126.82 (d), 125.97 (s), 123.48 (s), 122.58 (d), 118.62 (d), 36.25 (t), 31.85 (t), 31.44 (t), 29.16 (t), 22.76 (t), 14.26 (q) ppm.

**HR-MS** (EI<sup>+</sup>):  $m/z$  calculated for  $[\text{C}_{72}\text{H}_{60}\text{N}_2\text{S}_2]^+$ ,  $[\text{M}]^+$ : 1016.41920, found: 1016.41900.

**IR** (ATR):  $\nu$  [ $\text{cm}^{-1}$ ] = 3057, 2955, 2926, 2854, 1594, 1551, 1493, 1465, 1423, 1399, 1381, 1289, 1205, 1077, 1029, 866, 827, 756, 712, 697, 644, 614.

**UV-VIS** (DCM):  $\lambda_{\text{max}}$  [nm] = 256, 313, 336, 354, 373.

**Fluorescence** (DCM):  $\lambda_{\text{ex}}$  [nm] = 355,  $\lambda_{\text{max}}$  [nm] = 383.

**Quantum yield** (DCM):  $\Phi$  = 2 %.

**9ce**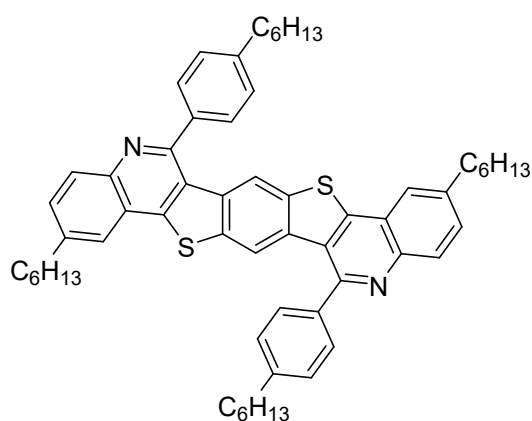

The reaction was carried out according to **GP5** with **6c** (50 mg, 92.5  $\mu$ mol, 1.00 eq.), 4-hexylbenzaldehyde (52.8 mg, 277  $\mu$ mol, 3.00 eq.) and TFA (906  $\mu$ g, 9.25  $\mu$ mol, 0.10 eq.) to yield a beige solid (67.0 mg, 76.0  $\mu$ mol, 82%).

**Mp:** >300 °C.

**<sup>1</sup>H NMR** (600 MHz, CDCl<sub>3</sub>):  $\delta$  = 8.18 (d, *J* = 8.5 Hz, 2H), 7.84 (d, *J* = 1.8 Hz, 2H), 7.70 (s, 2H), 7.62 (dd, *J* = 8.7, 2.0 Hz, 2H), 7.60 (d, *J* = 7.8 Hz, 4H), 7.47 (d, *J* = 7.8 Hz, 4H), 2.86 (m, 8H), 1.78 (m, 8H), 1.54 – 1.29 (m, 24H), 1.02 – 0.97 (m, 6H), 0.93 – 0.86 (m, 6H) ppm.

**<sup>13</sup>C{<sup>1</sup>H} NMR** (151 MHz, CDCl<sub>3</sub>):  $\delta$  = 156.00 (s), 148.07 (s), 144.20 (s), 143.36 (s), 142.32 (s), 138.13 (s), 136.46 (s), 134.33 (s), 131.57 (d), 130.16 (d), 129.35 (d), 128.70 (d), 126.26 (s), 123.42 (s), 122.46 (d), 118.51 (d), 36.28 (t), 36.15 (t), 32.14 (t), 31.87 (t), 31.75 (t), 31.54 (t), 29.16 (t), 29.11 (t), 22.96 (t), 22.76 (t), 14.48 (q), 14.27 (q) ppm.

**HR-MS** (MALDI<sup>+</sup>): *m/z* calculated for [C<sub>60</sub>H<sub>68</sub>N<sub>2</sub>S<sub>2</sub>]<sup>+</sup>, [M]<sup>+</sup>: 880.48180, found: 880.48140.

**IR** (ATR):  $\nu$  [cm<sup>-1</sup>] = 2953, 2931, 2860, 1741, 1666, 1615, 1573, 1511, 1468, 1390, 1269, 1207, 1171, 1153, 1022, 893, 838, 792, 778, 725, 704, 673, 618.

**UV-VIS** (DCM):  $\lambda_{\text{max}}$  [nm] = 274, 309, 335, 353, 380.

**Fluorescence** (DCM):  $\lambda_{\text{ex}}$  [nm] = 355,  $\lambda_{\text{max}}$  [nm] = 391.

**Quantum yield** (DCM):  $\Phi$  = 3 %.

**10aa**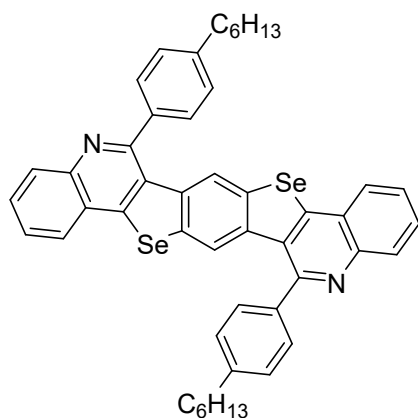

The reaction was carried out according to **GP5** with **7a** (100 mg, 214  $\mu\text{mol}$ , 1.00 eq.), 4-hexylbenzaldehyde (122 mg, 643  $\mu\text{mol}$ , 3.00 eq.) and TFA (2.10 mg, 21.4  $\mu\text{mol}$ , 0.10 eq.) to yield a brown solid (85.0 mg, 105  $\mu\text{mol}$ , 49%).

**Mp:** 280-283 °C.

**$^1\text{H}$  NMR** (500 MHz,  $\text{CDCl}_3$ ):  $\delta$  = 8.25 (d,  $J$  = 8.1 Hz, 2H), 7.91 (dd,  $J$  = 8.2, 1.3 Hz, 2H), 7.77 (ddd,  $J$  = 8.4, 6.9, 1.4 Hz, 2H), 7.63 (ddd,  $J$  = 8.1, 6.9, 1.2 Hz, 2H), 7.57 (d,  $J$  = 9.0 Hz, 6H), 7.46 (d,  $J$  = 8.0 Hz, 4H), 2.84 (t,  $J$  = 7.6 Hz, 4H), 1.86 – 1.76 (m, 4H), 1.56 – 1.40 (m, 12H), 1.03 – 0.95 (m, 6H) ppm.

**$^{13}\text{C}\{^1\text{H}\}$  NMR** (126 MHz,  $\text{CDCl}_3$ ):  $\delta$  = 157.53 (s), 151.70 (s), 144.28 (s), 138.27 (s), 136.83 (s), 136.57 (s), 130.35 (d), 130.22 (d), 129.46 (s), 129.40 (d), 128.65 (d), 127.34 (d), 126.01 (s), 125.67 (d), 123.44 (d), 36.12 (t), 32.10 (t), 31.91 (t), 29.16 (t), 22.96 (t), 14.46 (q) ppm.

**$^{77}\text{Se}\{^1\text{H}\}$  NMR** (76 MHz,  $\text{CDCl}_3$ ):  $\delta$  = 456.16 ppm.

**HR-MS** (MALDI<sup>+</sup>):  $m/z$  calculated for  $[\text{C}_{48}\text{H}_{44}\text{N}_2\text{Se}_2]^+$ ,  $[\text{M}]^+$ : 808.1829, found: 808.1909.

**IR** (ATR):  $\nu$  [ $\text{cm}^{-1}$ ] = 2995, 2951, 2925, 2853, 1879, 1607, 1577, 1549, 1511, 1488, 1456, 1437, 1395, 1376, 1357, 1290, 1240, 1208, 1174, 1107, 1078, 1057, 1034, 949, 827, 736, 718, 641.

**UV-VIS** (DCM):  $\lambda_{\text{max}}$  [nm] = 270, 313, 343, 360, 376.

**Fluorescence** (DCM):  $\lambda_{\text{ex}}$  [nm] = 340,  $\lambda_{\text{max}}$  [nm] = 453.

**Quantum yield** (DCM):  $\Phi$  = <1 %.

**10ab**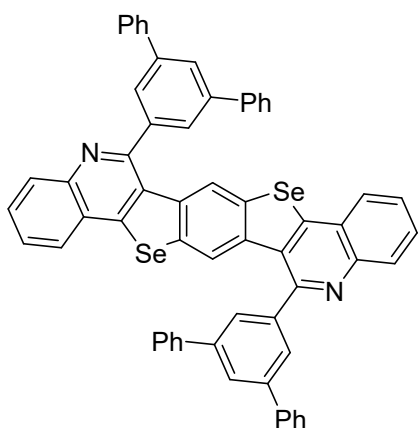

The reaction was carried out according to **GP5** with **7a** (100 mg, 214  $\mu\text{mol}$ , 1.00 eq.), 3,5-diphenylbenzaldehyde (166 mg, 643  $\mu\text{mol}$ , 3.00 eq.) and TFA (2.10 mg, 21.4  $\mu\text{mol}$ , 0.10 eq.) to yield a brown solid (87.0 mg, 92.3  $\mu\text{mol}$ , 43%).

**Mp:** 286-288 °C.

**$^1\text{H}$  NMR** (600 MHz,  $\text{CDCl}_3$ ):  $\delta$  = 8.27 (d,  $J$  = 8.3 Hz, 2H), 8.12 – 8.07 (m, 2H), 7.98 (s, 2H), 7.95 – 7.91 (m, 6H), 7.84 – 7.72 (m, 10H), 7.67 – 7.61 (m, 2H), 7.53 – 7.43 (m, 8H), 7.41 – 7.36 (m, 4H) ppm.

**$^{13}\text{C}\{^1\text{H}\}$  NMR** (151 MHz,  $\text{CDCl}_3$ ):  $\delta$  = 156.92 (s), 152.26 (s), 144.29 (s), 142.96 (s), 141.73 (s), 140.93 (s), 136.84 (s), 136.80 (s), 130.41 (d), 130.37 (d), 129.09 (d), 127.91 (s), 127.59 (d), 127.12 (d), 126.83 (d), 126.07 (s), 125.84 (d), 123.59 (d) ppm.

**$^{77}\text{Se}\{^1\text{H}\}$  NMR** (76 MHz,  $\text{CDCl}_3$ ):  $\delta$  = 460.26 ppm.

**HR-MS** (MALDI<sup>+</sup>):  $m/z$  calculated for  $[\text{C}_{60}\text{H}_{37}\text{N}_2\text{Se}_2]^+$ ,  $[\text{M}+\text{H}]^+$ : 945.1282, found: 945.1285.

**IR** (ATR):  $\nu$  [ $\text{cm}^{-1}$ ] = 3054, 3034, 1950, 1888, 1735, 1594, 1552, 1496, 1480, 1454, 1394, 1289, 1203, 1154, 1065, 1029, 882, 851, 753, 697, 642, 613.

**UV-VIS** (DCM):  $\lambda_{\text{max}}$  [nm] = 252, 318, 343, 362, 378.

**Fluorescence** (DCM):  $\lambda_{\text{ex}}$  [nm] = 360,  $\lambda_{\text{max}}$  [nm] = 466.

**Quantum yield** (DCM):  $\Phi$  = <1 %.



**10ba**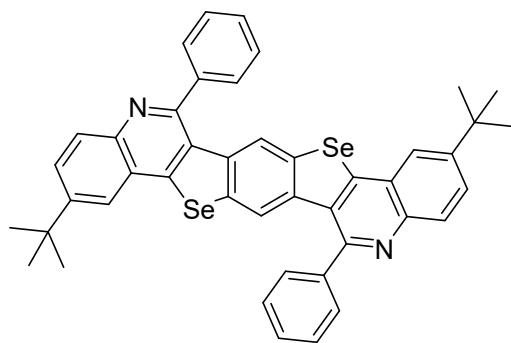

The reaction was carried out according to **GP5** with **7b** (100 mg, 214  $\mu\text{mol}$ , 1.00 eq.), benzaldehyde (55.0 mg, 519  $\mu\text{mol}$ , 3.00 eq.) and TFA (1.69 mg, 17.2  $\mu\text{mol}$ , 0.10 eq.) to yield a beige solid (61.0 mg, 81.3  $\mu\text{mol}$ , 47%).

**Mp:** >300 °C.

**$^1\text{H}$  NMR** (600 MHz,  $\text{CDCl}_3$ ):  $\delta$  = 8.19 (d,  $J$  = 8.7 Hz, 2H), 7.88 (dd,  $J$  = 8.7, 2.1 Hz, 2H), 7.80 (d,  $J$  = 2.0 Hz, 2H), 7.65 (s, 10H), 7.54 (s, 2H), 1.48 (s, 18H) ppm.

**$^{13}\text{C}\{^1\text{H}\}$  NMR** (151 MHz,  $\text{CDCl}_3$ ):  $\delta$  = 156.67 (s), 151.81 (s), 150.70 (s), 142.60 (s), 141.15 (s), 136.87 (s), 136.57 (s), 129.89 (d), 129.28 (d), 129.20 (d), 128.84 (d), 125.66 (s), 124.97 (s), 123.31 (d), 120.85 (d), 35.30 (s), 31.36 (q) ppm.

**$^{77}\text{Se}\{^1\text{H}\}$  NMR** (76 MHz,  $\text{CDCl}_3$ ):  $\delta$  = 453.38 ppm.

**HR-MS** (MALDI+):  $m/z$  calculated for  $[\text{C}_{44}\text{H}_{37}\text{N}_2\text{Se}_2]^+$ ,  $[\text{M}+\text{H}]^+$ : 753.1282, found: 753.1285.

**IR** (ATR):  $\nu$  [ $\text{cm}^{-1}$ ] = 3053, 2958, 2903, 2866, 1949, 1687, 1619, 1545, 1492, 1457, 1442, 1380, 1361, 1298, 1248, 1217, 1200, 1154, 1081, 1054, 1026, 947, 915, 866, 840, 791, 763, 738, 702, 661, 641, 614.

**UV-VIS** (DCM):  $\lambda_{\text{max}}$  [nm] = 276, 316, 344, 361, 380.

**Fluorescence** (DCM):  $\lambda_{\text{ex}}$  [nm] = 274,  $\lambda_{\text{max}}$  [nm] = 391.

**Quantum yield** (DCM):  $\Phi$  = 1 %.

**10bb**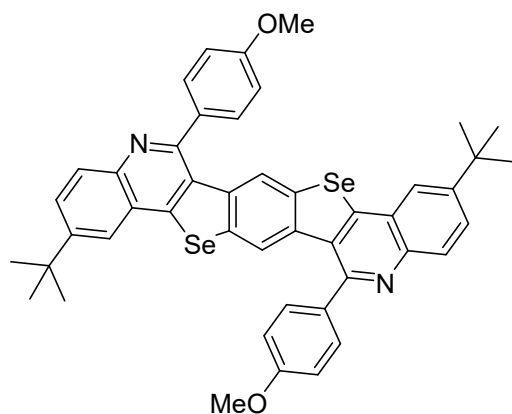

The reaction was carried out according to **GP5** with **7b** (100 mg, 214  $\mu\text{mol}$ , 1.00 eq.), 4-methoxybenzaldehyde (70.6 mg, 519  $\mu\text{mol}$ , 3.00 eq.) and TFA (1.69 mg, 17.2  $\mu\text{mol}$ , 0.10 eq.) to yield a dark brown solid (78.5 mg, 96.8  $\mu\text{mol}$ , 56%).

**Mp:** >300 °C.

**$^1\text{H}$  NMR** (600 MHz,  $\text{CDCl}_3$ ):  $\delta$  = 8.17 (d,  $J$  = 8.7 Hz, 2H), 7.86 (dd,  $J$  = 8.8, 2.1 Hz, 2H), 7.80 (d,  $J$  = 2.1 Hz, 2H), 7.77 (s, 2H), 7.62 (d,  $J$  = 8.3 Hz, 4H), 7.17 (d,  $J$  = 8.5 Hz, 4H), 4.01 (s, 6H), 1.48 (s, 18H) ppm.

**$^{13}\text{C}\{^1\text{H}\}$  NMR** (151 MHz,  $\text{CDCl}_3$ ):  $\delta$  = 160.49 (s), 156.48 (s), 151.79 (s), 150.52 (s), 142.70 (s), 137.05 (s), 136.51 (s), 133.64 (s), 130.31 (d), 129.82 (d), 129.35 (s), 129.20 (d), 125.54 (s), 123.39 (d), 120.82 (d), 114.62 (d), 55.76 (q), 35.28 (s), 31.37 (q) ppm.

**$^{77}\text{Se}\{^1\text{H}\}$  NMR** (76 MHz,  $\text{CDCl}_3$ ):  $\delta$  = 452.35 ppm.

**HR-MS** (MALDI<sup>+</sup>):  $m/z$  calculated for  $[\text{C}_{46}\text{H}_{41}\text{N}_2\text{O}_2\text{Se}_2]^+$ ,  $[\text{M}+\text{H}]^+$ : 813.1493, found: 813.1488.

**IR** (ATR):  $\nu$  [ $\text{cm}^{-1}$ ] = 3046, 2958, 2904, 2866, 2835, 1729, 1608, 1547, 1511, 1489, 1456, 1426, 1390, 1361, 1291, 1244, 1216, 1173, 1108, 1079, 1055, 1030, 945, 871, 827, 804, 733, 700, 648, 622.

**UV-VIS** (DCM):  $\lambda_{\text{max}}$  [nm] = 275, 310, 343, 359, 379.

**Fluorescence** (DCM):  $\lambda_{\text{ex}}$  [nm] = 340,  $\lambda_{\text{max}}$  [nm] = 393.

**Quantum yield** (DCM):  $\Phi$  = <1 %.

**10bc**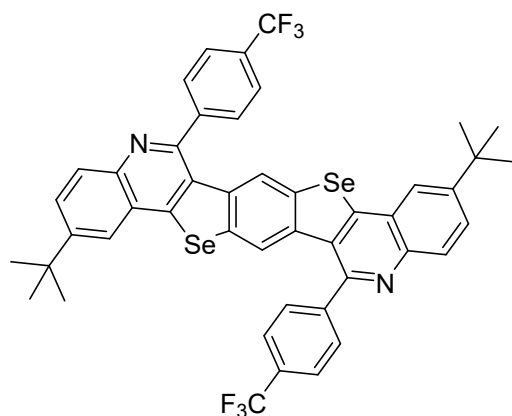

The reaction was carried out according to **GP5** with **7b** (100 mg, 214  $\mu\text{mol}$ , 1.00 eq.), 4-(trifluoromethyl)benzaldehyde (90.3 mg, 519  $\mu\text{mol}$ , 3.00 eq.) and TFA (1.69 mg, 17.2  $\mu\text{mol}$ , 0.10 eq.) to yield a beige solid (42.9 mg, 48.4  $\mu\text{mol}$ , 28%).

**Mp:** >300 °C.

**$^1\text{H}$  NMR** (600 MHz,  $\text{CDCl}_3$ ):  $\delta$  = 8.17 (d,  $J$  = 8.7 Hz, 2H), 7.93 (d,  $J$  = 7.7 Hz, 2H), 7.91 (dd,  $J$  = 8.8, 2.1 Hz, 2H), 7.83 (ddd,  $J$  = 4.2, 2.1, 1.4 Hz, 8H), 7.60 (s, 2H), 1.49 (s, 18H) ppm.

**$^{13}\text{C}\{^1\text{H}\}$  NMR** (151 MHz,  $\text{CDCl}_3$ ):  $\delta$  = 154.85 (s), 152.32 (s), 151.35 (s), 144.76 (s), 142.55 (s), 136.68 (s), 136.59 (s), 129.89 (d), 129.71 (d), 129.58 (d), 128.60 (s), 126.28 (d), 125.73 (s), 124.31 (q), 123.02 (d), 120.91 (d), 35.39 (s), 31.36 (q) ppm.

**$^{19}\text{F}\{^1\text{H}\}$  NMR** (282 MHz,  $\text{CDCl}_3$ ):  $\delta$  = -62.41 ppm.

**$^{77}\text{Se}\{^1\text{H}\}$  NMR** (76 MHz,  $\text{CDCl}_3$ ):  $\delta$  = 458.80 ppm.

**HR-MS** (MALDI+):  $m/z$  calculated for  $[\text{C}_{46}\text{H}_{34}\text{F}_6\text{N}_2\text{Se}_2]^+$ ,  $[\text{M}]^+$ : 888.0951, found: 888.1007.

**IR** (ATR):  $\nu$  [ $\text{cm}^{-1}$ ] = 3060, 2975, 2958, 2907, 2868, 1615, 1547, 1488, 1457, 1406, 1379, 1365, 1324, 1248, 1217, 1159, 1105, 1079, 1065, 1016, 947, 863, 842, 826, 791, 746, 693, 668, 644, 623.

**UV-VIS** (DCM):  $\lambda_{\text{max}}$  [nm] = 278, 322, 344, 363, 377.

**Fluorescence** (DCM):  $\lambda_{\text{ex}}$  [nm] = 340,  $\lambda_{\text{max}}$  [nm] = 393.

**Quantum yield** (DCM):  $\Phi$  = <1 %.

**10bd**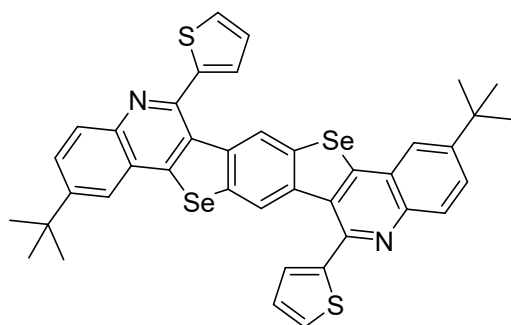

The reaction was carried out according to **GP5** with **7b** (100 mg, 214  $\mu\text{mol}$ , 1.00 eq.), thiophen-2-carbaldehyde (58.2 mg, 519  $\mu\text{mol}$ , 3.00 eq.) and TFA (1.69 mg, 17.2  $\mu\text{mol}$ , 0.10 eq.) to yield a black solid (96.2 mg, 126  $\mu\text{mol}$ , 73%).

**Mp:** >300 °C.

**$^1\text{H}$  NMR** (600 MHz,  $\text{CDCl}_3$ ):  $\delta$  = 8.19 (d,  $J$  = 8.7 Hz, 2H), 7.88 (dd,  $J$  = 8.8, 2.1 Hz, 2H), 7.82 (s, 2H), 7.81 (d,  $J$  = 2.1 Hz, 2H), 7.66 (dd,  $J$  = 5.2, 1.2 Hz, 2H), 7.44 (dd,  $J$  = 3.4, 1.2 Hz, 2H), 7.32 (dd,  $J$  = 5.2, 3.4 Hz, 2H), 1.48 (s, 18H) ppm.

**$^{13}\text{C}\{^1\text{H}\}$  NMR** (151 MHz,  $\text{CDCl}_3$ ):  $\delta$  = 151.98 (s), 151.17 (s), 149.69 (s), 142.47 (s), 141.81 (s), 136.82 (s), 136.63 (s), 130.01 (s), 129.90 (d), 129.48 (d), 128.20 (d), 127.64 (d), 127.49 (d), 125.85 (s), 123.11 (d), 120.82 (d), 35.35 (s), 31.33 (q) ppm.

**$^{77}\text{Se}\{^1\text{H}\}$  NMR** (76 MHz,  $\text{CDCl}_3$ ):  $\delta$  = 455.03 ppm.

**HR-MS** (MALDI<sup>+</sup>):  $m/z$  calculated for  $[\text{C}_{40}\text{H}_{33}\text{N}_2\text{S}_2\text{Se}_2]^+$ ,  $[\text{M}+\text{H}]^+$ : 765.0410, found: 765.0410.

**IR** (ATR):  $\nu$  [ $\text{cm}^{-1}$ ] = 3069, 2956, 2903, 2865, 1729, 1617, 1546, 1478, 1461, 1435, 1393, 1362, 1200, 1163, 1064, 977, 931, 848, 832, 696, 644.

**UV-VIS** (DCM):  $\lambda_{\text{max}}$  [nm] = 273, 319, 341, 364.

**Fluorescence** (DCM):  $\lambda_{\text{ex}}$  [nm] = 340,  $\lambda_{\text{max}}$  [nm] = 435.

**Quantum yield** (DCM):  $\Phi$  = <1 %.

**10be**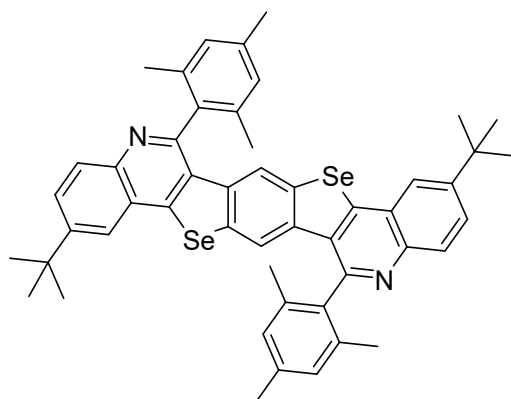

The reaction was carried out according to **GP5** with **7b** (100 mg, 214  $\mu\text{mol}$ , 1.00 eq.), 2,4,6-trimethylbenzaldehyde (76.9 mg, 519  $\mu\text{mol}$ , 3.00 eq.) and TFA (1.69 mg, 17.2  $\mu\text{mol}$ , 0.10 eq.) to yield a light brown solid (26.0 mg, 31.1  $\mu\text{mol}$ , 18%).

**Mp:** >300 °C.

**$^1\text{H}$  NMR** (400 MHz,  $\text{CDCl}_3$ ):  $\delta$  = 8.22 (d,  $J$  = 8.7 Hz, 2H), 7.89 (dd,  $J$  = 8.8, 2.1 Hz, 2H), 7.86 – 7.84 (m, 2H), 7.32 (s, 2H), 7.12 (s, 2H), 2.52 (s, 6H), 1.93 (s, 12H), 1.50 (s, 18H) ppm.

**$^{13}\text{C}\{^1\text{H}\}$  NMR** (101 MHz,  $\text{CDCl}_3$ ):  $\delta$  = 156.59 (s), 151.48 (s), 150.54 (s), 143.37 (s), 138.60 (s), 137.38 (s), 137.09 (s), 136.84 (s), 135.91 (s), 129.97 (d), 129.16 (d), 128.95 (d), 125.60 (s), 121.91 (d), 120.93 (d), 35.32 (s), 31.43 (q), 21.57 (q), 19.89 (q) ppm.

**$^{77}\text{Se}\{^1\text{H}\}$  NMR** (76 MHz,  $\text{CDCl}_3$ ):  $\delta$  = 452.99 ppm.

**HR-MS** (MALDI+):  $m/z$  calculated for  $[\text{C}_{50}\text{H}_{49}\text{N}_2\text{Se}_2]^+$ ,  $[\text{M}+\text{H}]^+$ : 837.2221, found: 837.2221.

**IR** (ATR):  $\nu$  [ $\text{cm}^{-1}$ ] = 3053, 2961, 2916, 2866, 1742, 1612, 1545, 1492, 1460, 1378, 1360, 1294, 1251, 1218, 1165, 1101, 1073, 1051, 1032, 938, 875, 847, 834, 761, 743, 693, 657, 646.

**UV-VIS** (DCM):  $\lambda_{\text{max}}$  [nm] = 276, 316, 344, 363, 378.

**Fluorescence** (DCM):  $\lambda_{\text{ex}}$  [nm] = 340,  $\lambda_{\text{max}}$  [nm] = 389.

**Quantum yield** (DCM):  $\Phi$  = 1 %.

**10ca**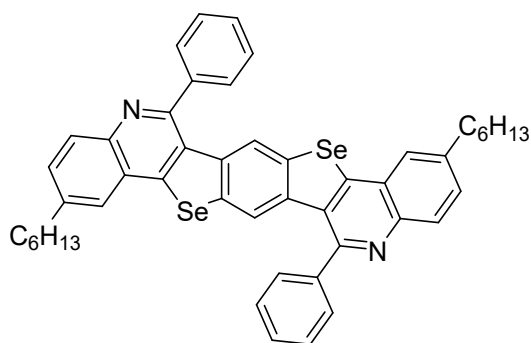

The reaction was carried out according to **GP5** with **7c** (100 mg, 158  $\mu\text{mol}$ , 1.00 eq.), benzaldehyde (50.2 mg, 473  $\mu\text{mol}$ , 3.00 eq.) and TFA (1.54 mg, 15.8  $\mu\text{mol}$ , 0.10 eq.) to yield a brown solid (73.7 mg, 91.3  $\mu\text{mol}$ , 58%).

**Mp:** >300 °C.

**$^1\text{H}$  NMR** (600 MHz,  $\text{CDCl}_3$ ):  $\delta$  = 8.15 (d,  $J$  = 8.5 Hz, 2H), 7.68 – 7.64 (m, 12H), 7.62 (dd,  $J$  = 8.4, 1.9 Hz, 2H), 7.53 (s, 2H), 2.89 – 2.82 (m, 4H), 1.80 – 1.69 (m, 4H), 1.45 – 1.30 (m, 12H), 0.95 – 0.86 (m, 6H) ppm.

**$^{13}\text{C}\{^1\text{H}\}$  NMR** (151 MHz,  $\text{CDCl}_3$ ):  $\delta$  = 156.44 (s), 151.25 (s), 142.83 (s), 142.62 (s), 141.14 (s), 136.82 (s), 136.56 (s), 131.83 (d), 130.08 (d), 129.27 (d), 129.17 (d), 128.87 (d), 125.98 (s), 124.16 (d), 123.31 (d), 36.20 (t), 31.86 (t), 31.41 (t), 29.13 (t), 22.75 (t), 14.27 (q) ppm.

**$^{77}\text{Se}\{^1\text{H}\}$  NMR** (76 MHz,  $\text{CDCl}_3$ ):  $\delta$  = 454.74 ppm.

**HR-MS** (EI+):  $m/z$  calculated for  $[\text{C}_{48}\text{H}_{45}\text{N}_2\text{Se}_2]^+$ ,  $[\text{M}+\text{H}]^+$ : 809.1908, found: 809.2031.

**IR** (ATR):  $\nu$  [ $\text{cm}^{-1}$ ] = 3056, 2952, 2927, 2852, 1913, 1724, 1687, 1620, 1547, 1486, 1455, 1439, 1376, 1357, 1294, 1272, 1205, 1078, 1057, 1026, 949, 908, 865, 849, 829, 808, 765, 742, 727, 694, 651, 630, 609.

**UV-VIS** (DCM):  $\lambda_{\text{max}}$  [nm] = 274, 317, 344, 362, 381.

**Fluorescence** (DCM):  $\lambda_{\text{ex}}$  [nm] = 340,  $\lambda_{\text{max}}$  [nm] = 433.

**Quantum yield** (DCM):  $\Phi$  = 1 %.

**10cb**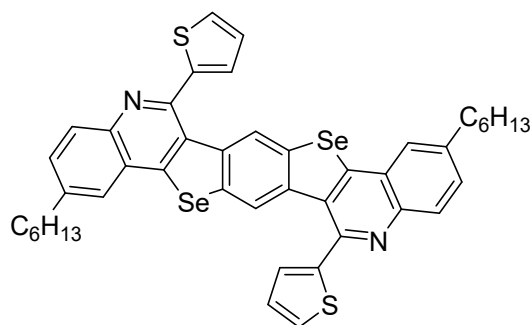

The reaction was carried out according to **GP5** with **7c** (100 mg, 158  $\mu\text{mol}$ , 1.00 eq.), thiophen-2-carbaldehyde (53.0 mg, 473  $\mu\text{mol}$ , 3.00 eq.) and TFA (1.54 mg, 15.8  $\mu\text{mol}$ , 0.10 eq.) to yield a black solid (52.0 mg, 63.5  $\mu\text{mol}$ , 40%).

**Mp:** >300 °C.

**$^1\text{H}$  NMR** (600 MHz,  $\text{CDCl}_3$ ):  $\delta$  = 8.16-8.15 (d,  $J$  = 8.4 Hz, 2H), 7.83 (s, 2H), 7.67-7.66 (dd,  $J$  = 5.2, 1.2 Hz, 2H), 7.64-7.62 (dd,  $J$  = 8.5 Hz, 1.9 Hz, 2H), 7.45,-7.43 (m, 2H), 7.33-7.31 (m, 2H), 2.87-2.85 (t,  $J$  = 7.8 Hz, 4H) , 1.79-1.74 (m, 4H), 1.42-1.25 (m, 12H), 0.92-0.89 (m, 6H) ppm.

**$^{13}\text{C}\{^1\text{H}\}$  NMR** (150 MHz,  $\text{CDCl}_3$ ):  $\delta$  = 151.37 (s), 149.53 (s), 143.08 (s), 142.76 (s), 141.95 (s), 136.78 (s), 136.62 (s), 131.98 (d), 130.15 (d), 129.95 (s), 128.20 (d), 127.63 (d), 127.48 (d), 126.16 (s), 124.14 (d), 123.11 (d), 36.23 (t), 31.86 (t), 31.36 (t), 29.13 (t), 22.76 (t), 14.27 (q) ppm.

**$^{77}\text{Se}\{^1\text{H}\}$  NMR** (76 MHz,  $\text{CDCl}_3$ ):  $\delta$  = 456.09 ppm.

**HR-MS** (MALDI<sup>+</sup>):  $m/z$  calculated for  $[\text{C}_{44}\text{H}_{41}\text{N}_2\text{S}_2\text{Se}_2]^+$ ,  $[\text{M}+\text{H}]^+$ : 821.1036, found: 821.1057.

**IR** (ATR):  $\nu$  [ $\text{cm}^{-1}$ ] = 3068, 2952, 2926, 2852, 1913, 1730, 1619, 1548, 1485, 1455, 1376, 1289, 1234, 1190, 1063, 935, 867, 850, 826, 737, 690, 625.

**UV-VIS** (DCM):  $\lambda_{\text{max}}$  [nm] = 233, 275, 318, 343, 364.

**Fluorescence** (DCM):  $\lambda_{\text{ex}}$  [nm] = 340,  $\lambda_{\text{max}}$  [nm] = 408.

**Quantum yield** (DCM):  $\Phi$  = <1 %.

**10cc**

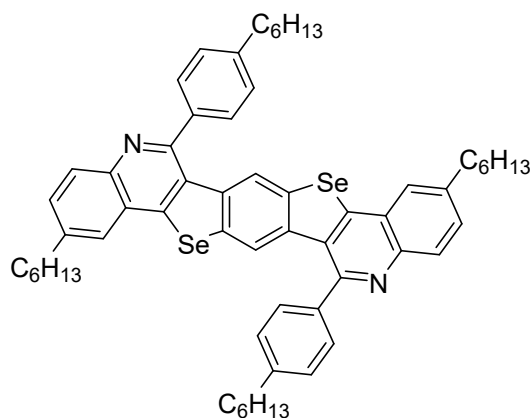

The reaction was carried out according to **GP5** with **7c** (100 mg, 158  $\mu$ mol, 1.00 eq.), 4-hexylbenzaldehyde (89.9 mg, 473  $\mu$ mol, 3.00 eq.) and TFA (1.54 mg, 15.8  $\mu$ mol, 0.10 eq.) to yield a light brown solid (20.0 mg, 20.5  $\mu$ mol, 13%).

**Mp:** >300 °C.

**<sup>1</sup>H NMR** (600 MHz, CDCl<sub>3</sub>):  $\delta$  = 8.15 (d, *J* = 8.4 Hz, 2H), 7.63 (s, 2H), 7.61 (dd, *J* = 8.5, 1.9 Hz, 2H), 7.55 (d, *J* = 8.0 Hz, 4H), 7.52 (s, 2H), 7.45 (d, *J* = 8.1 Hz, 4H), 2.84 (t, *J* = 7.7 Hz, 8H), 1.84 – 1.78 (m, 4H), 1.78 – 1.72 (m, 4H), 1.54 – 1.44 (m, 12H), 1.43 – 1.30 (m, 12H), 1.04 – 0.95 (m, 6H), 0.94 – 0.84 (m, 6H) ppm.

**<sup>13</sup>C{<sup>1</sup>H} NMR** (151 MHz, CDCl<sub>3</sub>):  $\delta$  = 156.67 (s), 151.07 (s), 144.10 (s), 142.85 (s), 142.48 (s), 138.39 (s), 136.87 (s), 136.51 (s), 131.73 (d), 130.05 (d), 129.40 (s), 129.34 (d), 128.70 (d), 125.95 (s), 124.12 (d), 123.37 (d), 36.23 (t), 36.14 (t), 32.17 (t), 31.92 (t), 31.86 (t), 31.49 (t), 29.16 (t), 22.98 (t), 22.76 (t), 14.50 (q), 14.26 (q) ppm.

**<sup>77</sup>Se{<sup>1</sup>H} NMR** (76 MHz, CDCl<sub>3</sub>):  $\delta$  = 452.82 ppm.

**HR-MS** (MALDI+): *m/z* calculated for [C<sub>60</sub>H<sub>69</sub>N<sub>2</sub>Se<sub>2</sub>]<sup>+</sup>, [M+H]<sup>+</sup>: 977.3786, found: 977.3784.

**IR** (ATR):  $\nu$  [cm<sup>-1</sup>] = 2954, 2922, 2853, 1920, 1612, 1547, 1514, 1487, 1455, 1396, 1377, 1294, 1273, 1210, 1181, 1140, 1116, 1077, 1056, 1020, 949, 871, 824, 789, 728, 644.

**UV-VIS** (DCM):  $\lambda_{\text{max}}$  [nm] = 274, 317, 344, 361, 381.

**Fluorescence** (DCM):  $\lambda_{\text{ex}}$  [nm] = 340,  $\lambda_{\text{max}}$  [nm] = 392.

**Quantum yield** (DCM):  $\Phi$  = 1 %.



## 11ba

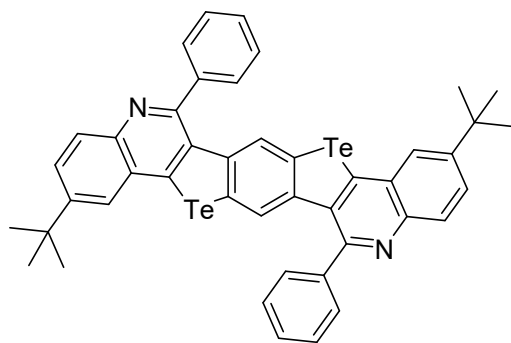

The reaction was carried out according to **GP5** with **8** (50 mg, 74.0  $\mu\text{mol}$ , 1.00 eq.), benzaldehyde (23.6 mg, 222  $\mu\text{mol}$ , 3.00 eq.) and TFA (725  $\mu\text{g}$ , 7.40  $\mu\text{mol}$ , 0.10 eq.) to yield an orange solid (29.0 mg, 34.2  $\mu\text{mol}$ , 46%).

**Mp:** >300 °C.

**$^1\text{H}$  NMR** (400 MHz,  $\text{CDCl}_3$ ):  $\delta$  = 8.17 (d,  $J$  = 8.8 Hz, 2H), 7.88 (dd,  $J$  = 8.8, 2.1 Hz, 2H), 7.62 (s, 10H), 7.44 (d,  $J$  = 2.0 Hz, 2H), 7.38 (s, 2H), 1.46 (s, 18H) ppm.

**$^{13}\text{C}\{^1\text{H}\}$  NMR** (100 MHz,  $\text{CDCl}_3$ ):  $\delta$  = 157.18 (s), 151.07 (s), 147.72 (s), 142.52 (s), 141.07 (s), 135.74 (s), 132.62 (d), 130.14 (s), 129.70 (s), 129.47 (d), 129.25 (d), 129.05 (d), 128.97 (d), 126.58 (d), 125.59 (s), 123.95 (d), 35.21 (s), 31.31 (q) ppm.

**HR-MS** (MALDI<sup>+</sup>):  $m/z$  calculated for  $[\text{C}_{44}\text{H}_{36}\text{N}_2\text{Te}_2]^+$ ,  $[\text{M}]^+$ : 850.0980, found: 850.0997.

**IR** (ATR):  $\nu$  [ $\text{cm}^{-1}$ ] = 3046, 2957, 2903, 2865, 1682, 1617, 1546, 1487, 1442, 1372, 1288, 1241, 1197, 1081, 1026, 942, 872, 833, 789, 769, 755, 701, 655, 635, 614.

**UV-VIS** (DCM):  $\lambda_{\text{max}}$  [nm] = 289, 325, 339, 359, 409.

**Fluorescence** (DCM):  $\lambda_{\text{ex}}$  [nm] = 340,  $\lambda_{\text{max}}$  [nm] = 468.

**Quantum yield** (DCM):  $\Phi$  = <1 %.

Due to the low solubility of the product, no signal in the  $^{125}\text{Te}\{^1\text{H}\}$  NMR could be obtained. As a substitute, the expected molecular structure was confirmed *via* X-ray single crystal analysis (see Chapter 5, Table S10).

## 2 NMR Spectra

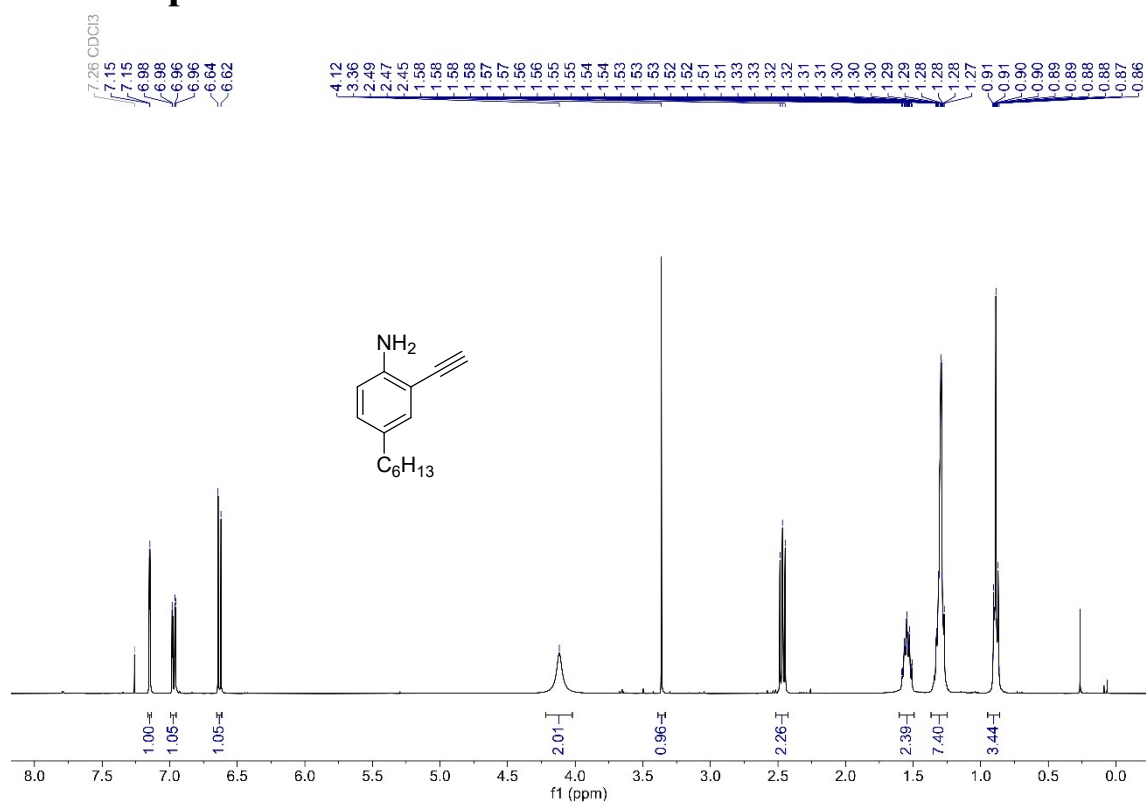

Figure S1.  $^1\text{H}$  NMR spectrum (400 MHz,  $\text{CDCl}_3$ ) of **3c**.

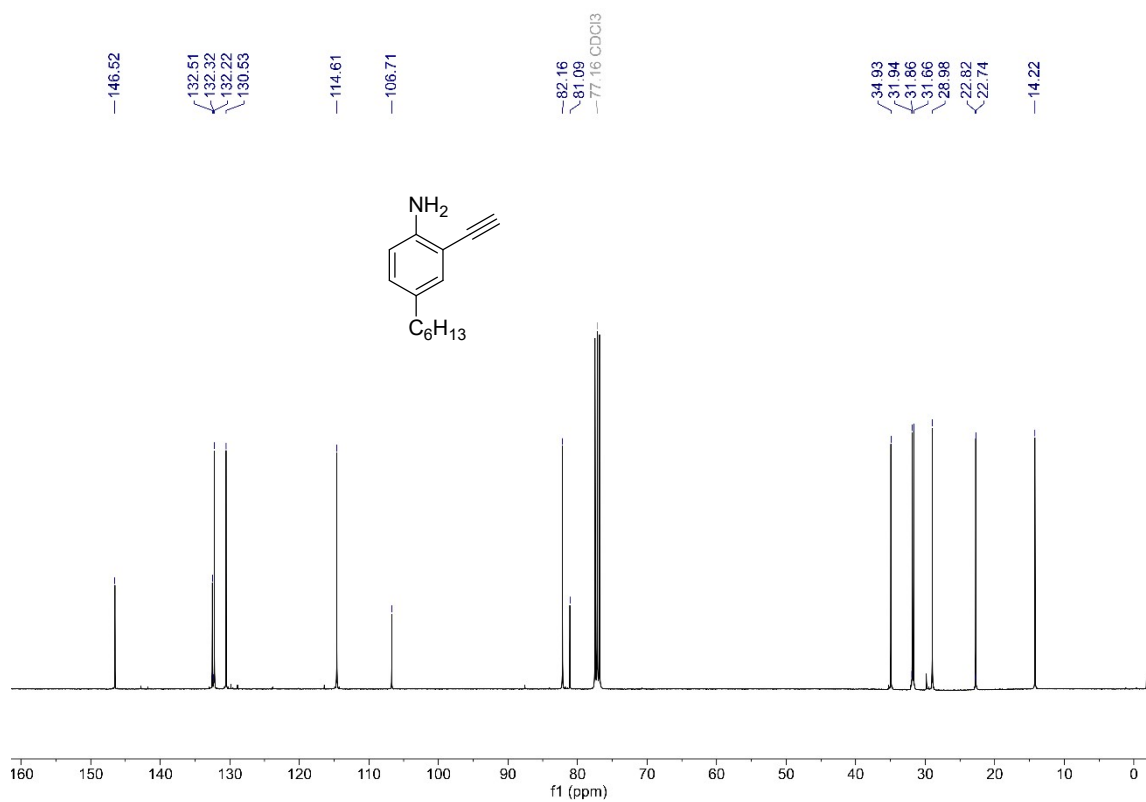

Figure S2.  $^{13}\text{C}$   $\{^1\text{H}\}$  NMR spectrum (101 MHz,  $\text{CDCl}_3$ ) of **3c**.

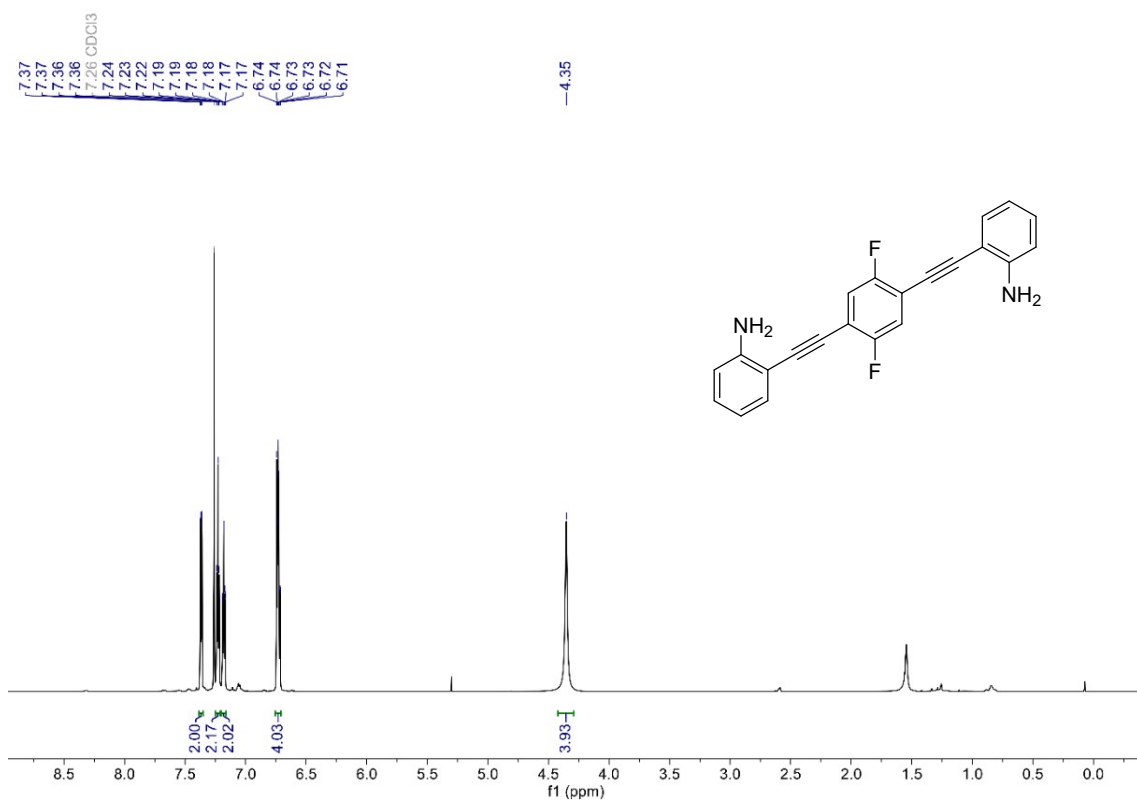

Figure S3.  $^1\text{H}$  NMR spectrum (700 MHz,  $\text{CDCl}_3$ ) of 5a.

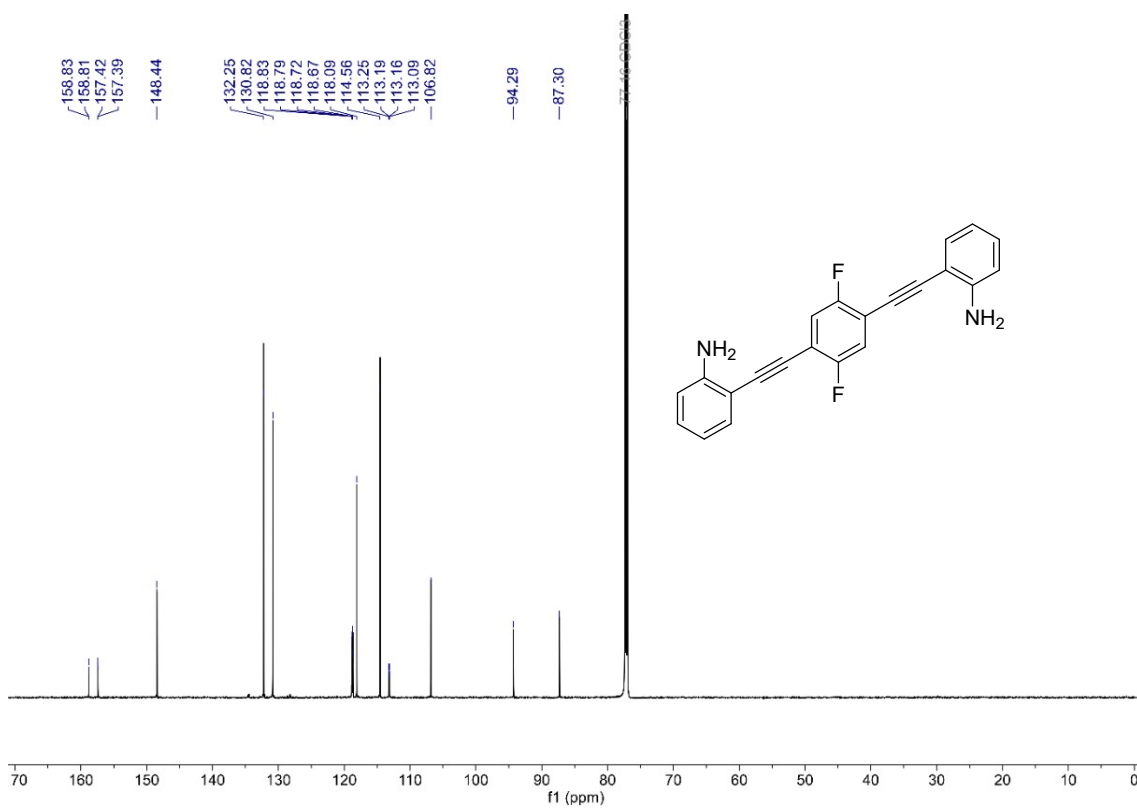

Figure S4.  $^{13}\text{C}$   $\{^1\text{H}\}$  NMR spectrum (176 MHz,  $\text{CDCl}_3$ ) of 5a.

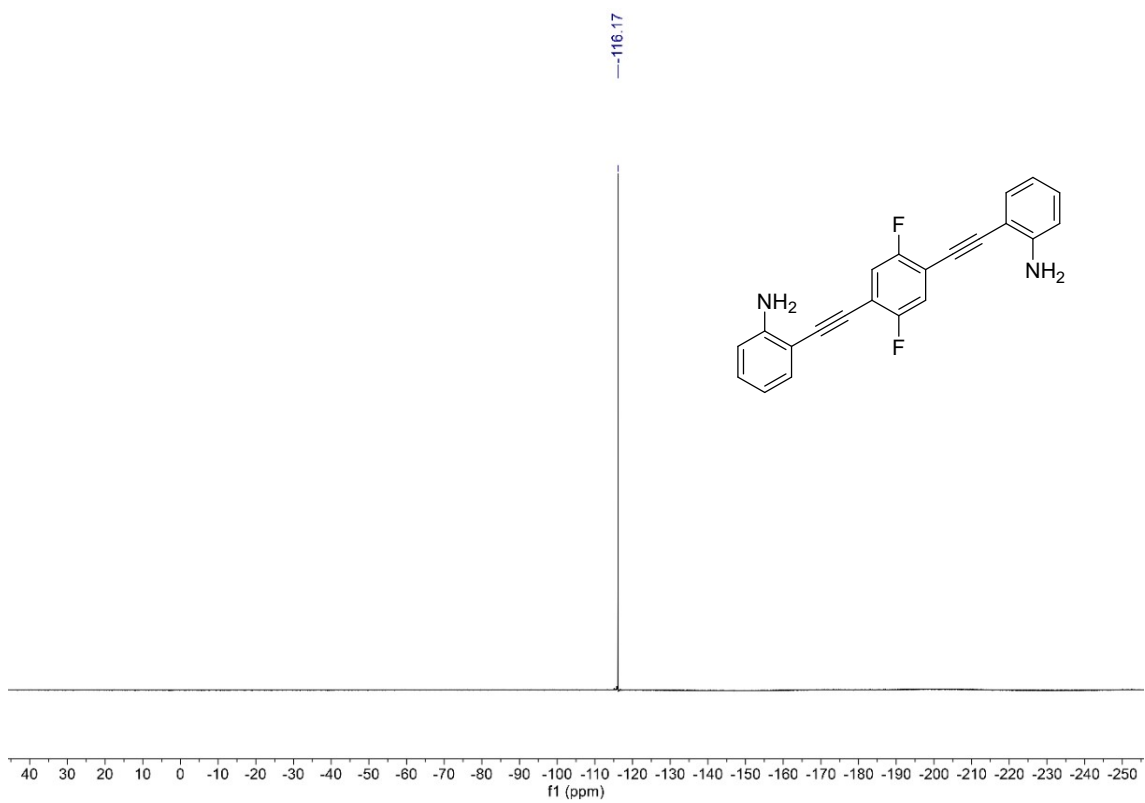

Figure S5.  $^{19}\text{F}$   $\{^1\text{H}\}$  NMR spectrum (283 MHz,  $\text{CDCl}_3$ ) of 5a.

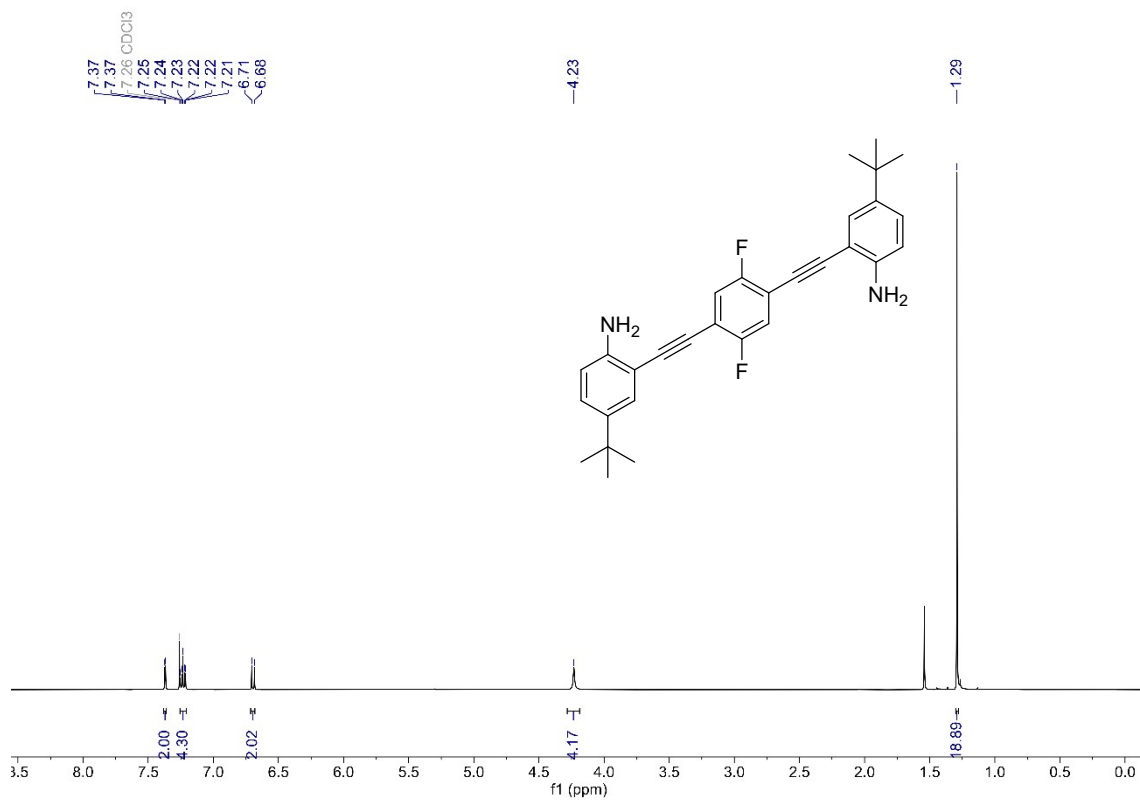

Figure S6.  $^1\text{H}$  NMR spectrum (400 MHz,  $\text{CDCl}_3$ ) of 5b.

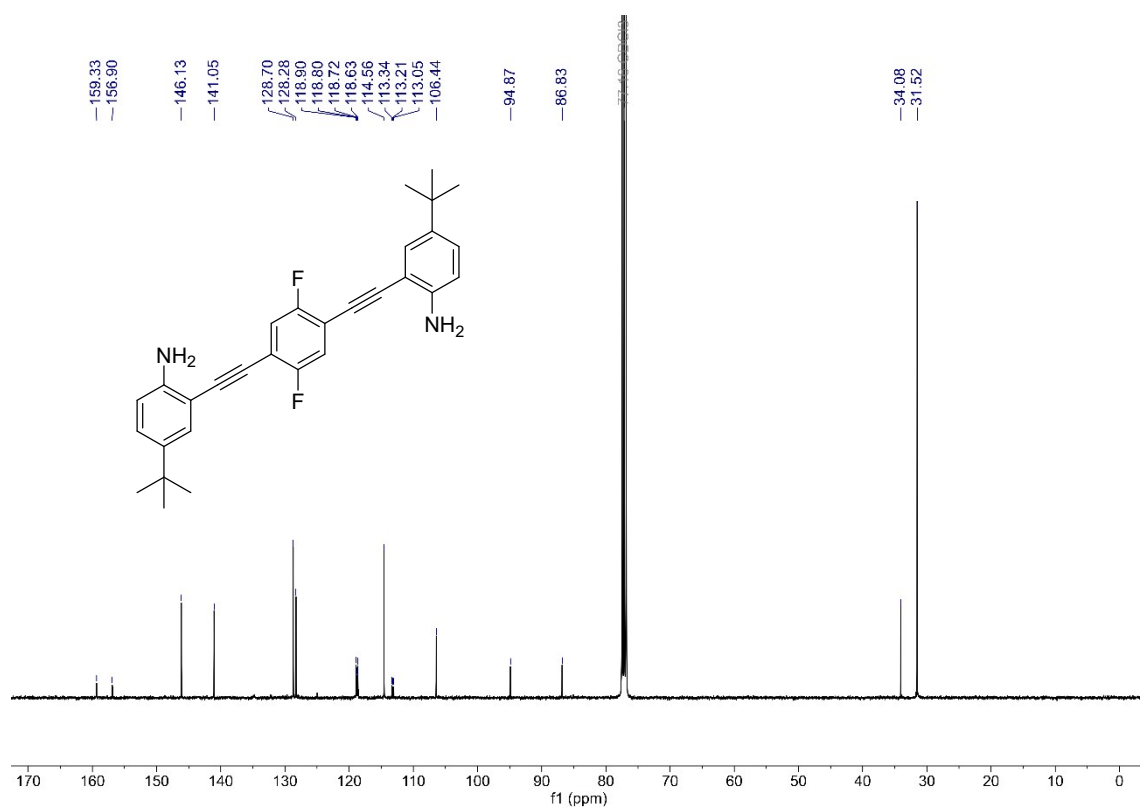

Figure S7.  $^{13}\text{C}$  { $^1\text{H}$ } NMR spectrum (101 MHz,  $\text{CDCl}_3$ ) of 5b.

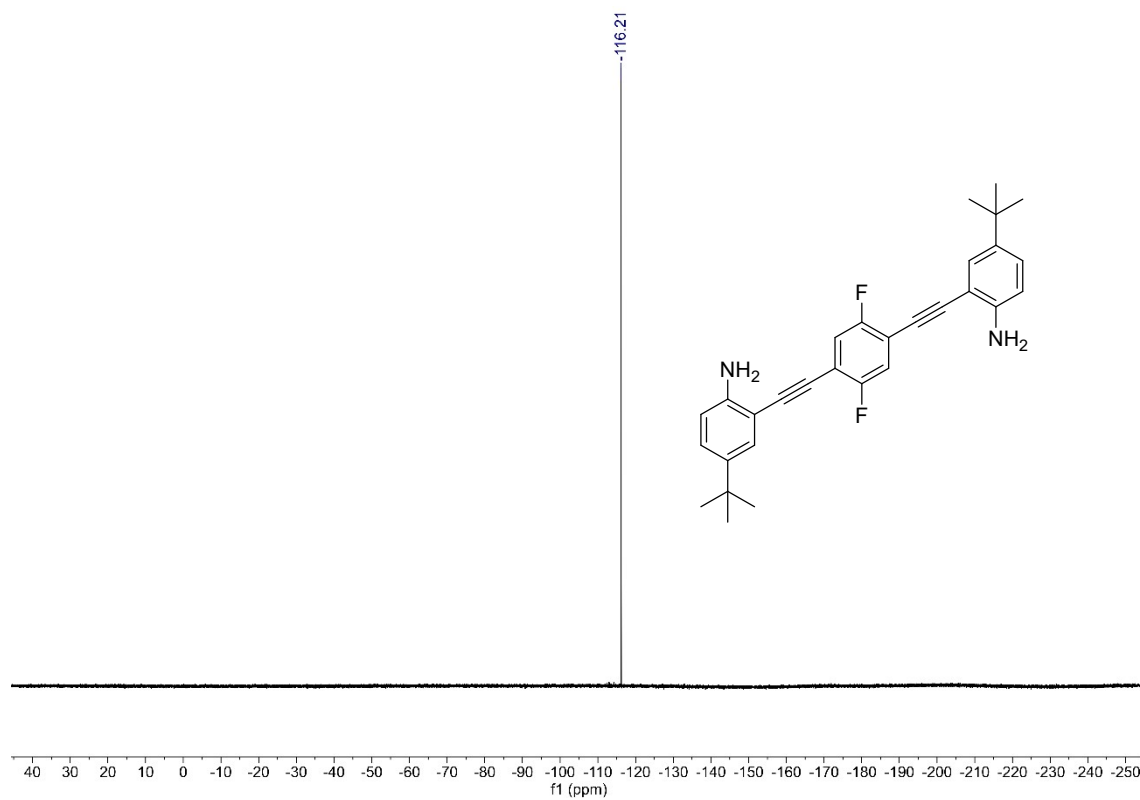

Figure S8.  $^{19}\text{F}$  { $^1\text{H}$ } NMR spectrum (283 MHz,  $\text{CDCl}_3$ ) of 5b.

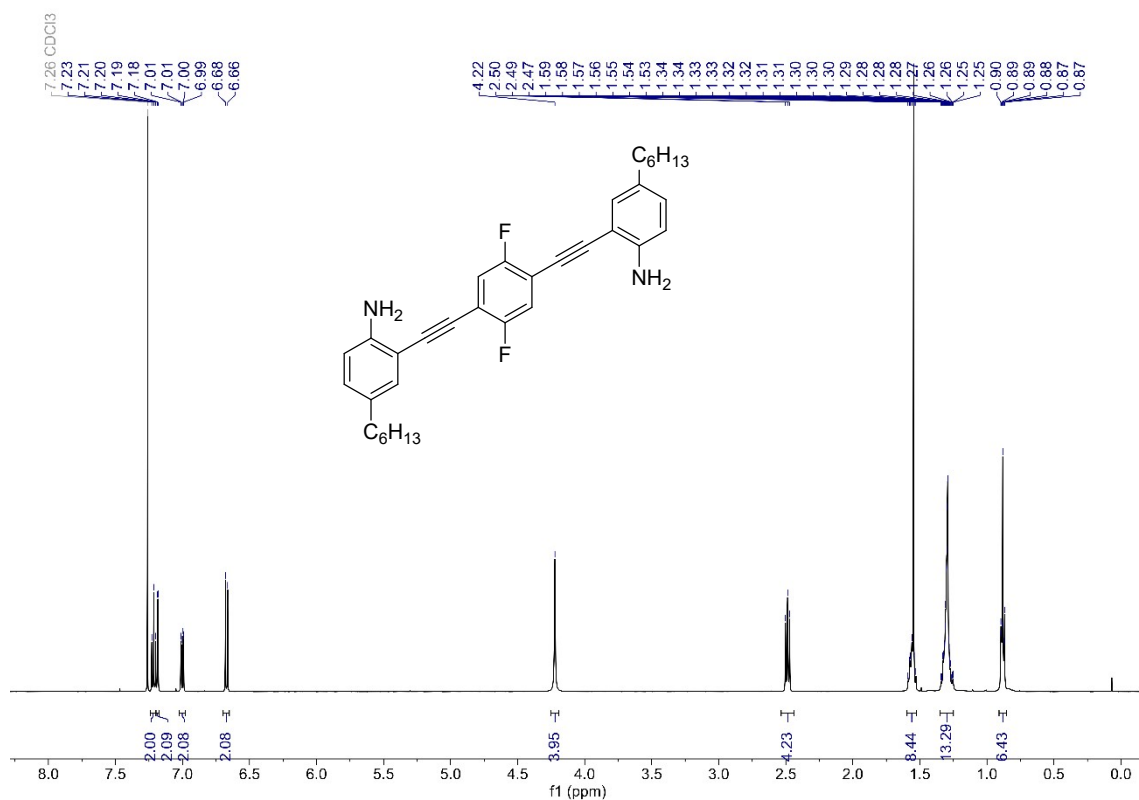

**Figure S9.**  $^1\text{H}$  NMR spectrum (500 MHz,  $\text{CDCl}_3$ ) of **5c**.

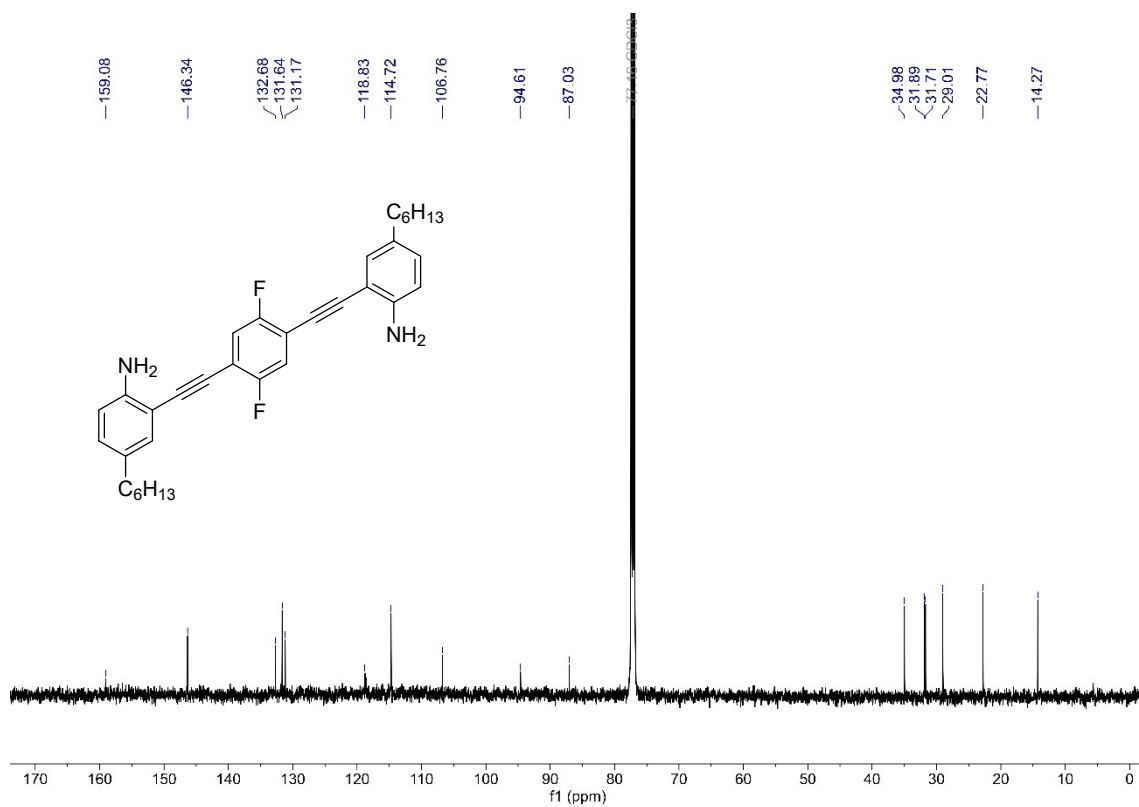

**Figure S10.**  $^{13}\text{C}$   $\{^1\text{H}\}$  NMR spectrum (126 MHz,  $\text{CDCl}_3$ ) of **5c**.

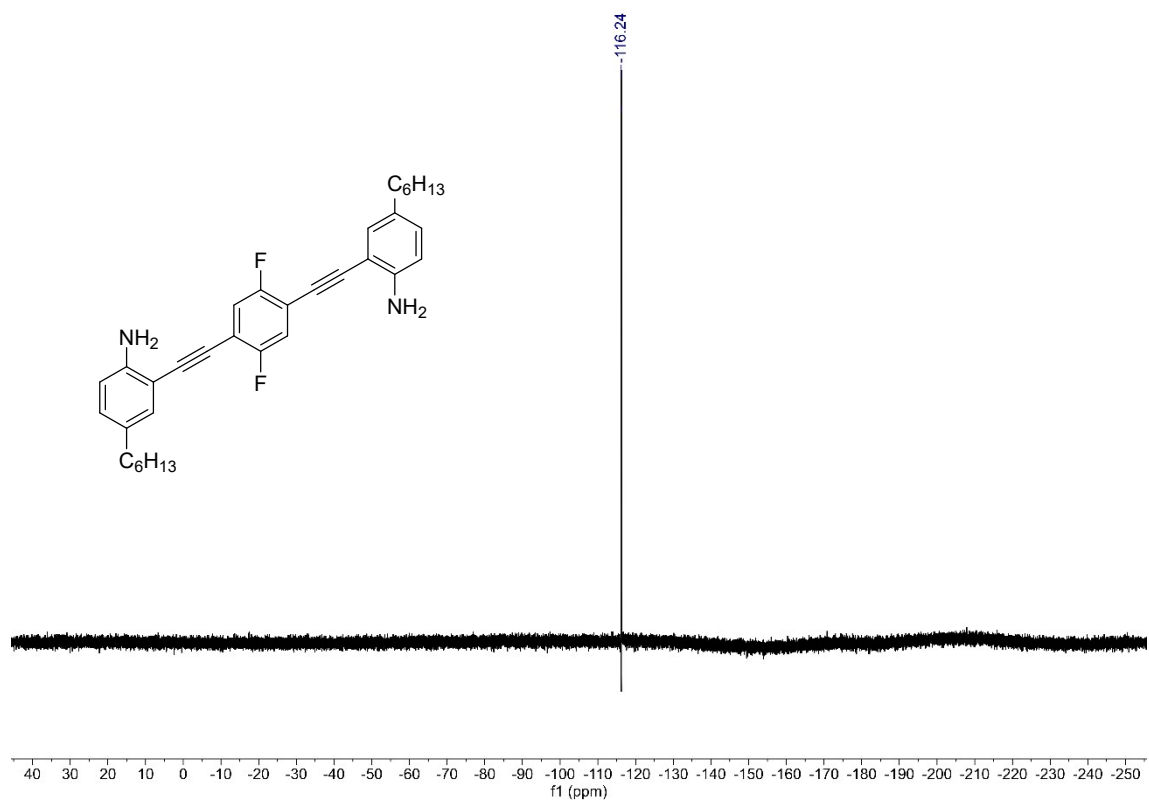

Figure S11.  $^{19}\text{F}\{^1\text{H}\}$  NMR spectrum (283 MHz,  $\text{CDCl}_3$ ) of 5c.

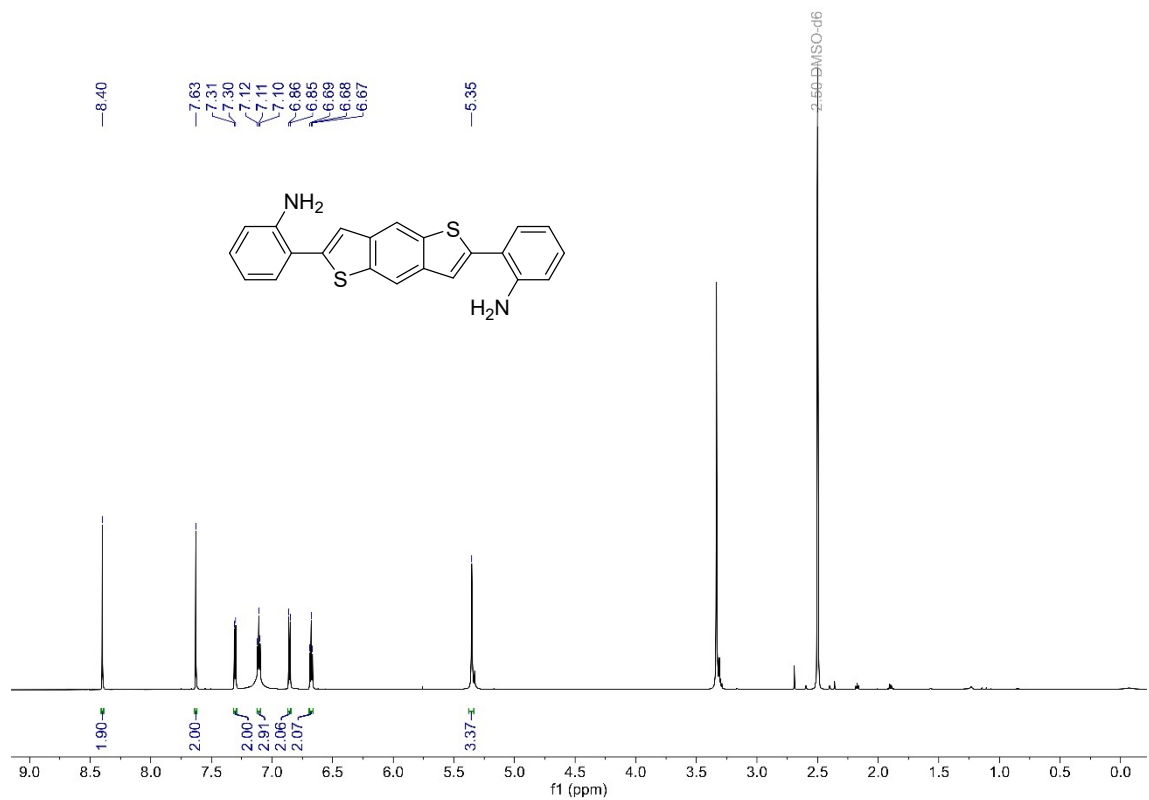

Figure S12.  $^1\text{H}$  NMR spectrum (700 MHz,  $\text{DMSO-d}_6$ ) of 6a.

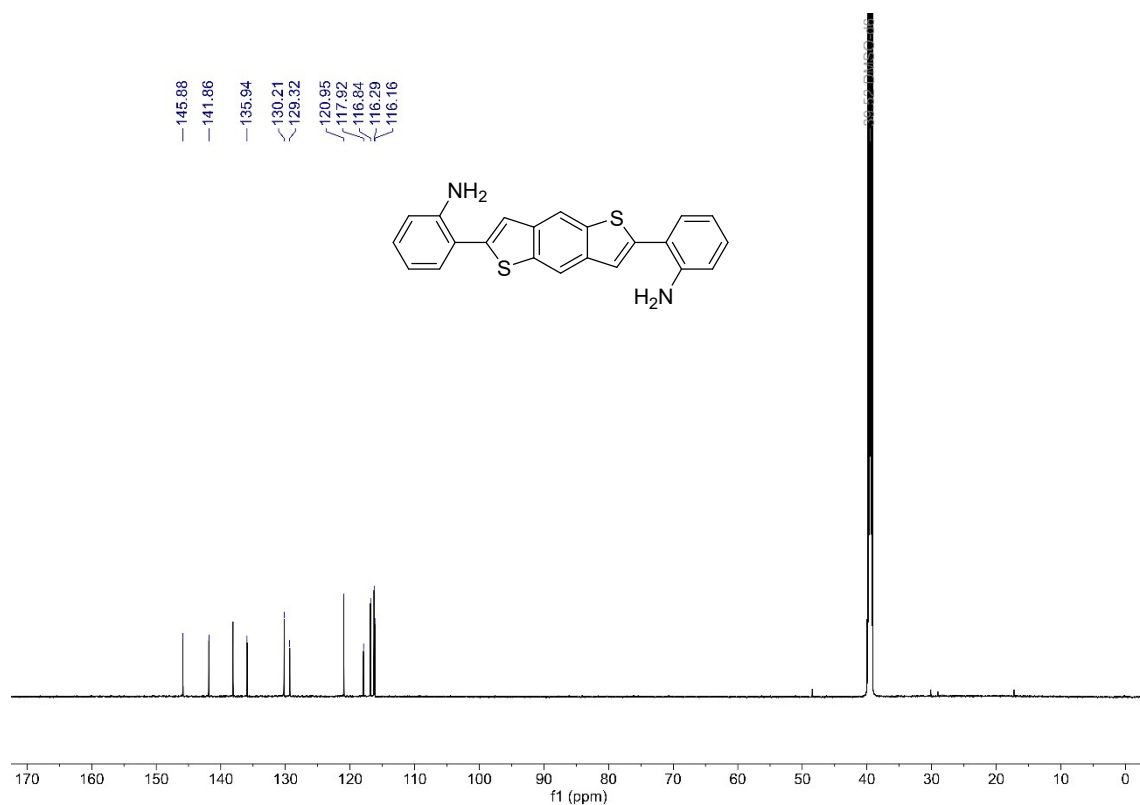

Figure S13.  $^{13}\text{C}$  { $^1\text{H}$ } NMR spectrum (176 MHz, DMSO- $d_6$ ) of 6a.

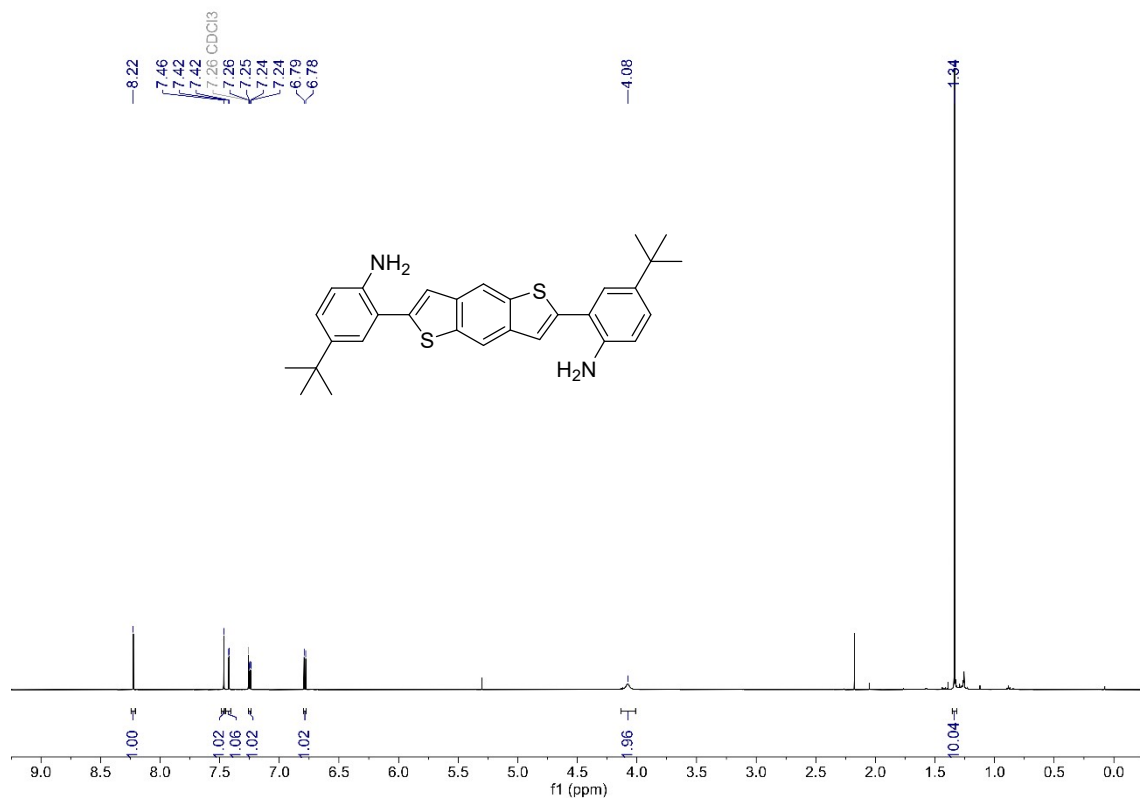

Figure S14.  $^1\text{H}$  NMR spectrum (600 MHz,  $\text{CDCl}_3$ ) of 6b.



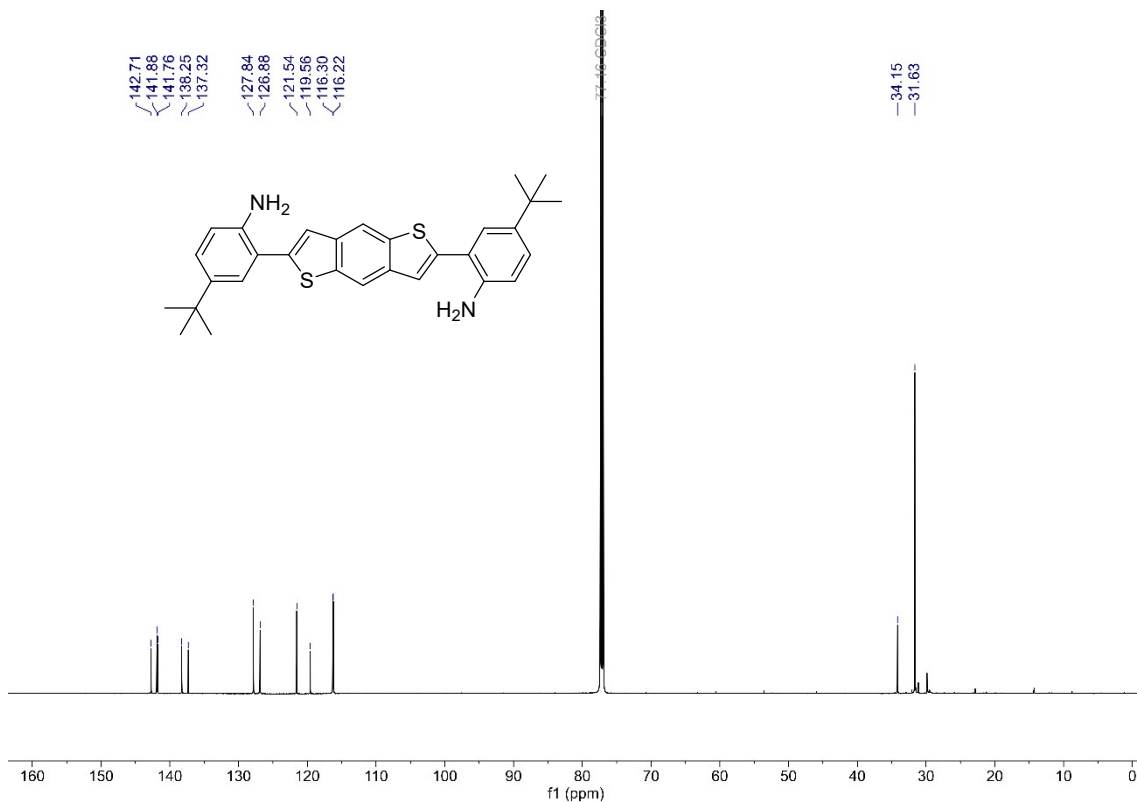

Figure S15.  $^{13}\text{C}$  { $^1\text{H}$ } NMR spectrum (151 MHz,  $\text{CDCl}_3$ ) of **6b**.

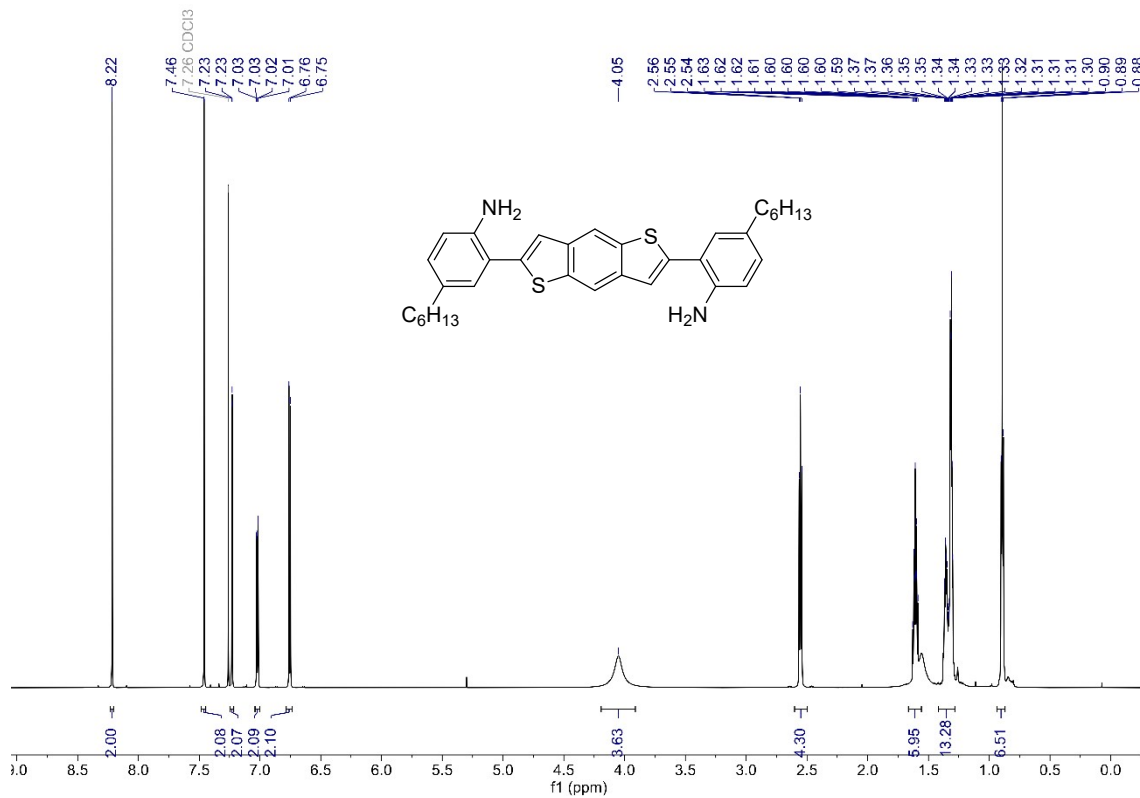

Figure S16.  $^1\text{H}$  NMR spectrum (700 MHz,  $\text{CDCl}_3$ ) of **6c**.

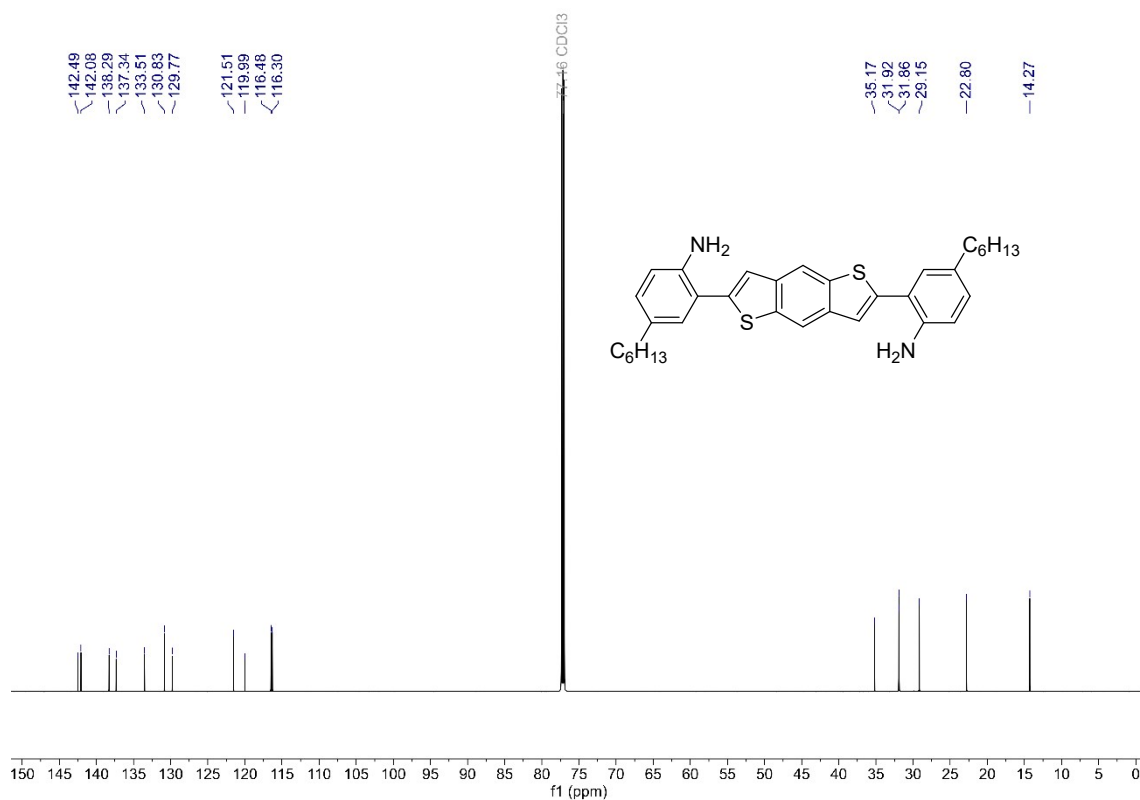

Figure S17.  $^{13}\text{C}\{^1\text{H}\}$  NMR spectrum (176 MHz,  $\text{CDCl}_3$ ) of **6c**.

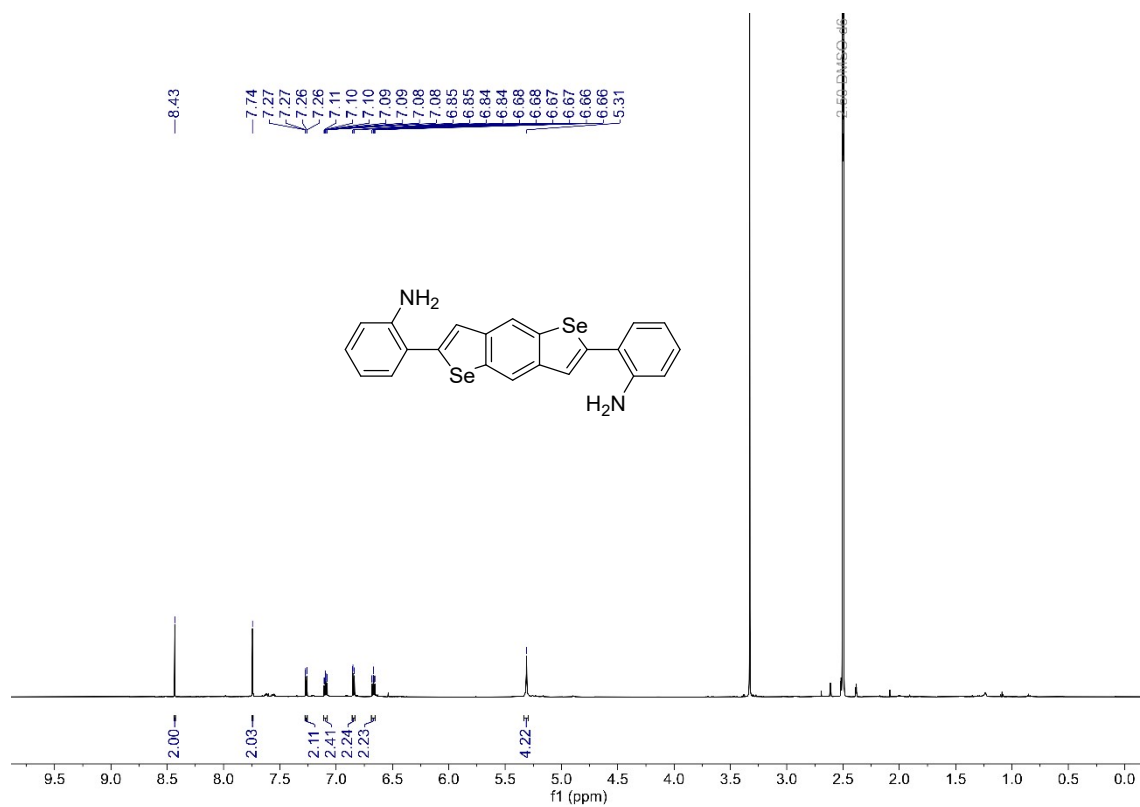

Figure S18.  $^1\text{H}$  NMR spectrum (600 MHz,  $\text{DMSO-d}_6$ ) of **7a**.

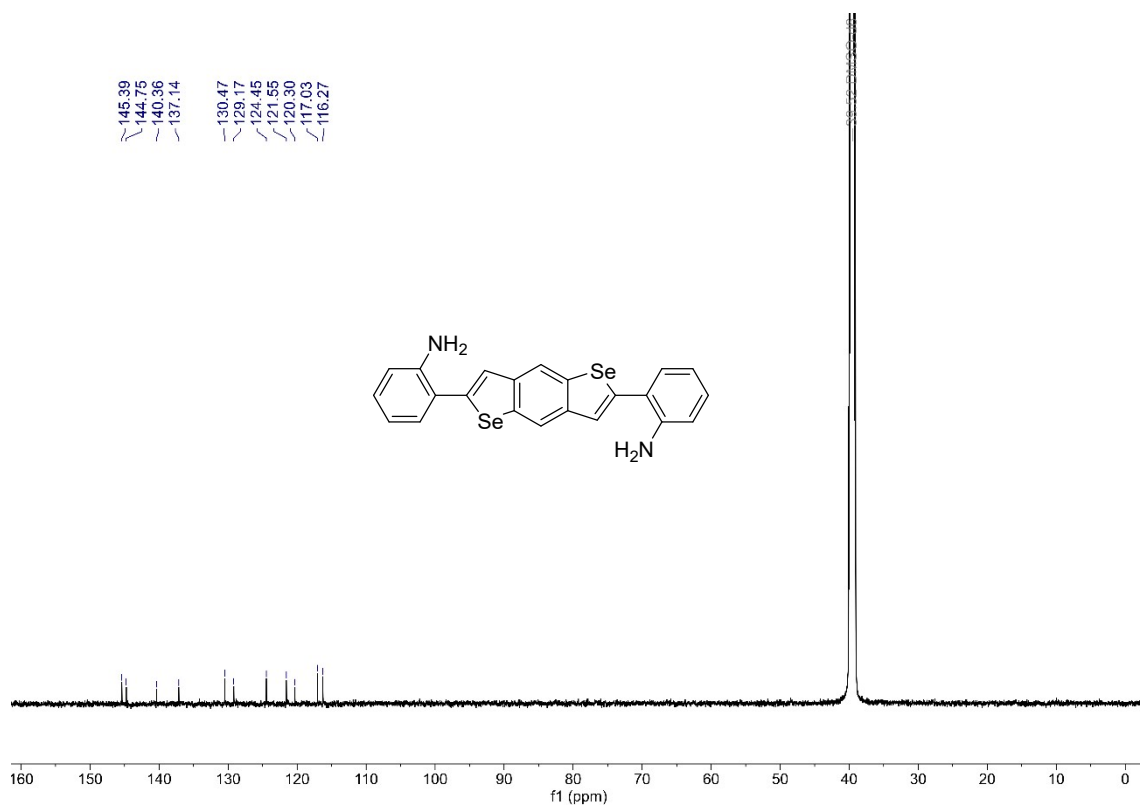

Figure S19.  $^{13}\text{C}\{^1\text{H}\}$  NMR spectrum (151 MHz, DMSO-d<sub>6</sub>) of 7a.

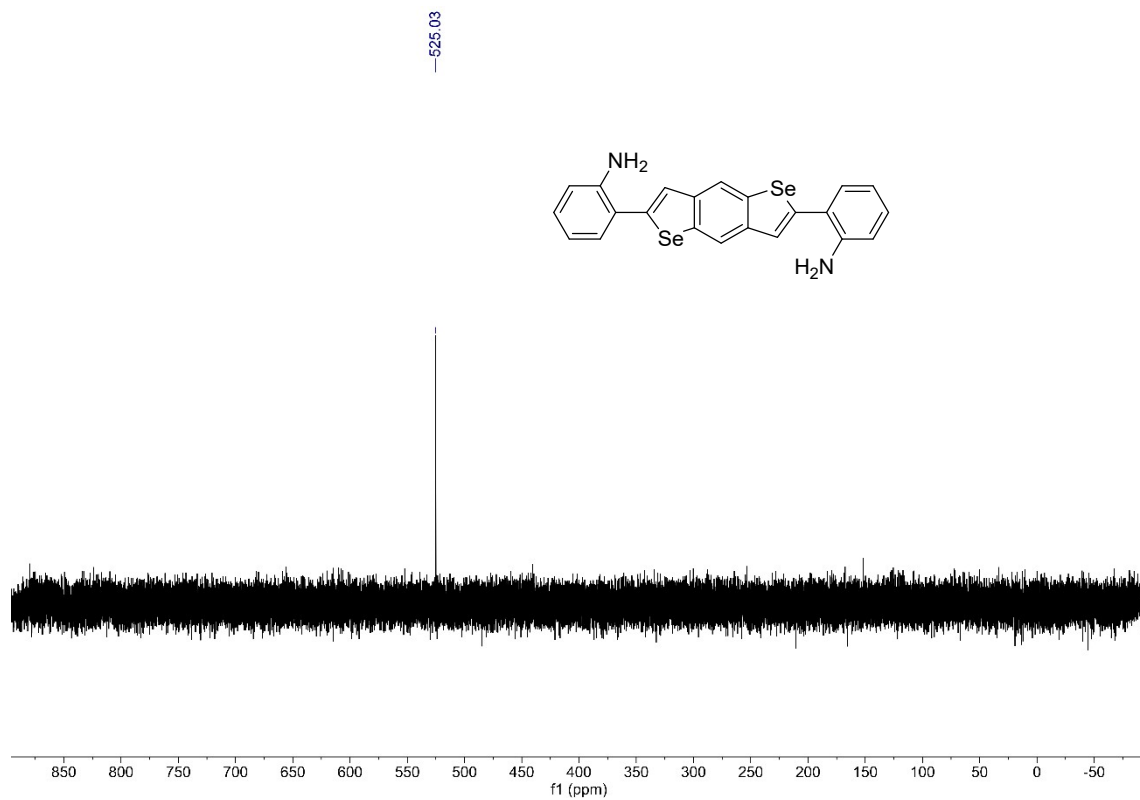

Figure S20.  $^{77}\text{Se}\{^1\text{H}\}$  NMR spectrum (76 MHz, DMSO-d<sub>6</sub>) of 7a.

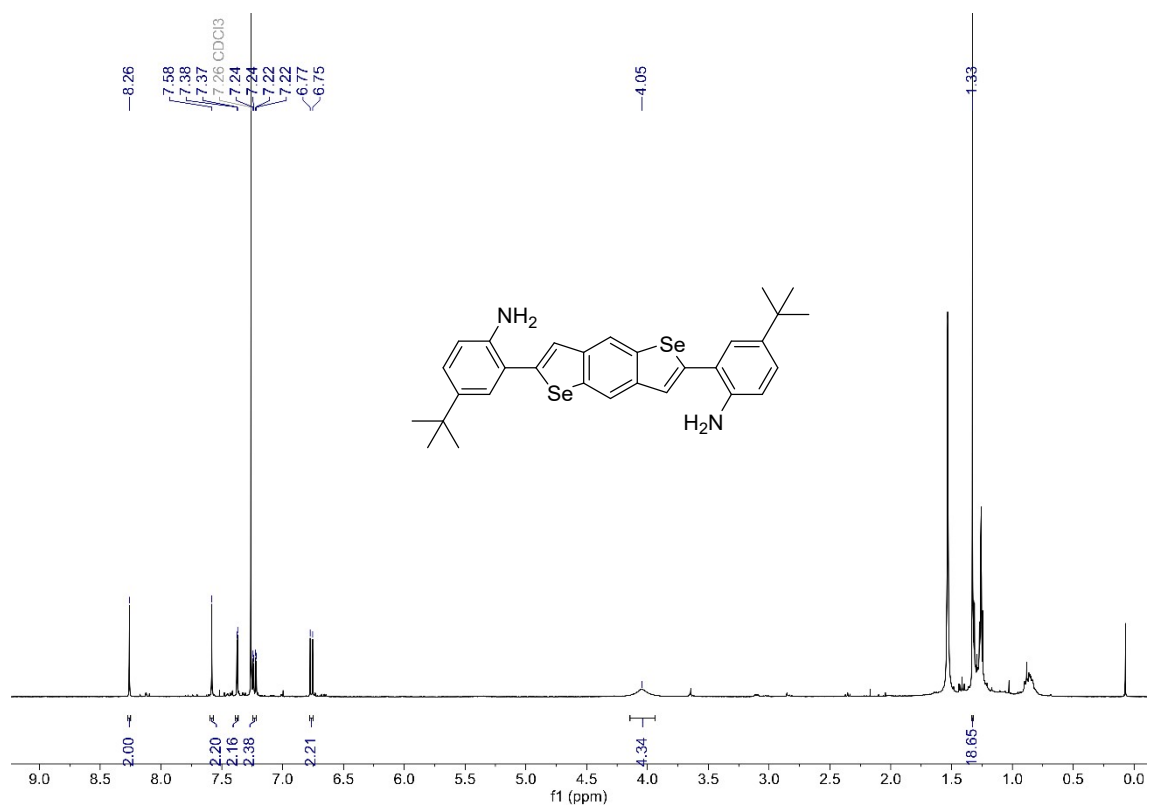

Figure S21. <sup>1</sup>H NMR spectrum (400 MHz, CDCl<sub>3</sub>) of 7b.

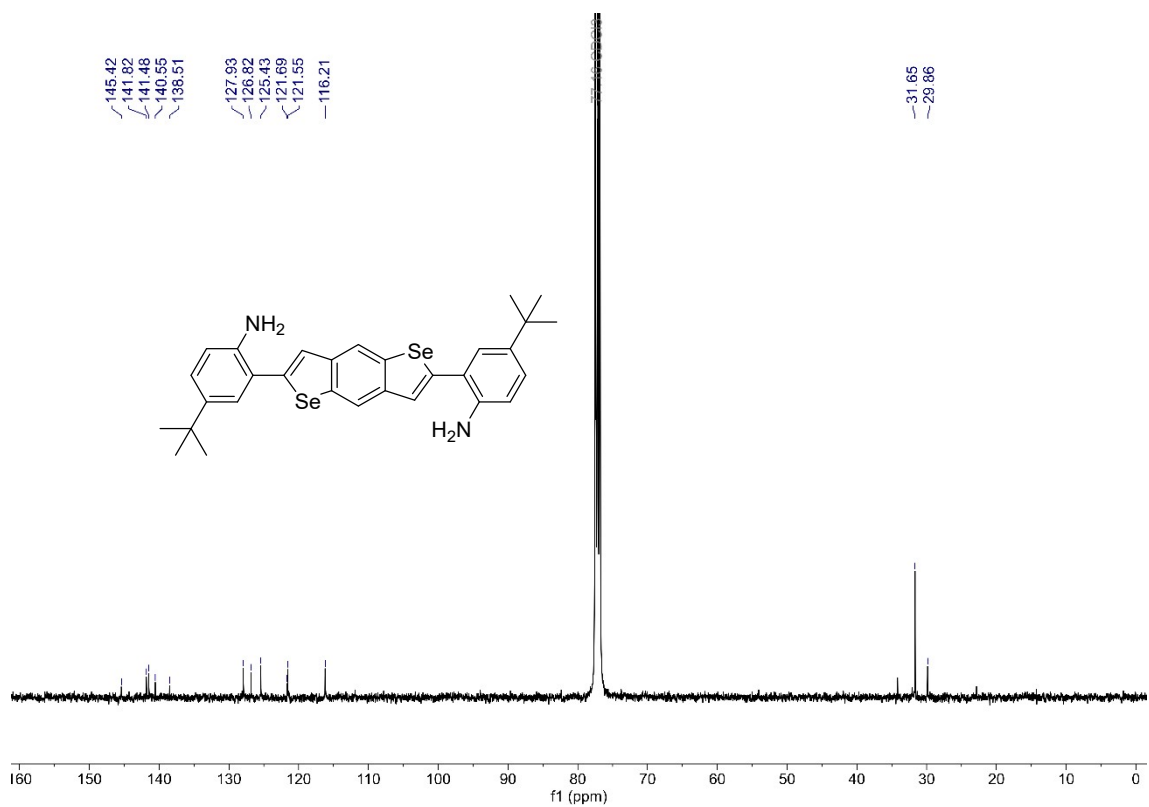

Figure S22. <sup>13</sup>C {<sup>1</sup>H} NMR spectrum (101 MHz, CDCl<sub>3</sub>) of 7b.

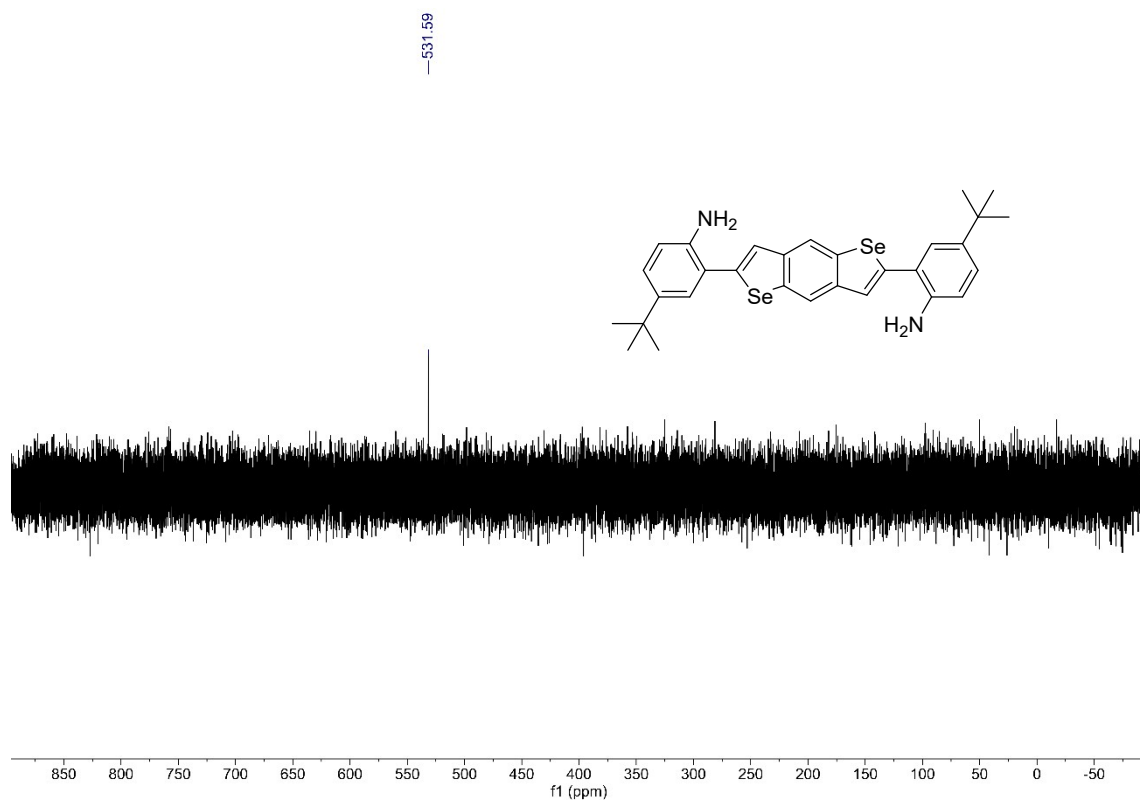

Figure S23.  $^{77}\text{Se}\{^1\text{H}\}$  NMR spectrum (76 MHz,  $\text{CDCl}_3$ ) of 7b.

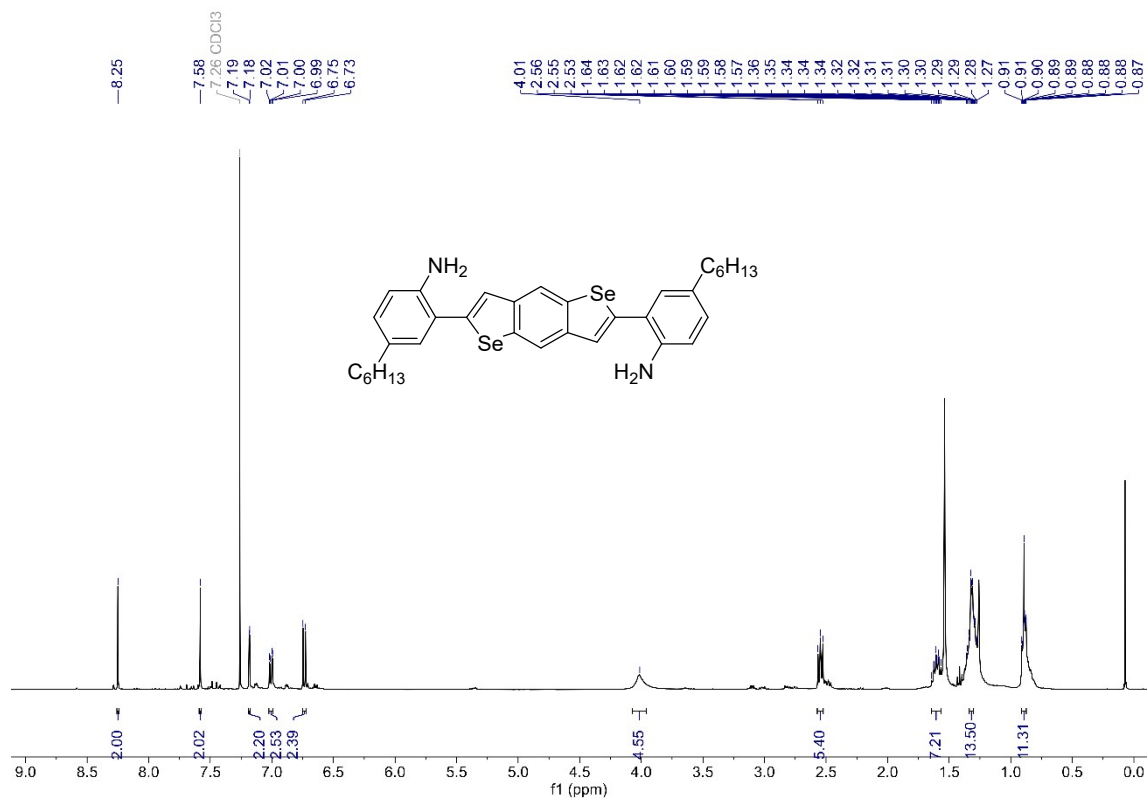

Figure S24.  $^1\text{H}$  NMR spectrum (400 MHz,  $\text{CDCl}_3$ ) of 7c.

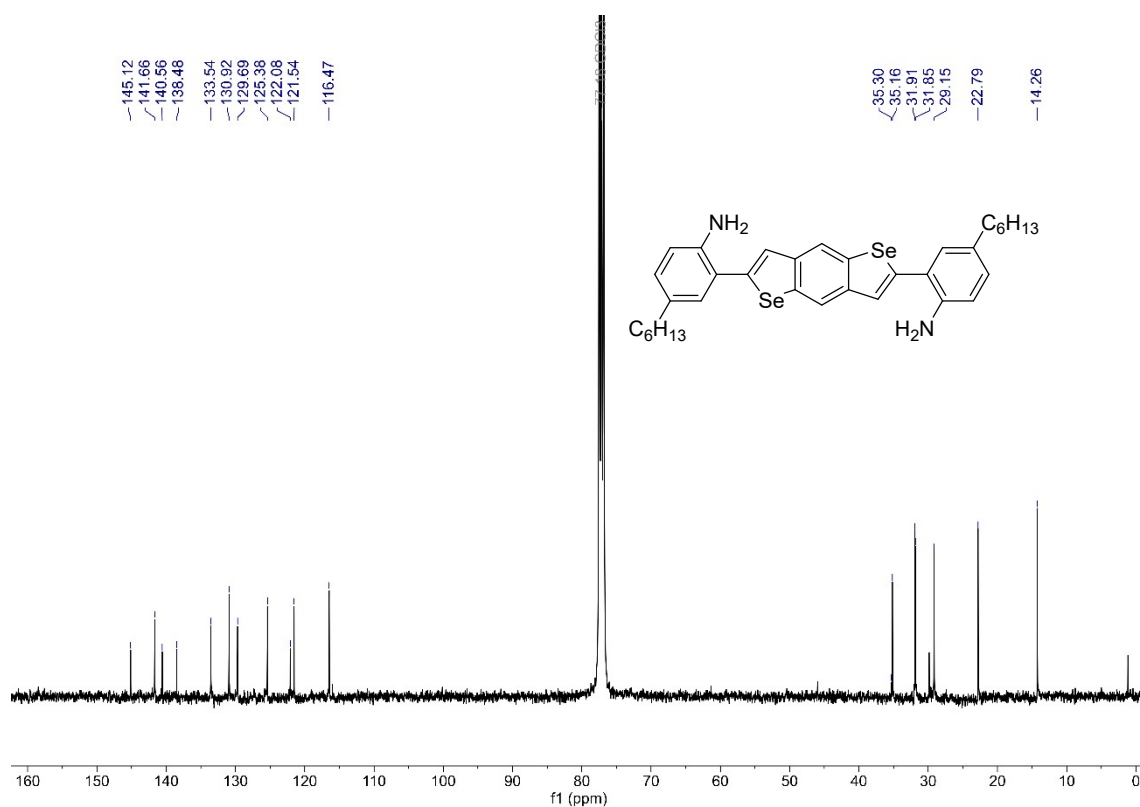

Figure S25.  $^{13}\text{C}\{^1\text{H}\}$  NMR spectrum (101 MHz,  $\text{CDCl}_3$ ) of 7c.

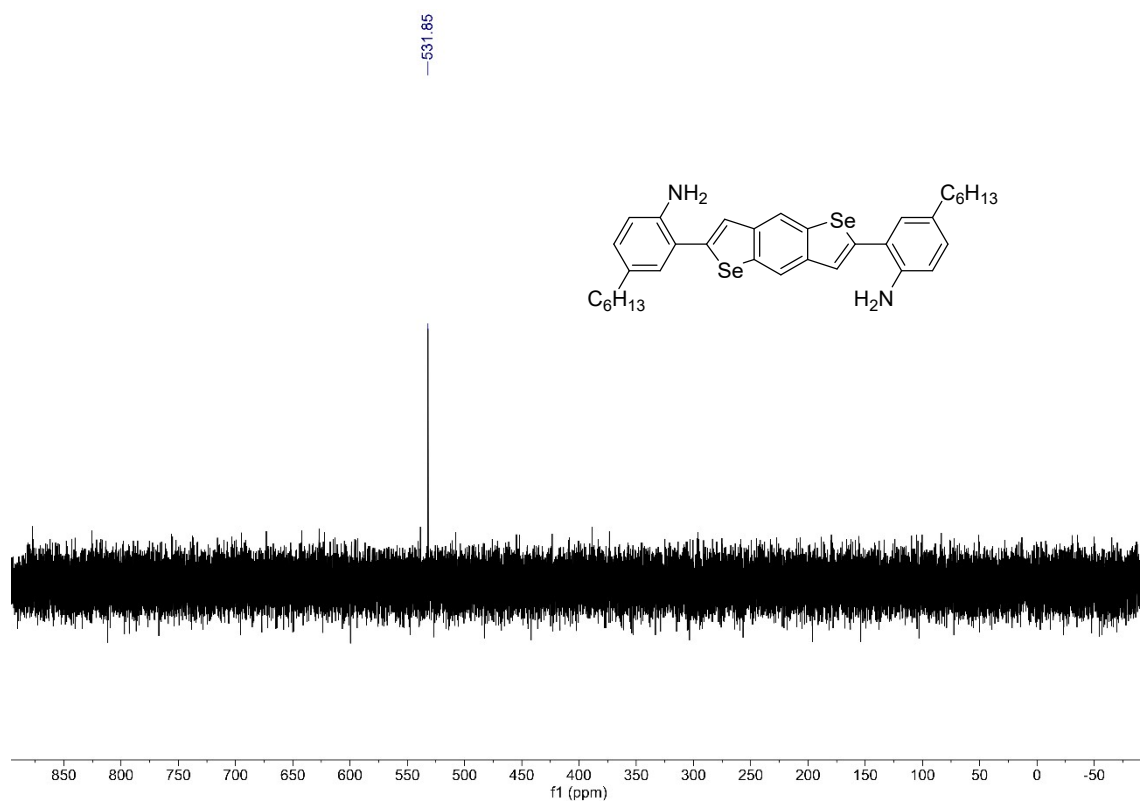

Figure S26.  $^{77}\text{Se}\{^1\text{H}\}$  NMR spectrum (76 MHz,  $\text{CDCl}_3$ ) of 7c.

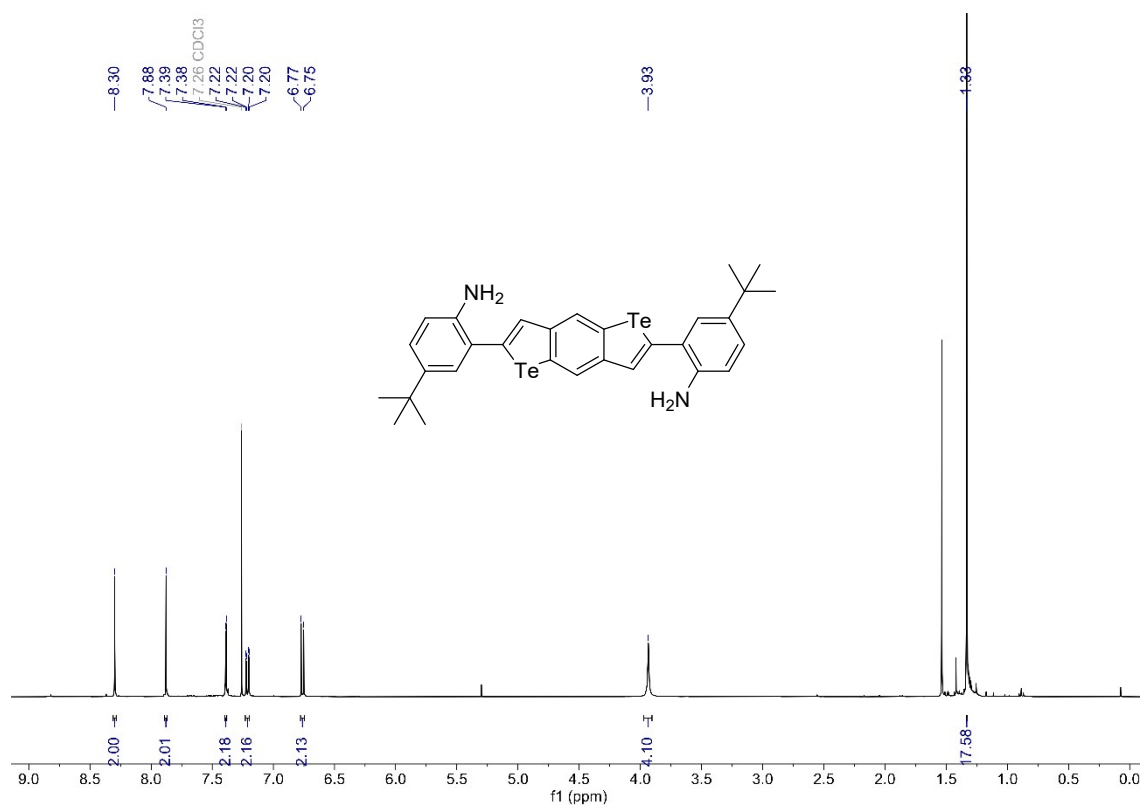

Figure S27.  $^1\text{H}$  NMR spectrum (400 MHz,  $\text{CDCl}_3$ ) of **8**.

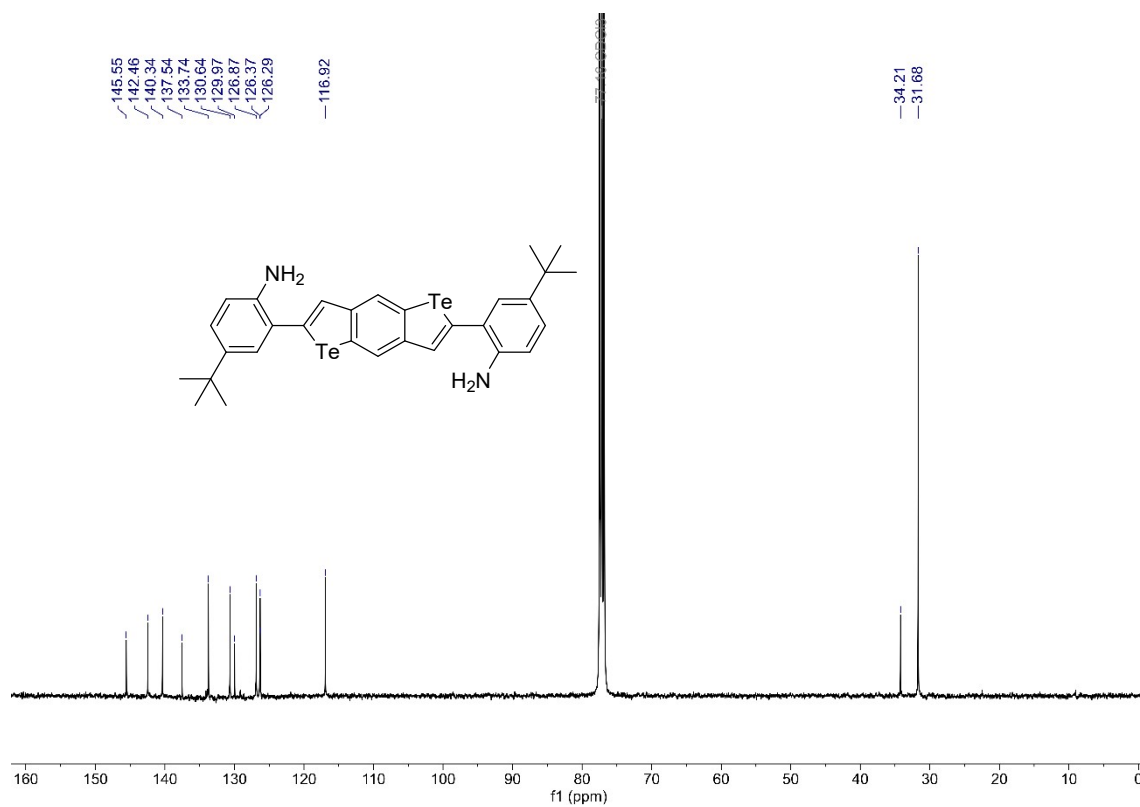

Figure S28.  $^{13}\text{C}$   $\{^1\text{H}\}$  NMR spectrum (101 MHz,  $\text{CDCl}_3$ ) of **8**.

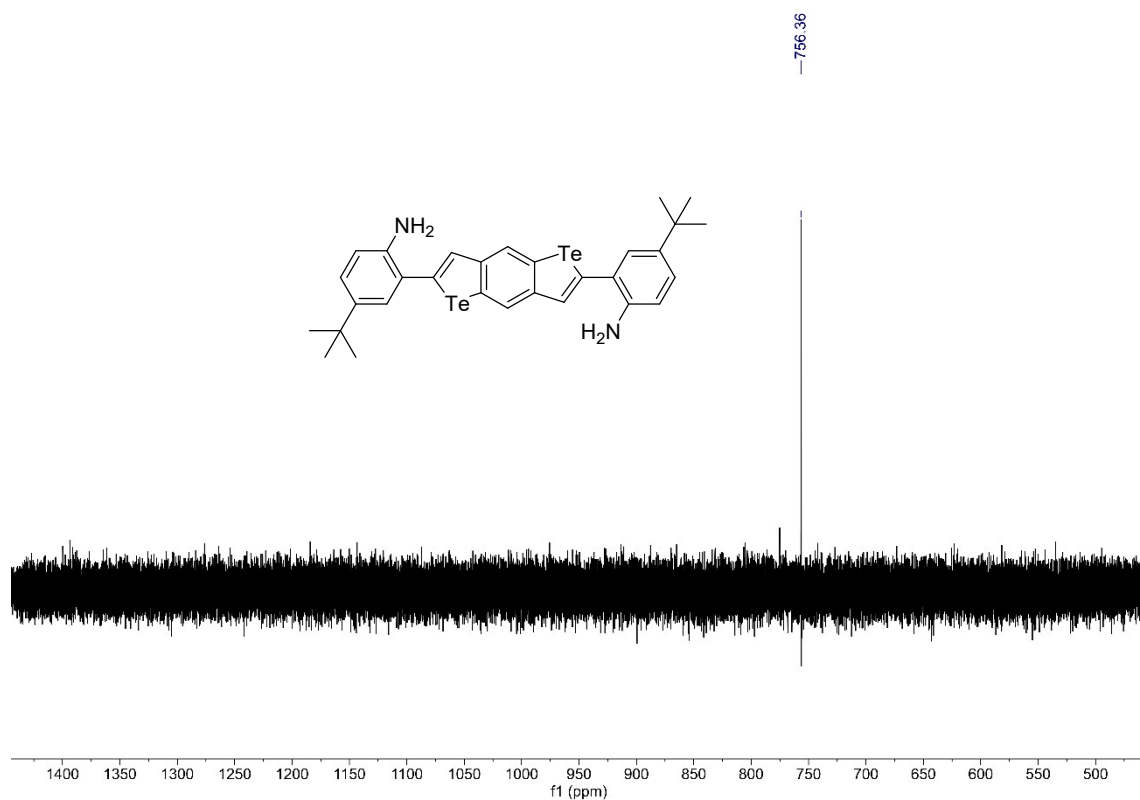

Figure S29.  $^{125}\text{Te}\{^1\text{H}\}$  NMR spectrum (126 MHz,  $\text{CDCl}_3$ ) of 8.

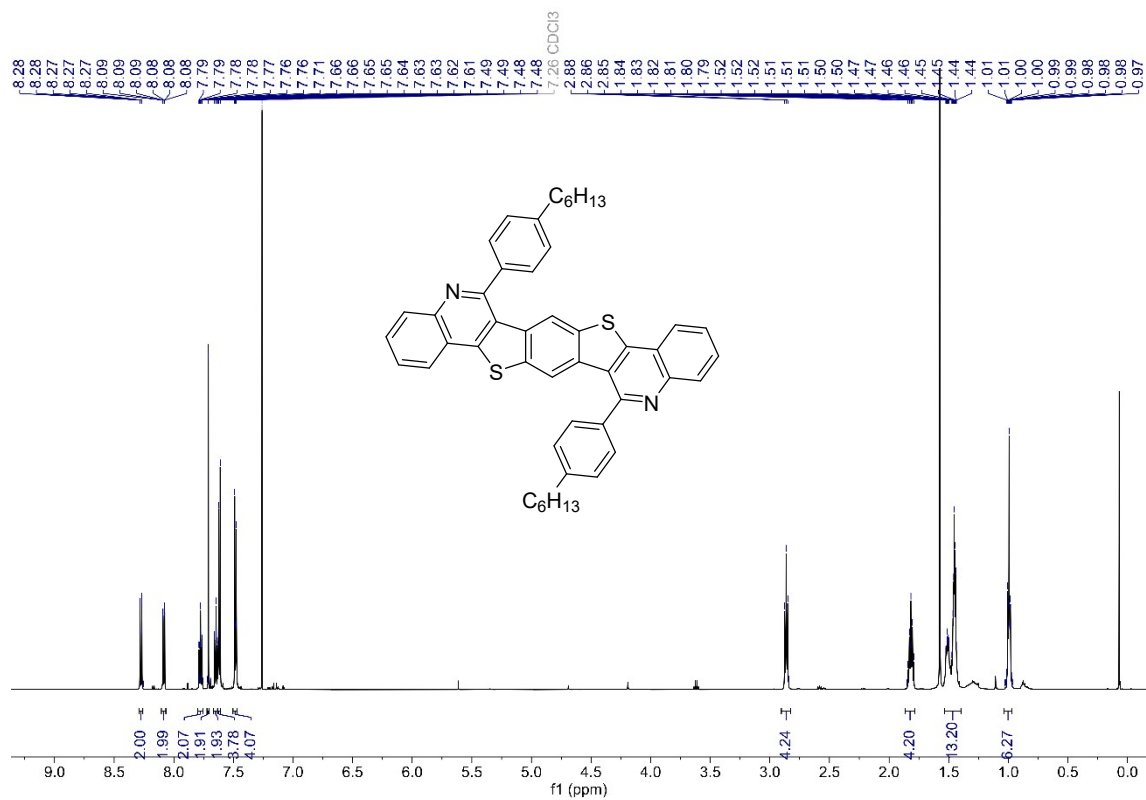

Figure S30.  $^1\text{H}$  NMR spectrum (600 MHz,  $\text{CDCl}_3$ ) of 9aa.



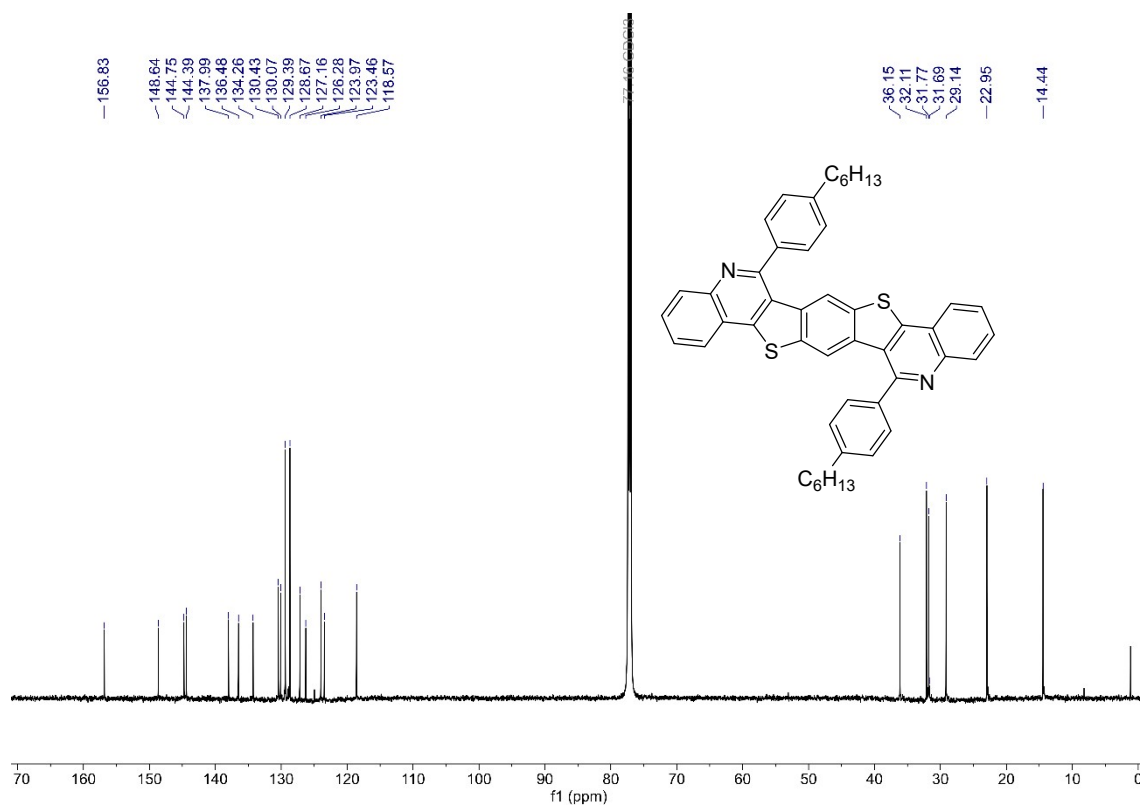

Figure S31. <sup>13</sup>C {<sup>1</sup>H} NMR spectrum (151 MHz, CDCl<sub>3</sub>) of **9aa**.

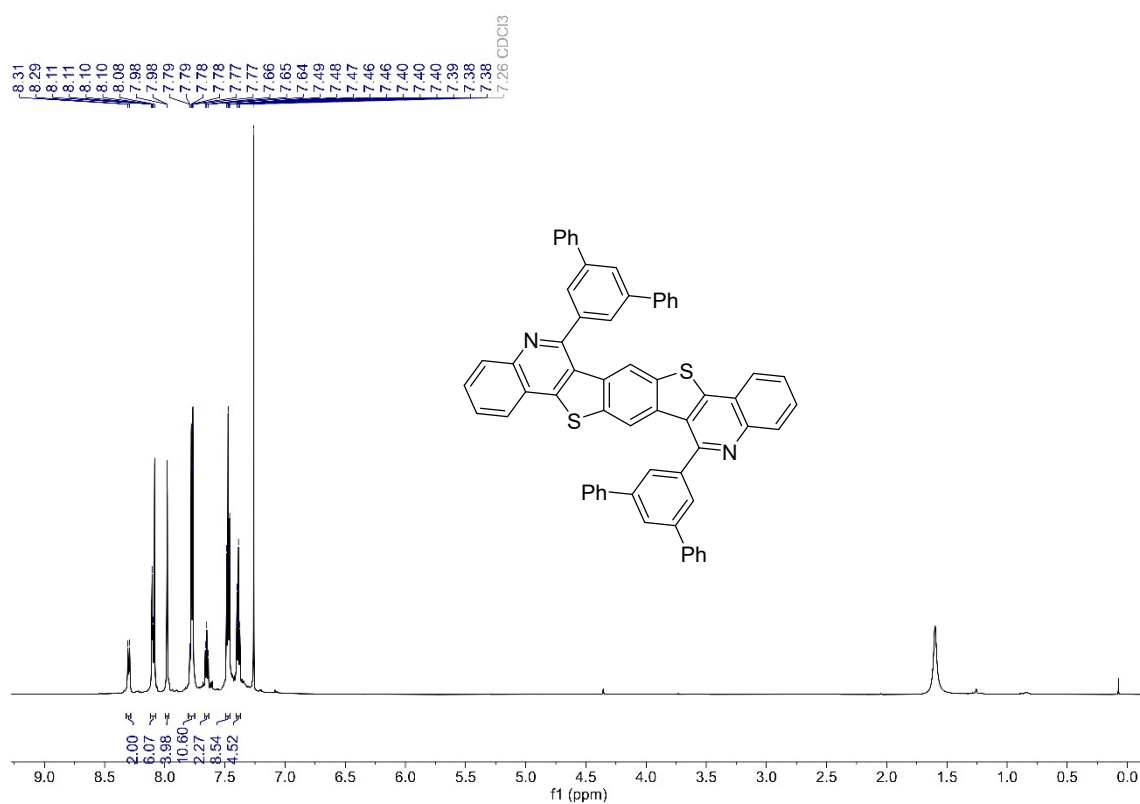

Figure S32. <sup>1</sup>H NMR spectrum (600 MHz, CDCl<sub>3</sub>) of **9ab**.

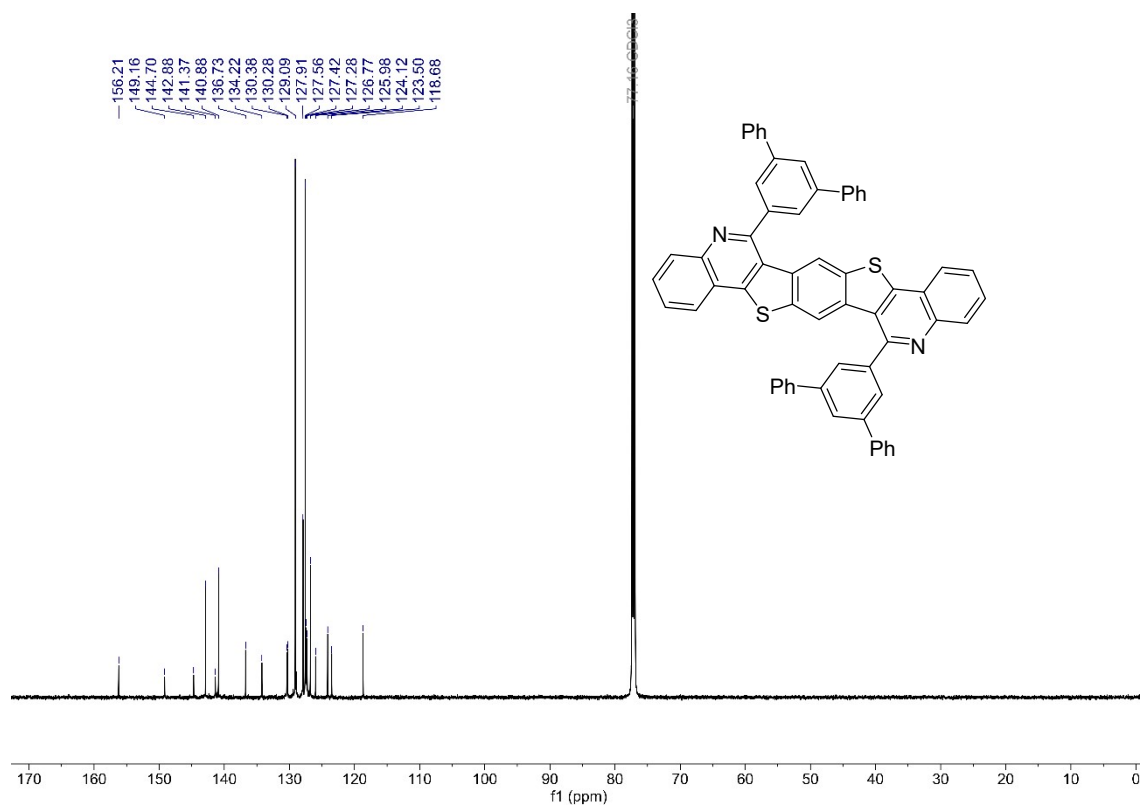

Figure S33.  $^{13}\text{C}$   $\{^1\text{H}\}$  NMR spectrum (151 MHz,  $\text{CDCl}_3$ ) of **9ab**.

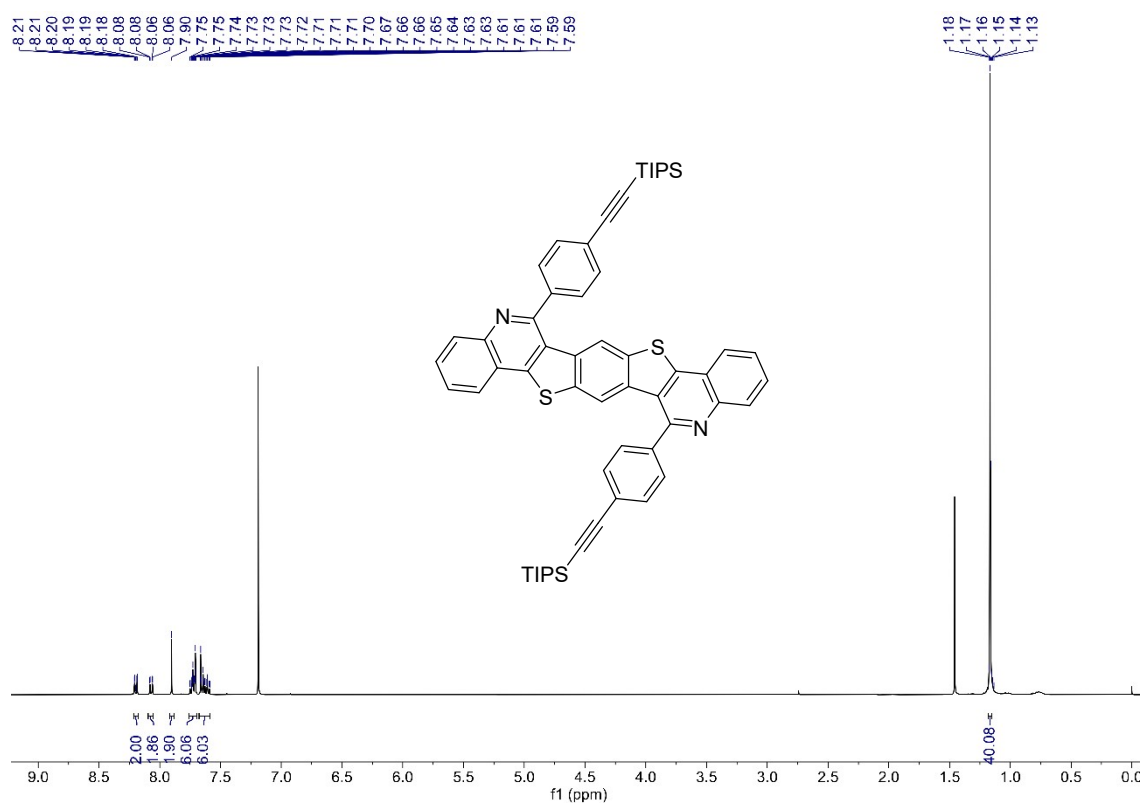

Figure S34.  $^1\text{H}$  NMR spectrum (400 MHz,  $\text{CDCl}_3$ ) of **9ac**.

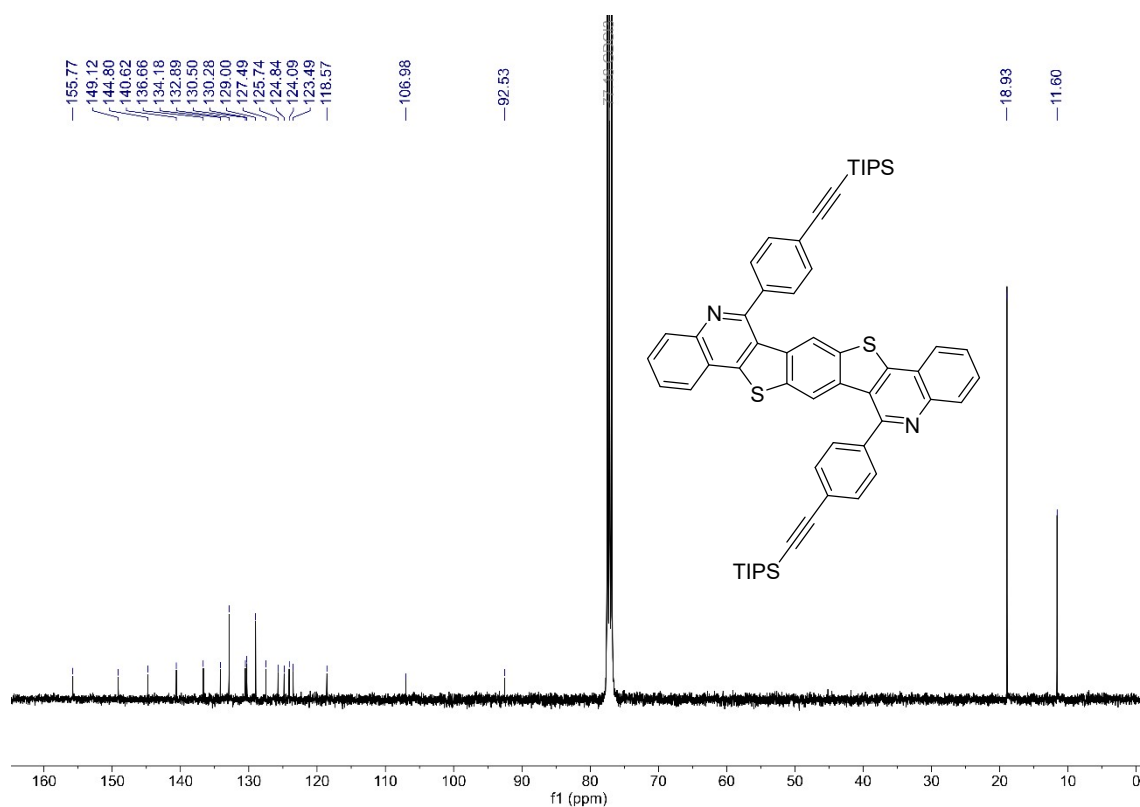

Figure S35.  $^{13}\text{C}$   $\{^1\text{H}\}$  NMR spectrum (101 MHz,  $\text{CDCl}_3$ ) of **9ac**.

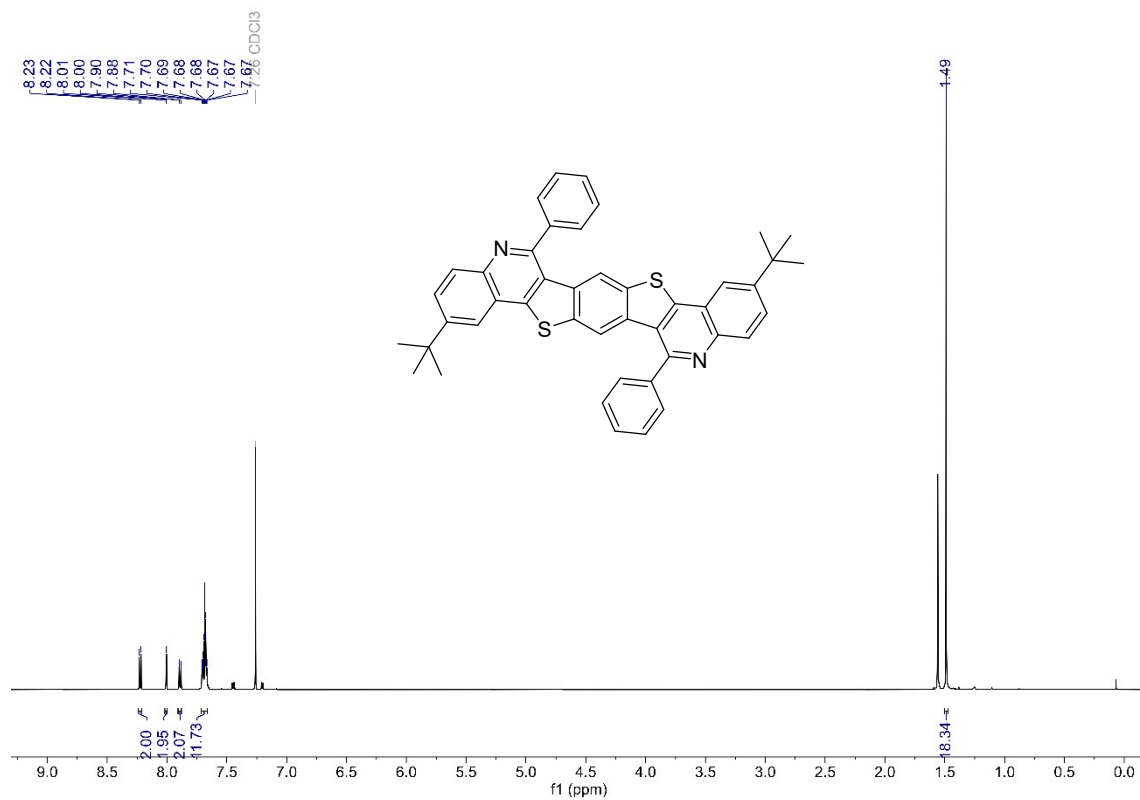

Figure S36.  $^1\text{H}$  NMR spectrum (600 MHz,  $\text{CDCl}_3$ ) of **9ba**.

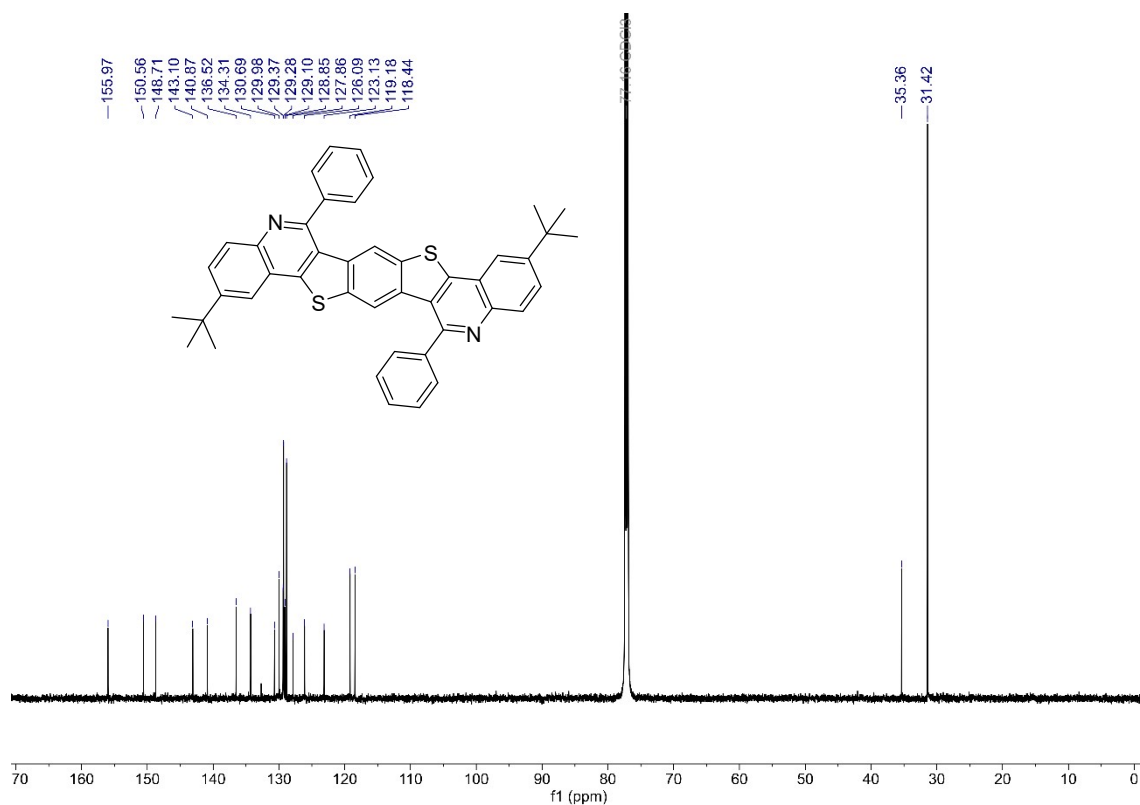

Figure S37.  $^{13}\text{C}$  { $^1\text{H}$ } NMR spectrum (151 MHz,  $\text{CDCl}_3$ ) of 9ba.

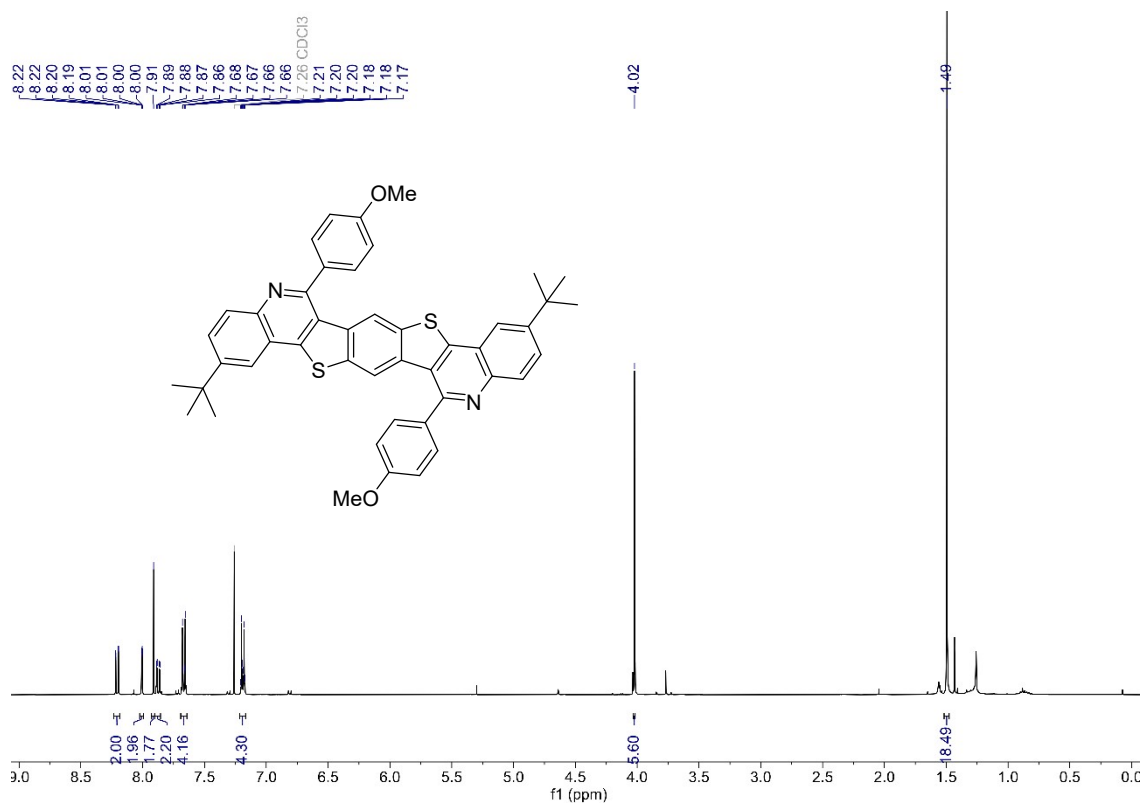

Figure S38.  $^1\text{H}$  NMR spectrum (400 MHz,  $\text{CDCl}_3$ ) of 9bb.

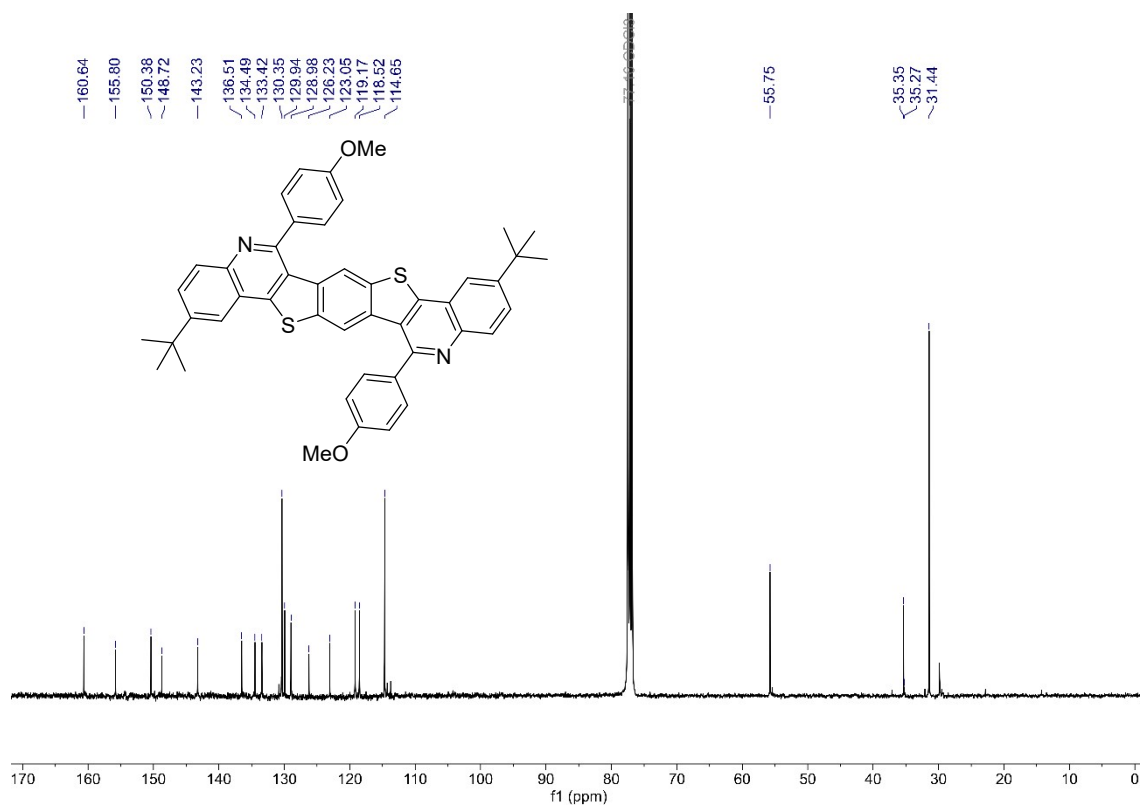

Figure S39.  $^{13}\text{C}\{^1\text{H}\}$  NMR spectrum (101 MHz,  $\text{CDCl}_3$ ) of **9bb**.

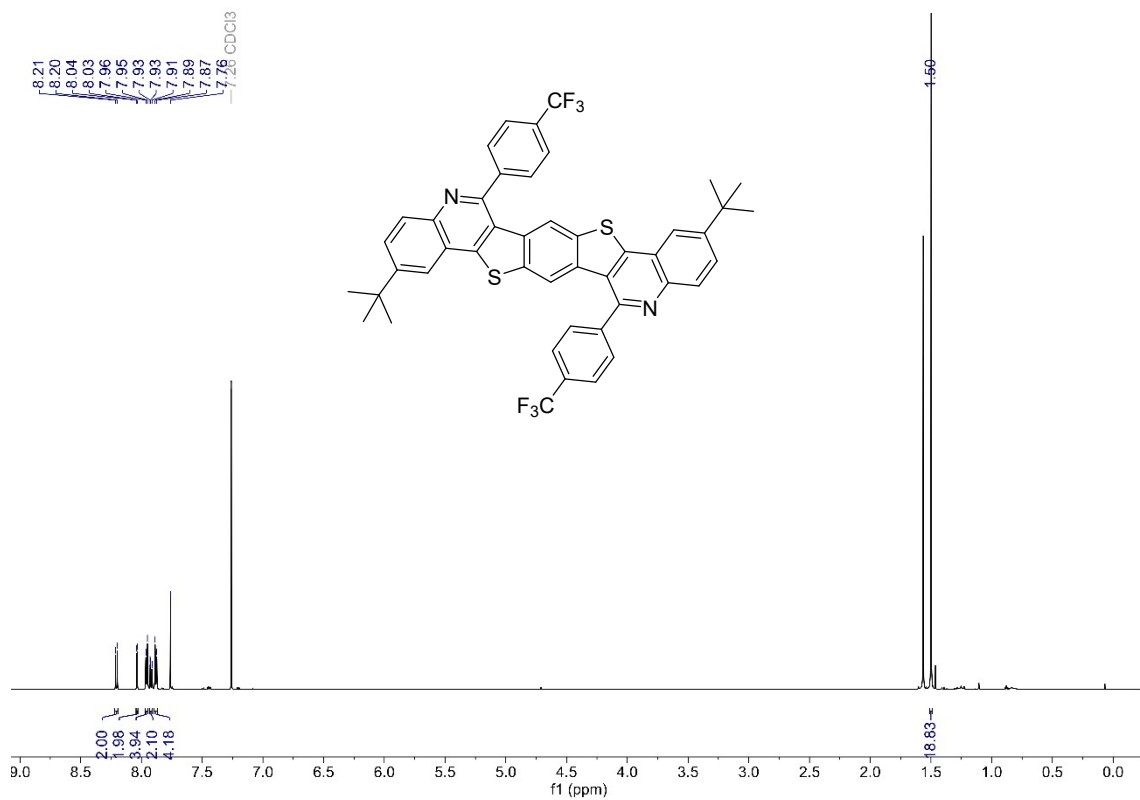

Figure S40.  $^1\text{H}$  NMR spectrum (600 MHz,  $\text{CDCl}_3$ ) of **9bc**.

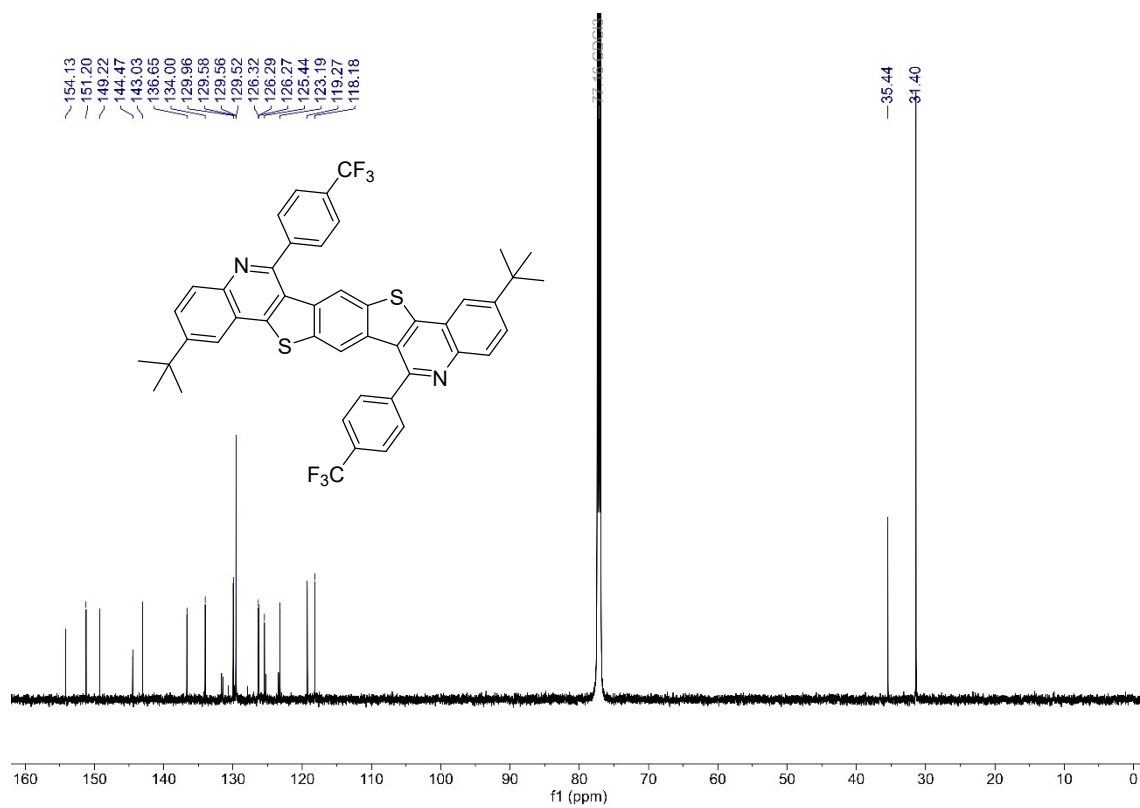

Figure S41.  $^{13}\text{C}$   $\{^1\text{H}\}$  NMR spectrum (151 MHz,  $\text{CDCl}_3$ ) of **9bc**.

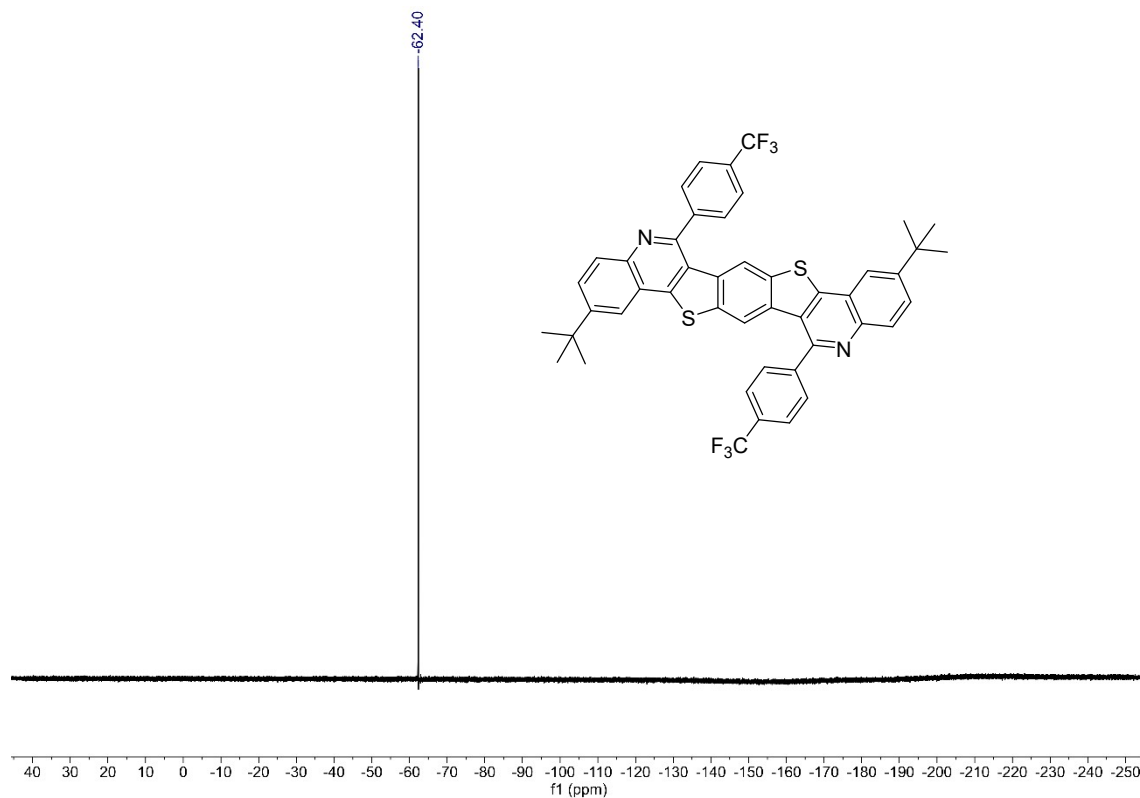

Figure S42.  $^{19}\text{F}$   $\{^1\text{H}\}$  NMR spectrum (283 MHz,  $\text{CDCl}_3$ ) of **9bc**.

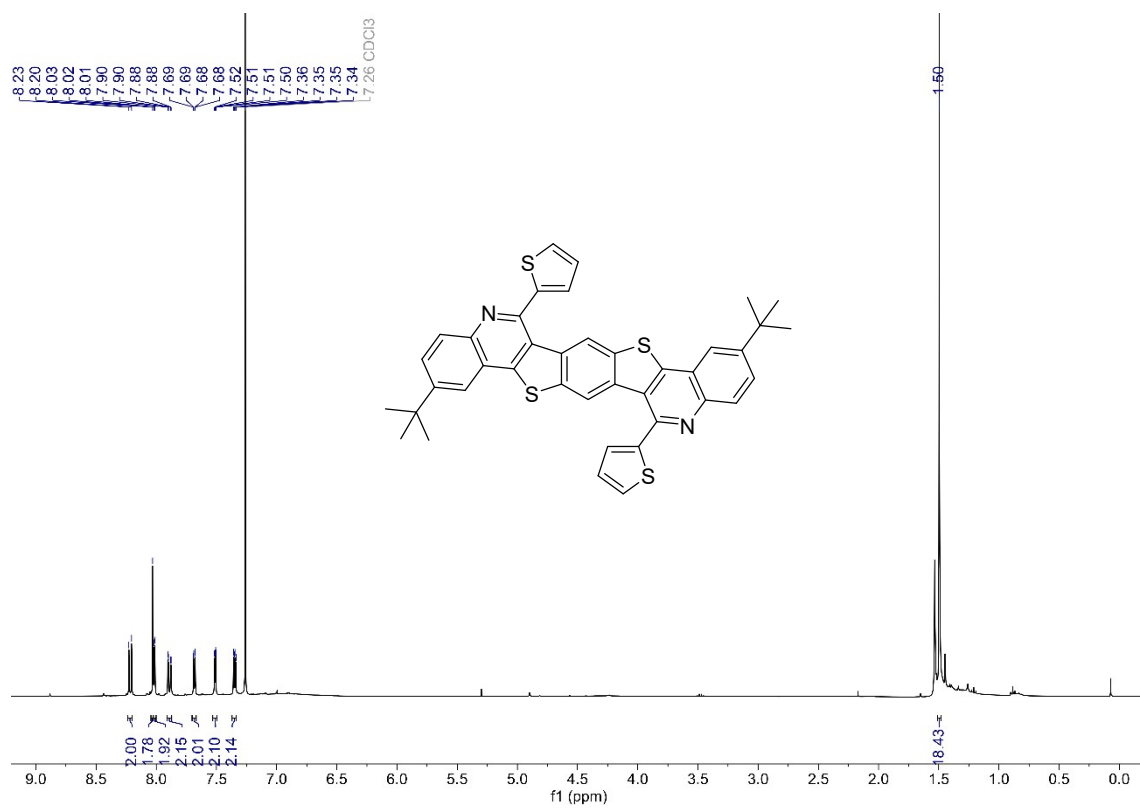

**Figure S43.**  $^1\text{H}$  NMR spectrum (400 MHz,  $\text{CDCl}_3$ ) of **9bd**.

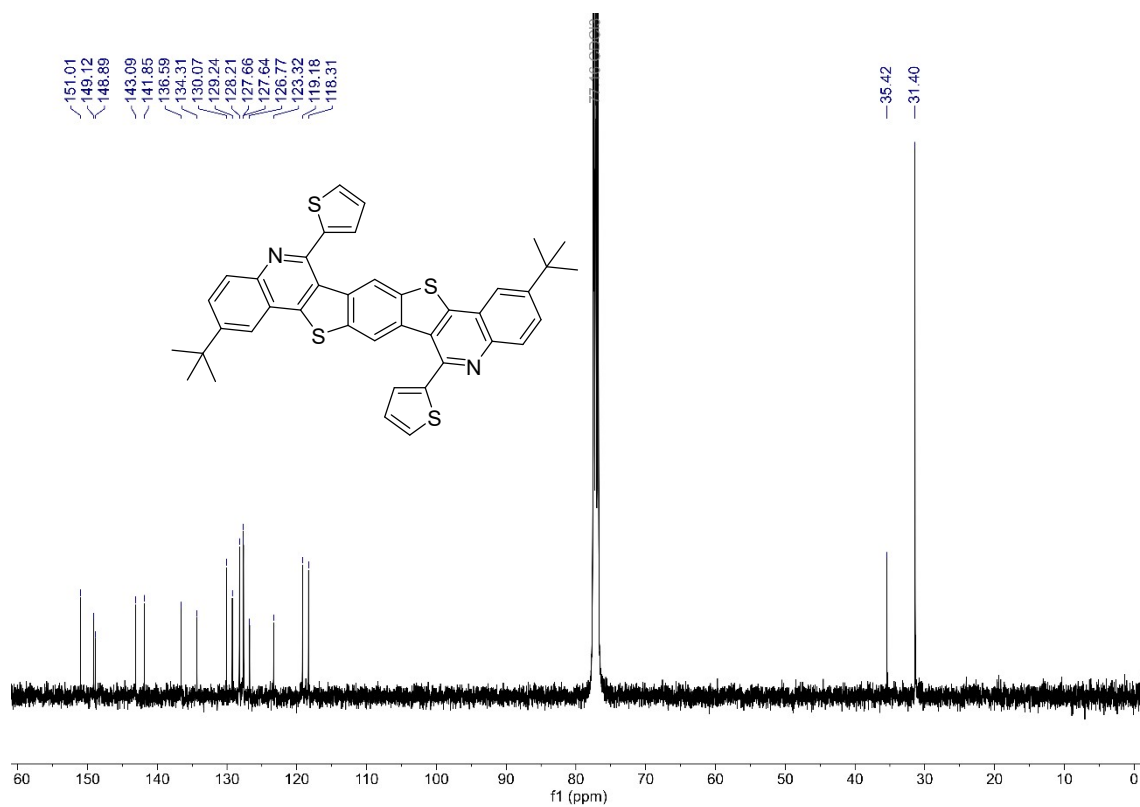

**Figure S44.**  $^{13}\text{C}$   $\{^1\text{H}\}$  NMR spectrum (101 MHz,  $\text{CDCl}_3$ ) of **9bd**.

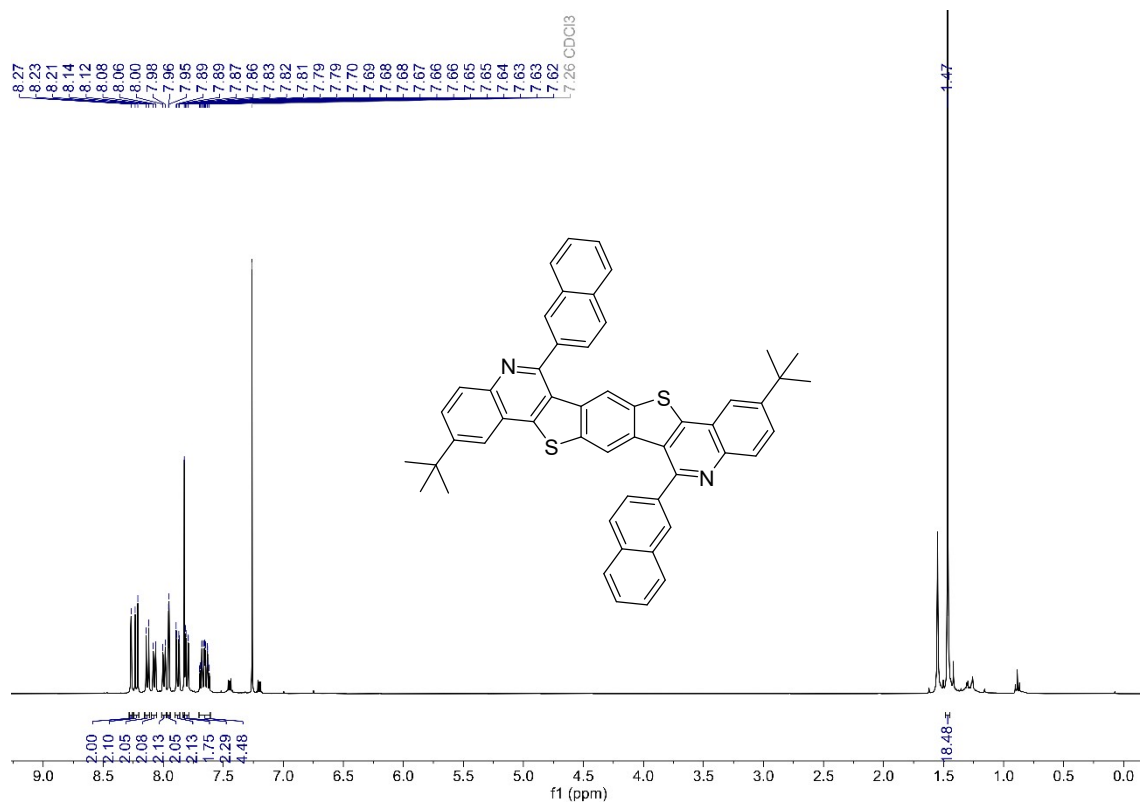

Figure S45. <sup>1</sup>H NMR spectrum (400 MHz, CDCl<sub>3</sub>) of **9be**.

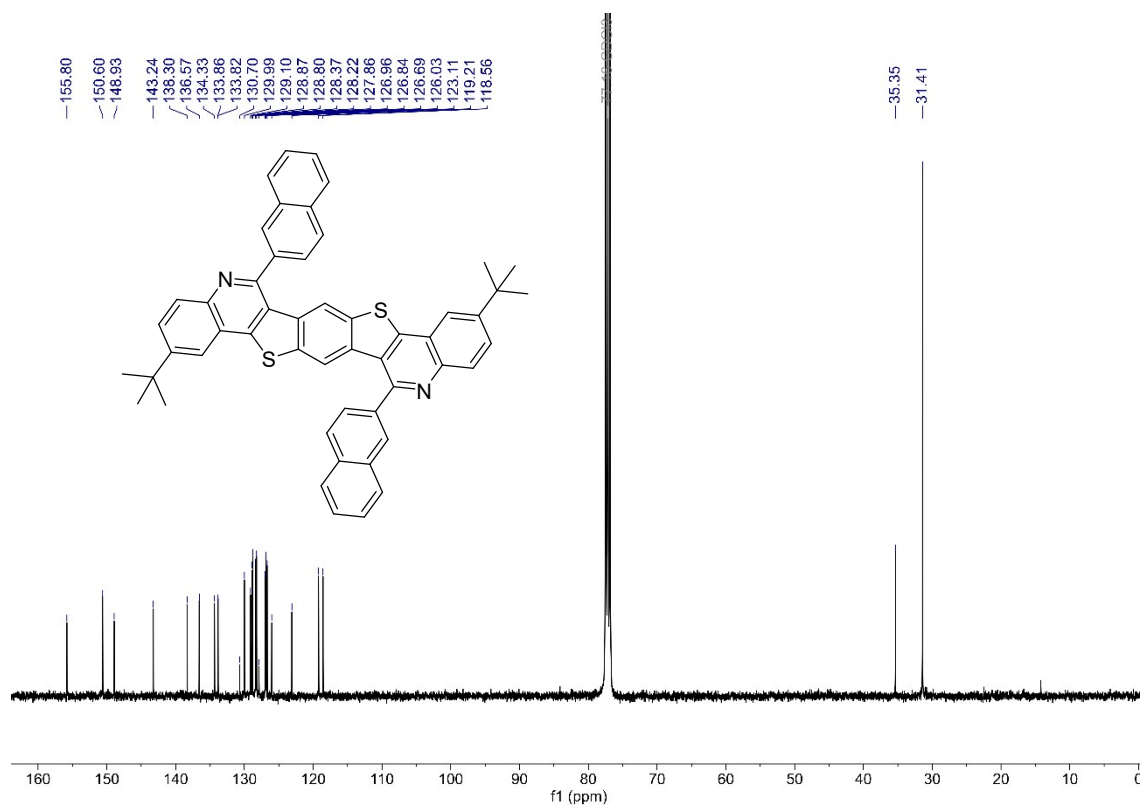

Figure S46. <sup>13</sup>C {<sup>1</sup>H} NMR spectrum (101 MHz, CDCl<sub>3</sub>) of **9be**.



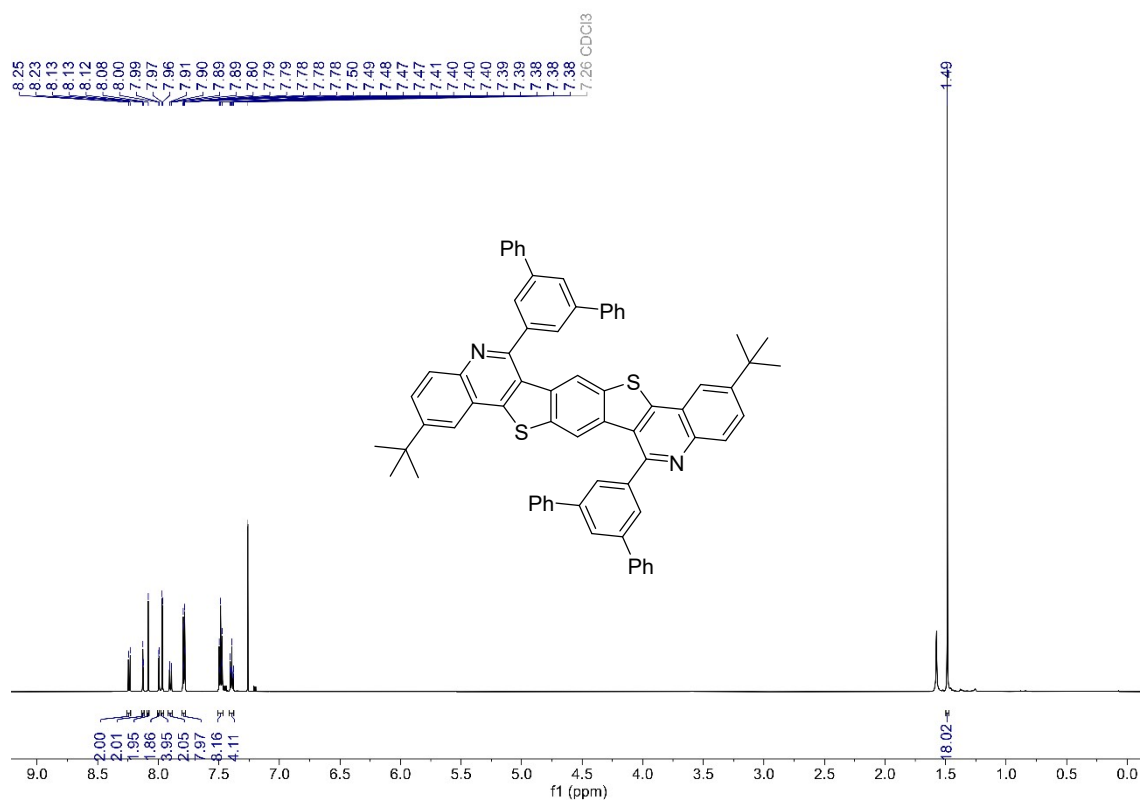

Figure S47.  $^1\text{H}$  NMR spectrum (600 MHz,  $\text{CDCl}_3$ ) of **9bf**.

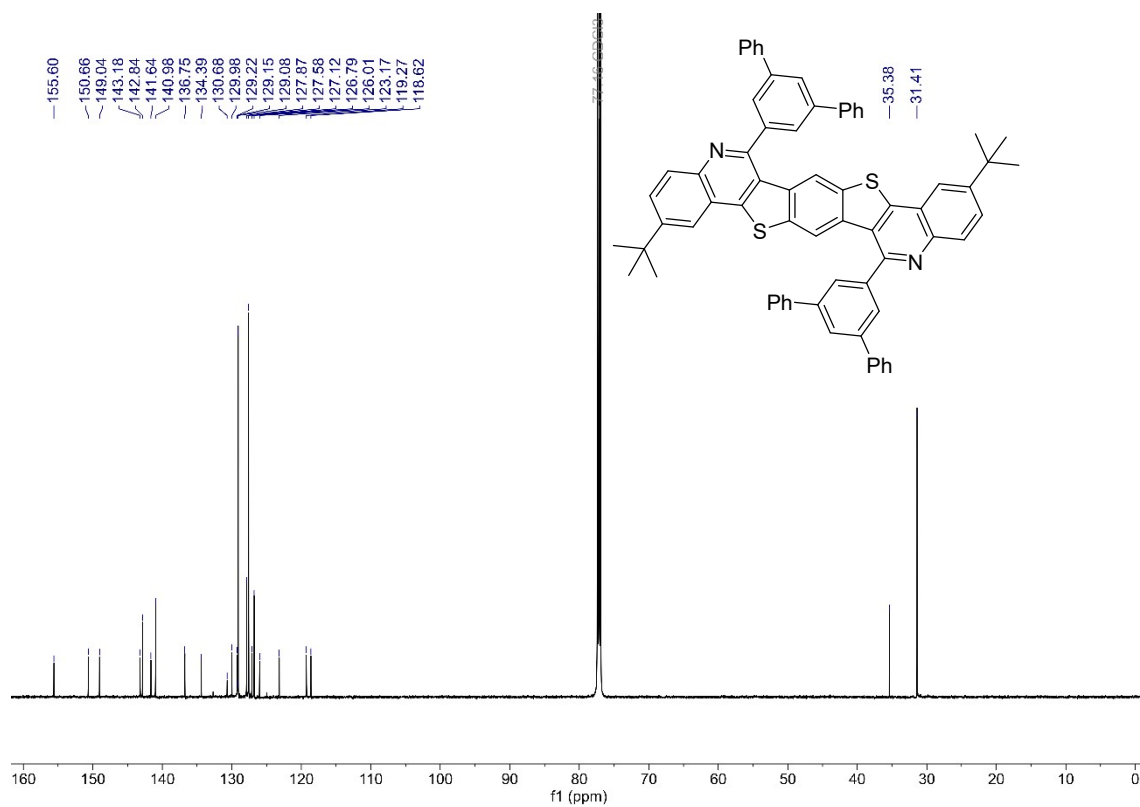

Figure S48.  $^{13}\text{C}$   $\{^1\text{H}\}$  NMR spectrum (151 MHz,  $\text{CDCl}_3$ ) of **9bf**.

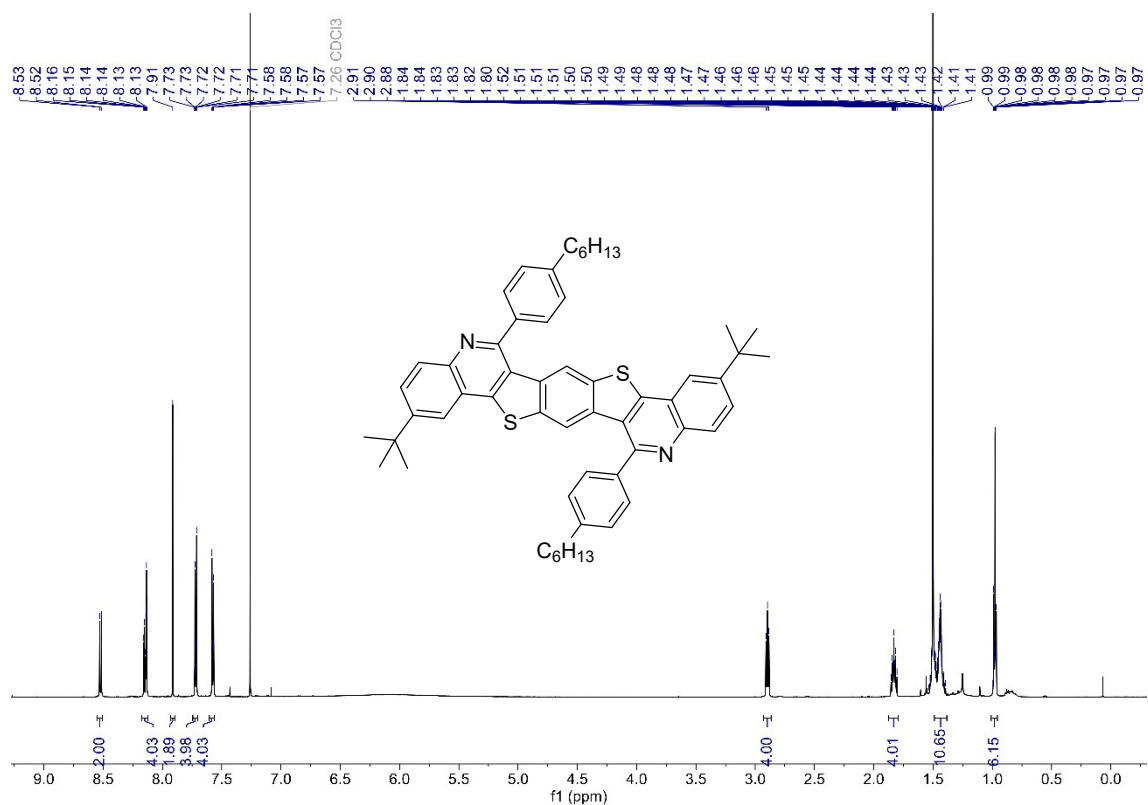

Figure S49.  $^1H$  NMR spectrum (600 MHz,  $CDCl_3$ ) of **9bg**.

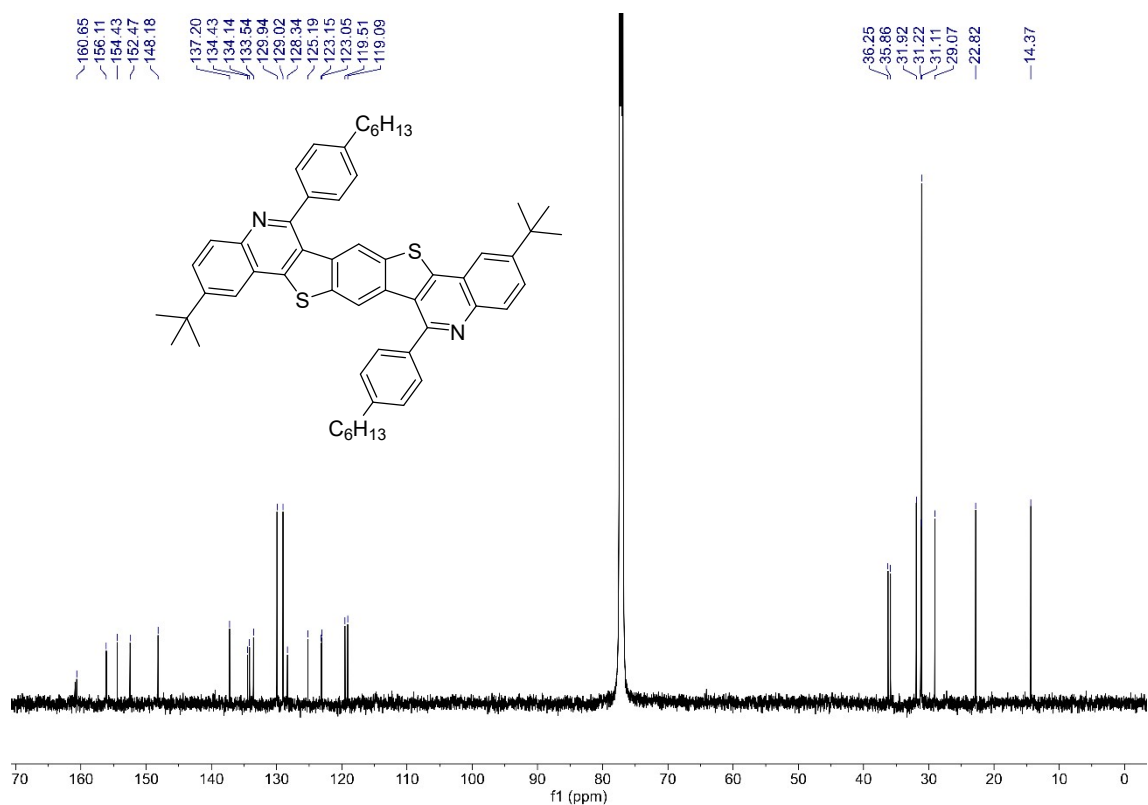

Figure S50.  $^{13}C$   $\{^1H\}$  NMR spectrum (151 MHz,  $CDCl_3$ ) of **9bg**.

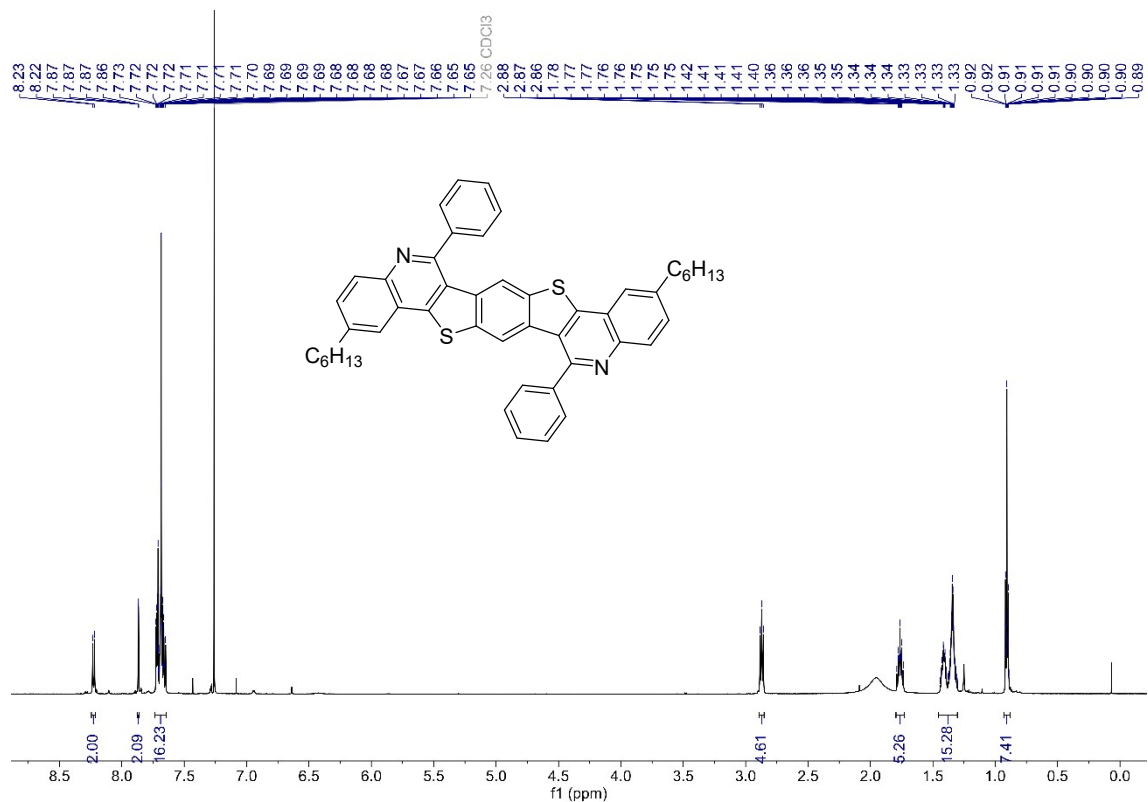

Figure S51.  $^1H$  NMR spectrum (600 MHz,  $CDCl_3$ ) of **9ca**.

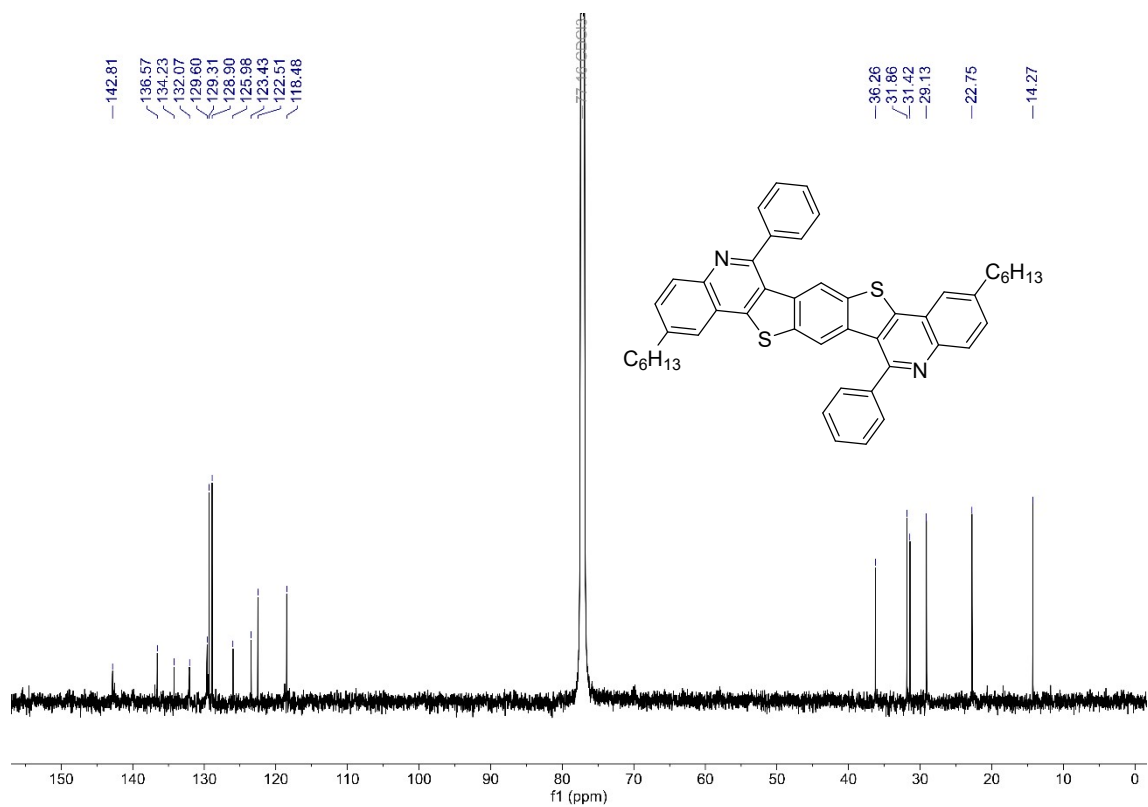

Figure S52.  $^{13}C$   $\{^1H\}$  NMR spectrum (151 MHz,  $CDCl_3$ ) of **9ca**.

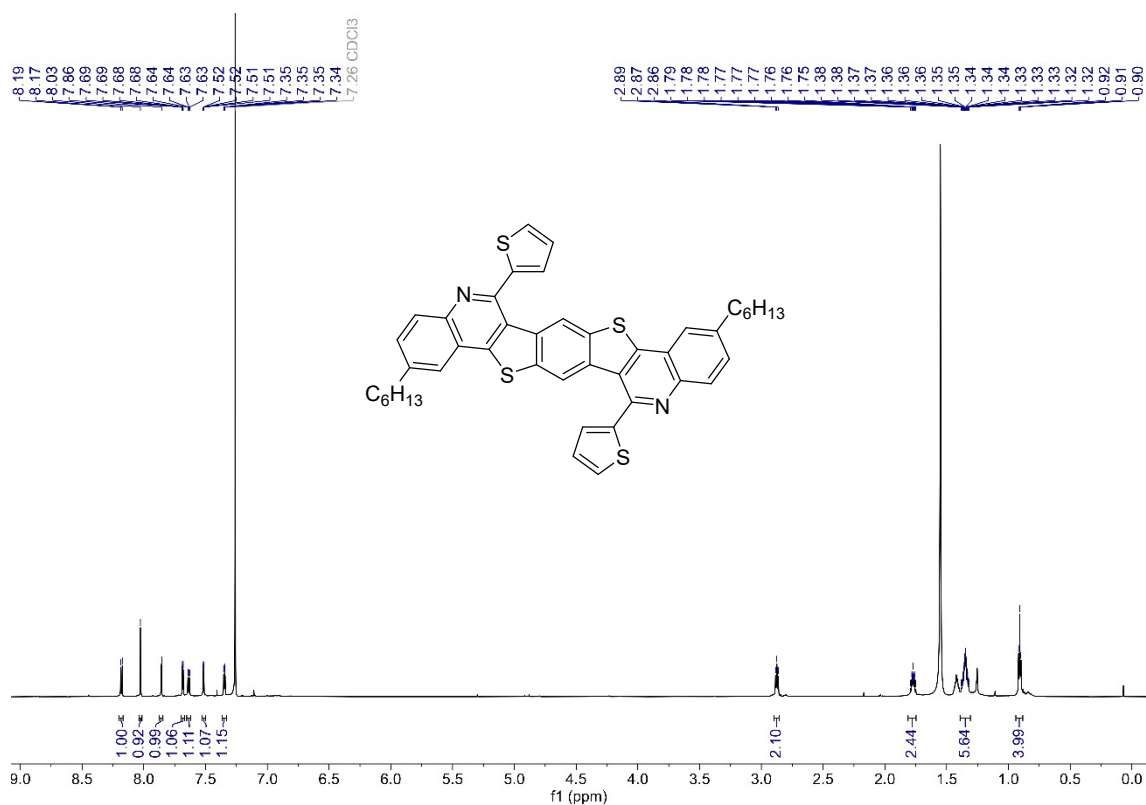

Figure S53. <sup>1</sup>H NMR spectrum (700 MHz, CDCl<sub>3</sub>) of **9cb**.

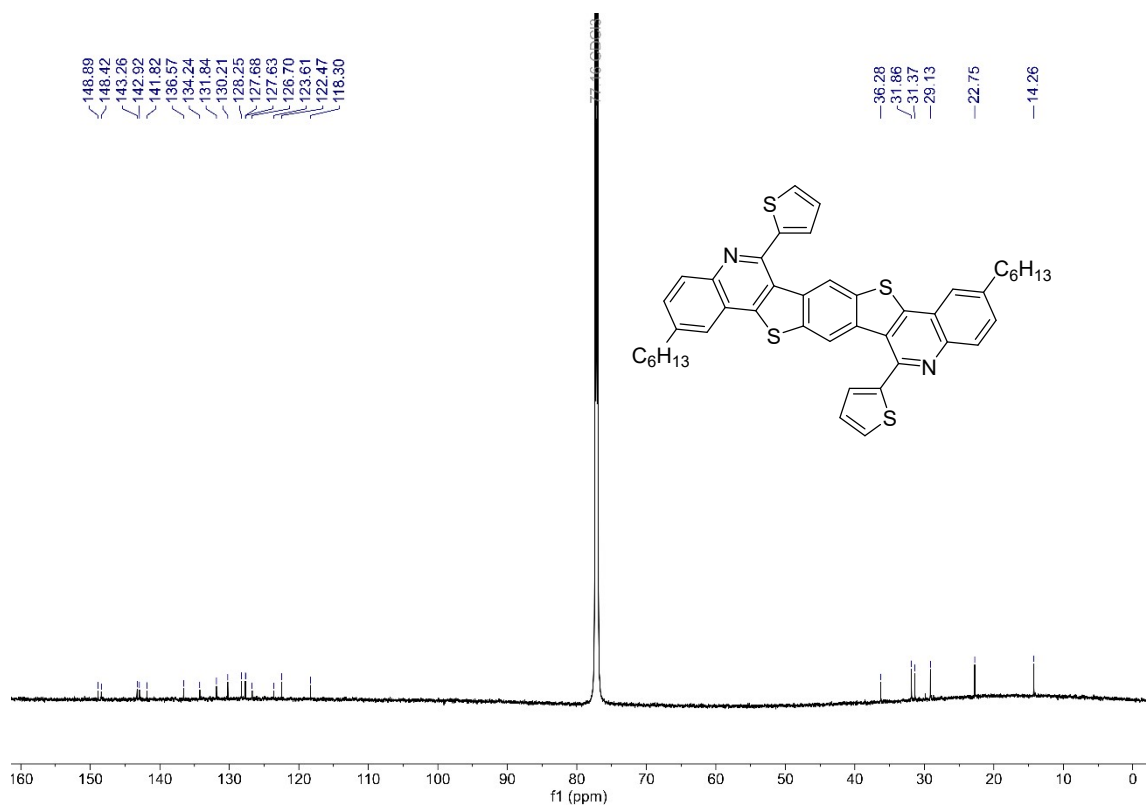

Figure S54. <sup>13</sup>C {<sup>1</sup>H} NMR spectrum (176 MHz, CDCl<sub>3</sub>) of **9cb**.

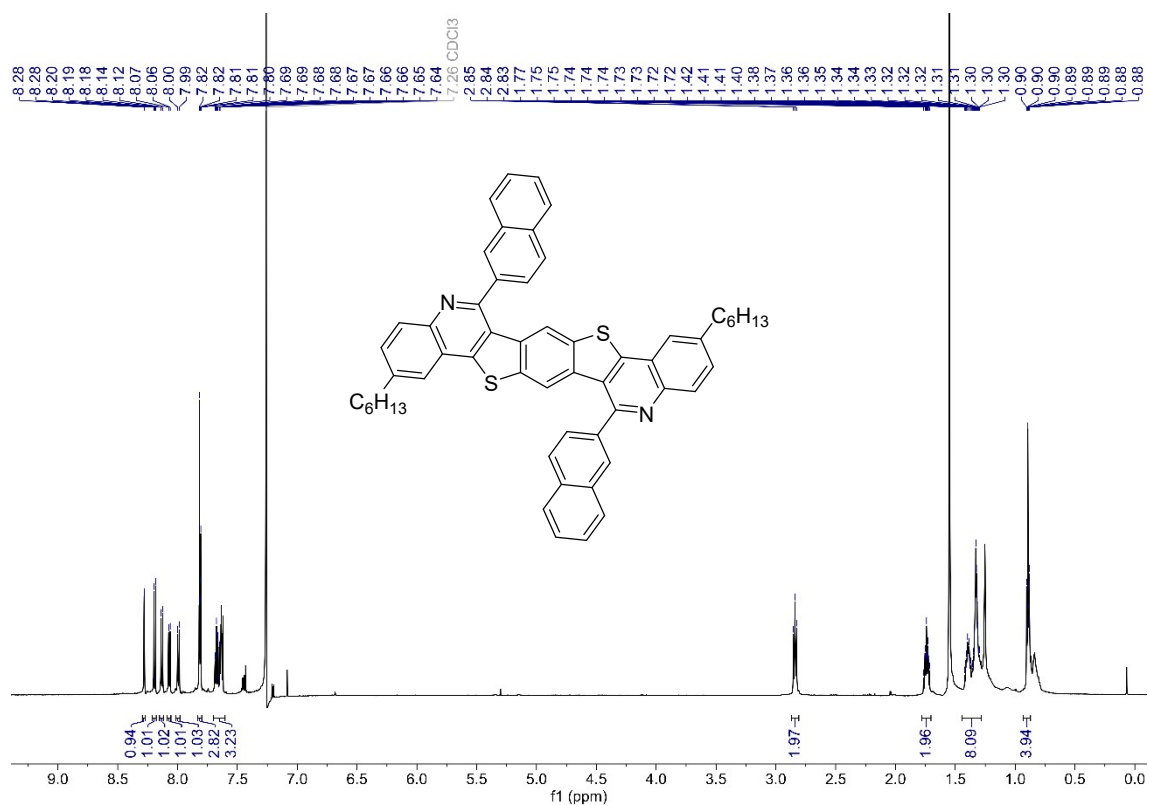

Figure S55. <sup>1</sup>H NMR spectrum (600 MHz, CDCl<sub>3</sub>) of 9cc.

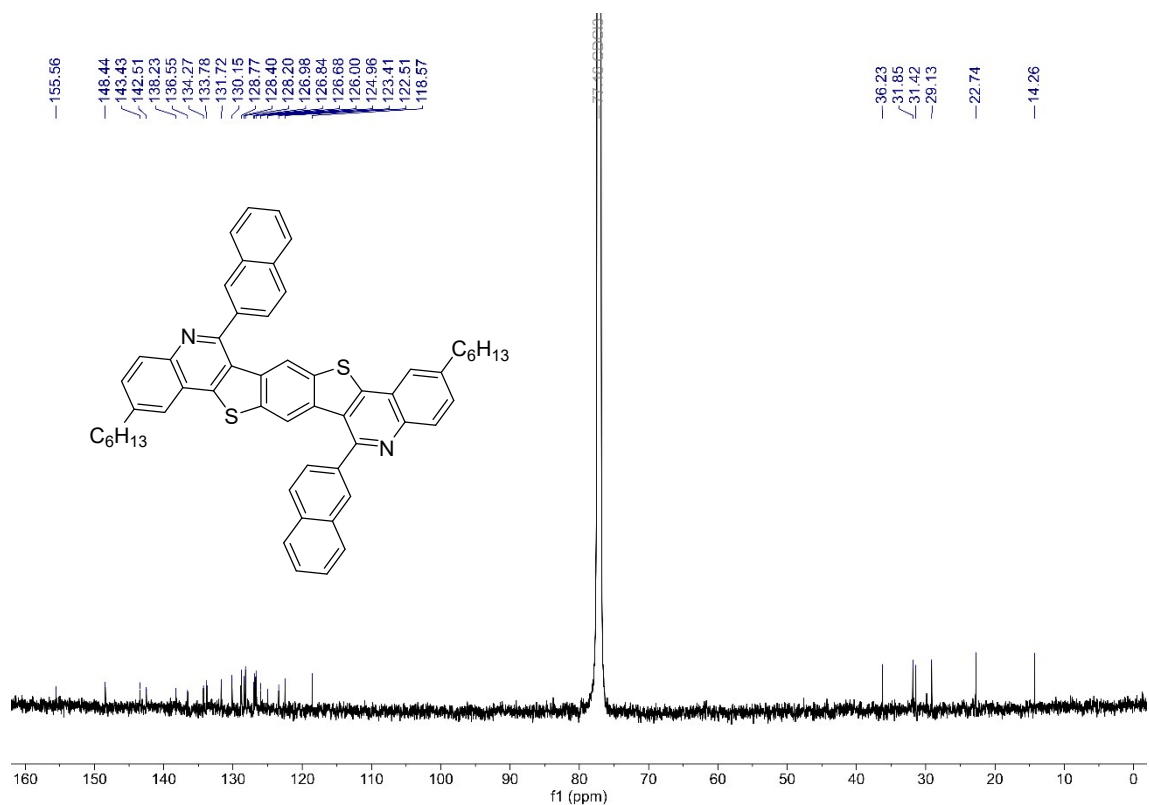

Figure S56. <sup>13</sup>C {<sup>1</sup>H} NMR spectrum (151 MHz, CDCl<sub>3</sub>) of 9cc.

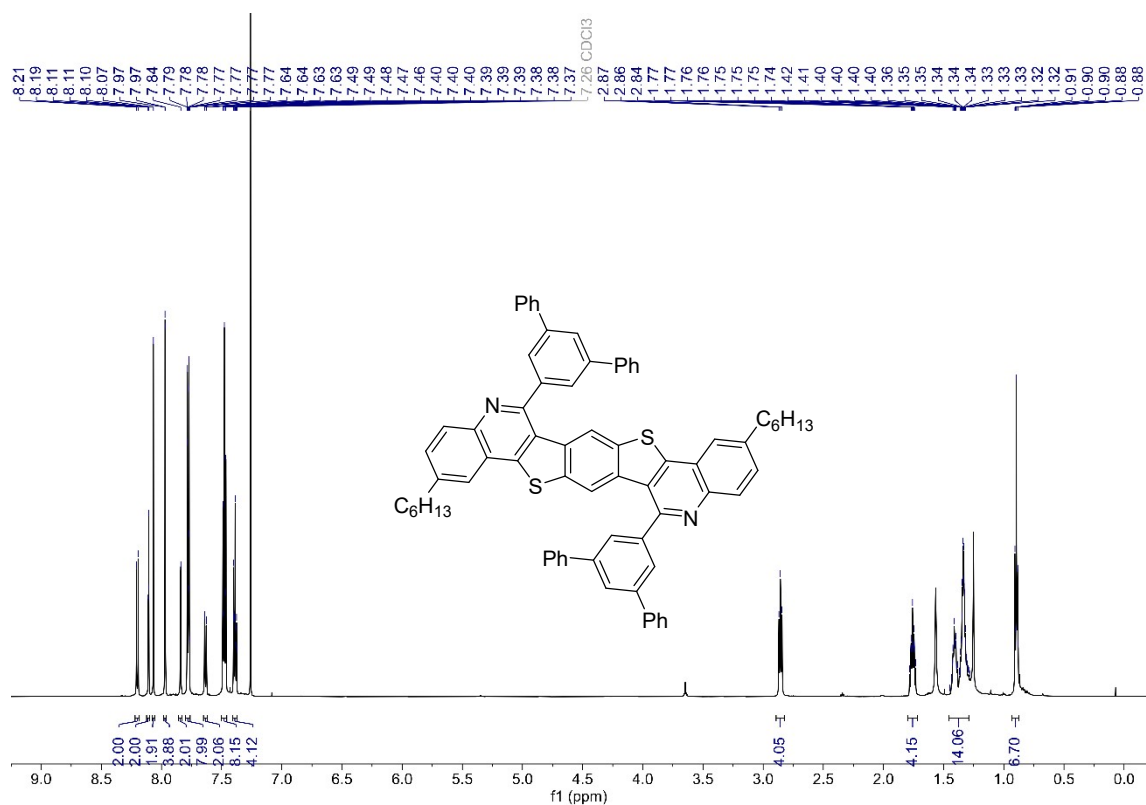

Figure S57. <sup>1</sup>H NMR spectrum (600 MHz, CDCl<sub>3</sub>) of **9cd**.

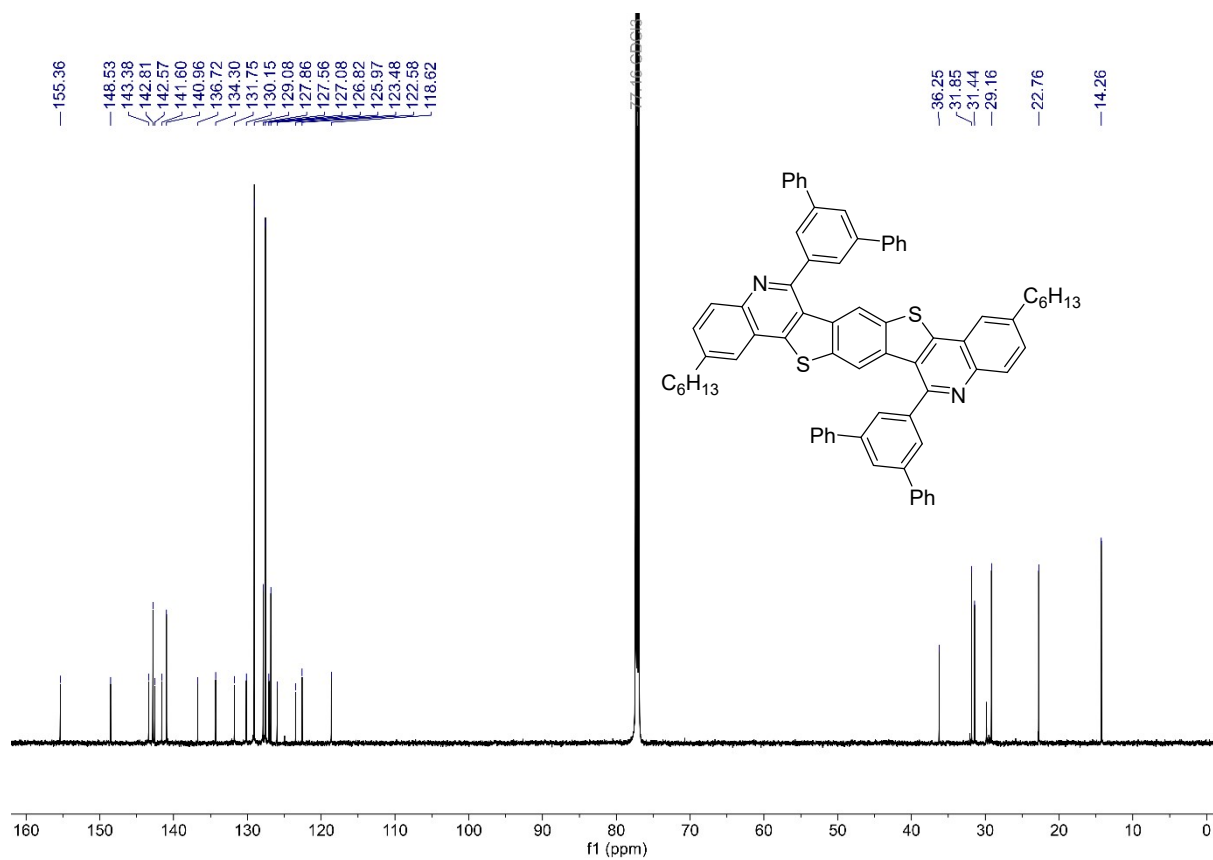

Figure S58. <sup>13</sup>C {<sup>1</sup>H} NMR spectrum (151 MHz, CDCl<sub>3</sub>) of **9cd**.

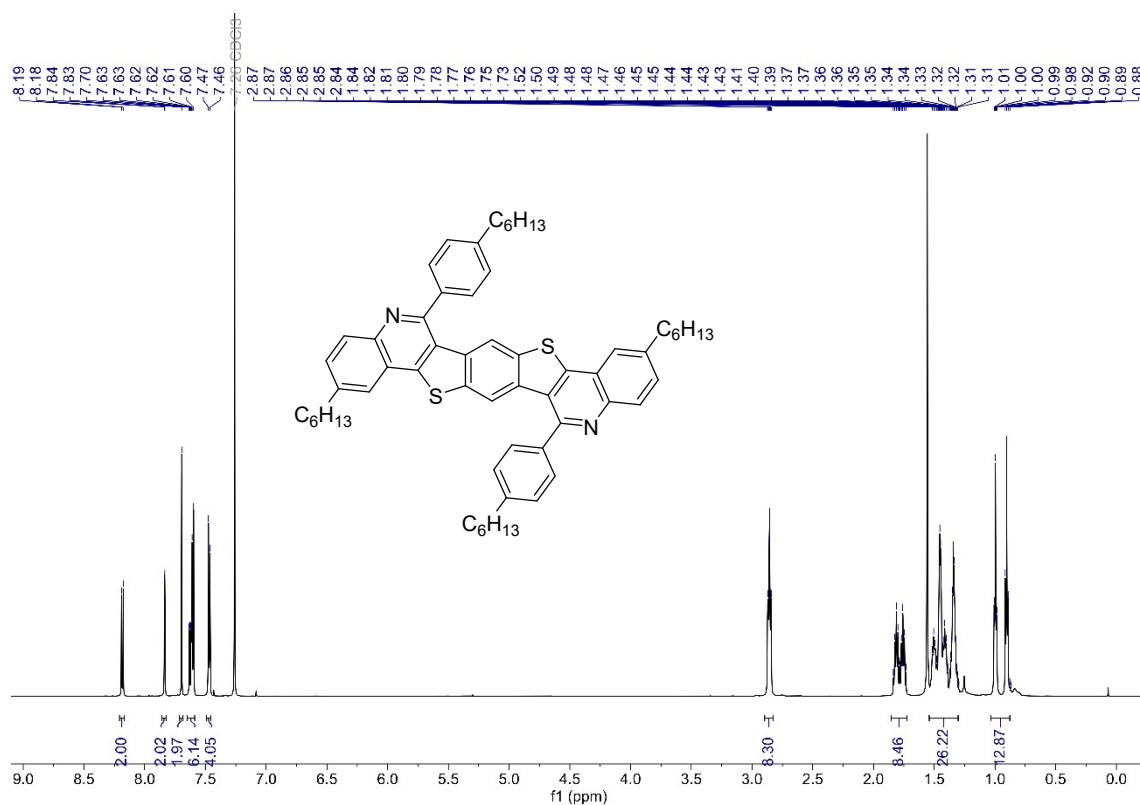

Figure S59.  $^1\text{H}$  NMR spectrum (600 MHz,  $\text{CDCl}_3$ ) of 9ce.

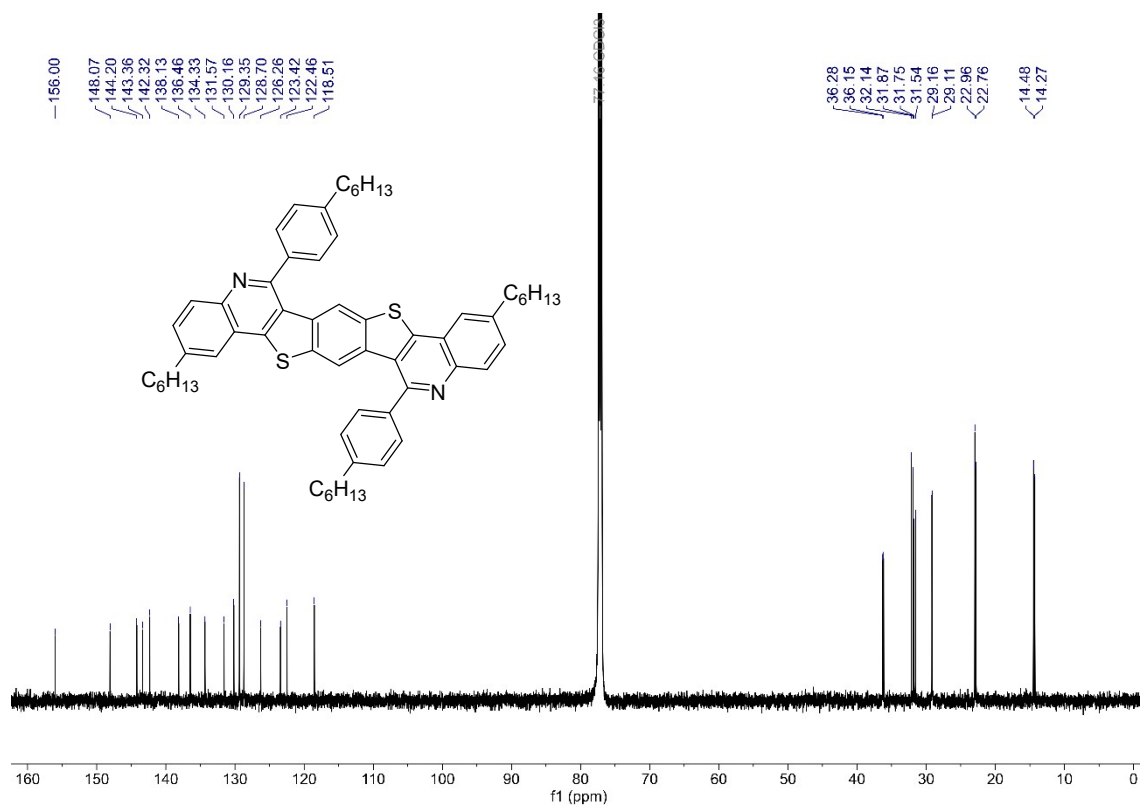

Figure S60.  $^{13}\text{C}\{^1\text{H}\}$  NMR spectrum (151 MHz,  $\text{CDCl}_3$ ) of 9ce.

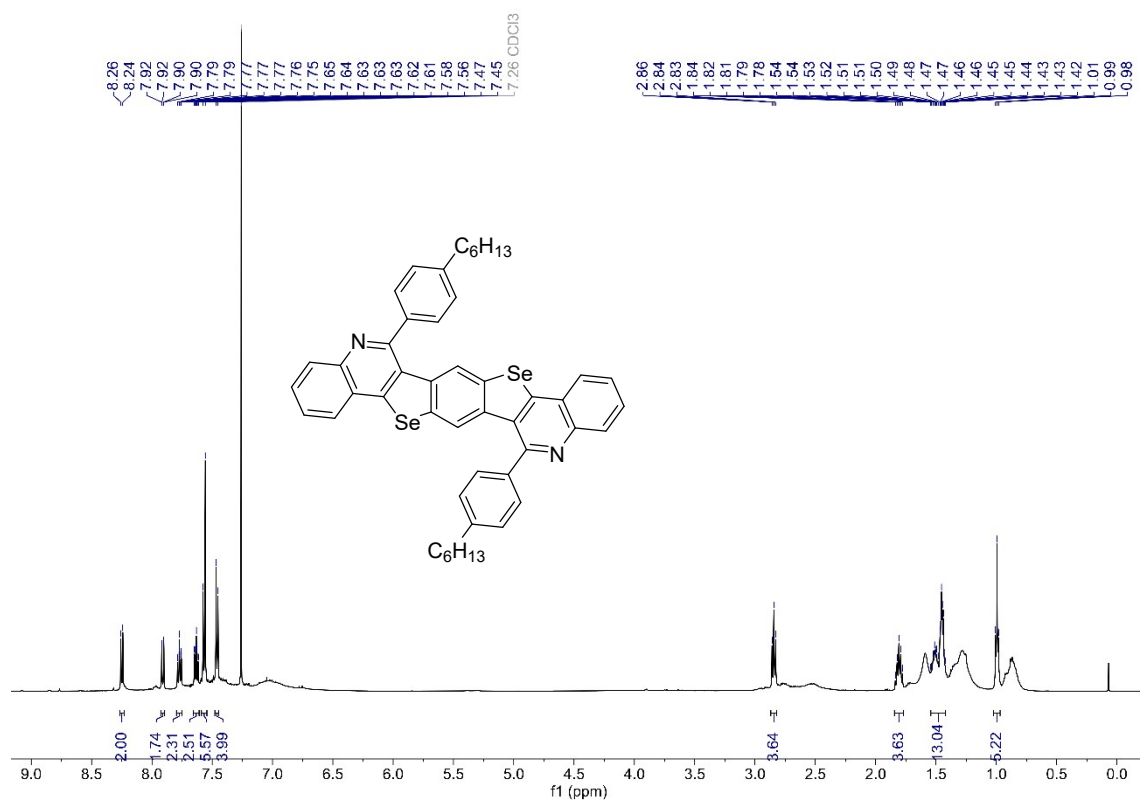

Figure S61. <sup>1</sup>H NMR spectrum (500 MHz, CDCl<sub>3</sub>) of 10aa.

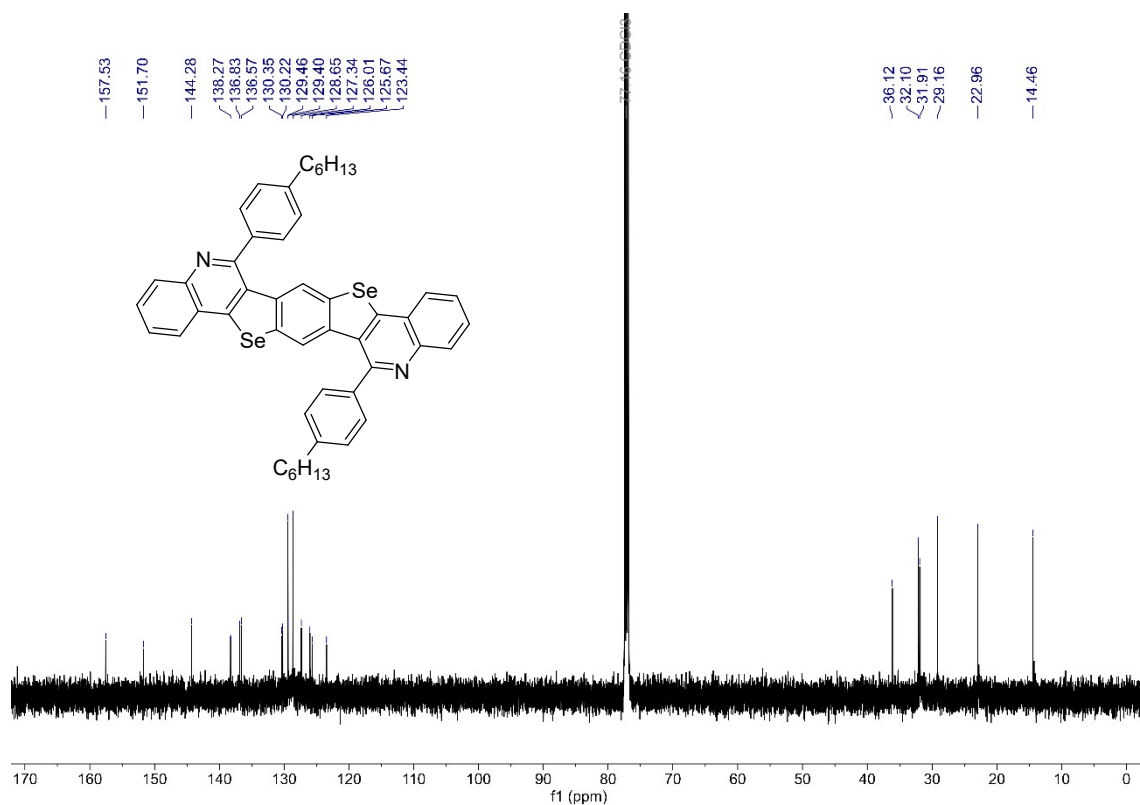

Figure S62. <sup>13</sup>C {<sup>1</sup>H} NMR spectrum (126 MHz, CDCl<sub>3</sub>) of 10aa.



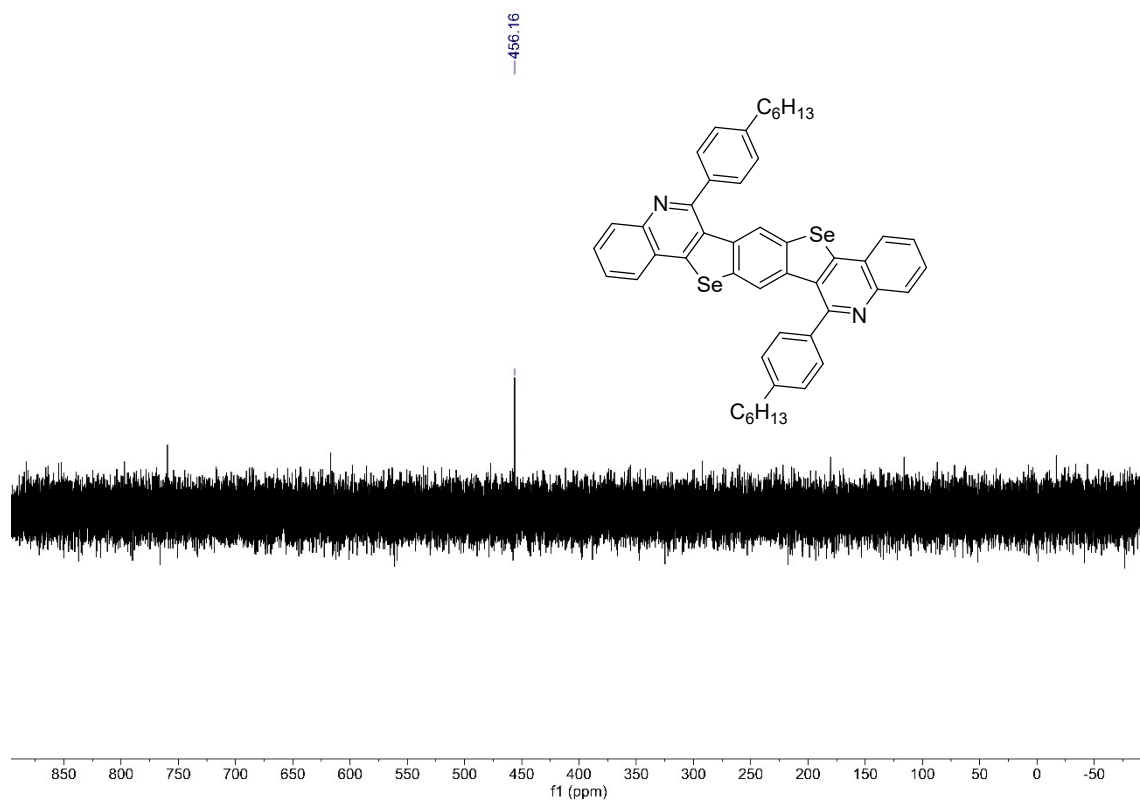

Figure S63.  $^{77}\text{Se}\{^1\text{H}\}$  NMR spectrum (76 MHz,  $\text{CDCl}_3$ ) of **10aa**.

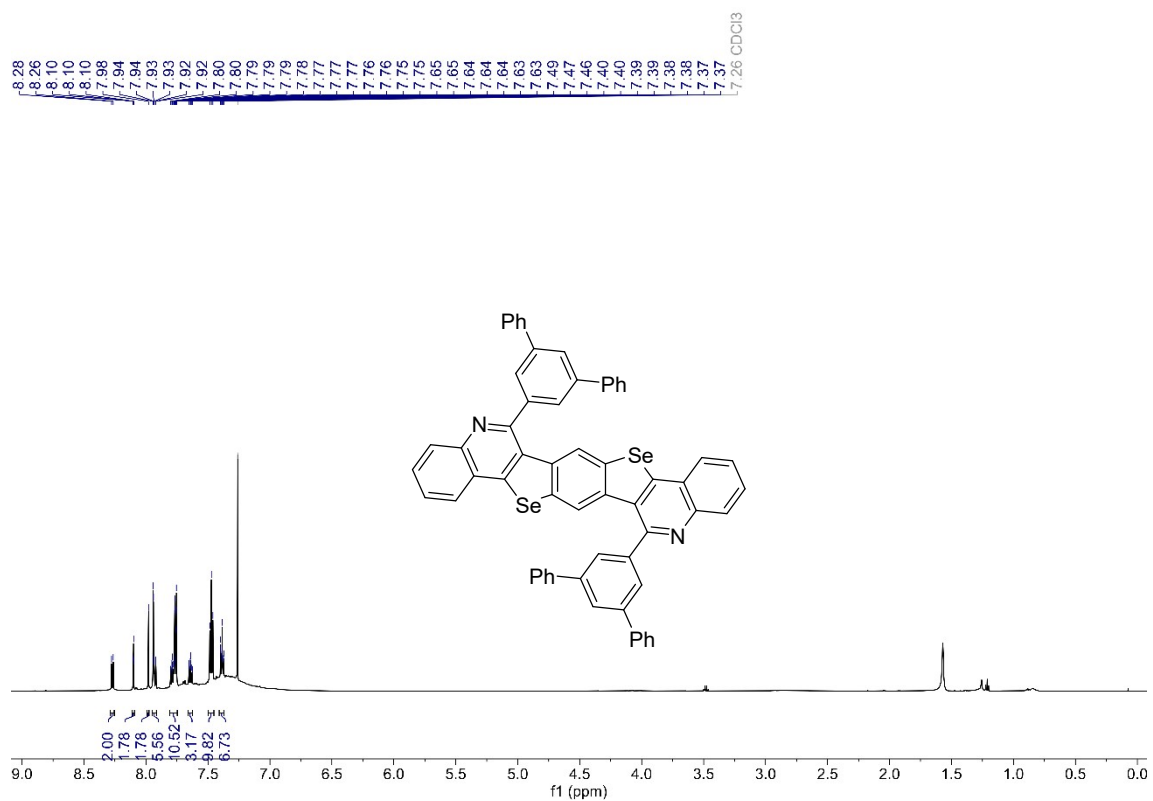

Figure S64.  $^1\text{H}$  NMR spectrum (600 MHz,  $\text{CDCl}_3$ ) of **10ab**.

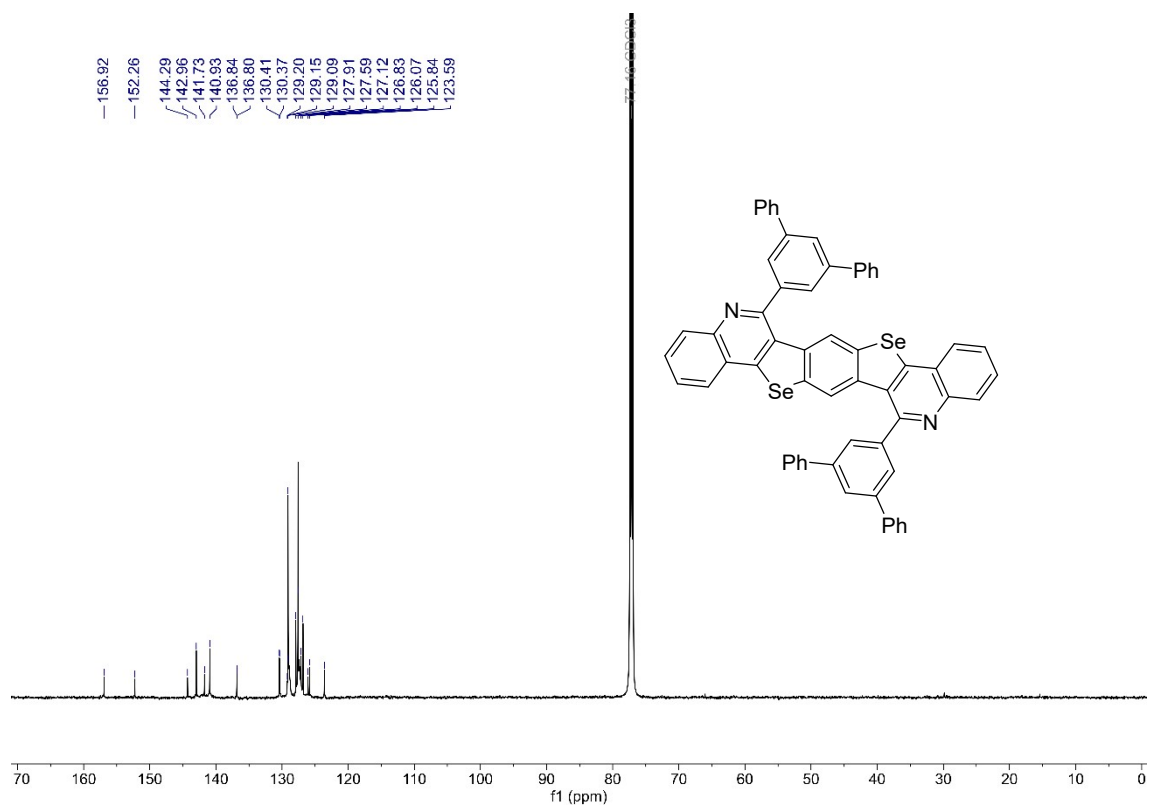

Figure S65.  $^{13}\text{C}\{^1\text{H}\}$  NMR spectrum (151 MHz,  $\text{CDCl}_3$ ) of 10ab.

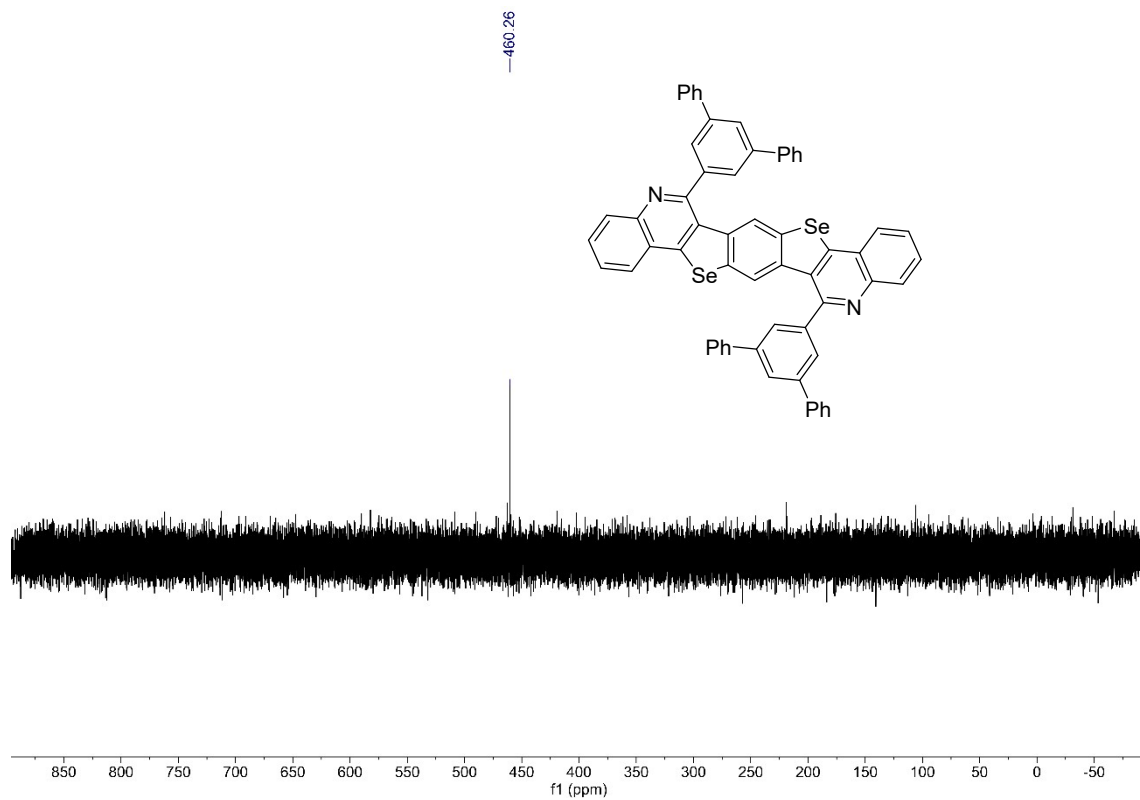

Figure S66.  $^{77}\text{Se}\{^1\text{H}\}$  NMR spectrum (76 MHz,  $\text{CDCl}_3$ ) of 10ab.

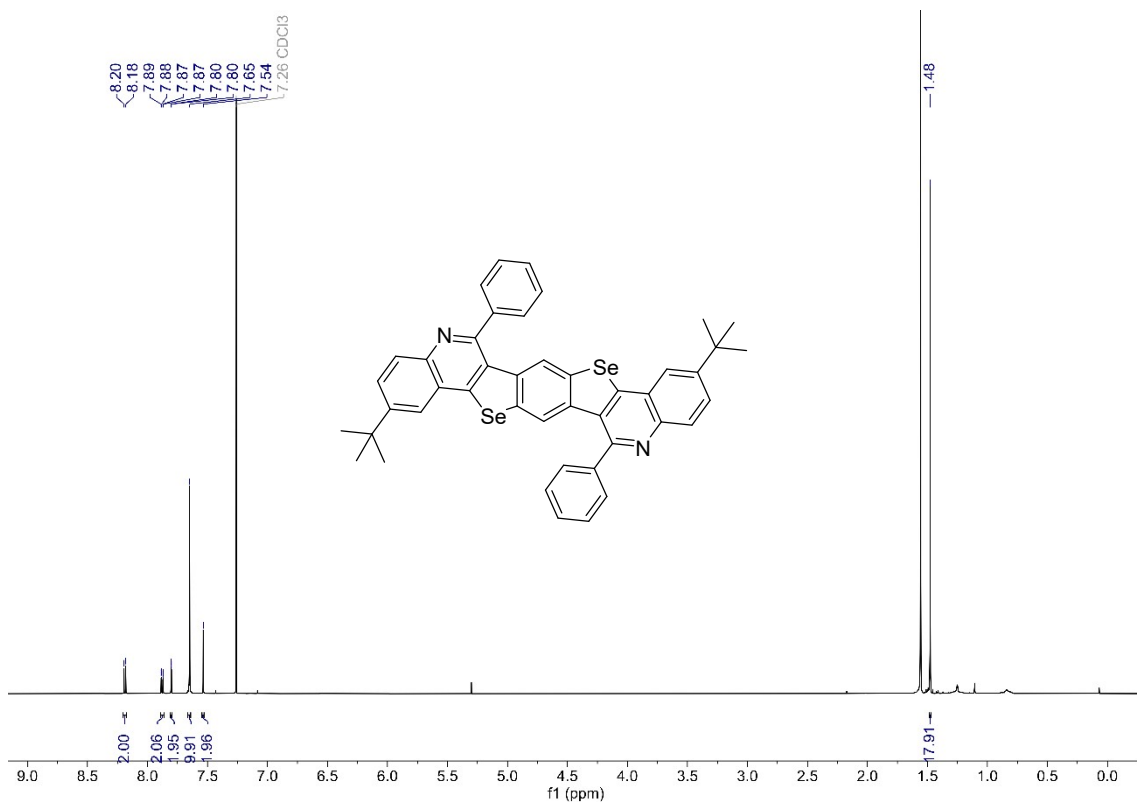

Figure S67.  $^1\text{H}$  NMR spectrum (600 MHz,  $\text{CDCl}_3$ ) of 10ba.

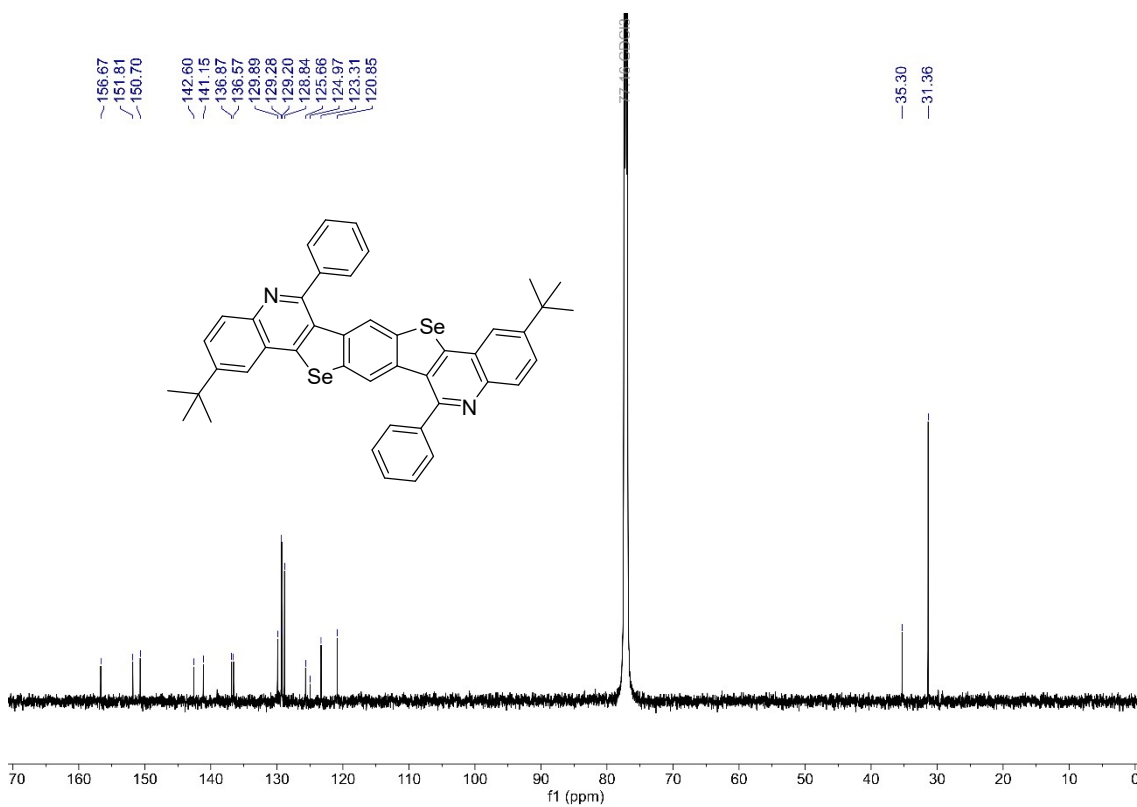

Figure S68.  $^{13}\text{C}\{^1\text{H}\}$  NMR spectrum (151 MHz,  $\text{CDCl}_3$ ) of 10ba.

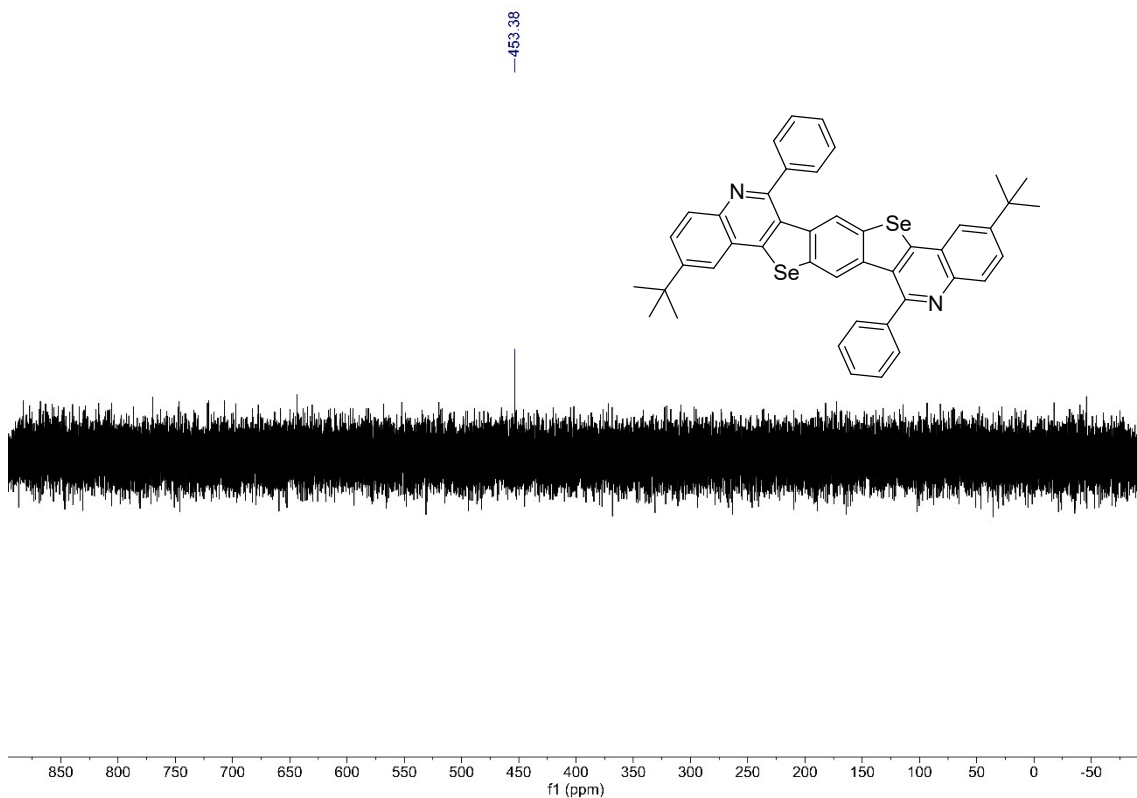

Figure S69.  $^{77}\text{Se}\{^1\text{H}\}$  NMR spectrum (76 MHz,  $\text{CDCl}_3$ ) of 10ba.

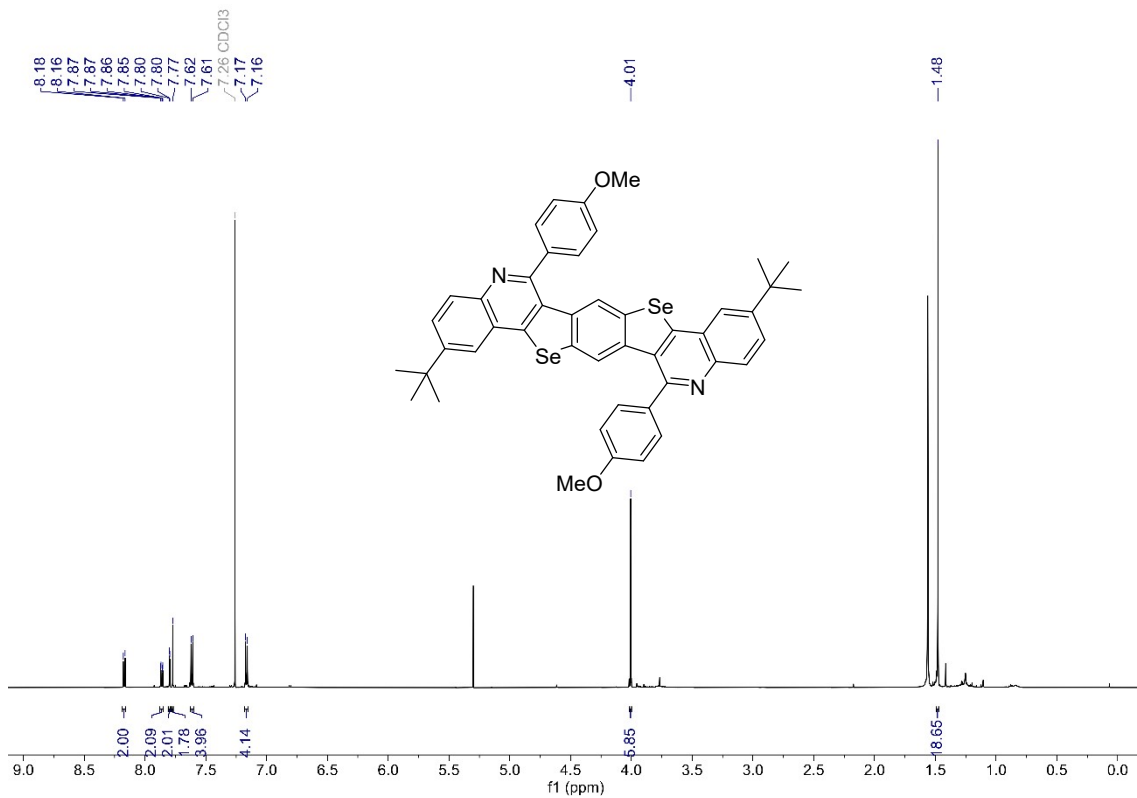

Figure S70.  $^1\text{H}$  NMR spectrum (600 MHz,  $\text{CDCl}_3$ ) of 10bb.

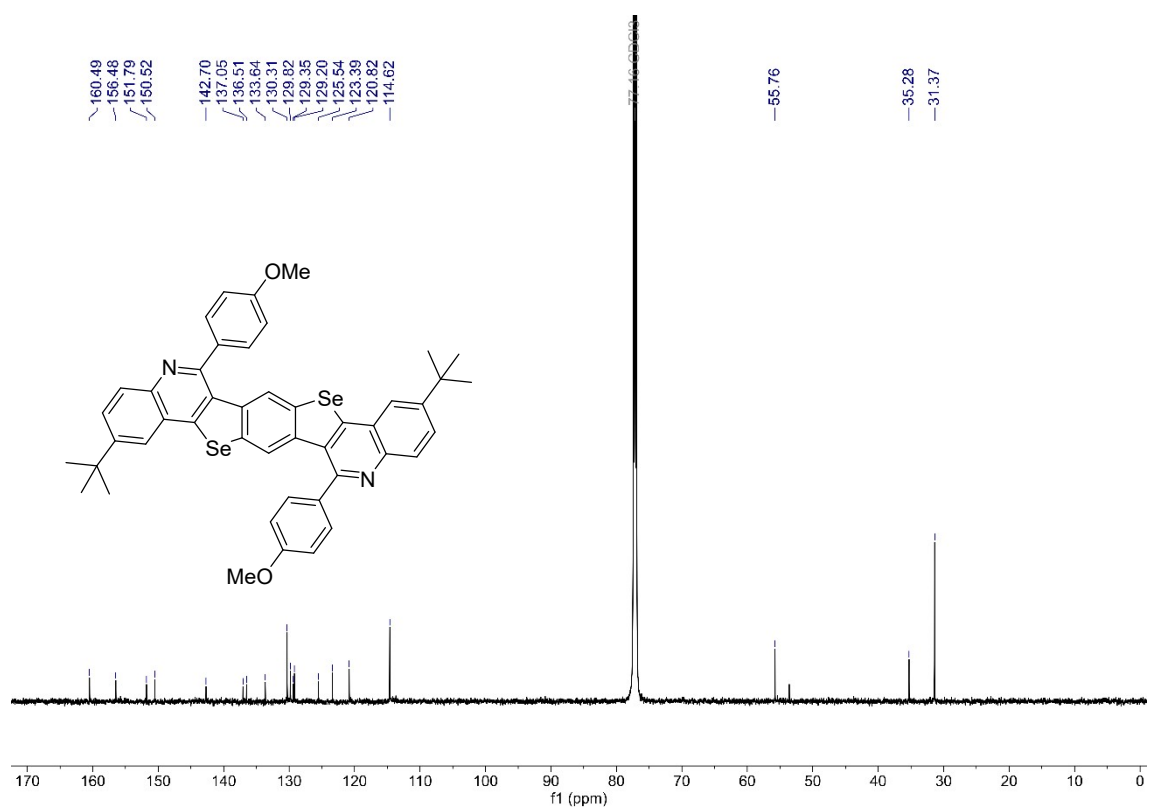

Figure S71.  $^{13}\text{C}\{^1\text{H}\}$  NMR spectrum (151 MHz,  $\text{CDCl}_3$ ) of **10bb**.

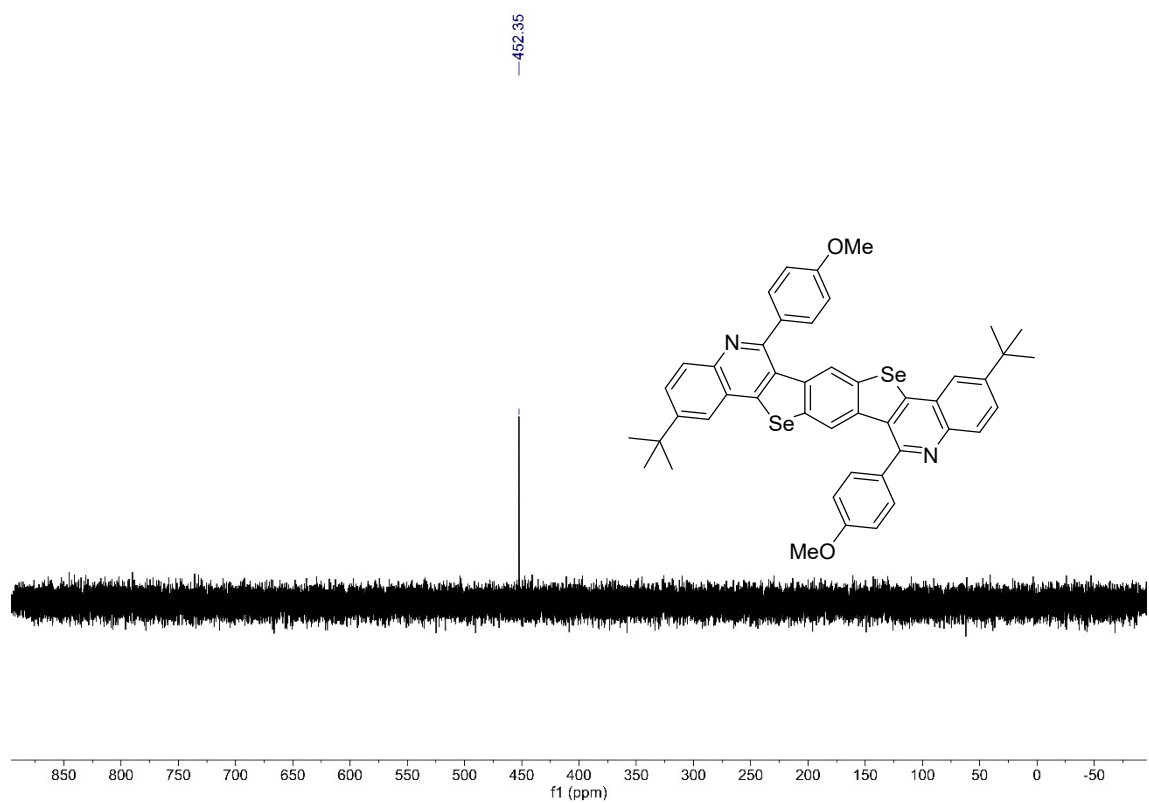

Figure S72.  $^{77}\text{Se}\{^1\text{H}\}$  NMR spectrum (76 MHz,  $\text{CDCl}_3$ ) of **10bb**.

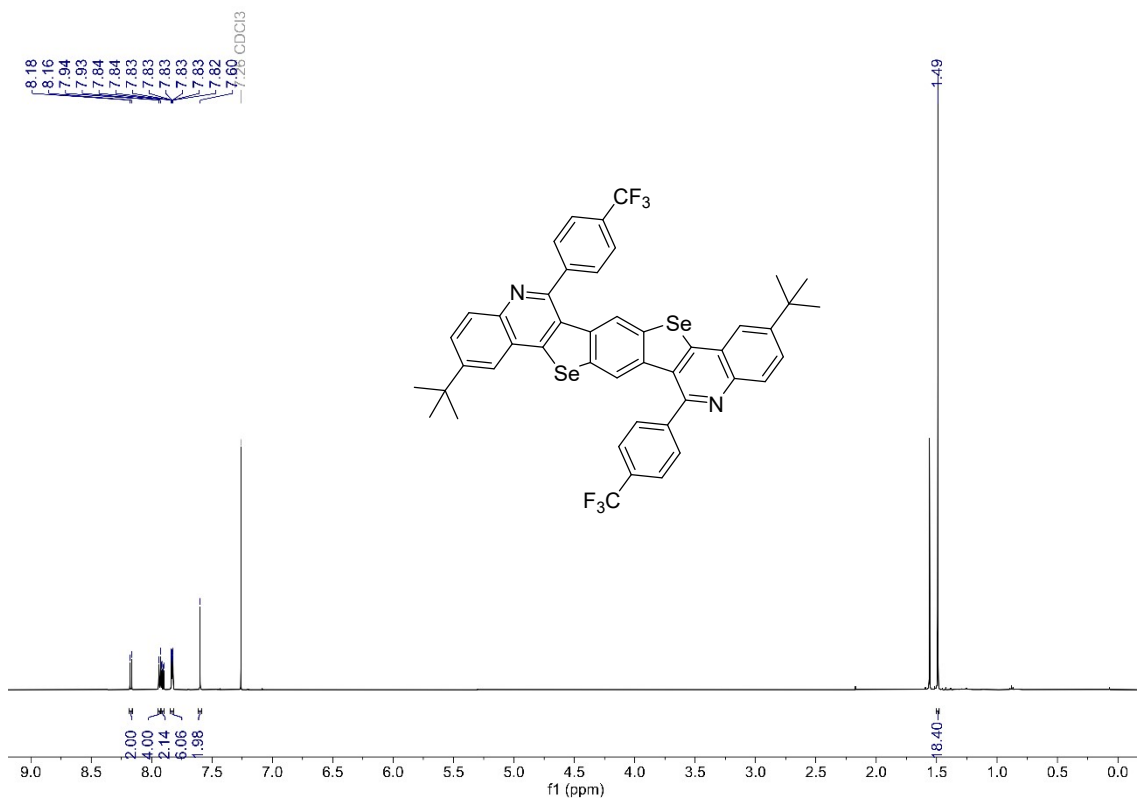

Figure S73. <sup>1</sup>H NMR spectrum (600 MHz, CDCl<sub>3</sub>) of **10bc**.

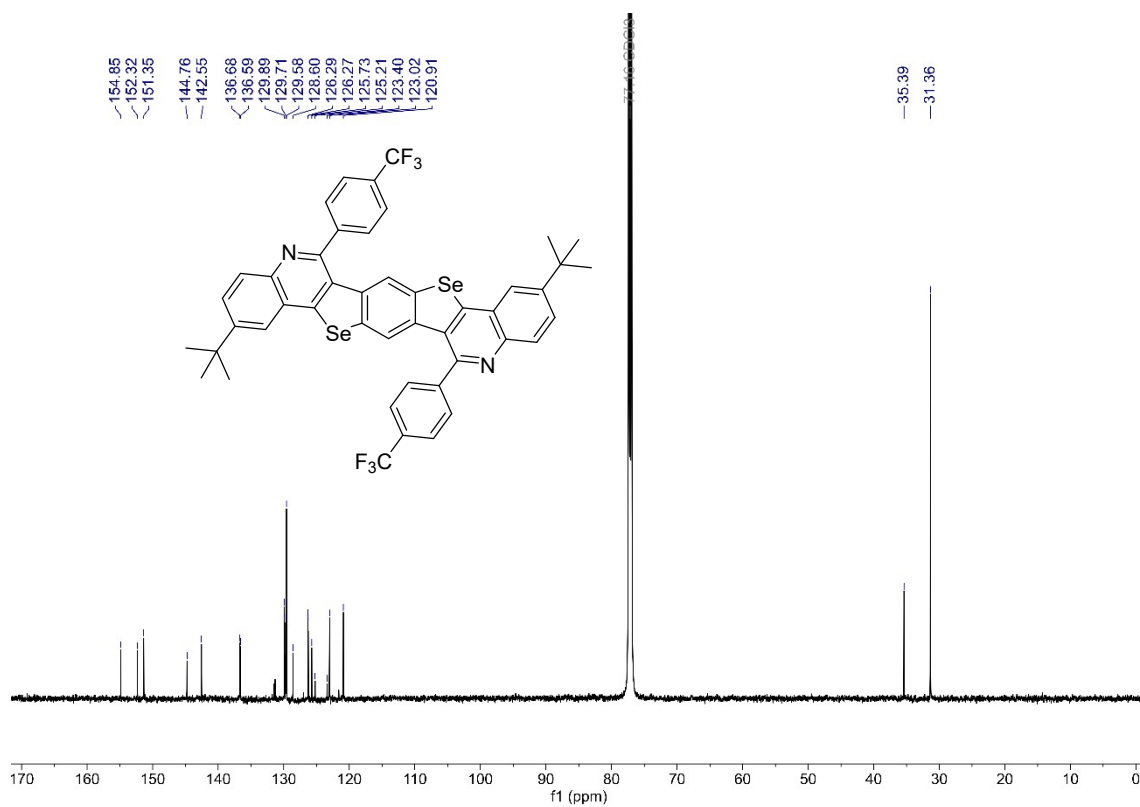

Figure S74. <sup>13</sup>C {<sup>1</sup>H} NMR spectrum (151 MHz, CDCl<sub>3</sub>) of **10bc**.

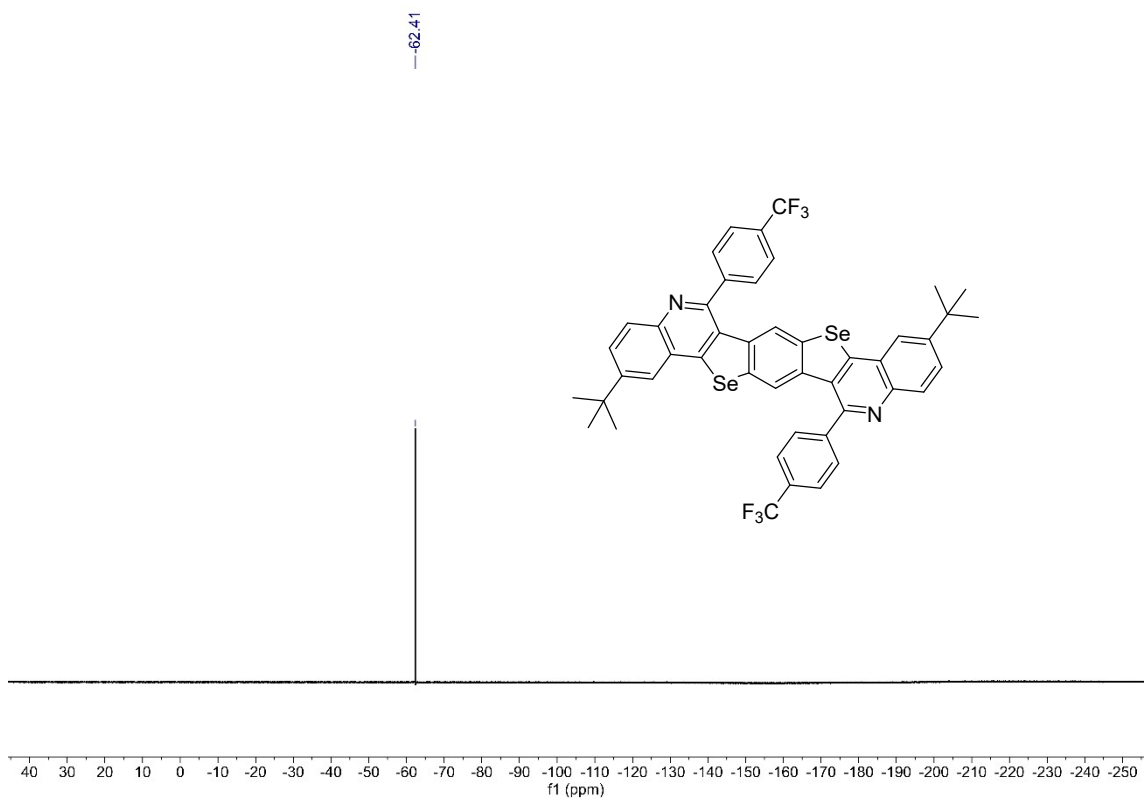

**Figure S75.**  $^{19}\text{F}\{^1\text{H}\}$  NMR spectrum (283 MHz,  $\text{CDCl}_3$ ) of **10bc**.

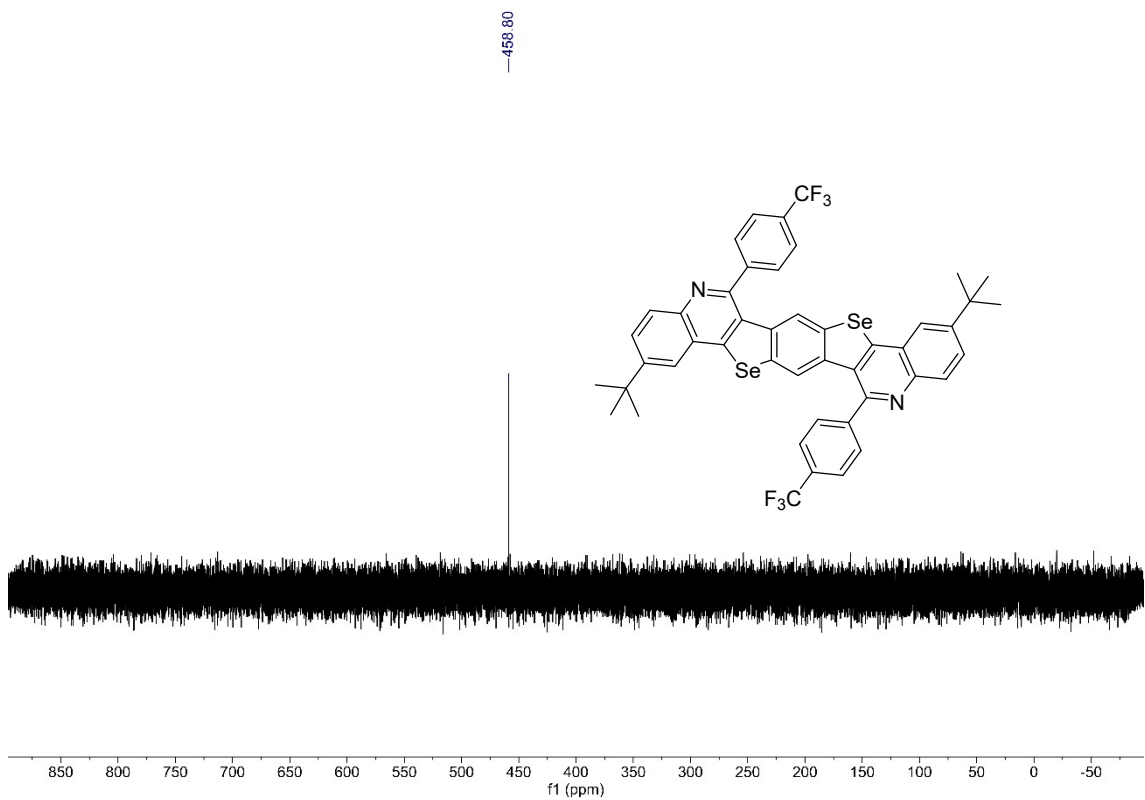

**Figure S76.**  $^{77}\text{Se}\{^1\text{H}\}$  NMR spectrum (76 MHz,  $\text{CDCl}_3$ ) of **10bc**.

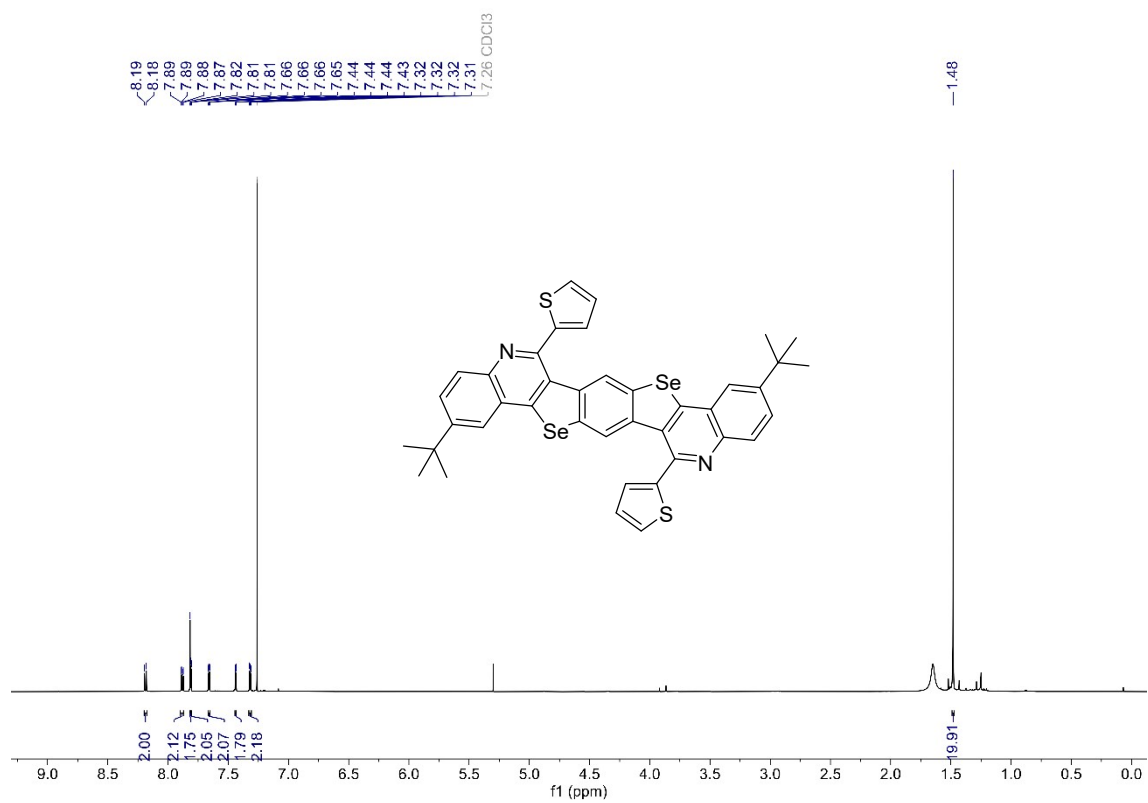

Figure S77.  $^1\text{H}$  NMR spectrum (600 MHz,  $\text{CDCl}_3$ ) of 10bd.

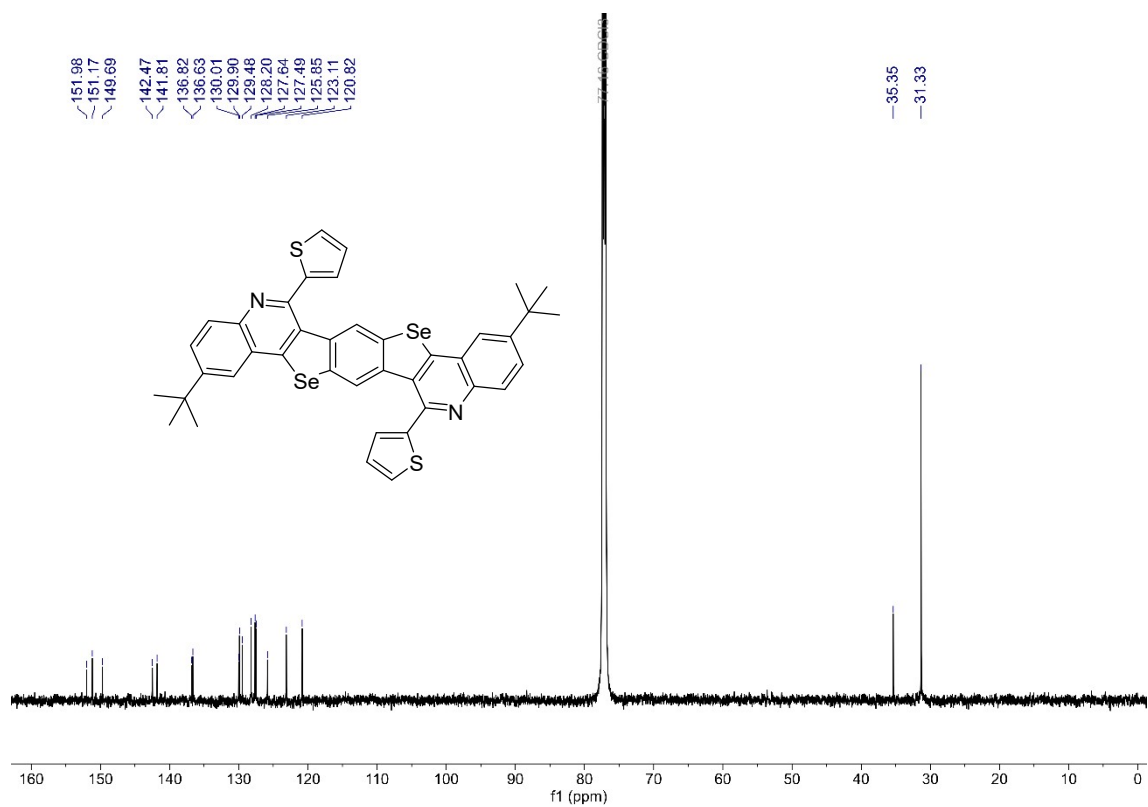

Figure S78.  $^{13}\text{C}\{^1\text{H}\}$  NMR spectrum (151 MHz,  $\text{CDCl}_3$ ) of 10bd.



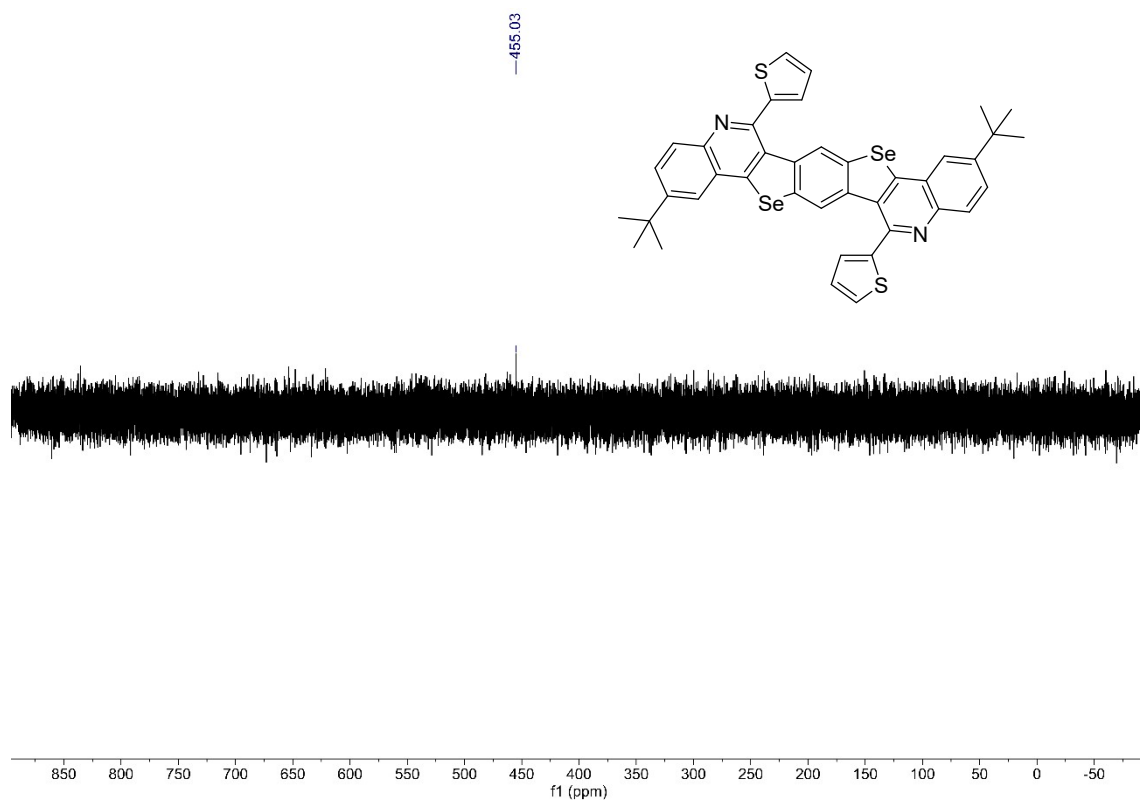

**Figure S79.**  $^{77}\text{Se}\{^1\text{H}\}$  NMR spectrum (76 MHz,  $\text{CDCl}_3$ ) of **10bd**.

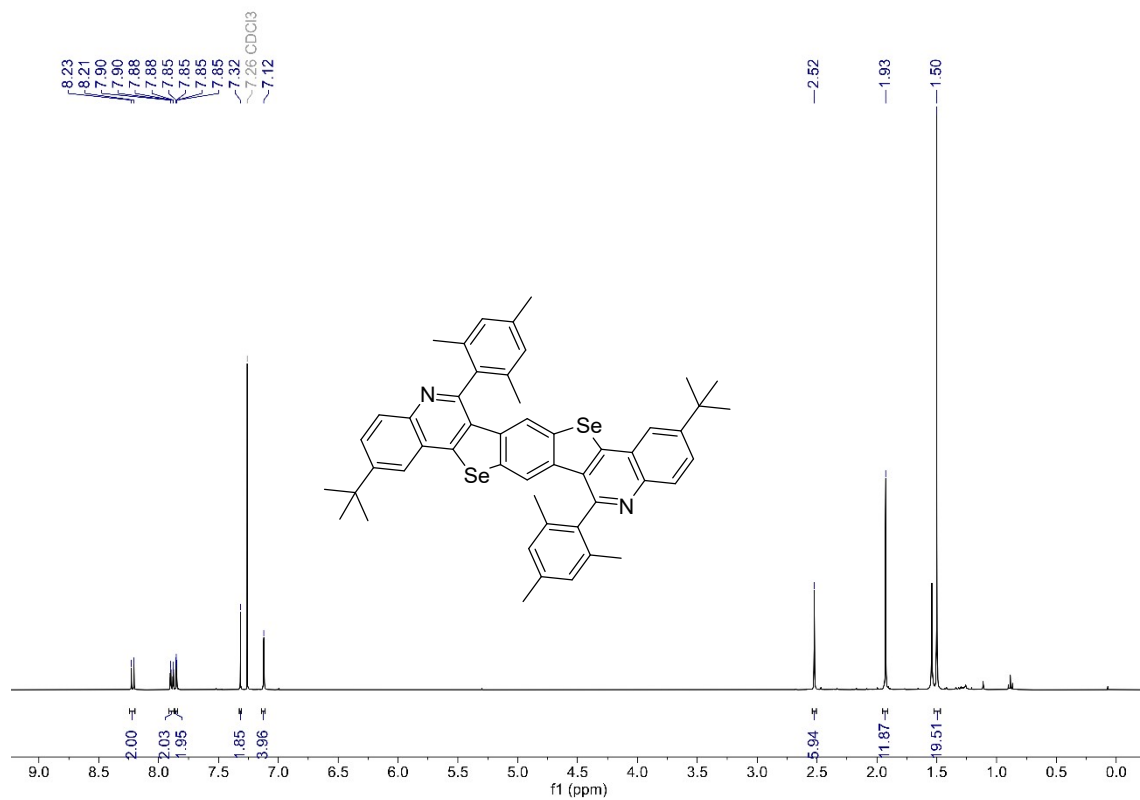

**Figure S80.**  $^1\text{H}$  NMR spectrum (400 MHz,  $\text{CDCl}_3$ ) of **10be**.

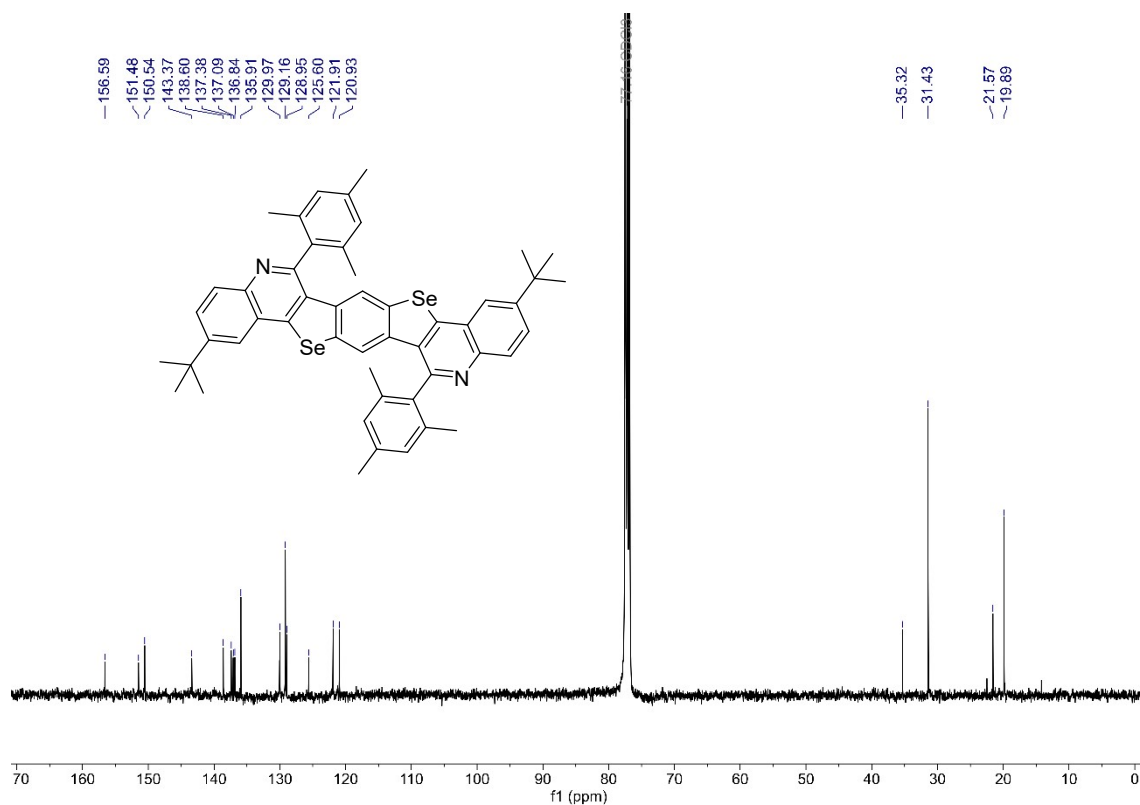

Figure S81.  $^{13}\text{C}\{^1\text{H}\}$  NMR spectrum (101 MHz,  $\text{CDCl}_3$ ) of 10be.

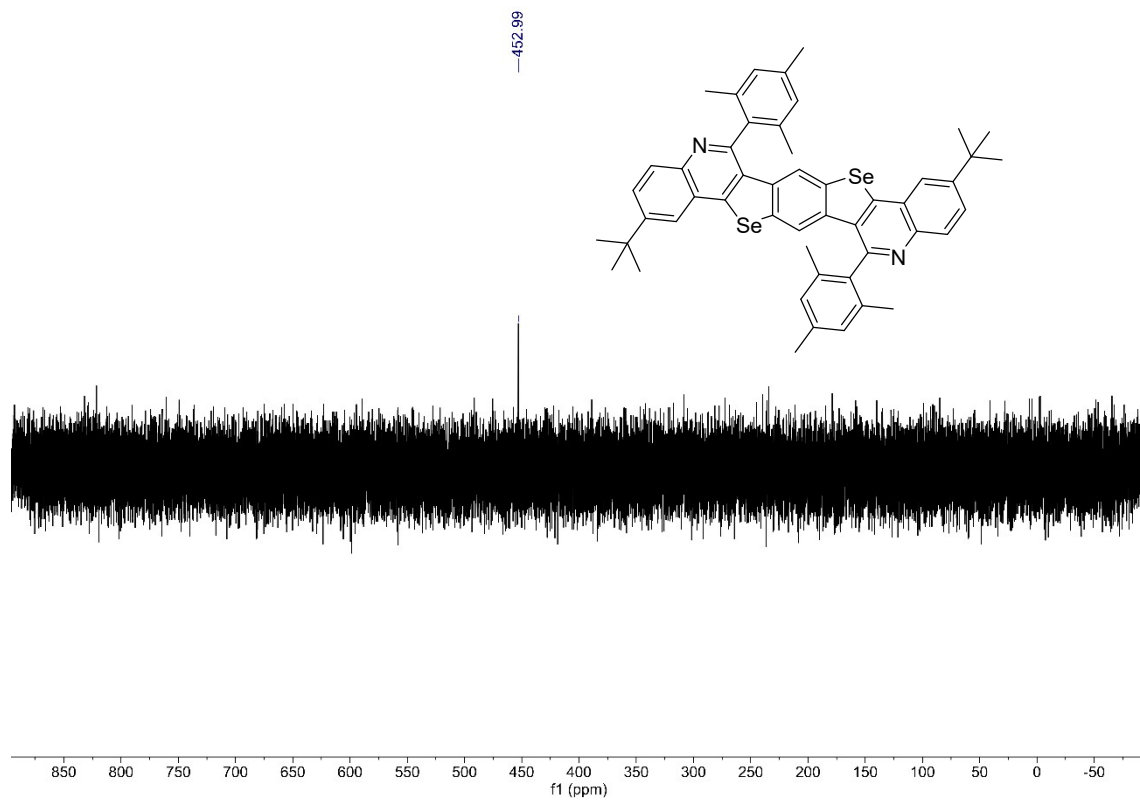

Figure S82.  $^{77}\text{Se}\{^1\text{H}\}$  NMR spectrum (76 MHz,  $\text{CDCl}_3$ ) of 10be.

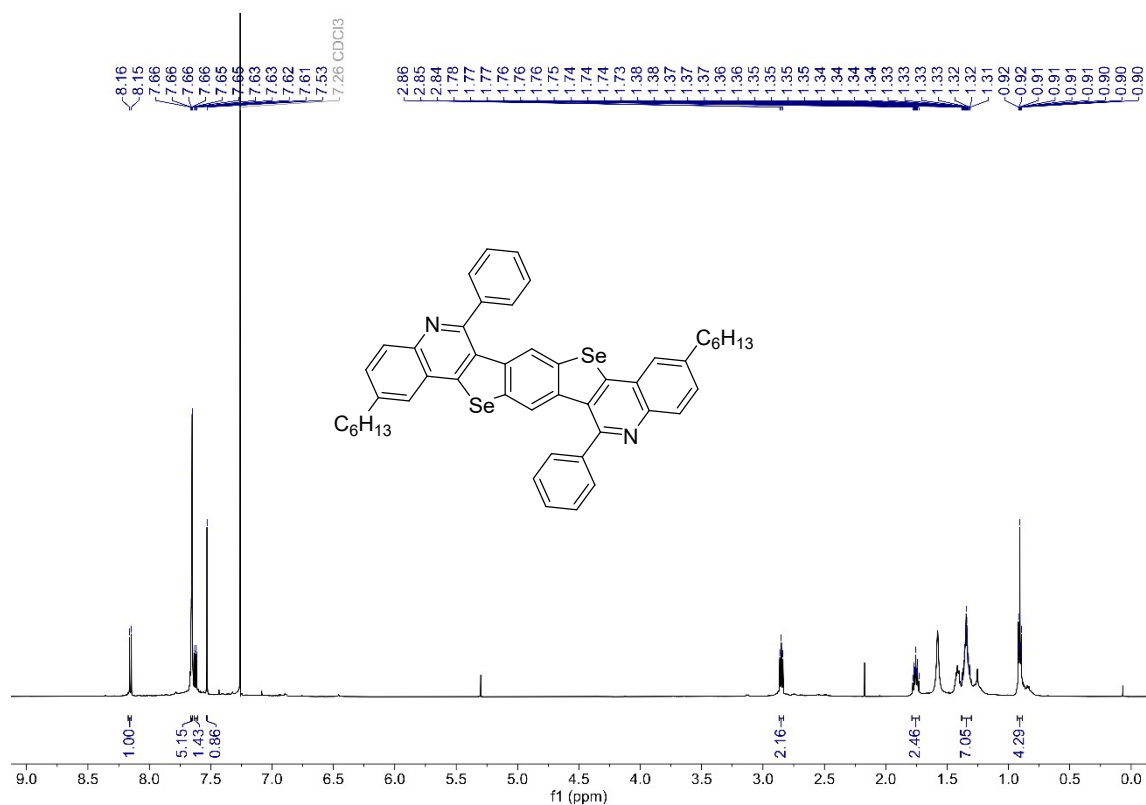

Figure S83.  $^1\text{H}$  NMR spectrum (600 MHz,  $\text{CDCl}_3$ ) of 10ca.

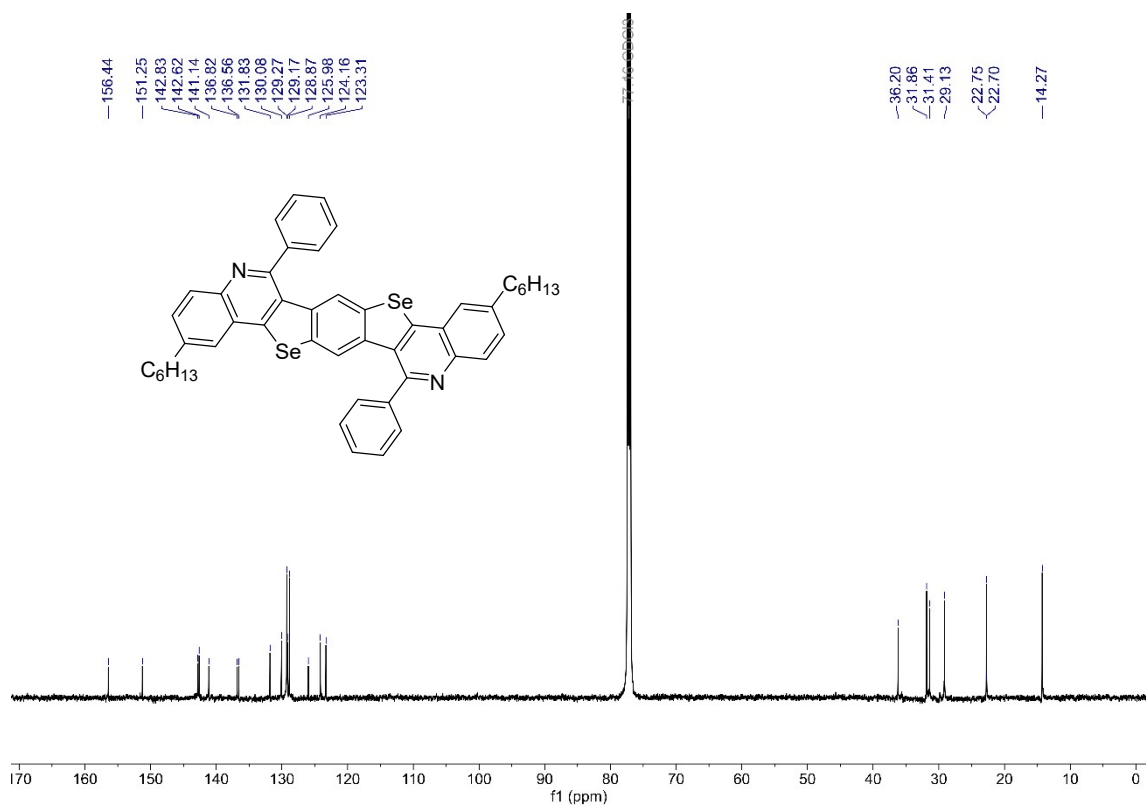

Figure S84.  $^{13}\text{C}$   $\{^1\text{H}\}$  NMR spectrum (151 MHz,  $\text{CDCl}_3$ ) of 10ca.

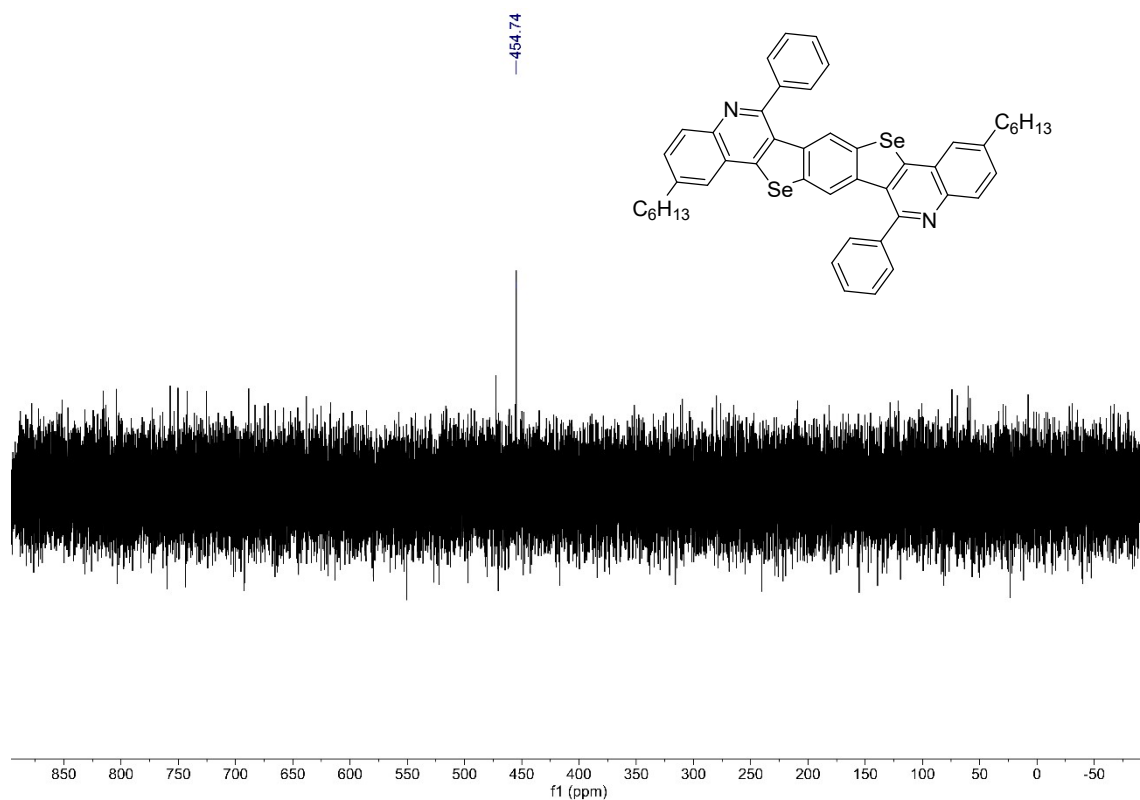

Figure S85.  $^{77}\text{Se}\{^1\text{H}\}$  NMR spectrum (76 MHz,  $\text{CDCl}_3$ ) of 10ca.

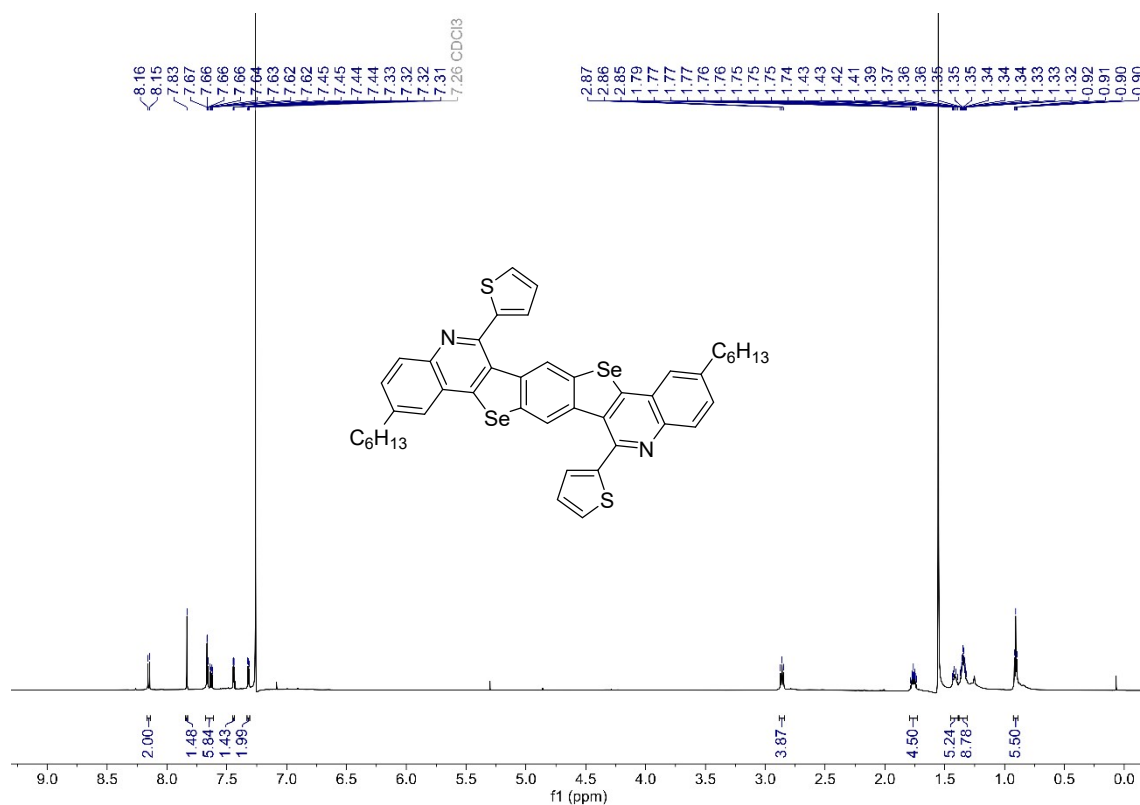

Figure S86.  $^1\text{H}$  NMR spectrum (600 MHz,  $\text{CDCl}_3$ ) of 10cb.

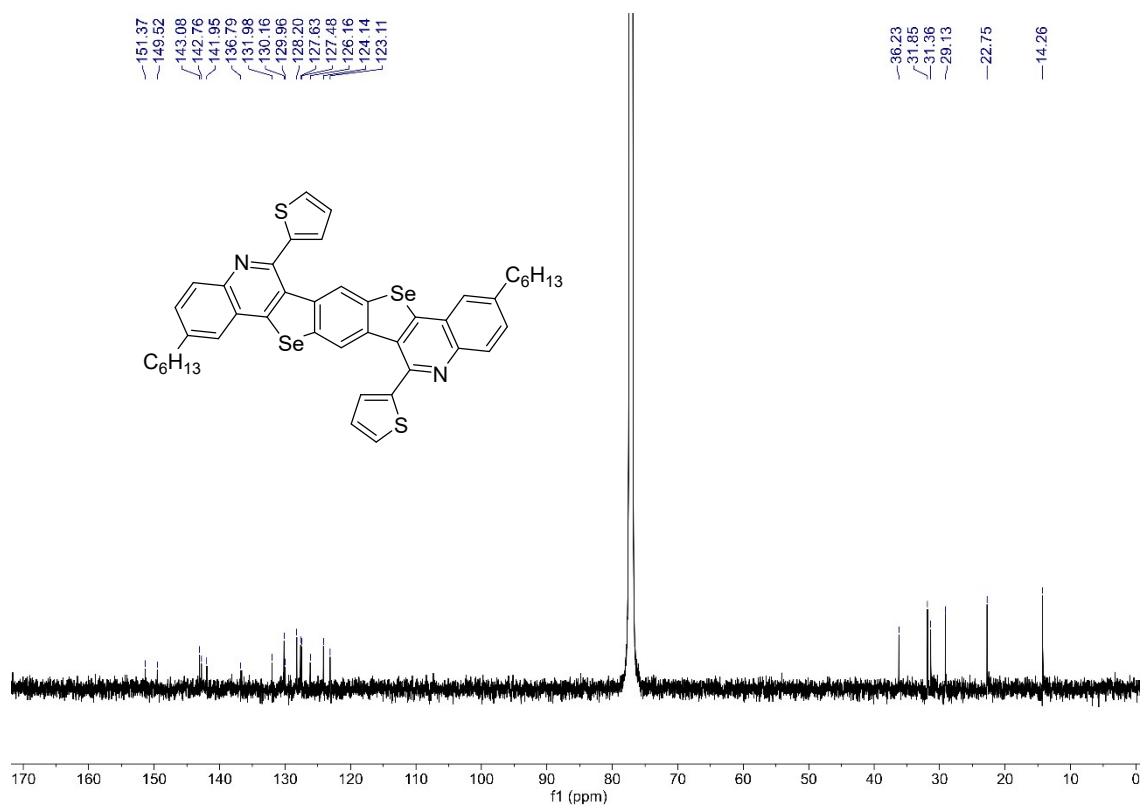

**Figure S87.**  $^{13}\text{C}\{^1\text{H}\}$  NMR spectrum (151 MHz,  $\text{CDCl}_3$ ) of **10cb**.

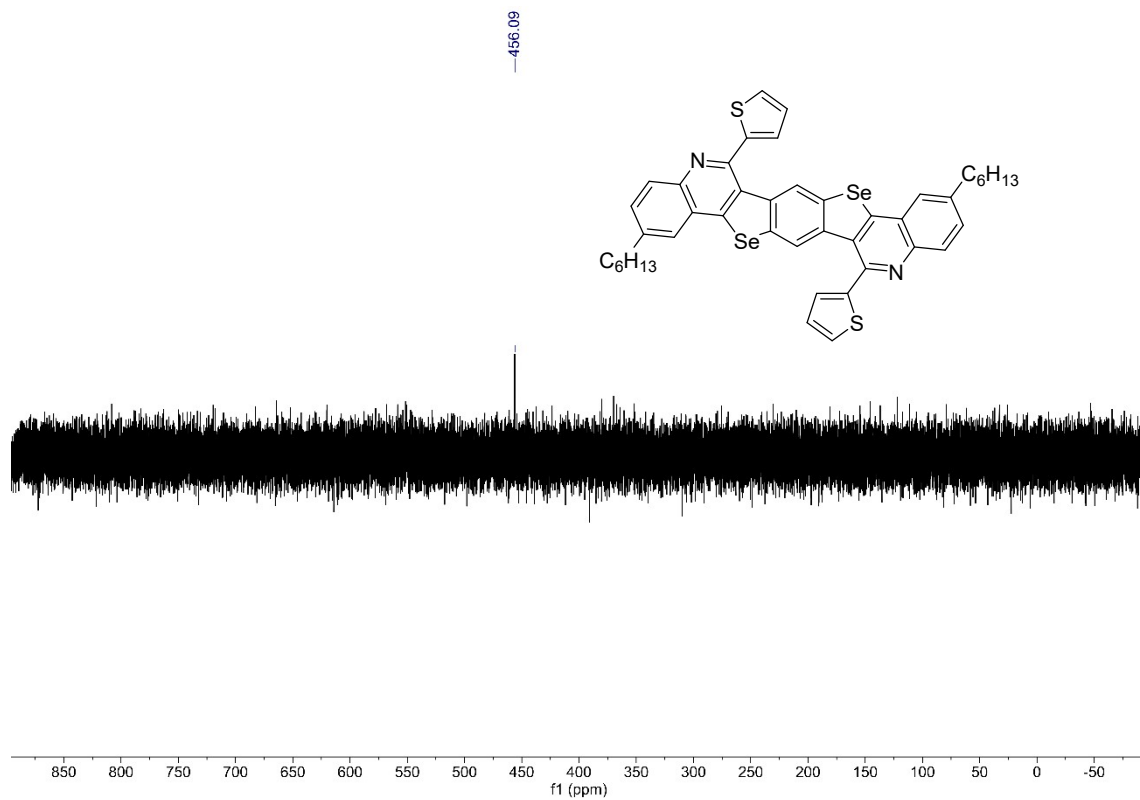

**Figure S88.**  $^{77}\text{Se}\{^1\text{H}\}$  NMR spectrum (76 MHz,  $\text{CDCl}_3$ ) of **10cb**.

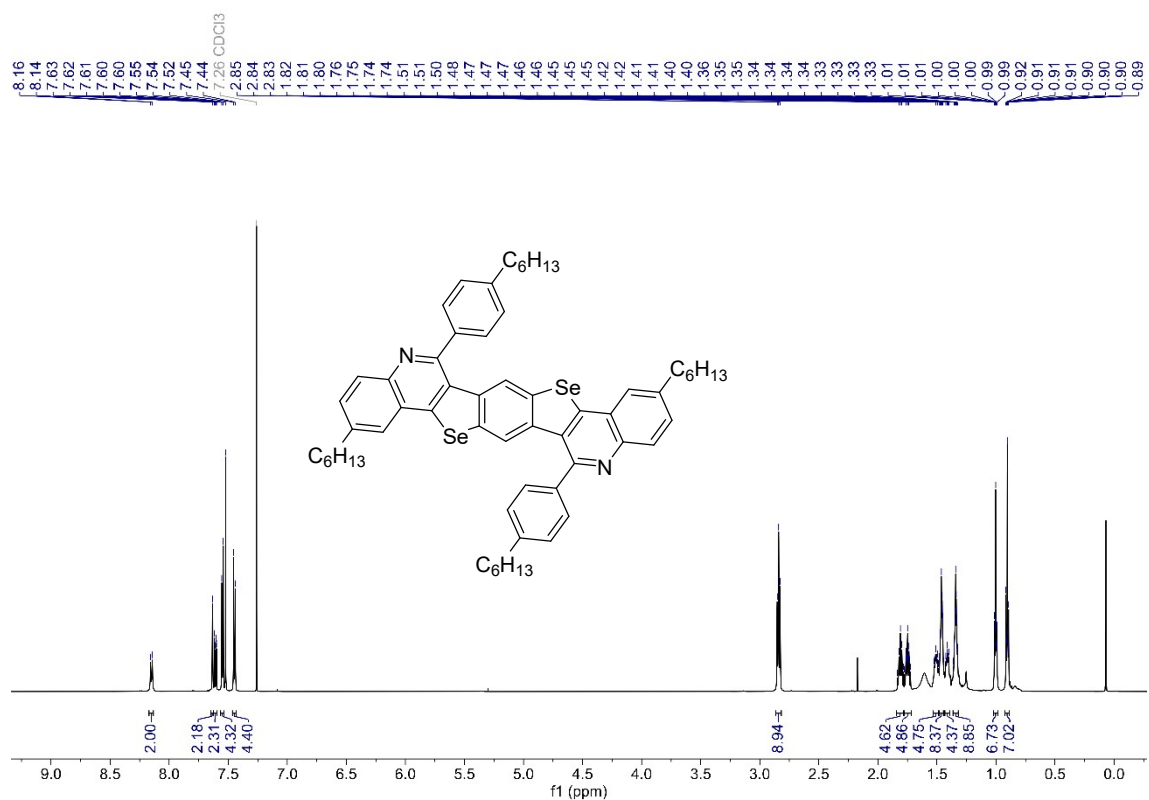

Figure S89. <sup>1</sup>H NMR spectrum (600 MHz, CDCl<sub>3</sub>) of 10cc.

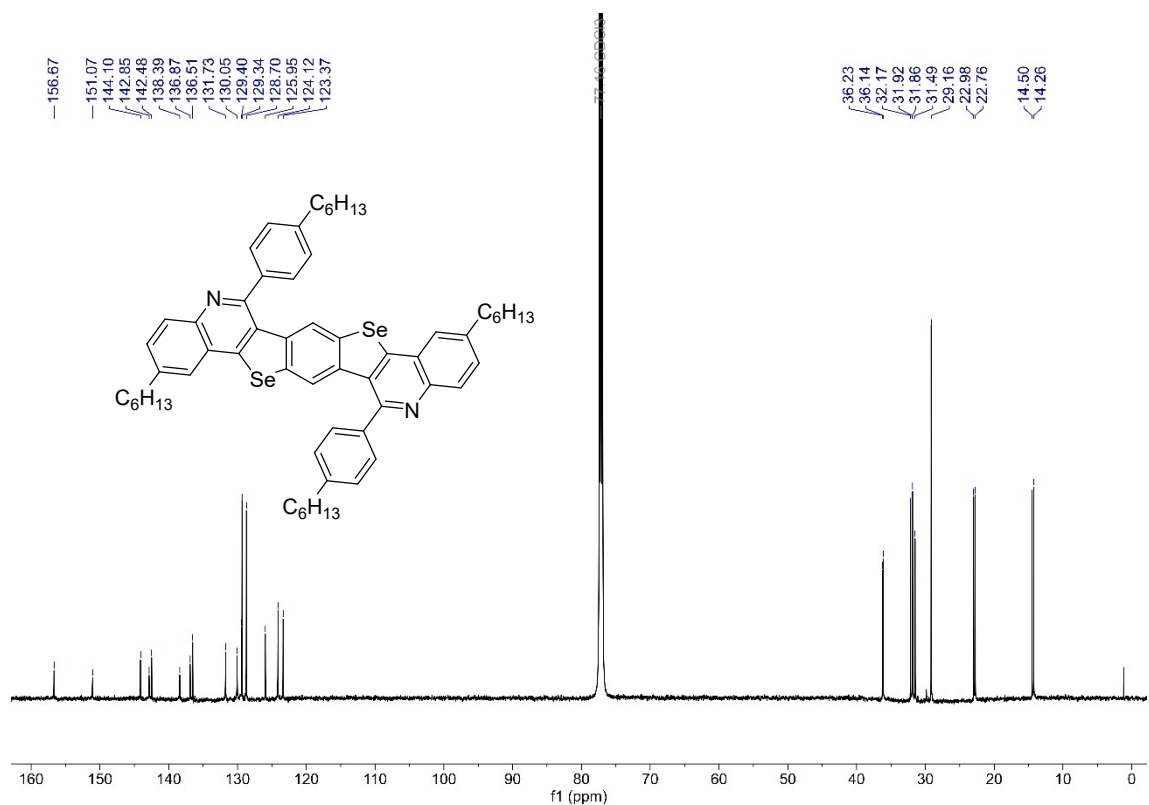

Figure S90. <sup>13</sup>C {<sup>1</sup>H} NMR spectrum (151 MHz, CDCl<sub>3</sub>) of 10cc.

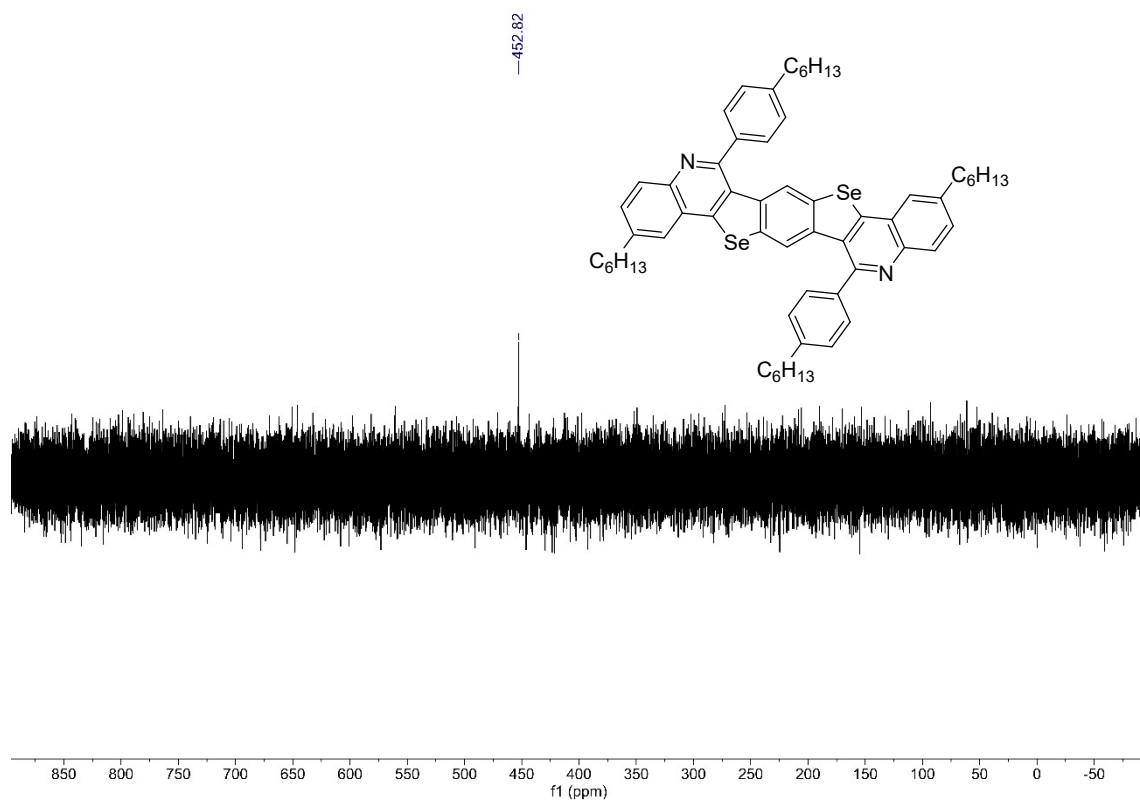

Figure S91.  $^{77}\text{Se}\{^1\text{H}\}$  NMR spectrum (76 MHz,  $\text{CDCl}_3$ ) of 10cc.

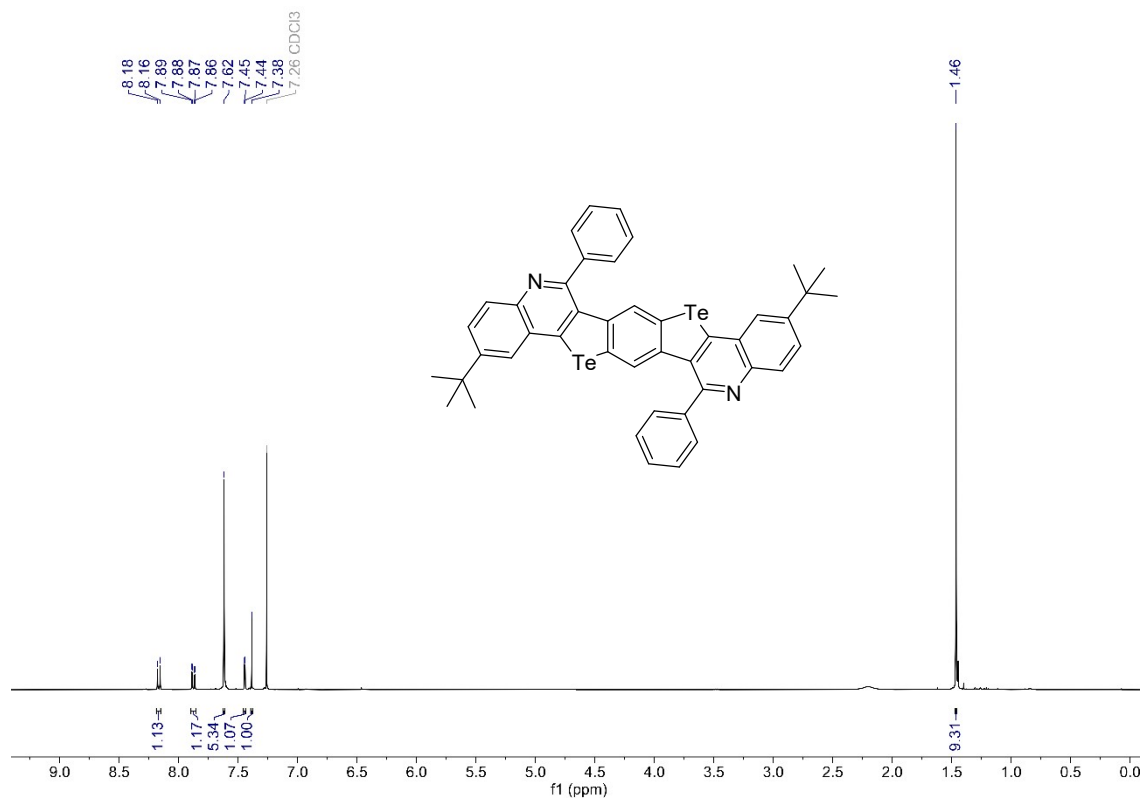

Figure S92.  $^1\text{H}$  NMR spectrum (400 MHz,  $\text{CDCl}_3$ ) of 11ba.

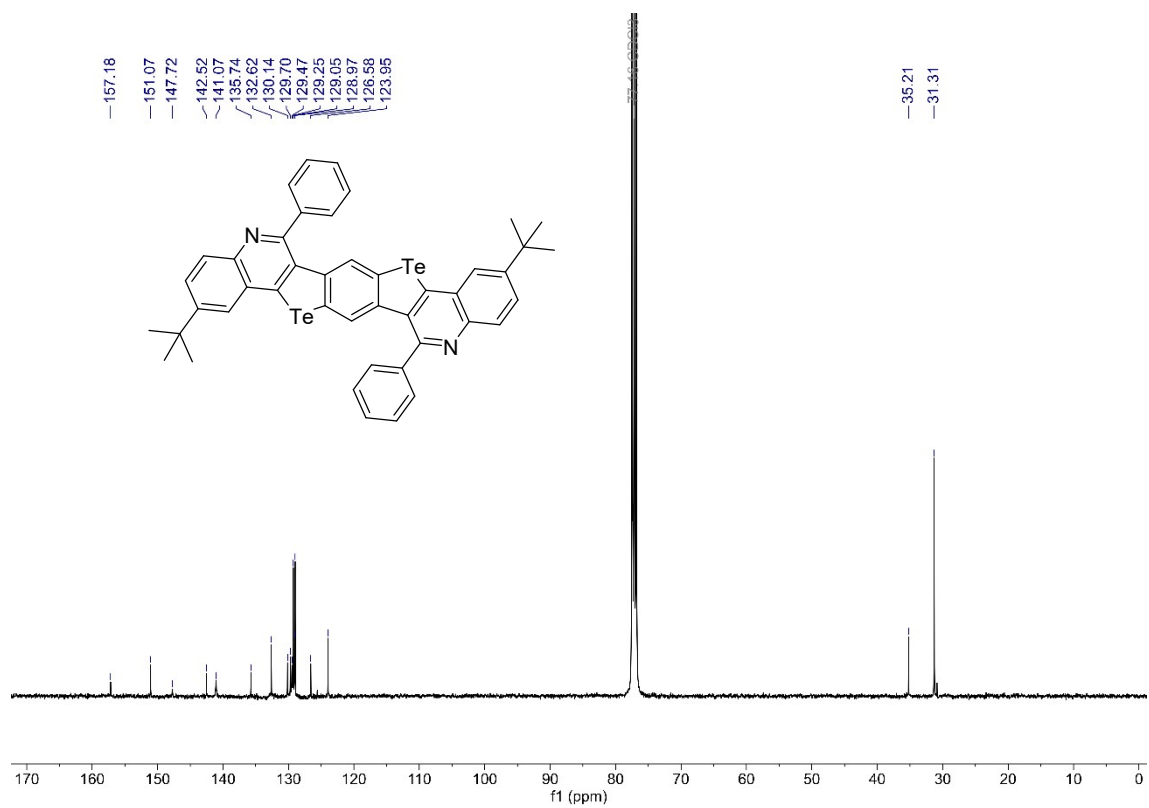

Figure S93. <sup>13</sup>C {<sup>1</sup>H} NMR spectrum (101 MHz, CDCl<sub>3</sub>) of 11ba.



### 3 UV-Vis and Fluorescence Spectra

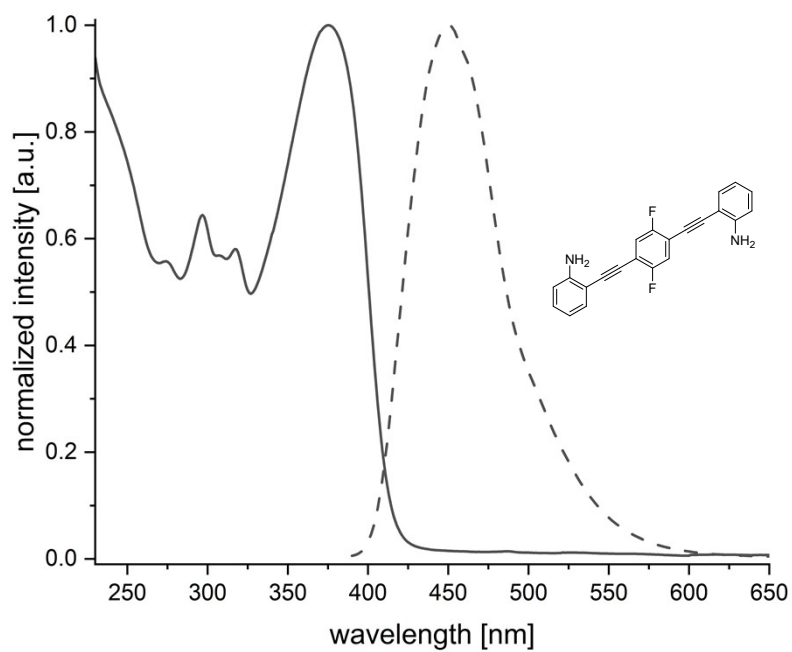

Figure S94. Absorption (solid line) and emission (dashed line) spectra of **5a** in DCM.

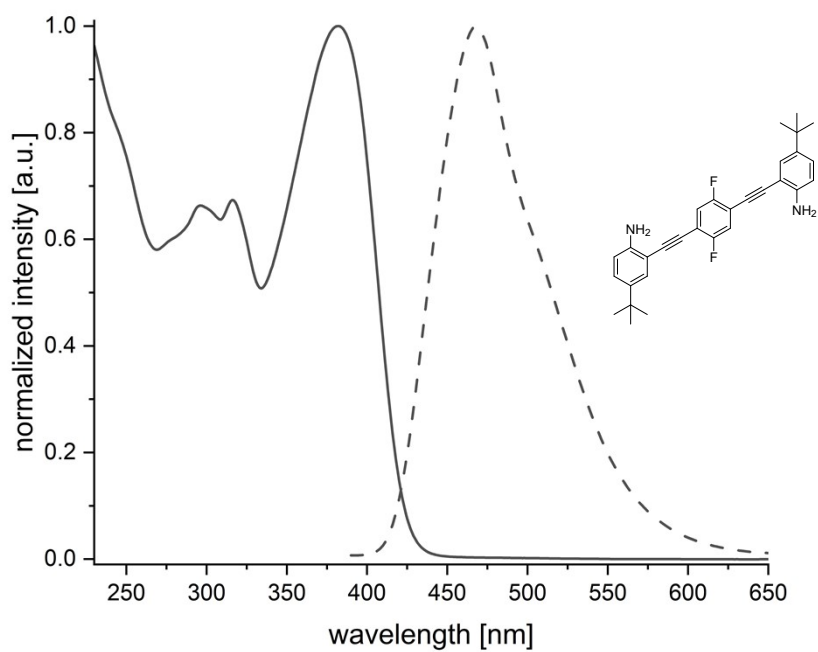

Figure S95. Absorption (solid line) and emission (dashed line) spectra of **5b** in DCM.

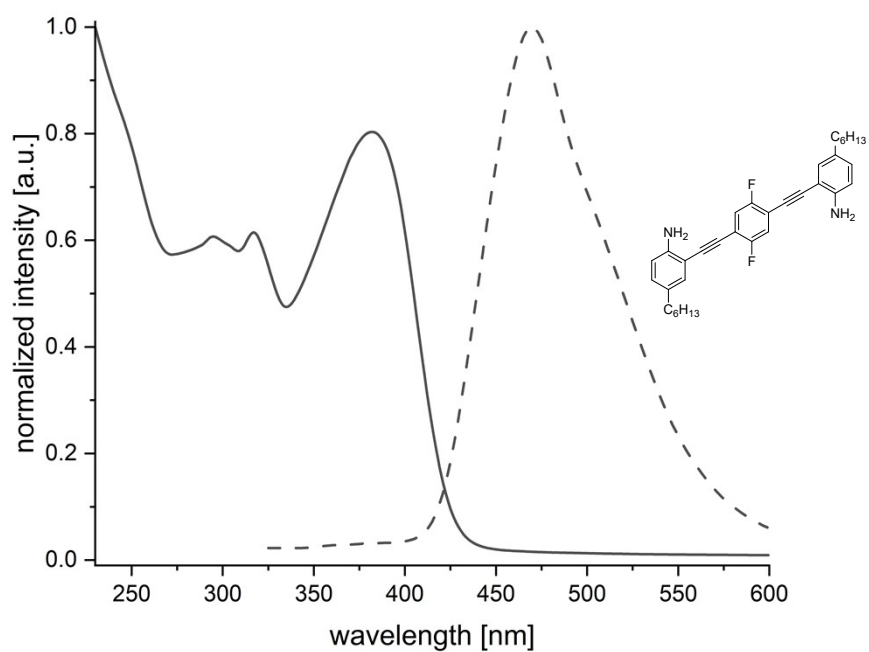

**Figure S96.** Absorption (solid line) and emission (dashed line) spectra of **5c** in DCM.

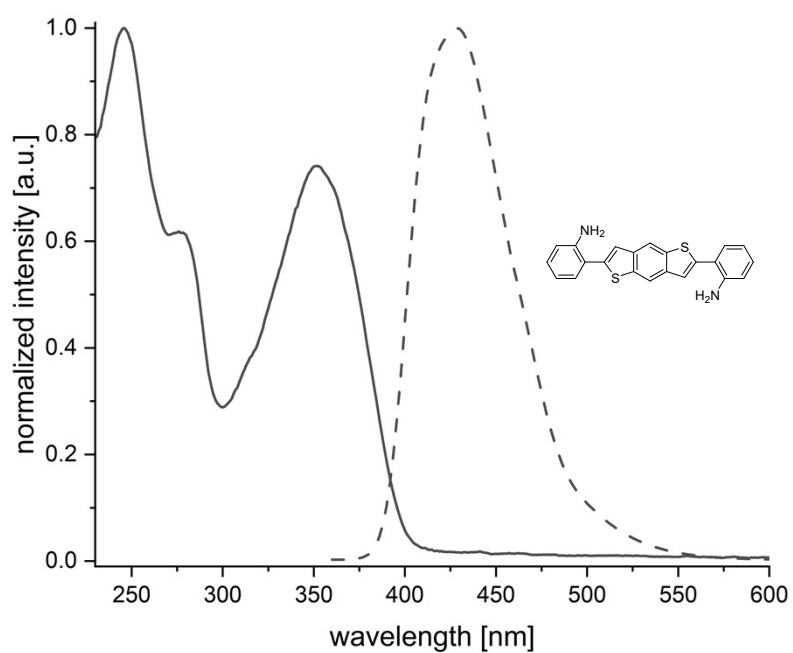

**Figure S97.** Absorption (solid line) and emission (dashed line) spectra of **6a** in DCM.

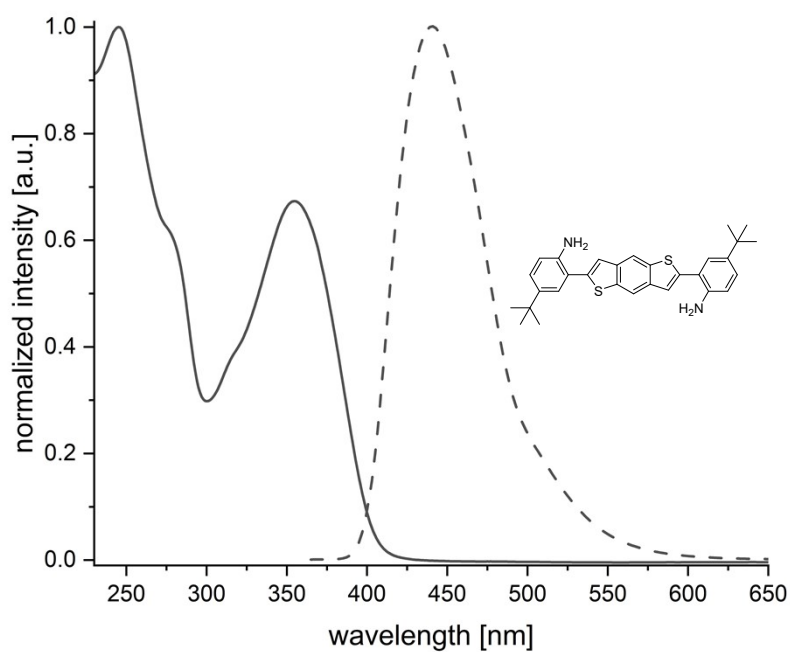

**Figure S98.** Absorption (solid line) and emission (dashed line) spectra of **6b** in DCM.

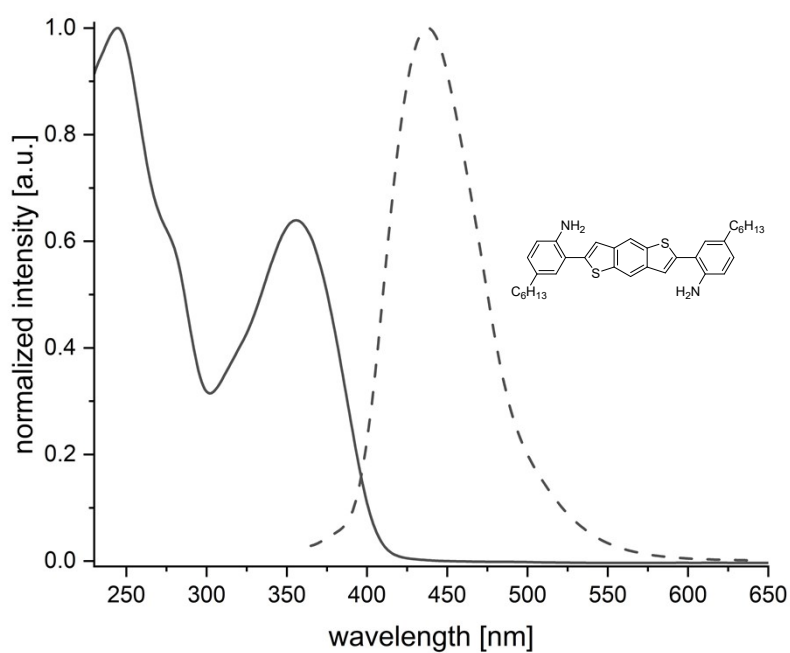

**Figure S99.** Absorption (solid line) and emission (dashed line) spectra of **6c** in DCM.

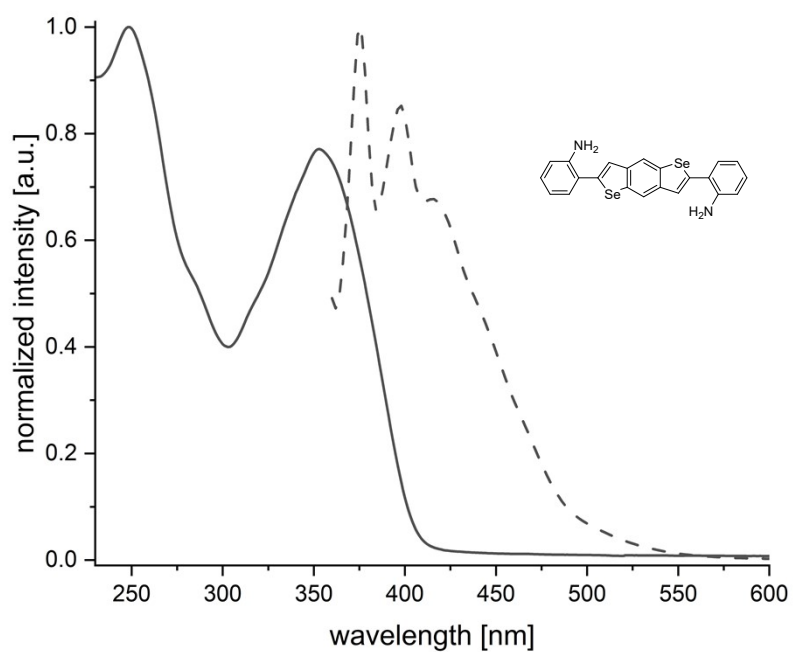

**Figure S100.** Absorption (solid line) and emission (dashed line) spectra of **7a** in DCM.

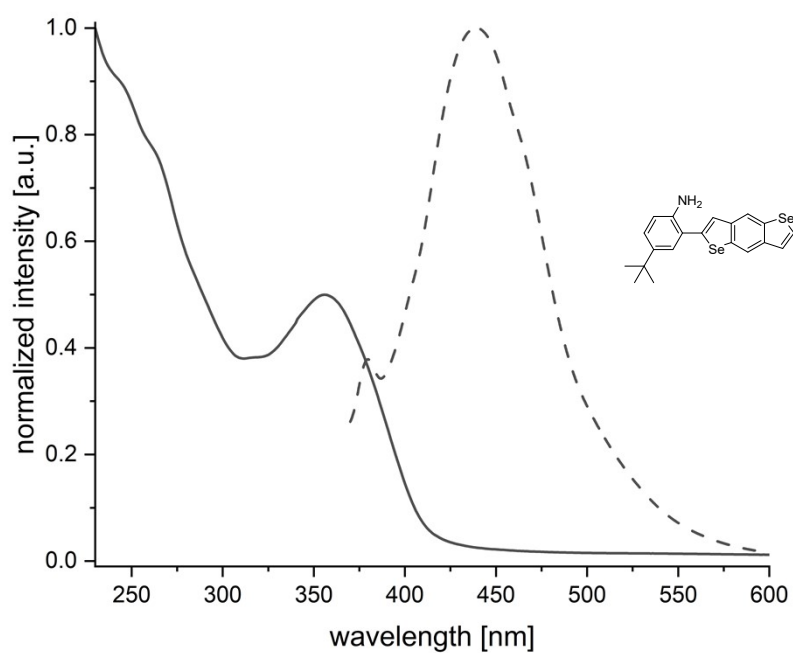

**Figure S101.** Absorption (solid line) and emission (dashed line) spectra of **7b** in DCM.

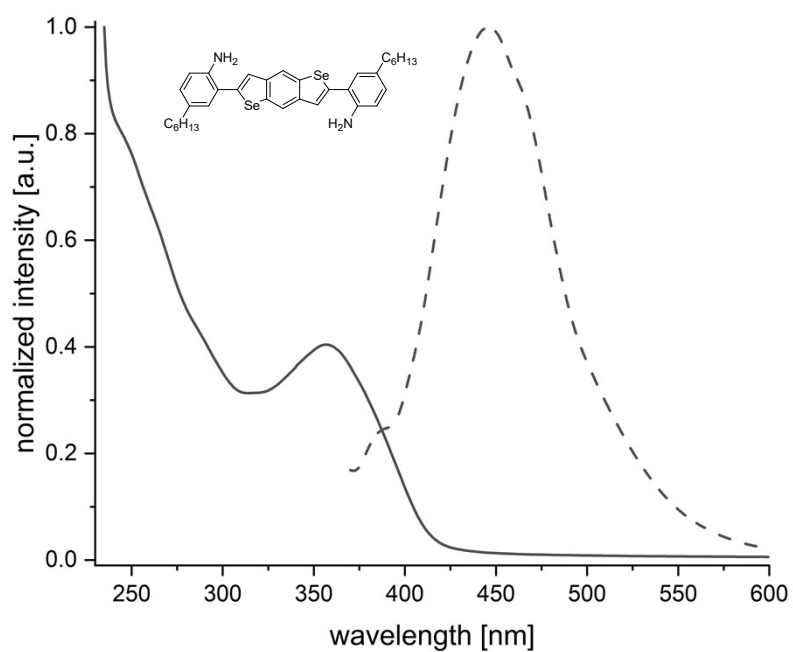

**Figure S102.** Absorption (solid line) and emission (dashed line) spectra of **7c** in DCM.

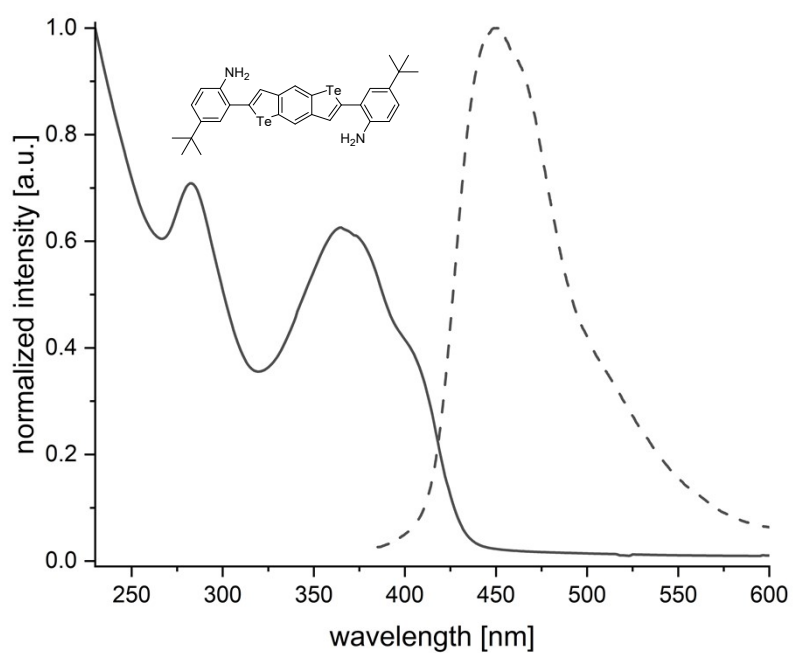

**Figure S103.** Absorption (solid line) and emission (dashed line) spectra of **8** in DCM.

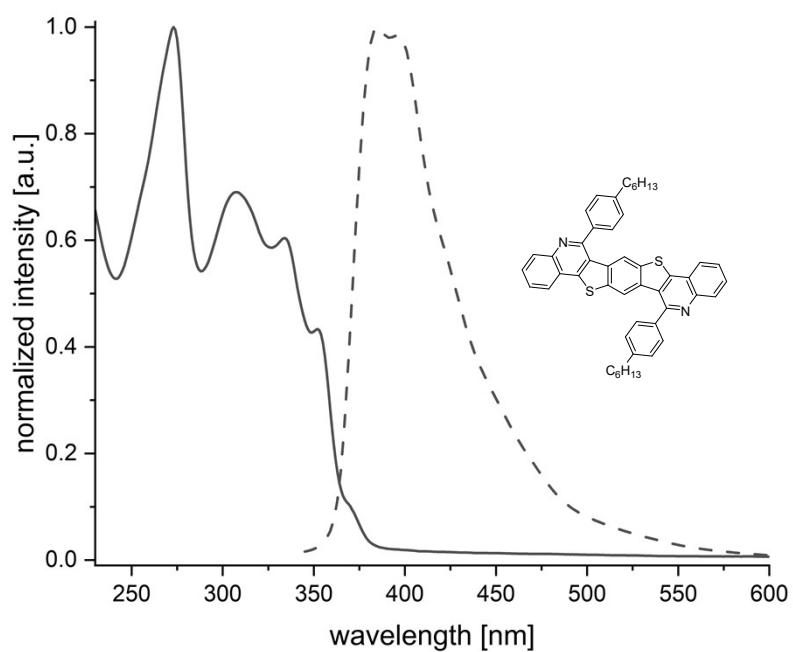

**Figure S104.** Absorption (solid line) and emission (dashed line) spectra of **9aa** in DCM.

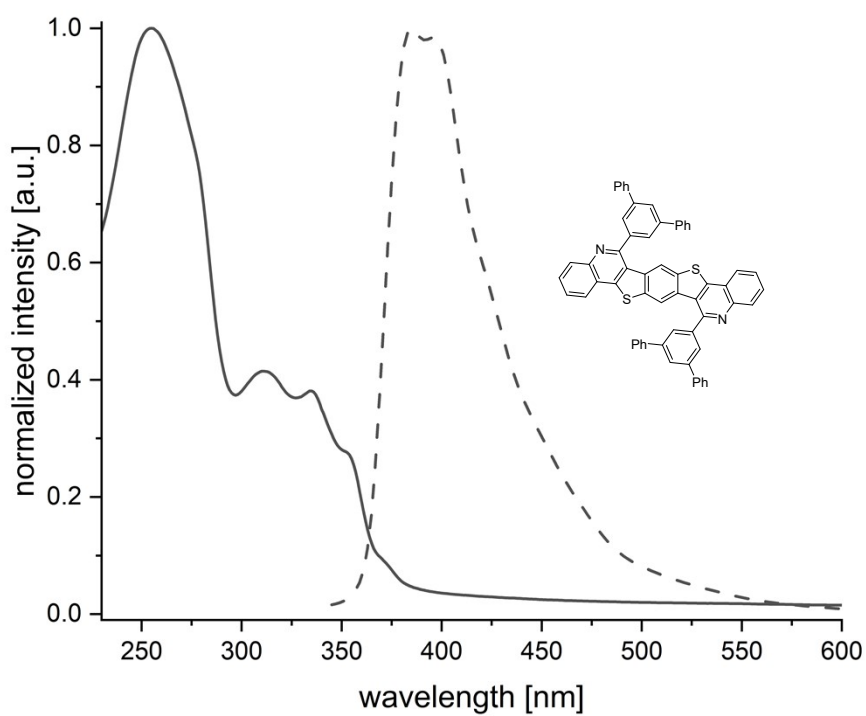

**Figure S105.** Absorption (solid line) and emission (dashed line) spectra of **9ab** in DCM.

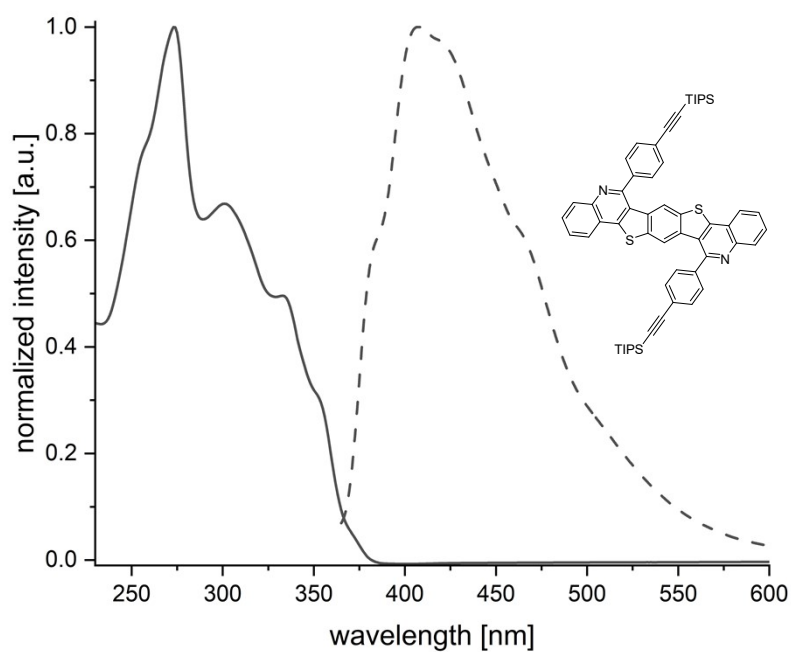

**Figure S106.** Absorption (solid line) and emission (dashed line) spectra of **9ac** in DCM.

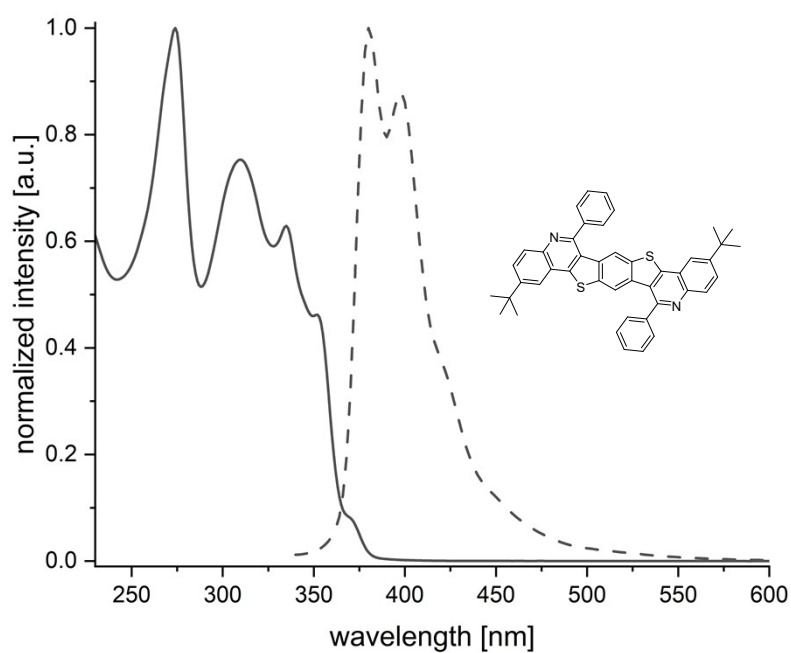

**Figure S107.** Absorption (solid line) and emission (dashed line) spectra of **9ba** in DCM.

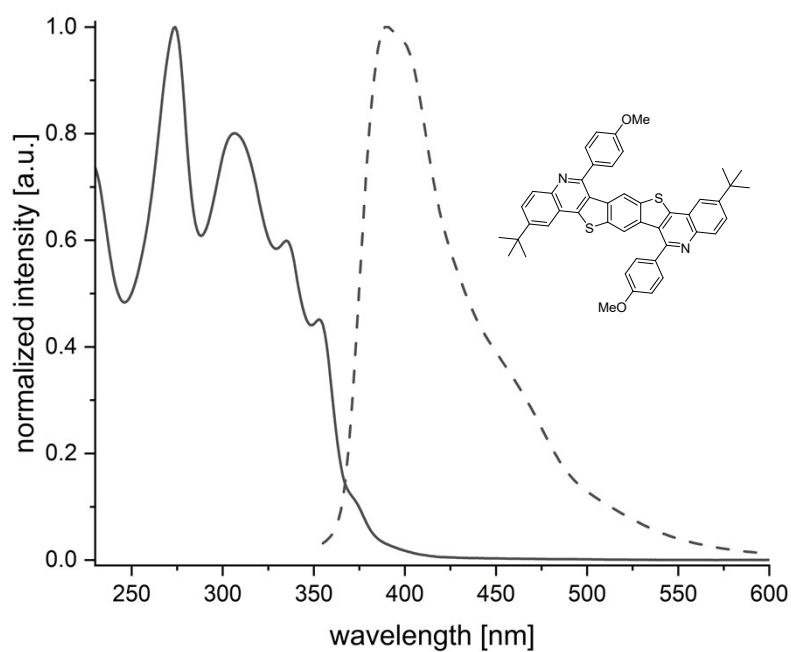

**Figure S108.** Absorption (solid line) and emission (dashed line) spectra of **9bb** in DCM.

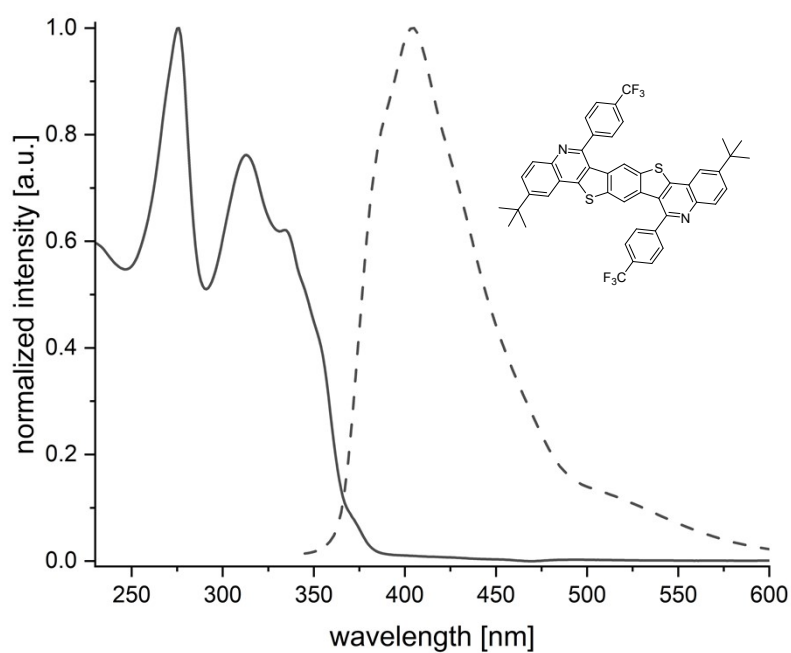

**Figure S109.** Absorption (solid line) and emission (dashed line) spectra of **9bc** in DCM.



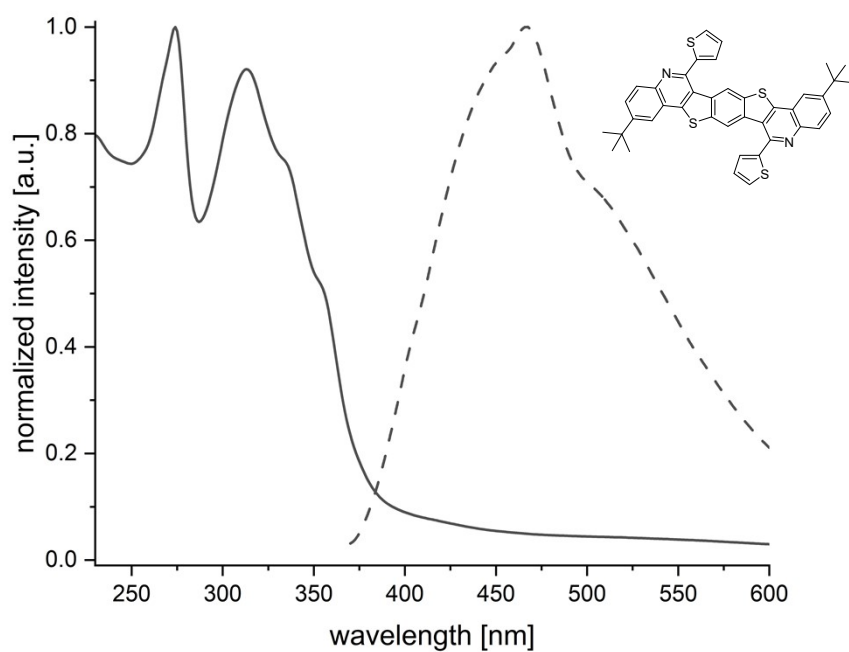

**Figure S110.** Absorption (solid line) and emission (dashed line) spectra of **9bd** in DCM.

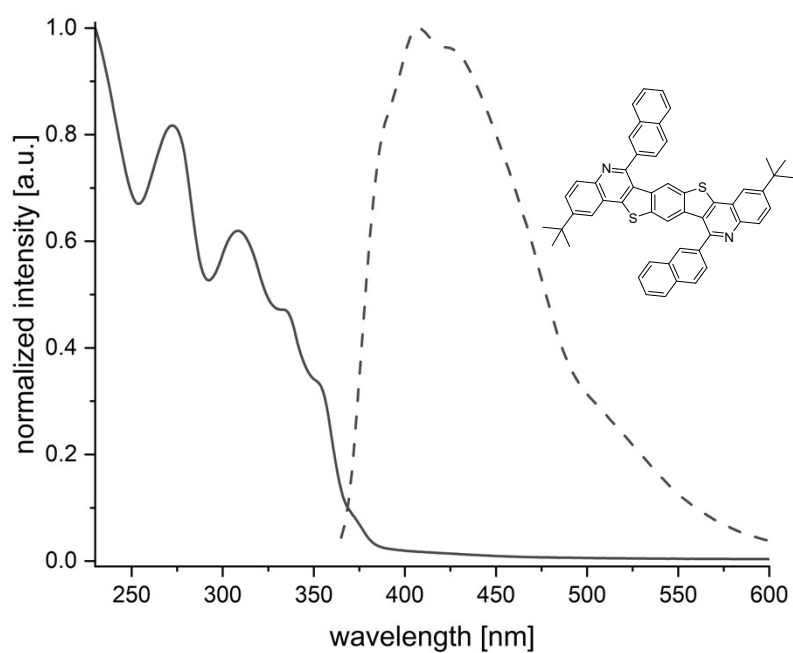

**Figure S111.** Absorption (solid line) and emission (dashed line) spectra of **9be** in DCM.

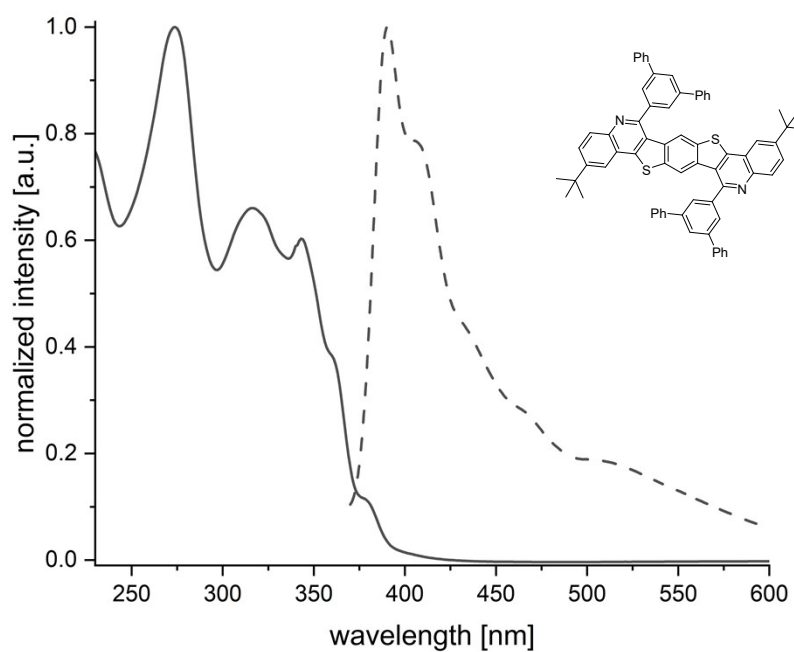

**Figure S112.** Absorption (solid line) and emission (dashed line) spectra of **9bf** in DCM.

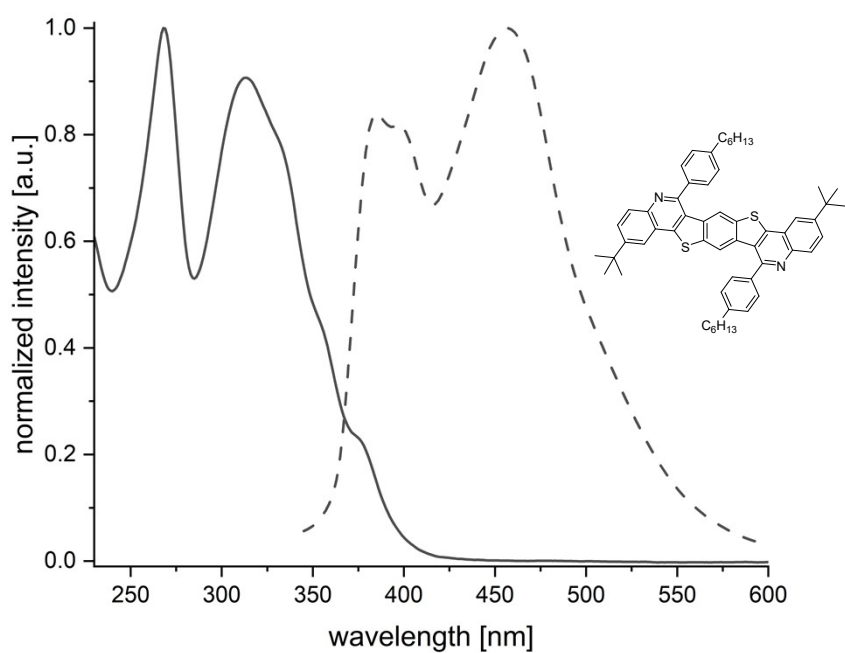

**Figure S113.** Absorption (solid line) and emission (dashed line) spectra of **9bg** in DCM.

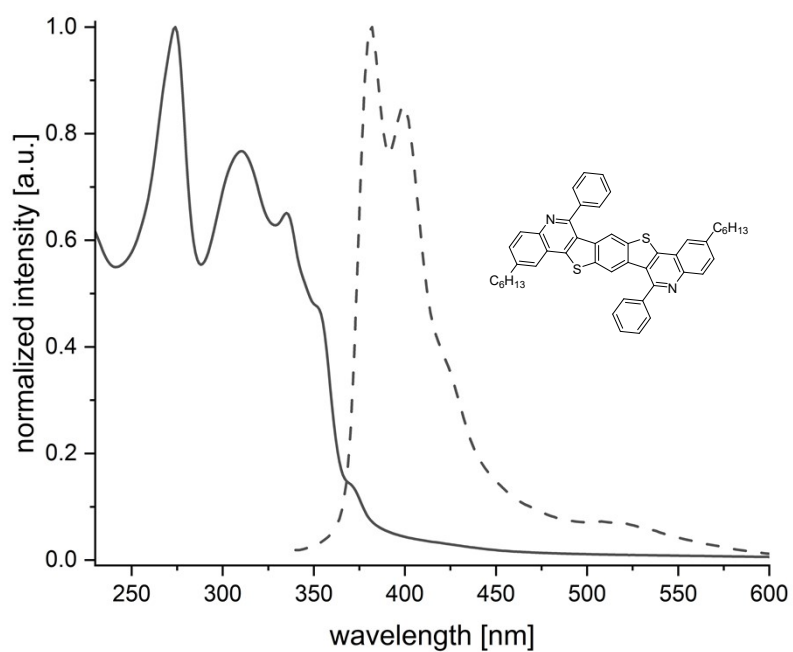

**Figure S114.** Absorption (solid line) and emission (dashed line) spectra of **9ca** in DCM.

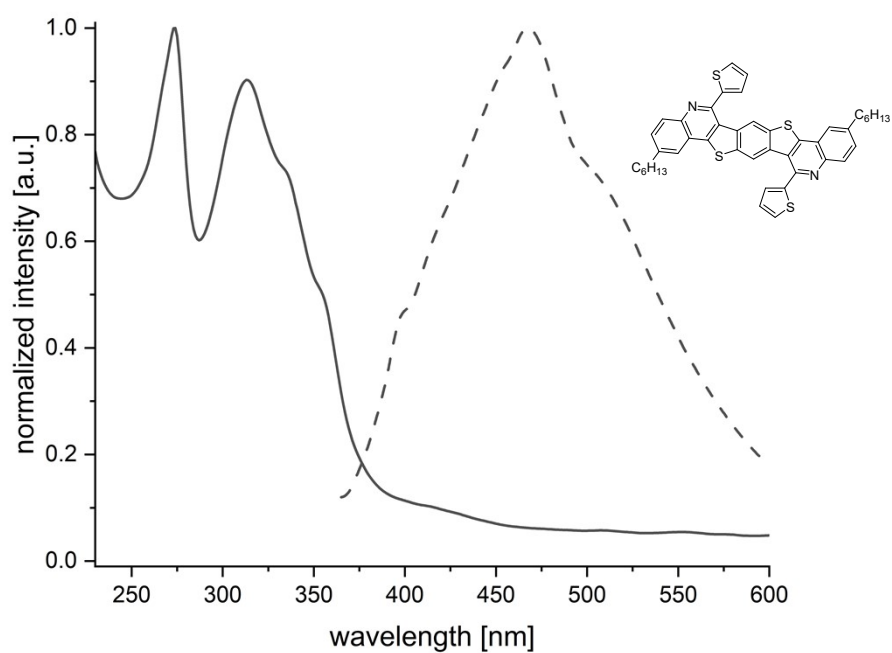

**Figure S115.** Absorption (solid line) and emission (dashed line) spectra of **9cb** in DCM.

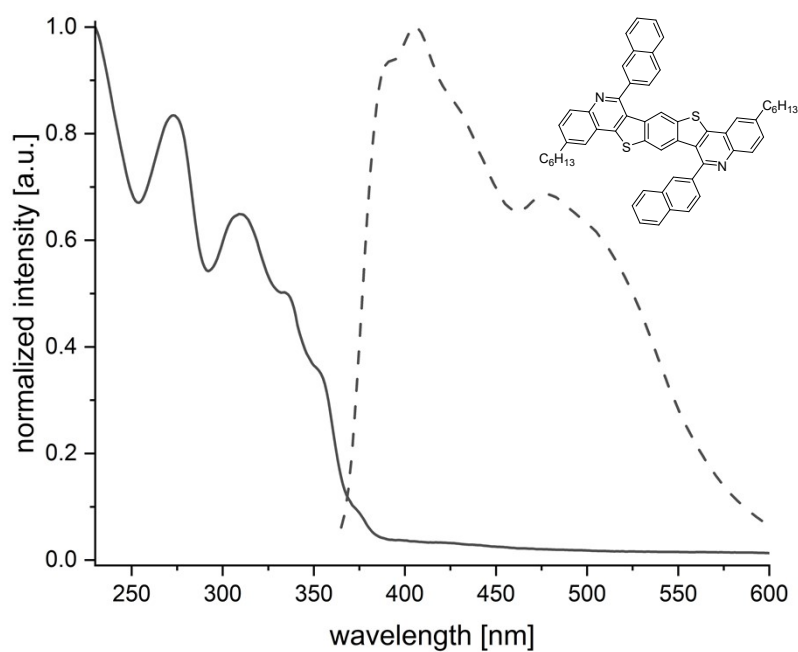

**Figure S116.** Absorption (solid line) and emission (dashed line) spectra of **9cc** in DCM.

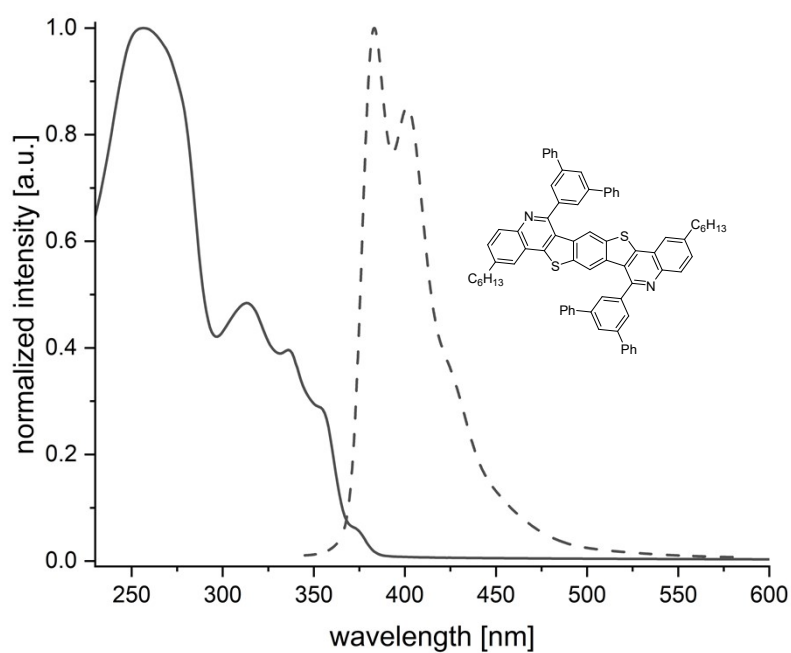

**Figure S117.** Absorption (solid line) and emission (dashed line) spectra of **9cd** in DCM.

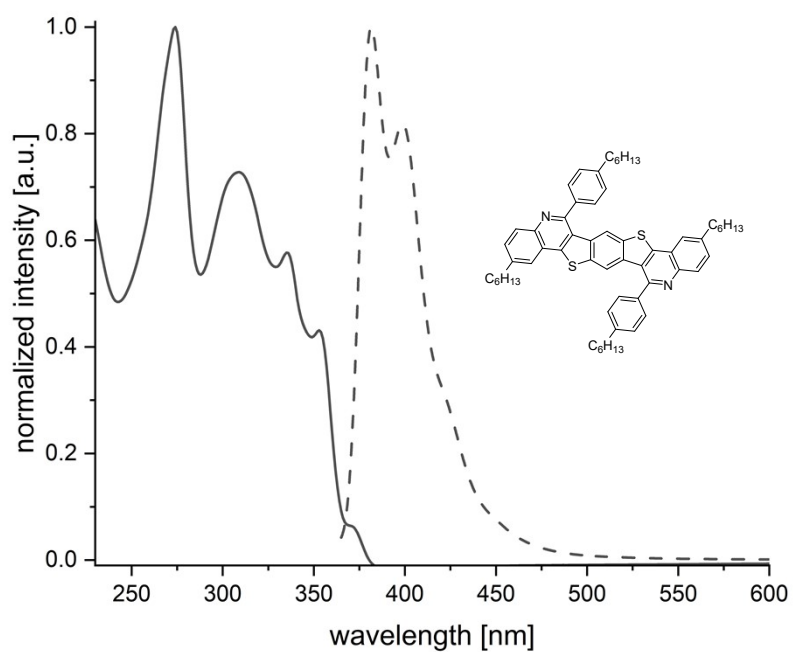

**Figure S118.** Absorption (solid line) and emission (dashed line) spectra of **9ce** in DCM.

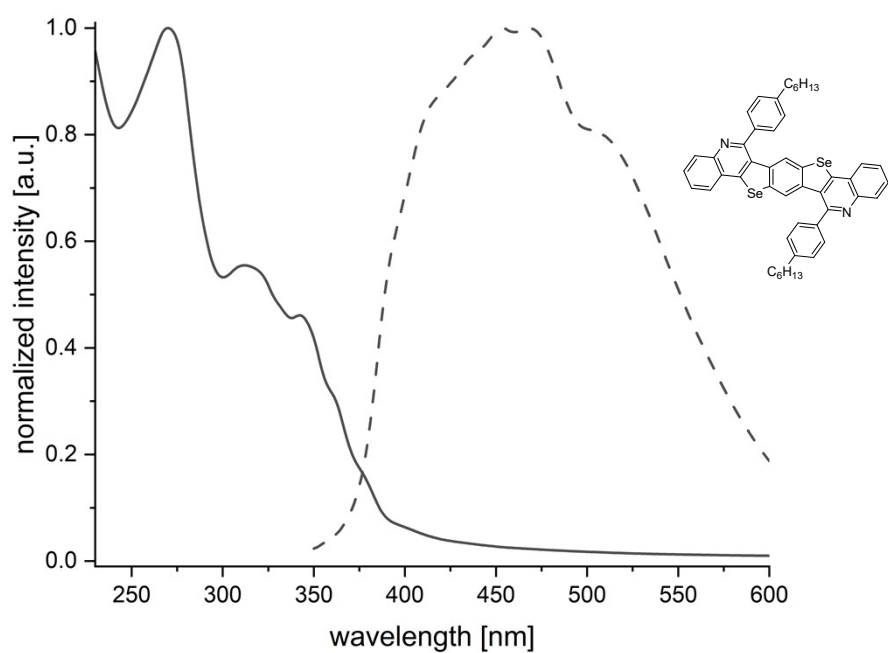

**Figure S119.** Absorption (solid line) and emission (dashed line) spectra of **10aa** in DCM.

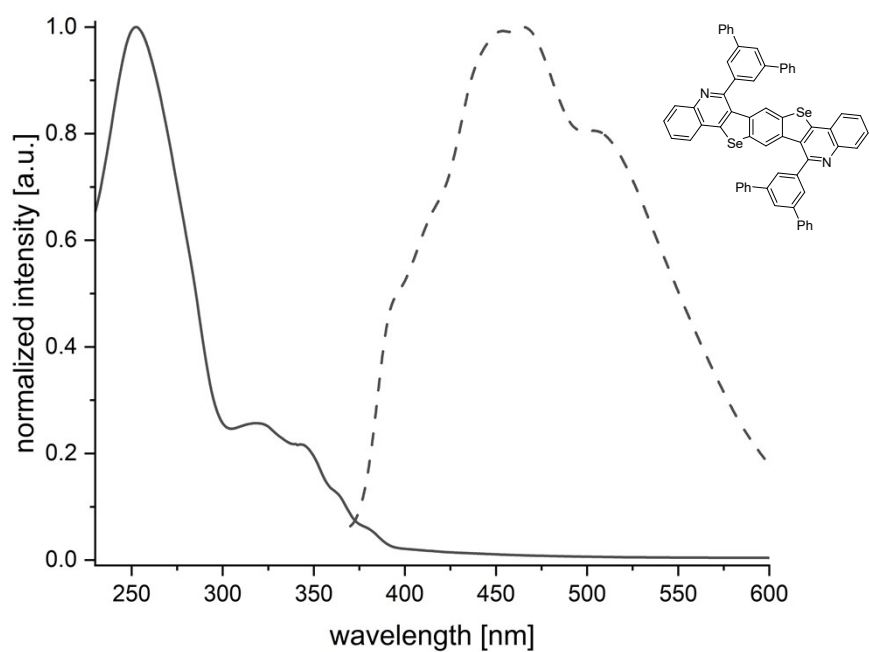

**Figure S120.** Absorption (solid line) and emission (dashed line) spectra of **10ab** in DCM.

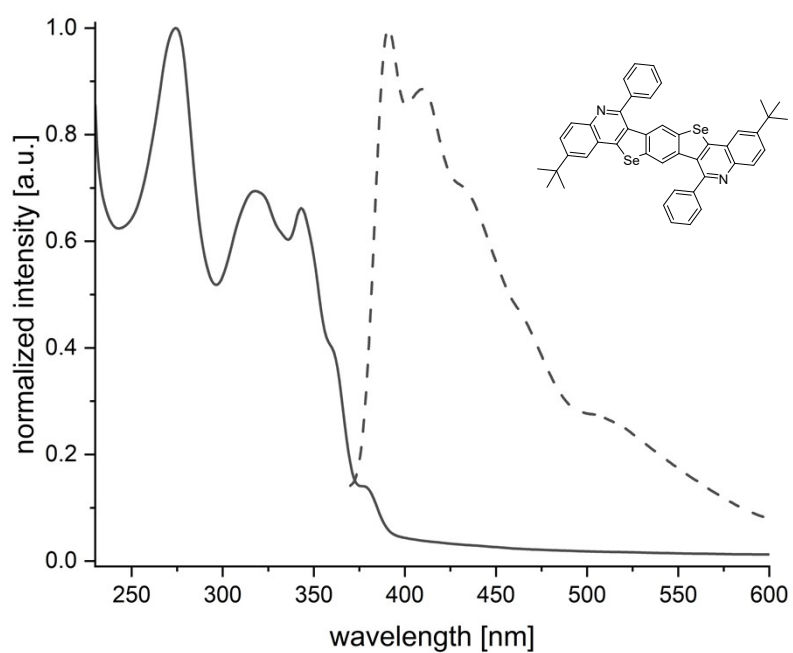

**Figure S121.** Absorption (solid line) and emission (dashed line) spectra of **10ba** in DCM.

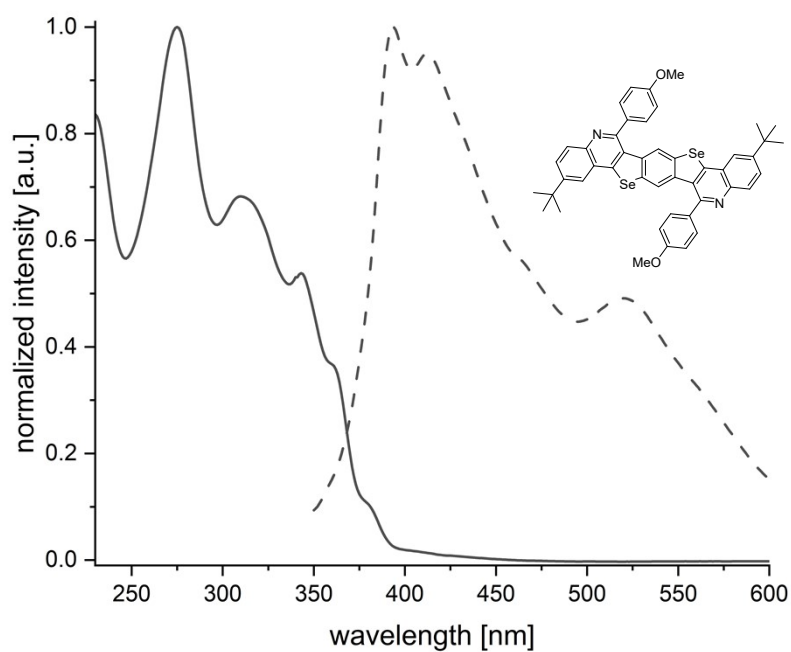

**Figure S122.** Absorption (solid line) and emission (dashed line) spectra of **10bb** in DCM.

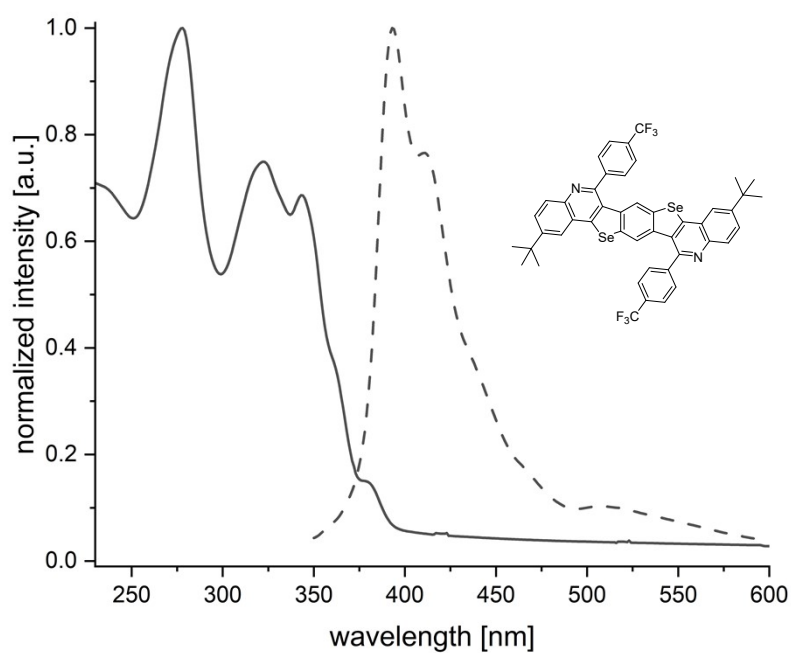

**Figure S123.** Absorption (solid line) and emission (dashed line) spectra of **10bc** in DCM.

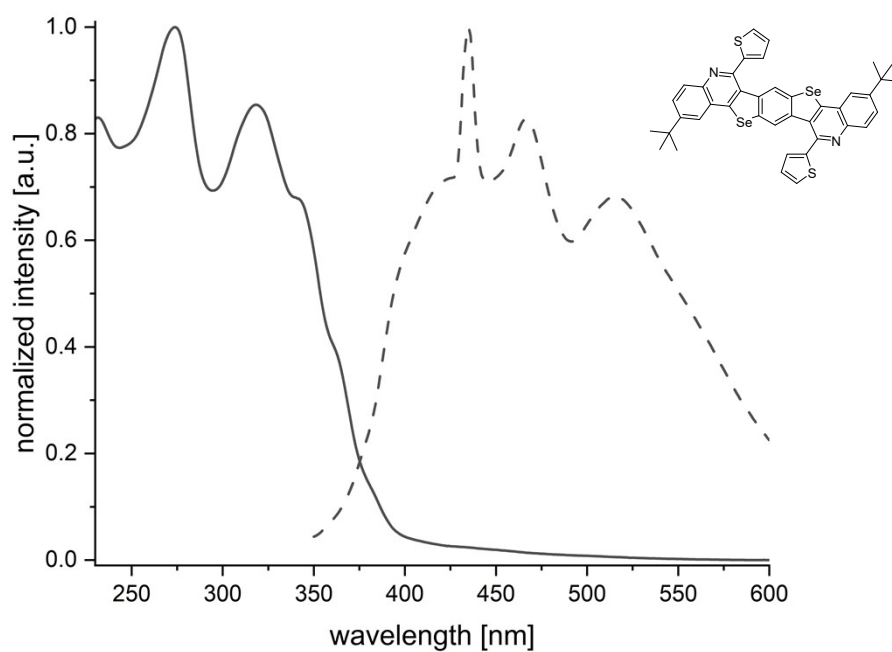

**Figure S124.** Absorption (solid line) and emission (dashed line) spectra of **10bd** in DCM.

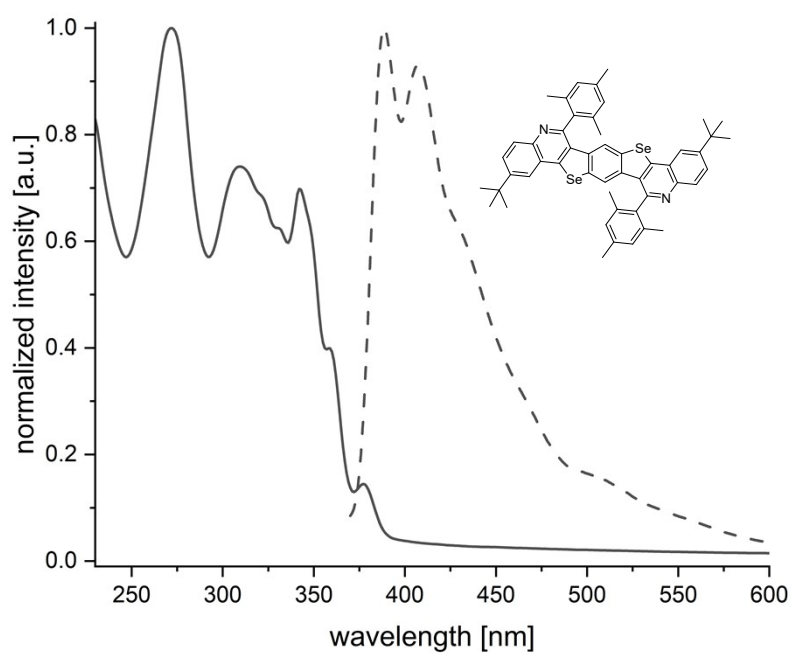

**Figure S125.** Absorption (solid line) and emission (dashed line) spectra of **10be** in DCM.



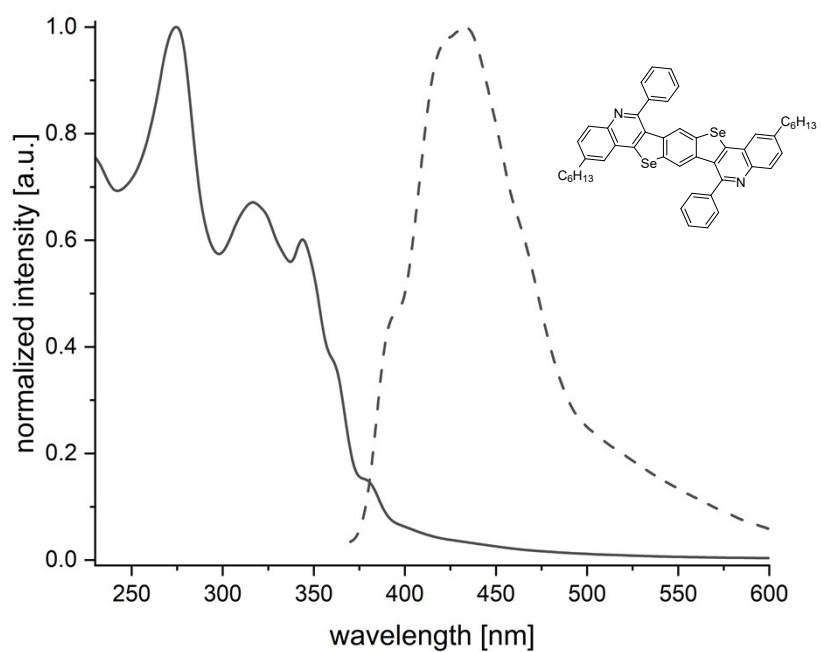

**Figure S126.** Absorption (solid line) and emission (dashed line) spectra of **10ca** in DCM.

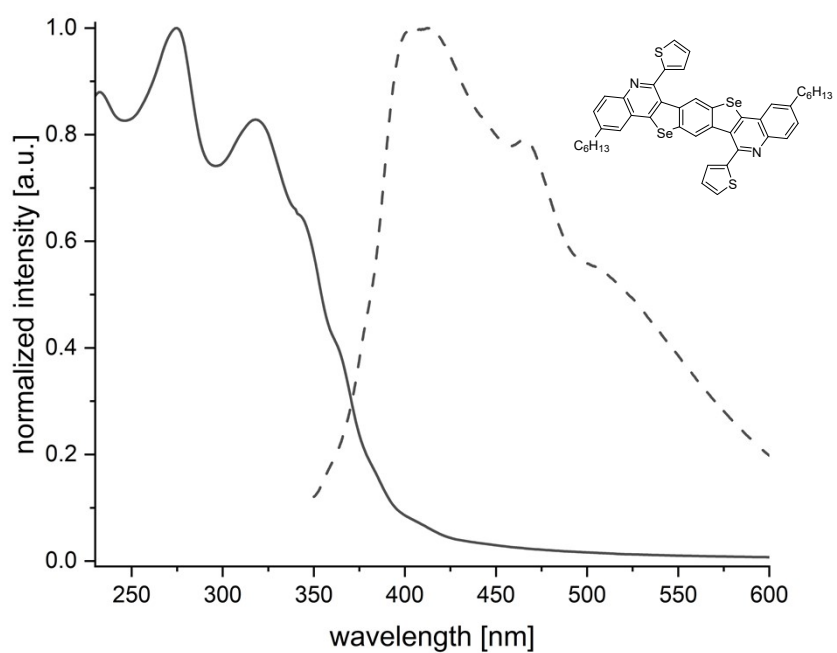

**Figure S127.** Absorption (solid line) and emission (dashed line) spectra of **10cb** in DCM.

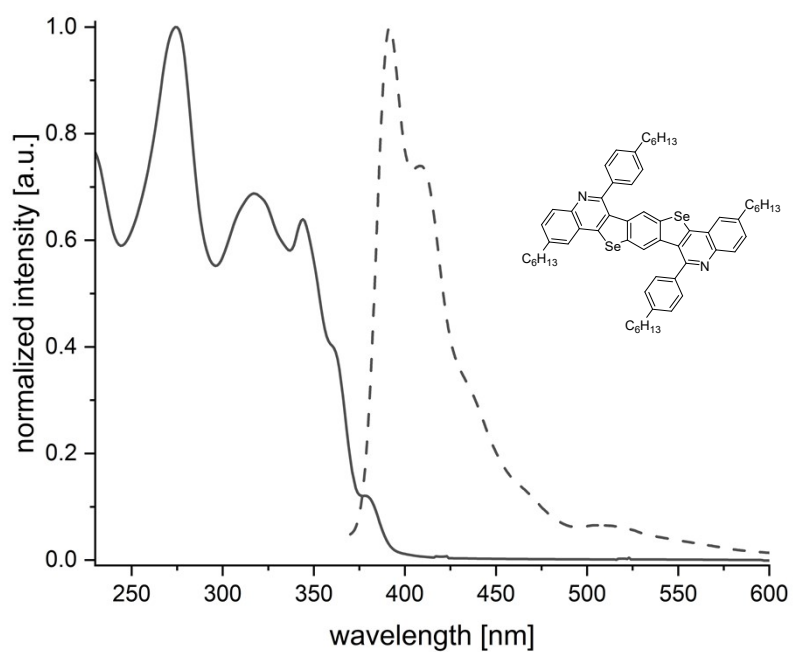

**Figure S128.** Absorption (solid line) and emission (dashed line) spectra of **10cc** in DCM.

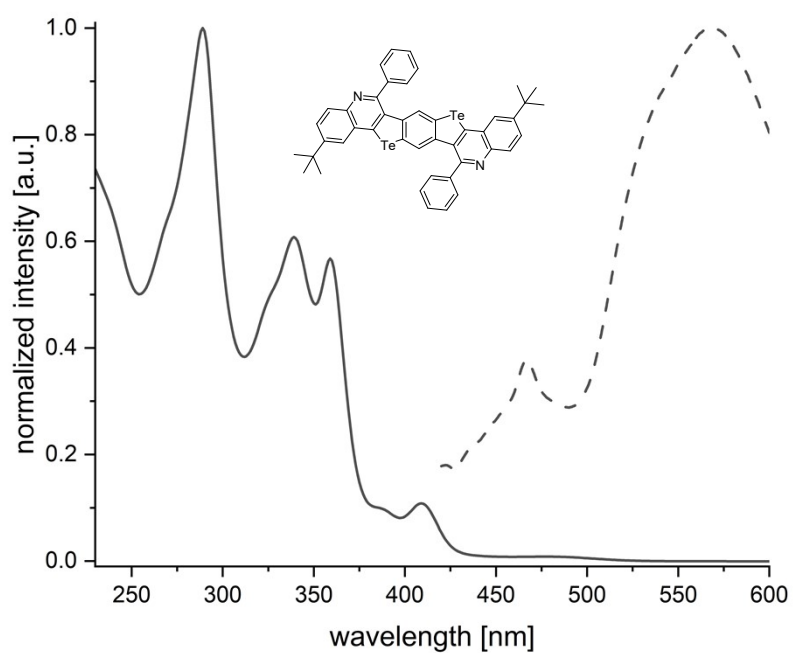

**Figure S129.** Absorption (solid line) and emission (dashed line) spectra of **11ba** in DCM.

## 4 Thermogravimetric Analysis / Differential Scanning Calorimetry (TGA/DSC)

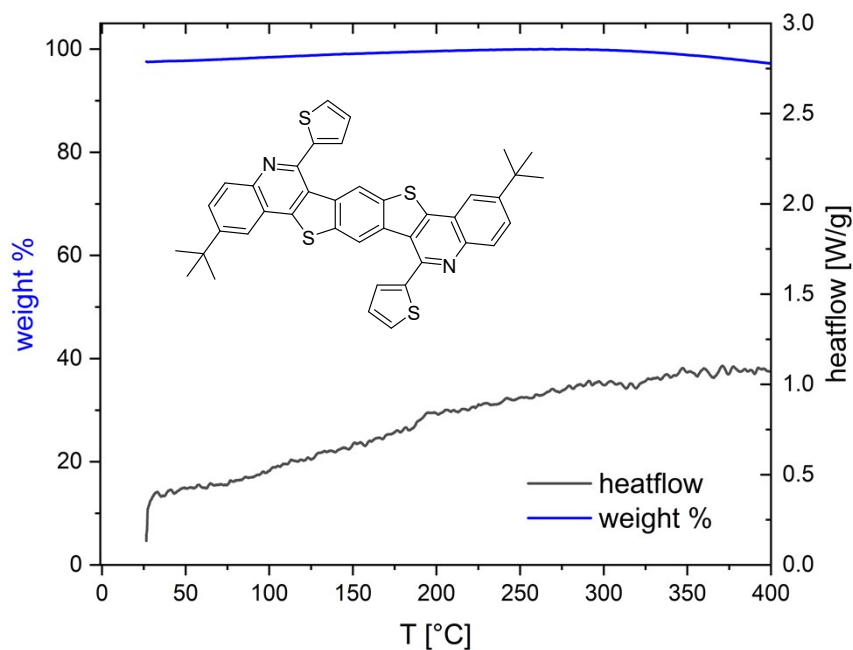

Figure S130. TGA/DSC plot of **9bd** under nitrogen atmosphere.

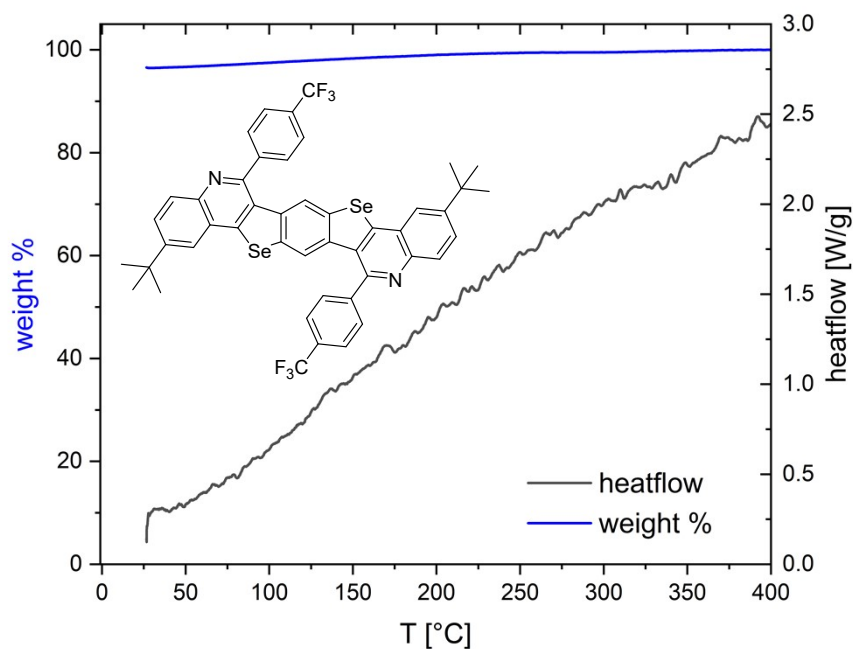

Figure S131. TGA/DSC plot of **10bc** under nitrogen atmosphere.

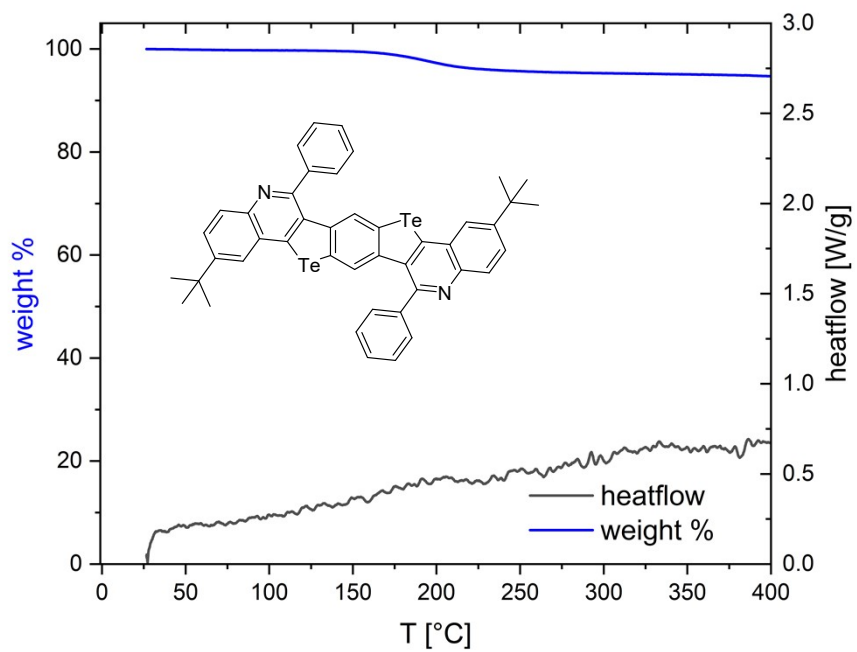

**Figure S132.** TGA/DSC plot of **11ba** under nitrogen atmosphere.

## 5 Crystallographic Data

Table S1. Crystal structure, crystal data and structure refinement of **5a** (CCDC 2380037).

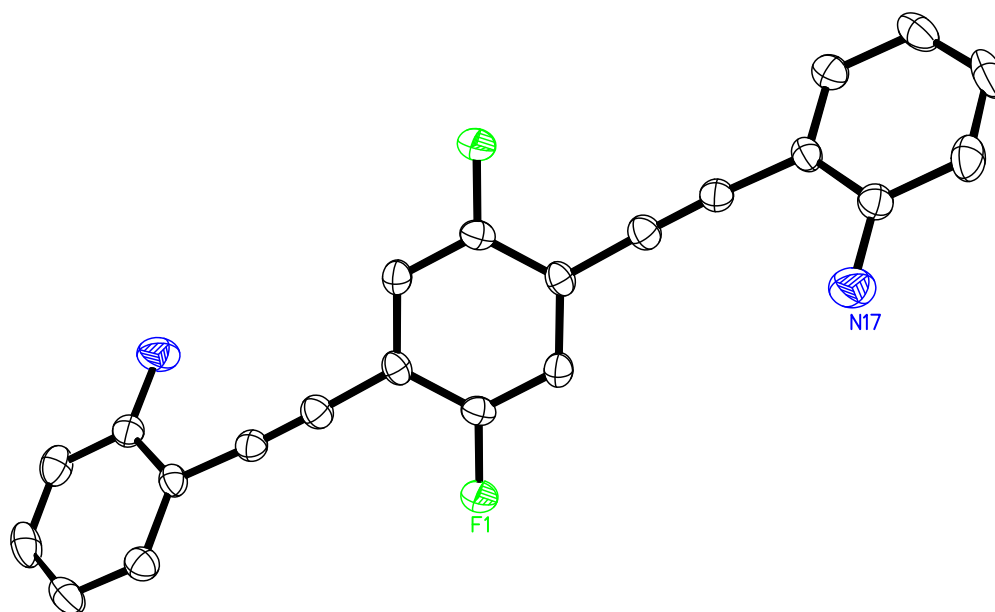

|                                   |                                                               |                             |
|-----------------------------------|---------------------------------------------------------------|-----------------------------|
| Empirical formula                 | C <sub>22</sub> H <sub>14</sub> F <sub>2</sub> N <sub>2</sub> |                             |
| Formula weight                    | 344.35                                                        |                             |
| Temperature                       | 200(2) K                                                      |                             |
| Wavelength                        | 0.71073 Å                                                     |                             |
| Crystal system                    | triclinic                                                     |                             |
| Space group                       | P $\bar{1}$                                                   |                             |
| Z                                 | 2                                                             |                             |
| Unit cell dimensions              | a = 5.9473(5) Å                                               | $\alpha$ = 95.1290(19) deg. |
|                                   | b = 7.4852(7) Å                                               | $\beta$ = 98.8424(18) deg.  |
|                                   | c = 18.7512(16) Å                                             | $\gamma$ = 90.5733(17) deg. |
| Volume                            | 821.28(12) Å <sup>3</sup>                                     |                             |
| Density (calculated)              | 1.39 g/cm <sup>3</sup>                                        |                             |
| Absorption coefficient            | 0.10 mm <sup>-1</sup>                                         |                             |
| Crystal shape                     | plank                                                         |                             |
| Crystal size                      | 0.210 x 0.150 x 0.046 mm <sup>3</sup>                         |                             |
| Crystal colour                    | yellow                                                        |                             |
| Theta range for data collection   | 2.2 to 28.4 deg.                                              |                             |
| Index ranges                      | -7 ≤ h ≤ 7, -9 ≤ k ≤ 9, -24 ≤ l ≤ 23                          |                             |
| Reflections collected             | 11889                                                         |                             |
| Independent reflections           | 3682 (R(int) = 0.0341)                                        |                             |
| Observed reflections              | 2732 (I > 2σ(I))                                              |                             |
| Absorption correction             | Semi-empirical from equivalents                               |                             |
| Max. and min. transmission        | 0.96 and 0.92                                                 |                             |
| Refinement method                 | Full-matrix least-squares on F <sup>2</sup>                   |                             |
| Data/restraints/parameters        | 3682 / 6 / 248                                                |                             |
| Goodness-of-fit on F <sup>2</sup> | 1.05                                                          |                             |
| Final R indices (I > 2σ(I))       | R1 = 0.046, wR2 = 0.101                                       |                             |
| Largest diff. peak and hole       | 0.24 and -0.20 eÅ <sup>-3</sup>                               |                             |

**Table S2.** Crystal structure, crystal data and structure refinement of **5b** (CCDC 2380038).

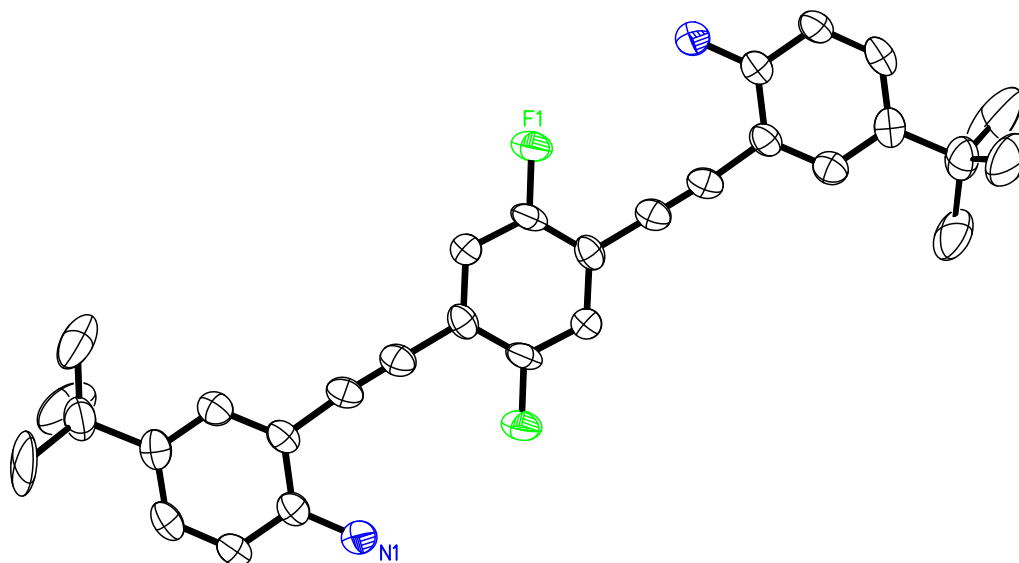

|                                   |                                                               |                     |
|-----------------------------------|---------------------------------------------------------------|---------------------|
| Empirical formula                 | C <sub>30</sub> H <sub>30</sub> F <sub>2</sub> N <sub>2</sub> |                     |
| Formula weight                    | 456.56                                                        |                     |
| Temperature                       | 200(2) K                                                      |                     |
| Wavelength                        | 0.71073 Å                                                     |                     |
| Crystal system                    | monoclinic                                                    |                     |
| Space group                       | P2 <sub>1</sub> /c                                            |                     |
| Z                                 | 4                                                             |                     |
| Unit cell dimensions              | a = 22.061(4) Å                                               | α = 90 deg.         |
|                                   | b = 6.1949(10) Å                                              | β = 118.425(3) deg. |
|                                   | c = 21.030(3) Å                                               | γ = 90 deg.         |
| Volume                            | 2527.6(7) Å <sup>3</sup>                                      |                     |
| Density (calculated)              | 1.20 g/cm <sup>3</sup>                                        |                     |
| Absorption coefficient            | 0.08 mm <sup>-1</sup>                                         |                     |
| Crystal shape                     | plate                                                         |                     |
| Crystal size                      | 0.140 x 0.096 x 0.018 mm <sup>3</sup>                         |                     |
| Crystal colour                    | yellow                                                        |                     |
| Theta range for data collection   | 1.0 to 20.2 deg.                                              |                     |
| Index ranges                      | -21 ≤ h ≤ 21, -6 ≤ k ≤ 6, -20 ≤ l ≤ 20                        |                     |
| Reflections collected             | 16704                                                         |                     |
| Independent reflections           | 2408 (R(int) = 0.0936)                                        |                     |
| Observed reflections              | 1681 (I > 2σ(I))                                              |                     |
| Absorption correction             | Semi-empirical from equivalents                               |                     |
| Max. and min. transmission        | 0.96 and 0.88                                                 |                     |
| Refinement method                 | Full-matrix least-squares on F <sup>2</sup>                   |                     |
| Data/restraints/parameters        | 2408 / 379 / 325                                              |                     |
| Goodness-of-fit on F <sup>2</sup> | 1.06                                                          |                     |
| Final R indices (I > 2σ(I))       | R1 = 0.055, wR2 = 0.109                                       |                     |
| Largest diff. peak and hole       | 0.18 and -0.20 eÅ <sup>-3</sup>                               |                     |

**Table S3.** Crystal structure, crystal data and structure refinement of **8** (CCDC 2380039).

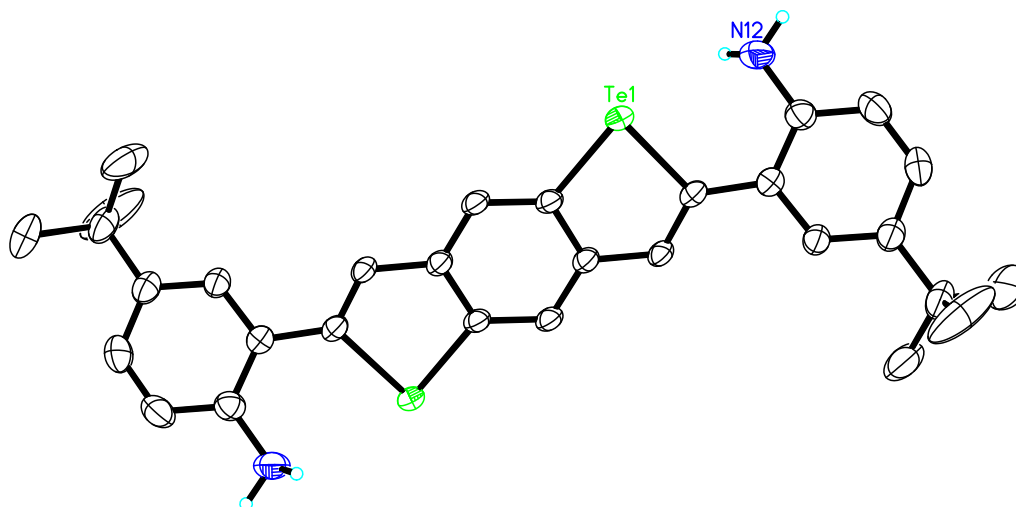

|                                      |                                                                                                                                                   |
|--------------------------------------|---------------------------------------------------------------------------------------------------------------------------------------------------|
| Empirical formula                    | $C_{30}H_{32}N_2Te_2$                                                                                                                             |
| Formula weight                       | 675.77                                                                                                                                            |
| Temperature                          | 200(2) K                                                                                                                                          |
| Wavelength                           | 0.71073 Å                                                                                                                                         |
| Crystal system                       | triclinic                                                                                                                                         |
| Space group                          | $P\bar{1}$                                                                                                                                        |
| Z                                    | 1                                                                                                                                                 |
| Unit cell dimensions                 | $a = 5.9242(6)$ Å $\alpha = 97.2719(14)$ deg.<br>$b = 6.7487(6)$ Å $\beta = 98.0695(13)$ deg.<br>$c = 17.7181(17)$ Å $\gamma = 101.6422(13)$ deg. |
| Volume                               | $678.12(11)$ Å <sup>3</sup>                                                                                                                       |
| Density (calculated)                 | $1.65$ g/cm <sup>3</sup>                                                                                                                          |
| Absorption coefficient               | $2.17$ mm <sup>-1</sup>                                                                                                                           |
| Crystal shape                        | prism                                                                                                                                             |
| Crystal size                         | $0.218 \times 0.042 \times 0.034$ mm <sup>3</sup>                                                                                                 |
| Crystal colour                       | yellow                                                                                                                                            |
| Theta range for data collection      | 2.4 to 30.1 deg.                                                                                                                                  |
| Index ranges                         | $-8 \leq h \leq 8, -9 \leq k \leq 9, -25 \leq l \leq 25$                                                                                          |
| Reflections collected                | 13809                                                                                                                                             |
| Independent reflections              | 3689 ( $R(\text{int}) = 0.0281$ )                                                                                                                 |
| Observed reflections                 | 3296 ( $I > 2\sigma(I)$ )                                                                                                                         |
| Absorption correction                | Semi-empirical from equivalents                                                                                                                   |
| Max. and min. transmission           | 0.97 and 0.85                                                                                                                                     |
| Refinement method                    | Full-matrix least-squares on $F^2$                                                                                                                |
| Data/restraints/parameters           | 3689 / 205 / 194                                                                                                                                  |
| Goodness-of-fit on $F^2$             | 1.07                                                                                                                                              |
| Final R indices ( $I > 2\sigma(I)$ ) | $R1 = 0.025, wR2 = 0.054$                                                                                                                         |
| Largest diff. peak and hole          | 0.64 and $-0.33$ eÅ <sup>-3</sup>                                                                                                                 |

**Table S4.** Crystal structure, crystal data and structure refinement of **9aa** (CCDC 2380040).

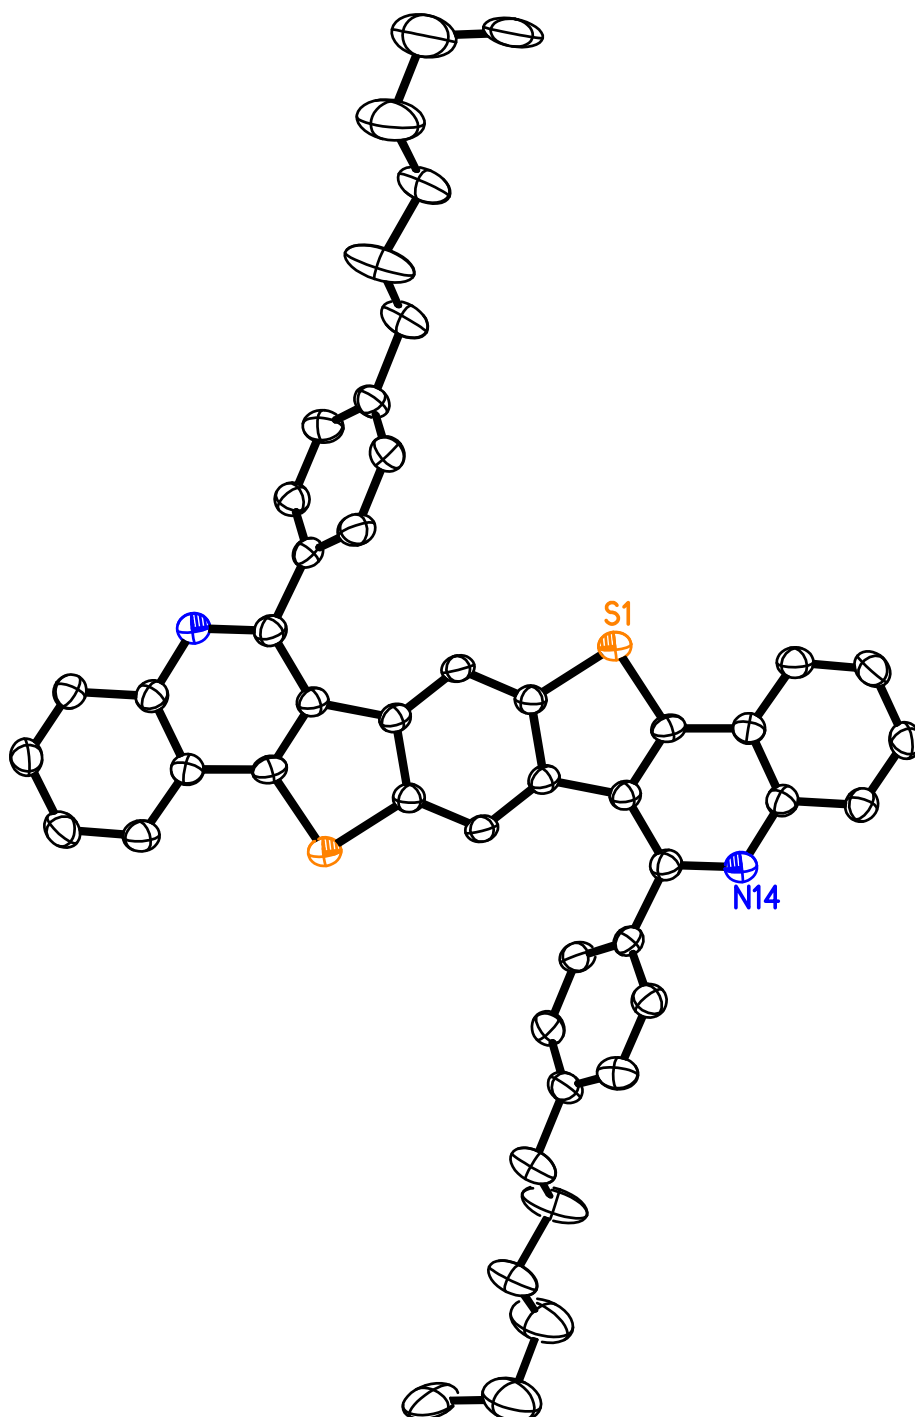



|                                   |                                                               |                           |
|-----------------------------------|---------------------------------------------------------------|---------------------------|
| Empirical formula                 | C <sub>48</sub> H <sub>44</sub> N <sub>2</sub> S <sub>2</sub> |                           |
| Formula weight                    | 712.97                                                        |                           |
| Temperature                       | 200(2) K                                                      |                           |
| Wavelength                        | 1.54178 Å                                                     |                           |
| Crystal system                    | triclinic                                                     |                           |
| Space group                       | P $\bar{1}$                                                   |                           |
| Z                                 | 1                                                             |                           |
| Unit cell dimensions              | a = 5.9858(3) Å                                               | $\alpha$ = 82.696(4) deg. |
|                                   | b = 10.7692(6) Å                                              | $\beta$ = 88.046(5) deg.  |
|                                   | c = 14.9923(8) Å                                              | $\gamma$ = 78.685(4) deg. |
| Volume                            | 939.92(9) Å <sup>3</sup>                                      |                           |
| Density (calculated)              | 1.26 g/cm <sup>3</sup>                                        |                           |
| Absorption coefficient            | 1.56 mm <sup>-1</sup>                                         |                           |
| Crystal shape                     | needle                                                        |                           |
| Crystal size                      | 0.273 x 0.020 x 0.010 mm <sup>3</sup>                         |                           |
| Crystal colour                    | colourless                                                    |                           |
| Theta range for data collection   | 3.0 to 62.0 deg.                                              |                           |
| Index ranges                      | -6 ≤ h ≤ 5, -12 ≤ k ≤ 11, -14 ≤ l ≤ 17                        |                           |
| Reflections collected             | 9036                                                          |                           |
| Independent reflections           | 2870 (R(int) = 0.0416)                                        |                           |
| Observed reflections              | 1966 (I > 2σ(I))                                              |                           |
| Absorption correction             | Semi-empirical from equivalents                               |                           |
| Max. and min. transmission        | 0.98 and 0.90                                                 |                           |
| Refinement method                 | Full-matrix least-squares on F <sup>2</sup>                   |                           |
| Data/restraints/parameters        | 2870 / 443 / 283                                              |                           |
| Goodness-of-fit on F <sup>2</sup> | 1.05                                                          |                           |
| Final R indices (I > 2σ(I))       | R1 = 0.049, wR2 = 0.094                                       |                           |
| Largest diff. peak and hole       | 0.23 and -0.22 eÅ <sup>-3</sup>                               |                           |

**Table S5.** Crystal structure, crystal data and structure refinement of **9ba** (CCDC 2380041).

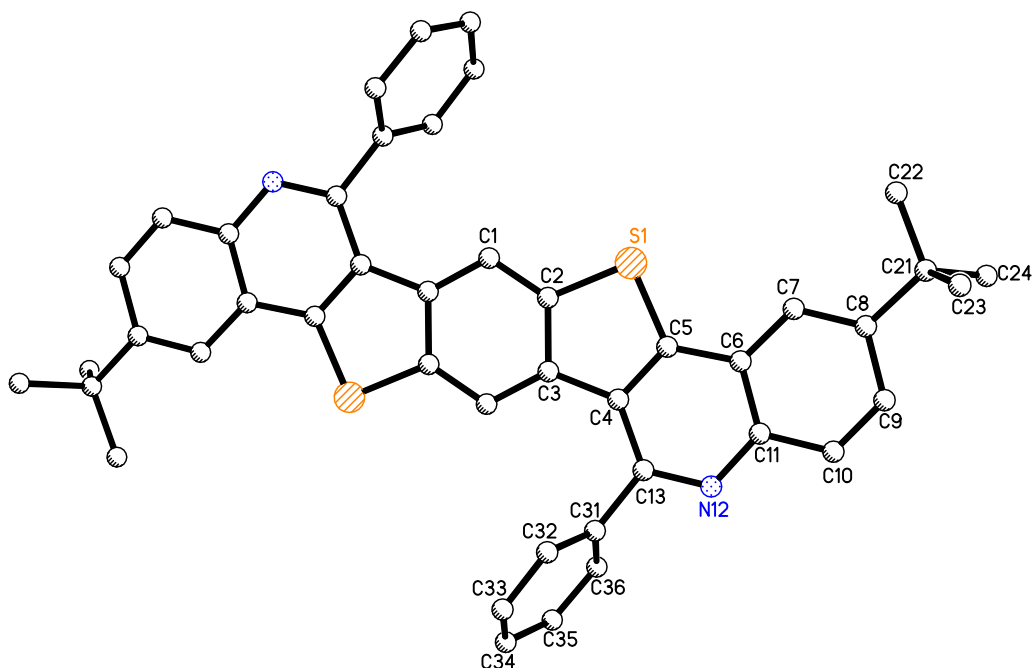

|                                   |                                                               |                            |
|-----------------------------------|---------------------------------------------------------------|----------------------------|
| Empirical formula                 | C <sub>44</sub> H <sub>36</sub> N <sub>2</sub> S <sub>2</sub> |                            |
| Formula weight                    | 656.87                                                        |                            |
| Temperature                       | 200(2) K                                                      |                            |
| Wavelength                        | 0.71073 Å                                                     |                            |
| Crystal system                    | triclinic                                                     |                            |
| Space group                       | P $\bar{1}$                                                   |                            |
| Z                                 | 1                                                             |                            |
| Unit cell dimensions              | a = 5.9420(7) Å                                               | $\alpha$ = 94.938(3) deg.  |
|                                   | b = 10.9486(14) Å                                             | $\beta$ = 92.627(3) deg.   |
|                                   | c = 13.5387(16) Å                                             | $\gamma$ = 101.794(3) deg. |
| Volume                            | 857.17(18) Å <sup>3</sup>                                     |                            |
| Density (calculated)              | 1.27 g/cm <sup>3</sup>                                        |                            |
| Absorption coefficient            | 0.19 mm <sup>-1</sup>                                         |                            |
| Crystal shape                     | rhomboid                                                      |                            |
| Crystal size                      | 0.262 x 0.059 x 0.014 mm <sup>3</sup>                         |                            |
| Crystal colour                    | yellow                                                        |                            |
| Theta range for data collection   | 1.5 to 29.2 deg.                                              |                            |
| Index ranges                      | -8 ≤ h ≤ 8, -14 ≤ k ≤ 14, -18 ≤ l ≤ 18                        |                            |
| Reflections collected             | 16548                                                         |                            |
| Independent reflections           | 4271 (R(int) = 0.0577)                                        |                            |
| Observed reflections              | 2879 (I > 2σ(I))                                              |                            |
| Absorption correction             | Semi-empirical from equivalents                               |                            |
| Max. and min. transmission        | 0.96 and 0.90                                                 |                            |
| Refinement method                 | Full-matrix least-squares on F <sup>2</sup>                   |                            |
| Data/restraints/parameters        | 4271 / 0 / 220                                                |                            |
| Goodness-of-fit on F <sup>2</sup> | 1.08                                                          |                            |
| Final R indices (I > 2σ(I))       | R1 = 0.049, wR2 = 0.118                                       |                            |
| Largest diff. peak and hole       | 0.36 and -0.34 eÅ <sup>-3</sup>                               |                            |

**Table S6.** Crystal structure, crystal data and structure refinement of **9bc** (CCDC 2380042).

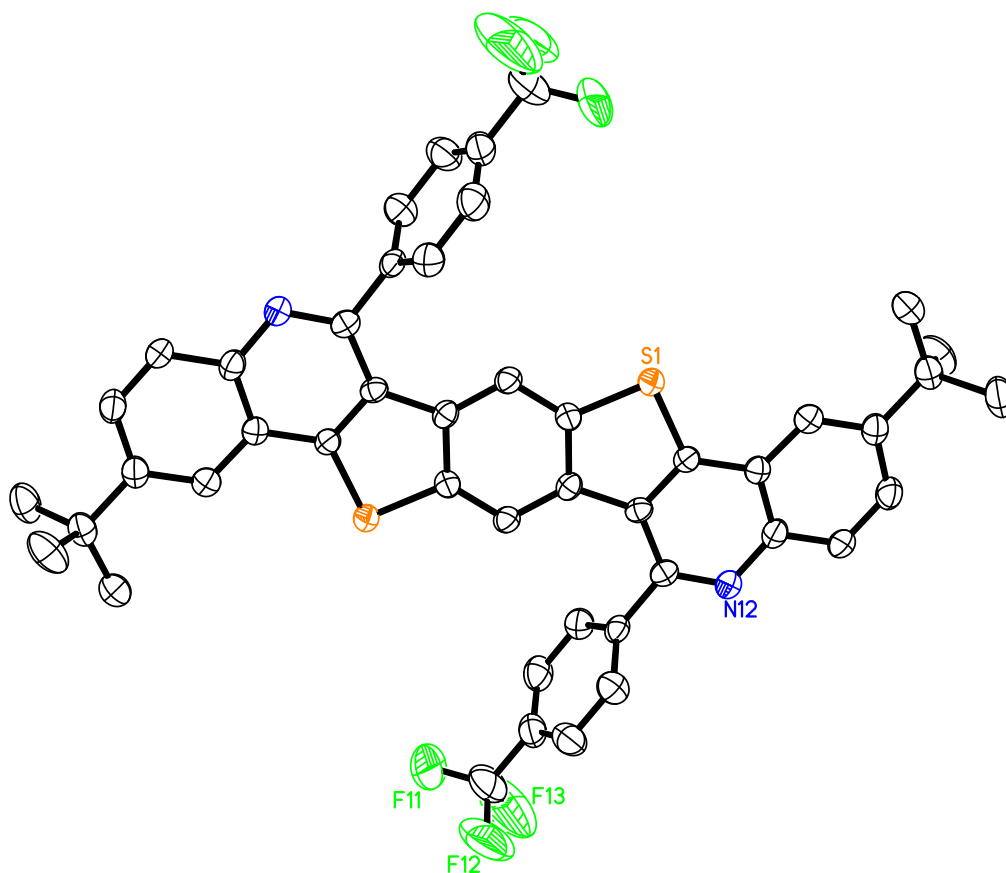

|                                 |                                                                              |                     |
|---------------------------------|------------------------------------------------------------------------------|---------------------|
| Empirical formula               | C <sub>46</sub> H <sub>34</sub> F <sub>6</sub> N <sub>2</sub> S <sub>2</sub> |                     |
| Formula weight                  | 792.87                                                                       |                     |
| Temperature                     | 200(2) K                                                                     |                     |
| Wavelength                      | 0.71073 Å                                                                    |                     |
| Crystal system                  | monoclinic                                                                   |                     |
| Space group                     | P2 <sub>1</sub> /n                                                           |                     |
| Z                               | 2                                                                            |                     |
| Unit cell dimensions            | a = 16.739(2) Å                                                              | α = 90 deg.         |
|                                 | b = 5.9610(7) Å                                                              | β = 101.617(3) deg. |
|                                 | c = 19.559(3) Å                                                              | γ = 90 deg.         |
| Volume                          | 1911.7(4) Å <sup>3</sup>                                                     |                     |
| Density (calculated)            | 1.38 g/cm <sup>3</sup>                                                       |                     |
| Absorption coefficient          | 0.20 mm <sup>-1</sup>                                                        |                     |
| Crystal shape                   | brick                                                                        |                     |
| Crystal size                    | 0.086 x 0.071 x 0.051 mm <sup>3</sup>                                        |                     |
| Crystal colour                  | colourless                                                                   |                     |
| Theta range for data collection | 1.8 to 25.4 deg.                                                             |                     |
| Index ranges                    | -20 ≤ h ≤ 20, -7 ≤ k ≤ 7, -23 ≤ l ≤ 23                                       |                     |
| Reflections collected           | 17512                                                                        |                     |
| Independent reflections         | 3493 (R(int) = 0.0867)                                                       |                     |
| Observed reflections            | 2120 (I > 2σ(I))                                                             |                     |
| Absorption correction           | Semi-empirical from equivalents                                              |                     |

|                                   |                                             |
|-----------------------------------|---------------------------------------------|
| Max. and min. transmission        | 0.96 and 0.89                               |
| Refinement method                 | Full-matrix least-squares on F <sup>2</sup> |
| Data/restraints/parameters        | 3493 / 0 / 256                              |
| Goodness-of-fit on F <sup>2</sup> | 1.03                                        |
| Final R indices (I>2sigma(I))     | R1 = 0.070, wR2 = 0.159                     |
| Largest diff. peak and hole       | 0.81 and -0.62 eÅ <sup>-3</sup>             |

**Table S7.** Crystal structure, crystal data and structure refinement of **10ba** (CCDC 2380043).

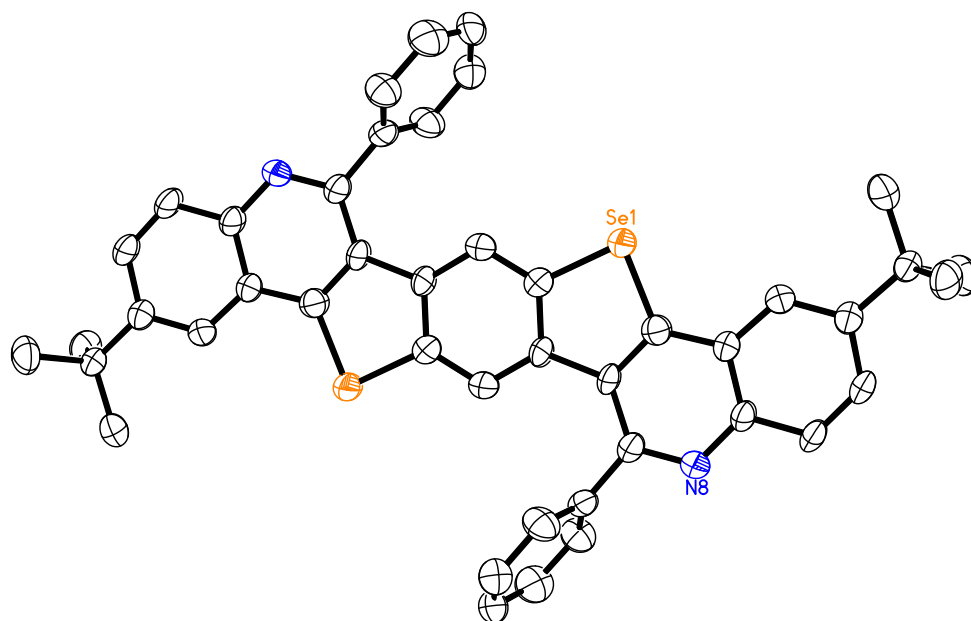

|                                   |                                                                |                            |
|-----------------------------------|----------------------------------------------------------------|----------------------------|
| Empirical formula                 | C <sub>44</sub> H <sub>36</sub> N <sub>2</sub> Se <sub>2</sub> |                            |
| Formula weight                    | 750.67                                                         |                            |
| Temperature                       | 200(2) K                                                       |                            |
| Wavelength                        | 1.54178 Å                                                      |                            |
| Crystal system                    | triclinic                                                      |                            |
| Space group                       | P $\bar{1}$                                                    |                            |
| Z                                 | 1                                                              |                            |
| Unit cell dimensions              | a = 5.8232(4) Å                                                | $\alpha$ = 99.647(5) deg.  |
|                                   | b = 11.2843(7) Å                                               | $\beta$ = 90.681(5) deg.   |
|                                   | c = 13.7511(8) Å                                               | $\gamma$ = 102.214(5) deg. |
| Volume                            | 869.60(10) Å <sup>3</sup>                                      |                            |
| Density (calculated)              | 1.43 g/cm <sup>3</sup>                                         |                            |
| Absorption coefficient            | 2.91 mm <sup>-1</sup>                                          |                            |
| Crystal shape                     | plate                                                          |                            |
| Crystal size                      | 0.037 x 0.035 x 0.018 mm <sup>3</sup>                          |                            |
| Crystal colour                    | pale yellow                                                    |                            |
| Theta range for data collection   | 3.3 to 62.2 deg.                                               |                            |
| Index ranges                      | -6 ≤ h ≤ 6, -8 ≤ k ≤ 12, -15 ≤ l ≤ 14                          |                            |
| Reflections collected             | 10186                                                          |                            |
| Independent reflections           | 2633 (R(int) = 0.0639)                                         |                            |
| Observed reflections              | 1669 (I > 2σ(I))                                               |                            |
| Absorption correction             | Semi-empirical from equivalents                                |                            |
| Max. and min. transmission        | 0.94 and 0.82                                                  |                            |
| Refinement method                 | Full-matrix least-squares on F <sup>2</sup>                    |                            |
| Data/restraints/parameters        | 2633 / 0 / 220                                                 |                            |
| Goodness-of-fit on F <sup>2</sup> | 0.99                                                           |                            |
| Final R indices (I > 2σ(I))       | R1 = 0.047, wR2 = 0.095                                        |                            |
| Largest diff. peak and hole       | 0.59 and -0.44 eÅ <sup>-3</sup>                                |                            |

**Table S8.** Crystal structure, crystal data and structure refinement of **10be** (CCDC 2380044).

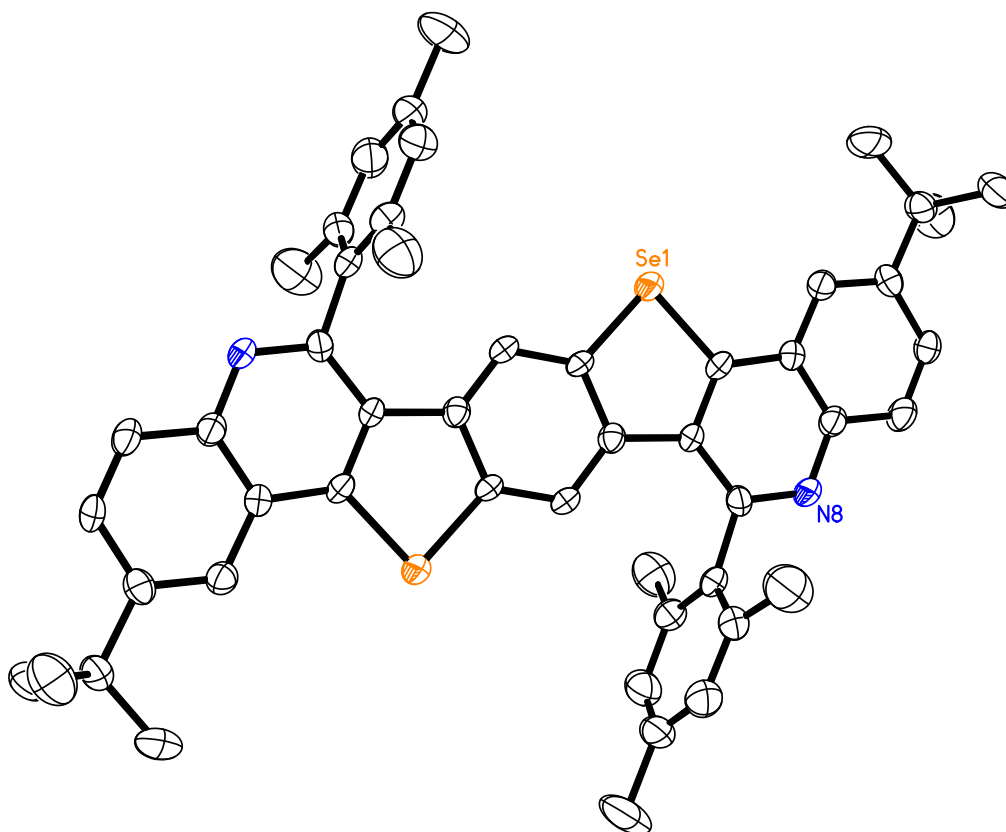

|                                 |                                                              |                          |
|---------------------------------|--------------------------------------------------------------|--------------------------|
| Empirical formula               | $C_{51}H_{50}Cl_2N_2Se_2$                                    |                          |
| Formula weight                  | 919.75                                                       |                          |
| Temperature                     | 200(2) K                                                     |                          |
| Wavelength                      | 0.71073 Å                                                    |                          |
| Crystal system                  | monoclinic                                                   |                          |
| Space group                     | C2/c                                                         |                          |
| Z                               | 4                                                            |                          |
| Unit cell dimensions            | $a = 26.6788(10)$ Å                                          | $\alpha = 90$ deg.       |
|                                 | $b = 10.4142(4)$ Å                                           | $\beta = 92.530(3)$ deg. |
|                                 | $c = 16.3568(7)$ Å                                           | $\gamma = 90$ deg.       |
| Volume                          | $4540.1(3)$ Å <sup>3</sup>                                   |                          |
| Density (calculated)            | 1.35 g/cm <sup>3</sup>                                       |                          |
| Absorption coefficient          | 1.78 mm <sup>-1</sup>                                        |                          |
| Crystal shape                   | irregular                                                    |                          |
| Crystal size                    | 0.088 x 0.080 x 0.035 mm <sup>3</sup>                        |                          |
| Crystal colour                  | yellow                                                       |                          |
| Theta range for data collection | 1.5 to 25.1 deg.                                             |                          |
| Index ranges                    | $-31 \leq h \leq 31, -12 \leq k \leq 12, -19 \leq l \leq 19$ |                          |
| Reflections collected           | 20865                                                        |                          |
| Independent reflections         | 4020 (R(int) = 0.1105)                                       |                          |
| Observed reflections            | 2500 ( $I > 2\sigma(I)$ )                                    |                          |
| Absorption correction           | Semi-empirical from equivalents                              |                          |

|                                   |                                             |
|-----------------------------------|---------------------------------------------|
| Max. and min. transmission        | 0.96 and 0.83                               |
| Refinement method                 | Full-matrix least-squares on F <sup>2</sup> |
| Data/restraints/parameters        | 4020 / 0 / 264                              |
| Goodness-of-fit on F <sup>2</sup> | 1.04                                        |
| Final R indices (I>2sigma(I))     | R1 = 0.055, wR2 = 0.121                     |
| Largest diff. peak and hole       | 0.67 and -0.79 eÅ <sup>-3</sup>             |

**Table S9.** Crystal structure, crystal data and structure refinement of **10cc** (CCDC 2380045).

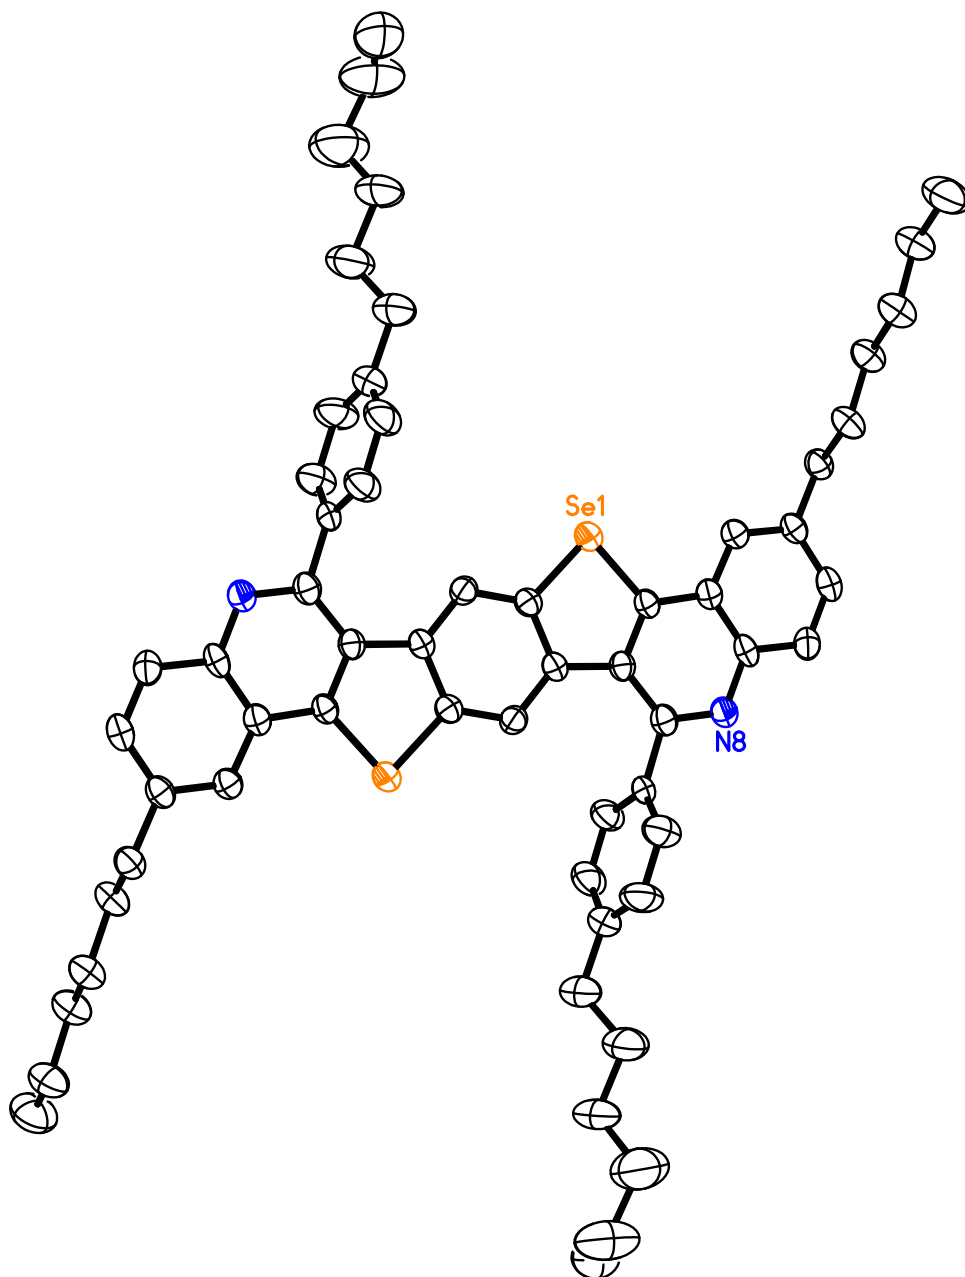

|                   |                       |
|-------------------|-----------------------|
| Empirical formula | $C_{60}H_{68}N_2Se_2$ |
| Formula weight    | 975.08                |
| Temperature       | 200(2) K              |
| Wavelength        | 1.54178 Å             |
| Crystal system    | monoclinic            |



|                                   |                                             |                    |
|-----------------------------------|---------------------------------------------|--------------------|
| Space group                       | P2 <sub>1</sub> /c                          |                    |
| Z                                 | 2                                           |                    |
| Unit cell dimensions              | a = 17.8271(8) Å                            | α = 90 deg.        |
|                                   | b = 4.9029(2) Å                             | β = 98.823(3) deg. |
|                                   | c = 28.5940(12) Å                           | γ = 90 deg.        |
| Volume                            | 2469.67(18) Å <sup>3</sup>                  |                    |
| Density (calculated)              | 1.31 g/cm <sup>3</sup>                      |                    |
| Absorption coefficient            | 2.17 mm <sup>-1</sup>                       |                    |
| Crystal shape                     | column                                      |                    |
| Crystal size                      | 0.264 x 0.016 x 0.014 mm <sup>3</sup>       |                    |
| Crystal colour                    | pale brown                                  |                    |
| Theta range for data collection   | 2.5 to 61.1 deg.                            |                    |
| Index ranges                      | -19 ≤ h ≤ 19, -5 ≤ k ≤ 4, -23 ≤ l ≤ 32      |                    |
| Reflections collected             | 17278                                       |                    |
| Independent reflections           | 3681 (R(int) = 0.0683)                      |                    |
| Observed reflections              | 2286 (I > 2σ(I))                            |                    |
| Absorption correction             | Semi-empirical from equivalents             |                    |
| Max. and min. transmission        | 0.97 and 0.83                               |                    |
| Refinement method                 | Full-matrix least-squares on F <sup>2</sup> |                    |
| Data/restraints/parameters        | 3681 / 0 / 291                              |                    |
| Goodness-of-fit on F <sup>2</sup> | 0.89                                        |                    |
| Final R indices (I > 2σ(I))       | R1 = 0.040, wR2 = 0.077                     |                    |
| Largest diff. peak and hole       | 0.36 and -0.33 eÅ <sup>-3</sup>             |                    |

**Table S10.** Crystal structure, crystal data and structure refinement of **11ba** (CCDC 2380046).

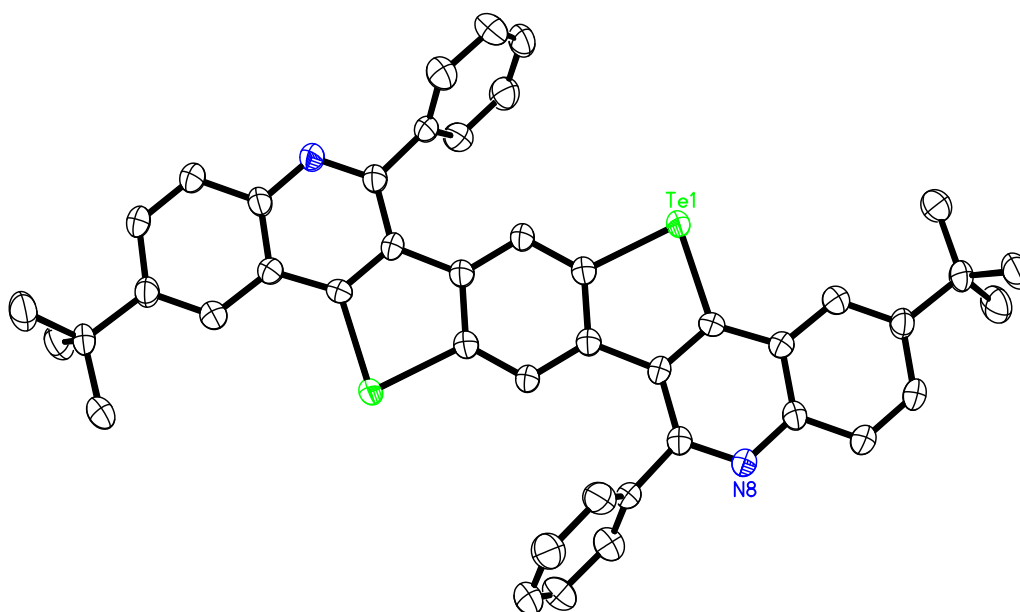

|                                   |                                                                |                           |
|-----------------------------------|----------------------------------------------------------------|---------------------------|
| Empirical formula                 | C <sub>44</sub> H <sub>36</sub> N <sub>2</sub> Te <sub>2</sub> |                           |
| Formula weight                    | 847.95                                                         |                           |
| Temperature                       | 200(2) K                                                       |                           |
| Wavelength                        | 1.54178 Å                                                      |                           |
| Crystal system                    | triclinic                                                      |                           |
| Space group                       | P $\bar{1}$                                                    |                           |
| Z                                 | 1                                                              |                           |
| Unit cell dimensions              | a = 5.7584(2) Å                                                | $\alpha$ = 77.226(3) deg. |
|                                   | b = 11.4517(5) Å                                               | $\beta$ = 88.956(3) deg.  |
|                                   | c = 14.1958(5) Å                                               | $\gamma$ = 77.594(3) deg. |
| Volume                            | 891.21(6) Å <sup>3</sup>                                       |                           |
| Density (calculated)              | 1.58 g/cm <sup>3</sup>                                         |                           |
| Absorption coefficient            | 13.16 mm <sup>-1</sup>                                         |                           |
| Crystal shape                     | plate                                                          |                           |
| Crystal size                      | 0.066 x 0.044 x 0.010 mm <sup>3</sup>                          |                           |
| Crystal colour                    | yellow                                                         |                           |
| Theta range for data collection   | 3.2 to 68.4 deg.                                               |                           |
| Index ranges                      | -6 ≤ h ≤ 6, -12 ≤ k ≤ 13, -10 ≤ l ≤ 17                         |                           |
| Reflections collected             | 10474                                                          |                           |
| Independent reflections           | 3156 (R(int) = 0.0216)                                         |                           |
| Observed reflections              | 2828 (I > 2σ(I))                                               |                           |
| Absorption correction             | Semi-empirical from equivalents                                |                           |
| Max. and min. transmission        | 0.68 and 0.54                                                  |                           |
| Refinement method                 | Full-matrix least-squares on F <sup>2</sup>                    |                           |
| Data/restraints/parameters        | 3156 / 0 / 220                                                 |                           |
| Goodness-of-fit on F <sup>2</sup> | 1.04                                                           |                           |
| Final R indices (I > 2σ(I))       | R1 = 0.036, wR2 = 0.085                                        |                           |
| Largest diff. peak and hole       | 1.99 and -0.67 eÅ <sup>-3</sup>                                |                           |

## 6 Computational Investigation

### 6.1 Computational Details

All quantum chemical calculations were performed using Orca 5.0.3.<sup>8</sup> The structures were optimized using the B3LYP/G<sup>9,10</sup> functional with the def2-TZVP<sup>11,12</sup> basis set, as used for the calculation of BBPQs, previously published.<sup>13</sup>

### 6.2 Overview of the Computed Molecules

Table S11. Energies of all computed structures.

| Compound | $E_{\text{HOMO}}$ [eV] | $E_{\text{LUMO}}$ [eV] | $E_{\text{g(calc)}}$ [eV] |
|----------|------------------------|------------------------|---------------------------|
| 9aa      | -5.88                  | -2.00                  | 3.88                      |
| 9ab      | -5.99                  | -2.11                  | 3.88                      |
| 9ac      | -6.02                  | -2.17                  | 3.85                      |
| 9ba      | -5.85                  | -1.97                  | 3.88                      |
| 9bb      | -5.91                  | -2.04                  | 3.86                      |
| 9bc      | -6.00                  | -2.14                  | 3.86                      |
| 9bd      | -5.95                  | -2.11                  | 3.84                      |
| 9be      | -5.84                  | -1.98                  | 3.87                      |
| 9bf      | -5.77                  | -2.14                  | 3.63                      |
| 9bg      | -5.93                  | -2.05                  | 3.88                      |
| 9ca      | -5.92                  | -2.04                  | 3.88                      |
| 9cb      | -5.96                  | -2.07                  | 3.89                      |
| 9cc      | -5.92                  | -2.09                  | 3.83                      |
| 9cd      | -5.94                  | -2.11                  | 3.83                      |
| 9ce      | -5.92                  | -2.07                  | 3.85                      |
| 10aa     | -5.94                  | -2.13                  | 3.81                      |
| 10ab     | -5.92                  | -2.15                  | 3.77                      |
| 10ba     | -5.87                  | -2.11                  | 3.77                      |
| 10bb     | -5.84                  | -2.08                  | 3.77                      |
| 10bc     | -5.93                  | -2.17                  | 3.76                      |
| 10bd     | -5.90                  | -2.14                  | 3.76                      |
| 10be     | -5.86                  | -2.07                  | 3.79                      |
| 10ca     | -5.87                  | -2.11                  | 3.75                      |
| 10cb     | -5.89                  | -2.16                  | 3.73                      |
| 10cc     | -5.85                  | -2.10                  | 3.75                      |
| 11ba     | -5.66                  | -2.14                  | 3.52                      |

### 6.3 Coordinates of the Optimized Geometries

9aa

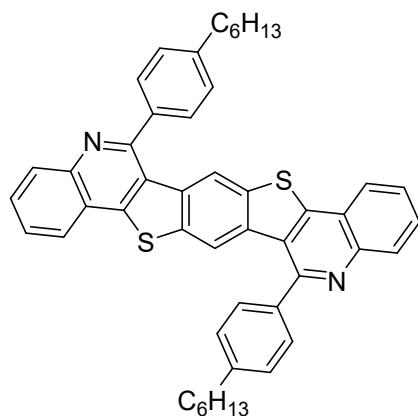

xyz

0 1

|    |              |             |              |
|----|--------------|-------------|--------------|
| 6  | -0.715723000 | 5.026305000 | -0.327076000 |
| 6  | -0.878374000 | 3.628468000 | -0.396559000 |
| 6  | 0.539827000  | 5.579615000 | -0.352129000 |
| 6  | 0.215420000  | 2.804301000 | -0.483907000 |
| 6  | 1.520686000  | 3.341714000 | -0.507194000 |
| 6  | 1.680157000  | 4.754712000 | -0.447721000 |
| 7  | 2.575983000  | 2.482412000 | -0.557929000 |
| 6  | 3.803184000  | 2.946474000 | -0.581982000 |
| 6  | 4.088940000  | 4.348576000 | -0.630002000 |
| 6  | 3.010557000  | 5.226825000 | -0.524422000 |
| 1  | -1.586269000 | 5.664743000 | -0.255058000 |
| 1  | 0.662873000  | 6.654393000 | -0.304685000 |
| 1  | -1.874272000 | 3.205509000 | -0.376812000 |
| 1  | 0.116031000  | 1.728375000 | -0.529356000 |
| 6  | 5.346521000  | 5.054867000 | -0.814928000 |
| 6  | 5.160076000  | 6.461717000 | -0.774450000 |
| 16 | 3.479939000  | 6.902439000 | -0.553879000 |
| 6  | 6.634838000  | 4.572229000 | -1.050848000 |
| 6  | 6.191444000  | 7.370375000 | -0.932390000 |
| 6  | 7.666222000  | 5.480875000 | -1.208741000 |

|    |              |              |              |
|----|--------------|--------------|--------------|
| 6  | 7.479746000  | 6.887732000  | -1.168444000 |
| 1  | 5.996182000  | 8.428909000  | -0.882975000 |
| 1  | 6.830105000  | 3.513689000  | -1.100177000 |
| 16 | 9.346398000  | 5.040168000  | -1.428911000 |
| 6  | 9.815747000  | 6.715789000  | -1.458676000 |
| 6  | 8.737316000  | 7.594044000  | -1.353436000 |
| 6  | 9.023040000  | 8.996149000  | -1.401982000 |
| 6  | 11.146162000 | 7.187875000  | -1.535235000 |
| 6  | 11.305594000 | 8.600894000  | -1.476018000 |
| 7  | 10.250286000 | 9.460177000  | -1.425878000 |
| 6  | 12.610869000 | 9.138314000  | -1.498996000 |
| 6  | 12.286518000 | 6.362969000  | -1.630392000 |
| 6  | 13.542072000 | 6.916291000  | -1.655188000 |
| 6  | 13.704693000 | 8.314138000  | -1.585875000 |
| 1  | 14.700598000 | 8.737089000  | -1.605392000 |
| 1  | 12.710236000 | 10.214248000 | -1.453721000 |
| 1  | 12.163516000 | 5.288181000  | -1.677701000 |
| 1  | 14.412645000 | 6.277853000  | -1.726876000 |
| 6  | 4.883343000  | 1.929888000  | -0.524889000 |
| 6  | 4.959196000  | 0.918347000  | -1.481772000 |
| 6  | 5.813348000  | 1.937957000  | 0.510073000  |
| 6  | 5.962585000  | -0.034086000 | -1.416378000 |
| 6  | 6.909166000  | -0.026666000 | -0.387911000 |
| 6  | 6.808935000  | 0.970873000  | 0.579929000  |
| 6  | 7.943067000  | 10.012780000 | -1.460528000 |
| 6  | 7.011973000  | 10.002388000 | -2.494493000 |
| 6  | 7.868505000  | 11.026785000 | -0.506118000 |
| 6  | 6.016664000  | 10.969658000 | -2.565829000 |
| 6  | 5.917831000  | 11.969745000 | -1.600500000 |
| 6  | 6.865347000  | 11.979331000 | -0.572883000 |
| 1  | 5.761553000  | 2.709013000  | 1.268191000  |
| 1  | 4.225544000  | 0.887905000  | -2.276126000 |

|   |              |              |              |
|---|--------------|--------------|--------------|
| 1 | 7.062589000  | 9.229296000  | -3.250613000 |
| 1 | 8.602911000  | 11.058852000 | 0.287469000  |
| 1 | 7.510647000  | 1.003178000  | 1.401268000  |
| 1 | 6.014331000  | -0.805072000 | -2.176562000 |
| 1 | 6.814442000  | 12.752095000 | 0.185553000  |
| 1 | 5.313994000  | 10.935365000 | -3.386266000 |
| 6 | 4.842135000  | 13.031905000 | -1.621179000 |
| 6 | 3.860561000  | 12.988073000 | -2.786573000 |
| 1 | 5.327772000  | 14.013564000 | -1.602704000 |
| 1 | 4.280112000  | 12.969798000 | -0.682704000 |
| 6 | 2.819188000  | 14.101764000 | -2.717051000 |
| 1 | 3.349244000  | 12.020408000 | -2.803795000 |
| 1 | 4.406269000  | 13.064769000 | -3.732252000 |
| 6 | 1.825889000  | 14.073320000 | -3.875023000 |
| 1 | 3.327109000  | 15.072366000 | -2.699826000 |
| 1 | 2.273097000  | 14.028723000 | -1.769987000 |
| 6 | 0.780377000  | 15.183784000 | -3.808230000 |
| 1 | 1.319381000  | 13.101740000 | -3.894029000 |
| 1 | 2.371801000  | 14.148310000 | -4.822193000 |
| 6 | -0.207309000 | 15.146301000 | -4.970819000 |
| 1 | 1.287507000  | 16.153907000 | -3.789187000 |
| 1 | 0.235512000  | 15.107676000 | -2.861627000 |
| 1 | 0.308865000  | 15.252557000 | -5.927960000 |
| 1 | -0.942201000 | 15.949964000 | -4.898185000 |
| 1 | -0.751118000 | 14.198862000 | -4.993575000 |
| 6 | 7.986096000  | -1.087629000 | -0.369565000 |
| 6 | 8.954125000  | -1.058689000 | 0.807579000  |
| 1 | 8.558933000  | -1.011908000 | -1.300536000 |
| 1 | 7.502013000  | -2.069441000 | -0.407234000 |
| 6 | 9.994680000  | -2.173097000 | 0.737290000  |
| 1 | 8.397116000  | -1.145190000 | 1.745815000  |
| 1 | 9.466848000  | -0.092250000 | 0.841935000  |

|   |              |              |              |
|---|--------------|--------------|--------------|
| 6 | 10.974373000 | -2.159694000 | 1.907054000  |
| 1 | 10.551913000 | -2.089873000 | -0.202419000 |
| 1 | 9.485622000  | -3.142642000 | 0.702809000  |
| 6 | 12.019559000 | -3.270399000 | 1.839059000  |
| 1 | 10.417336000 | -2.245544000 | 2.846791000  |
| 1 | 11.481543000 | -1.188964000 | 1.943749000  |
| 6 | 12.993274000 | -3.248348000 | 3.013761000  |
| 1 | 12.575781000 | -3.183201000 | 0.900050000  |
| 1 | 11.511775000 | -4.239658000 | 1.801963000  |
| 1 | 13.537564000 | -2.301800000 | 3.054812000  |
| 1 | 13.728316000 | -4.051766000 | 2.939934000  |
| 1 | 12.465579000 | -3.365993000 | 3.963256000  |

**9ab**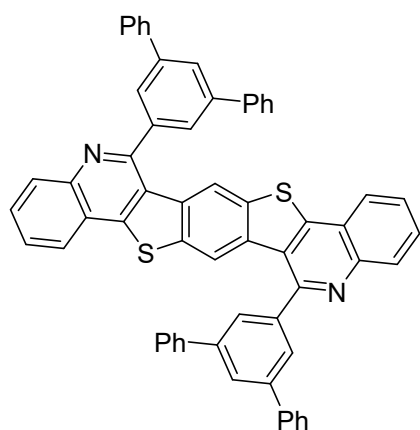

xyz

0 1

|    |              |             |              |
|----|--------------|-------------|--------------|
| 6  | -0.234347000 | 4.355096000 | 0.924978000  |
| 6  | -0.262135000 | 2.952031000 | 0.798971000  |
| 6  | 0.938431000  | 5.044116000 | 0.742435000  |
| 6  | 0.882664000  | 2.257238000 | 0.498786000  |
| 6  | 2.105632000  | 2.936145000 | 0.308587000  |
| 6  | 2.127048000  | 4.354198000 | 0.425342000  |
| 7  | 3.223520000  | 2.202684000 | 0.052999000  |
| 6  | 4.376806000  | 2.798926000 | -0.136422000 |
| 6  | 4.503871000  | 4.226538000 | -0.159456000 |
| 6  | 3.373032000  | 4.972784000 | 0.172941000  |
| 1  | -1.143276000 | 4.890274000 | 1.165688000  |
| 1  | 0.956337000  | 6.123005000 | 0.832861000  |
| 1  | -1.193959000 | 2.421585000 | 0.945051000  |
| 1  | 0.887750000  | 1.179680000 | 0.407381000  |
| 6  | 5.631833000  | 5.080745000 | -0.499630000 |
| 6  | 5.314462000  | 6.452274000 | -0.316704000 |
| 16 | 3.656813000  | 6.689927000 | 0.191979000  |
| 6  | 6.902048000  | 4.767187000 | -0.986643000 |
| 6  | 6.209878000  | 7.478828000 | -0.559778000 |
| 6  | 7.797484000  | 5.793739000 | -1.229650000 |
| 6  | 7.480090000  | 7.165270000 | -1.046781000 |



|    |              |              |              |
|----|--------------|--------------|--------------|
| 1  | 5.920877000  | 8.501043000  | -0.381135000 |
| 1  | 7.191081000  | 3.744971000  | -1.165163000 |
| 16 | 9.455111000  | 5.556119000  | -1.738430000 |
| 6  | 9.738692000  | 7.273303000  | -1.720012000 |
| 6  | 8.607912000  | 8.019504000  | -1.387326000 |
| 6  | 8.734751000  | 9.447121000  | -1.410908000 |
| 6  | 10.984473000 | 7.891991000  | -1.973173000 |
| 6  | 11.005722000 | 9.310091000  | -1.856979000 |
| 7  | 9.887839000  | 10.043486000 | -1.601135000 |
| 6  | 12.228488000 | 9.989118000  | -2.048029000 |
| 6  | 12.173057000 | 7.202137000  | -2.290535000 |
| 6  | 13.345634000 | 7.891273000  | -2.473923000 |
| 6  | 13.373253000 | 9.294393000  | -2.348503000 |
| 1  | 14.304919000 | 9.824933000  | -2.495245000 |
| 1  | 12.223273000 | 11.066710000 | -1.957043000 |
| 1  | 12.155283000 | 6.123208000  | -2.380500000 |
| 1  | 14.254535000 | 7.356145000  | -2.714848000 |
| 6  | 5.552934000  | 1.905319000  | -0.285594000 |
| 6  | 5.513600000  | 0.841224000  | -1.180465000 |
| 6  | 6.681292000  | 2.094246000  | 0.506972000  |
| 6  | 6.605876000  | -0.017335000 | -1.318067000 |
| 6  | 7.738905000  | 0.211643000  | -0.534660000 |
| 6  | 7.792563000  | 1.260933000  | 0.384126000  |
| 6  | 7.558509000  | 10.340534000 | -1.261363000 |
| 6  | 6.429519000  | 10.150707000 | -2.052830000 |
| 6  | 7.598264000  | 11.405200000 | -0.367201000 |
| 6  | 5.318118000  | 10.983787000 | -1.929603000 |
| 6  | 5.372230000  | 12.033686000 | -1.011549000 |
| 6  | 6.505855000  | 12.263548000 | -0.229257000 |
| 1  | 6.694669000  | 2.897774000  | 1.230250000  |
| 1  | 4.611971000  | 0.674036000  | -1.752426000 |
| 1  | 6.415815000  | 9.346732000  | -2.775616000 |

|   |              |              |              |
|---|--------------|--------------|--------------|
| 1 | 8.500339000  | 11.573040000 | 0.203866000  |
| 1 | 4.497721000  | 12.653733000 | -0.868376000 |
| 1 | 8.613355000  | -0.408534000 | -0.677603000 |
| 6 | 6.541468000  | 13.382856000 | 0.736729000  |
| 6 | 5.956509000  | 14.614700000 | 0.428062000  |
| 6 | 7.161131000  | 13.238125000 | 1.981689000  |
| 6 | 5.989050000  | 15.666306000 | 1.333180000  |
| 6 | 7.193358000  | 14.288692000 | 2.887977000  |
| 6 | 6.607271000  | 15.507770000 | 2.567918000  |
| 1 | 6.632807000  | 16.327211000 | 3.274176000  |
| 1 | 5.537932000  | 16.614419000 | 1.070150000  |
| 1 | 7.600930000  | 12.286488000 | 2.249380000  |
| 1 | 7.671121000  | 14.152479000 | 3.849621000  |
| 1 | 5.495116000  | 14.756187000 | -0.540431000 |
| 6 | 9.014876000  | 1.518537000  | 1.175333000  |
| 6 | 9.448105000  | 2.828594000  | 1.404552000  |
| 6 | 9.775029000  | 0.467516000  | 1.696028000  |
| 6 | 10.930790000 | 0.717456000  | 2.422860000  |
| 6 | 10.605543000 | 3.079007000  | 2.128072000  |
| 6 | 11.351708000 | 2.024380000  | 2.640928000  |
| 1 | 8.888751000  | 3.657589000  | 0.991874000  |
| 1 | 10.929257000 | 4.100143000  | 2.282708000  |
| 1 | 11.500589000 | -0.109980000 | 2.825707000  |
| 1 | 12.253865000 | 2.219043000  | 3.205899000  |
| 1 | 9.444077000  | -0.552162000 | 1.548153000  |
| 6 | 4.095231000  | 10.725379000 | -2.719664000 |
| 6 | 3.334407000  | 11.775855000 | -3.240461000 |
| 6 | 3.662158000  | 9.415055000  | -2.947631000 |
| 6 | 2.504114000  | 9.163859000  | -3.669899000 |
| 6 | 1.757220000  | 10.217951000 | -4.182797000 |
| 6 | 2.178038000  | 11.525129000 | -3.966062000 |
| 1 | 3.665234000  | 12.795718000 | -3.093559000 |

|   |             |              |              |
|---|-------------|--------------|--------------|
| 1 | 1.607669000 | 12.352146000 | -4.368964000 |
| 1 | 4.222148000 | 8.586506000  | -2.534970000 |
| 1 | 2.180500000 | 8.142538000  | -3.823530000 |
| 1 | 0.854590000 | 10.022671000 | -4.746799000 |
| 6 | 6.570806000 | -1.135884000 | -2.284965000 |
| 6 | 5.952843000 | -0.989784000 | -3.530607000 |
| 6 | 7.154669000 | -2.368301000 | -1.976516000 |
| 6 | 7.122684000 | -3.419169000 | -2.882512000 |
| 6 | 5.921199000 | -2.039604000 | -4.437781000 |
| 6 | 6.506162000 | -3.259279000 | -4.117927000 |
| 1 | 6.481071000 | -4.078139000 | -4.824874000 |
| 1 | 7.572904000 | -4.367762000 | -2.619670000 |
| 1 | 7.614733000 | -2.510784000 | -1.007537000 |
| 1 | 5.513937000 | -0.037669000 | -3.798063000 |
| 1 | 5.444777000 | -1.902362000 | -5.399944000 |

9ac

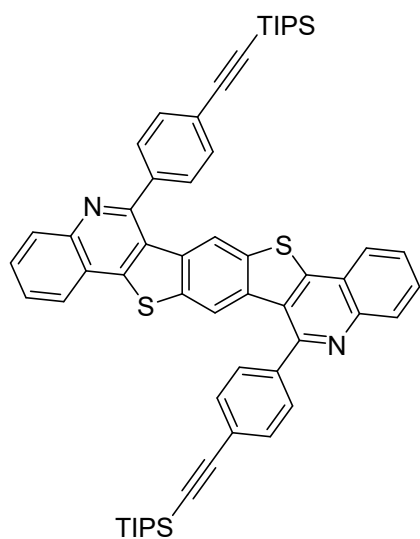

xyz

0 1

|   |                   |                   |                   |
|---|-------------------|-------------------|-------------------|
| C | 0.41197968500240  | 2.78650014783402  | -3.67846238624875 |
| C | 0.78073398618631  | 1.42308407934768  | -3.78141571293221 |
| C | 1.29469117349518  | 3.71008740355074  | -3.15482169565349 |
| C | 2.02294763487918  | 1.00022024044044  | -3.35358897433908 |
| C | 2.95268282789622  | 1.92278549396844  | -2.80558270330994 |
| C | 2.57904397495841  | 3.30222394396631  | -2.71527710202161 |
| N | 4.15241281102908  | 1.45661688001329  | -2.36117848877608 |
| C | 5.04189104140281  | 2.27959306481935  | -1.84729788095817 |
| C | 4.83448268572804  | 3.70371003094353  | -1.80865376050915 |
| C | 3.57688296966925  | 4.17825699146367  | -2.21029162859444 |
| H | -0.57540629942698 | 3.10784091647616  | -4.01732833290129 |
| H | 1.01252004332909  | 4.76331931331441  | -3.08233389296344 |
| H | 0.07283797379413  | 0.70341260914587  | -4.19910290040126 |
| H | 2.32992520629492  | -0.04528504298174 | -3.41212998070006 |
| C | 5.73789753518316  | 4.79537137147973  | -1.45791226432418 |
| C | 5.07999802380514  | 6.05936819513630  | -1.53260981254331 |
| S | 3.41211564663417  | 5.91568525474607  | -2.07736146697241 |
| C | 7.10765654156677  | 4.78482128761113  | -1.15156723702058 |
| C | 5.71075697916057  | 7.26515885295181  | -1.24352420298380 |

|   |                   |                   |                   |
|---|-------------------|-------------------|-------------------|
| C | 7.74122160924709  | 5.99174694423846  | -0.87375642649494 |
| C | 7.06413947672554  | 7.24771423121096  | -0.87154484776613 |
| H | 5.16472631332623  | 8.20197142712451  | -1.32547448429208 |
| H | 7.67391765998691  | 3.85654752332167  | -1.14925378412805 |
| S | 9.46162334735649  | 6.15707369298792  | -0.53918059615804 |
| C | 9.29411769599424  | 7.89335401936378  | -0.39492918537783 |
| C | 7.97294250589731  | 8.34166872421374  | -0.54257591937545 |
| C | 7.73902196266760  | 9.75480238669157  | -0.39810592655503 |
| C | 10.36889209154833 | 8.80087340989974  | -0.19671360285296 |
| C | 10.01459692649508 | 10.18830082742837 | -0.18442635553018 |
| N | 8.72529067431357  | 10.61727661890205 | -0.27027860785507 |
| C | 11.04697102190704 | 11.15324917348796 | -0.04656189254120 |
| C | 11.72781324554866 | 8.42372136536994  | -0.05443856374037 |
| C | 12.70711839781470 | 9.38725127630185  | 0.08320357163915  |
| C | 12.36391527728547 | 10.76115122072449 | 0.08343746153403  |
| H | 13.14935628116374 | 11.51272475206175 | 0.19171076829896  |
| H | 10.75289540844440 | 12.20405729561670 | -0.03976510006302 |
| H | 11.99394122413991 | 7.36387255566130  | -0.06188860930954 |
| H | 13.75263865916121 | 9.08996343874866  | 0.19059432608868  |
| C | 6.25867644984929  | 1.63860757137295  | -1.27795569484751 |
| C | 6.96356481689348  | 0.68164153337134  | -2.02397600702326 |
| C | 6.68062303685908  | 1.92228067037288  | 0.03115453059096  |
| C | 8.08935943126524  | 0.05738614024104  | -1.49619488979182 |
| C | 8.52894379404177  | 0.35747328428703  | -0.18989963866308 |
| C | 7.79646268159326  | 1.29174006480899  | 0.57182728175890  |
| H | 8.11615365154706  | 1.51541912327326  | 1.59103903806700  |
| H | 6.12473510922952  | 2.64529138696302  | 0.63140126082340  |
| H | 8.64406628605600  | -0.67225545634238 | -2.08877112826818 |
| H | 6.61385272357788  | 0.43636614576963  | -3.02805267962692 |
| C | 6.36897598970680  | 10.33368753066543 | -0.34443869040643 |
| C | 5.40062113147995  | 9.82164007030030  | 0.53439213159798  |
| C | 6.05034916190376  | 11.45758853000373 | -1.12221598695538 |

|    |                   |                   |                   |
|----|-------------------|-------------------|-------------------|
| C  | 4.13696997726067  | 10.39762651493441 | 0.61538697408950  |
| C  | 3.80322504611897  | 11.50562938374270 | -0.19102061431367 |
| C  | 4.78397924838700  | 12.02989984910125 | -1.05883672868684 |
| H  | 4.53717132749863  | 12.89348939927573 | -1.67889186762180 |
| H  | 6.81506951498092  | 11.87569700813031 | -1.77869624164620 |
| H  | 5.64480035746667  | 8.96439015082354  | 1.16488249865273  |
| H  | 3.39220279091751  | 9.99785615415734  | 1.30573743047527  |
| C  | 2.50013064183575  | 12.08369596586047 | -0.12592156314882 |
| C  | 1.37714740293770  | 12.56536252555133 | -0.07200111542305 |
| Si | -0.31157283451665 | 13.30510971390226 | -0.00460021631368 |
| C  | -0.21807577222118 | 14.83448689575026 | 1.12741070731714  |
| C  | -1.53074729727656 | 11.98868442716714 | 0.65440490586208  |
| C  | -0.74686664247958 | 13.81881388219300 | -1.78820950572915 |
| C  | -0.89818139757443 | 11.00315580492832 | 1.64820930037017  |
| H  | -1.62475532487510 | 10.22776136990206 | 1.94748745034613  |
| H  | -0.56587766151647 | 11.51116680394562 | 2.56799342215974  |
| H  | -0.01963459869125 | 10.49891680943712 | 1.21916170094786  |
| C  | -2.80455636298810 | 12.62469902308091 | 1.23518453937168  |
| H  | -1.82228006080739 | 11.41145331028680 | -0.24266814328672 |
| H  | -3.53946174428710 | 11.84987571792300 | 1.51386493874766  |
| H  | -3.29783816305435 | 13.30603328327062 | 0.52493625589363  |
| H  | -2.58505821128277 | 13.20429888439222 | 2.14660355779962  |
| C  | -0.70766684087935 | 12.62797021286021 | -2.75604474853878 |
| H  | 0.25639032595208  | 12.09783441558115 | -2.71148700809058 |
| H  | -0.86503555365096 | 12.95706275831413 | -3.79776295974508 |
| H  | -1.50023753823218 | 11.89604999562307 | -2.52598802724252 |
| C  | -2.07662400721832 | 14.58019281696502 | -1.88597612275650 |
| H  | 0.06610869648301  | 14.51058570391641 | -2.07612701257766 |
| H  | -2.93082323419829 | 13.92981699316458 | -1.63520149617763 |
| H  | -2.24647257555701 | 14.95175708920059 | -2.91130166008345 |
| H  | -2.11314355516912 | 15.44924918089202 | -1.20979143435055 |
| C  | 0.24343182954436  | 14.47000002395466 | 2.54630816738231  |

|    |                   |                   |                   |
|----|-------------------|-------------------|-------------------|
| H  | -0.43691084457042 | 13.75583822449373 | 3.03472767448189  |
| H  | 0.29751025228974  | 15.36660284336784 | 3.18774435492359  |
| H  | 1.24639364615827  | 14.01272096754849 | 2.53074860151640  |
| C  | 0.67577839424987  | 15.92557737415735 | 0.51941477441375  |
| H  | -1.24983786430249 | 15.22806466143411 | 1.19008225163980  |
| H  | 1.70438005489206  | 15.55711211583611 | 0.37004888583770  |
| H  | 0.73391295655998  | 16.80509833453226 | 1.18367140318779  |
| H  | 0.30314252579280  | 16.27332932969012 | -0.45664564559291 |
| C  | 9.69187454604632  | -0.26698213667738 | 0.35228864598291  |
| C  | 10.69185079172481 | -0.79396364298938 | 0.81947073350466  |
| Si | 12.20167528259950 | -1.56294406769524 | 1.54942755009182  |
| C  | 11.91266189783193 | -1.69691616737889 | 3.42755199211717  |
| C  | 11.65628212589912 | -0.32470020530940 | 4.06795590434865  |
| H  | 12.50412821482658 | 0.36362081608421  | 3.93147329836719  |
| H  | 11.47949041380673 | -0.42082895596195 | 5.15324037092955  |
| H  | 10.76691908181476 | 0.15640378540107  | 3.62867169715144  |
| C  | 10.77470970617922 | -2.67709349896032 | 3.74906872693678  |
| H  | 12.84997681554244 | -2.10478533088201 | 3.84991051109545  |
| H  | 10.98496122965392 | -3.69424133313871 | 3.38350063143061  |
| H  | 9.82748073032017  | -2.34921093854760 | 3.28929004165098  |
| H  | 10.60704423318825 | -2.74496173492120 | 4.83788664769809  |
| C  | 12.36422334335267 | -3.29391275964192 | 0.76883895107310  |
| C  | 12.46727805219660 | -3.22697632526533 | -0.76132039185561 |
| H  | 11.63225441731623 | -2.66029565005133 | -1.20188125959043 |
| H  | 12.46107724816001 | -4.23760009593068 | -1.20497257049330 |
| H  | 13.40418575335133 | -2.74014189578042 | -1.08078322942028 |
| C  | 13.50749534169351 | -4.12118243157666 | 1.37396590954650  |
| H  | 11.41015610055333 | -3.79369145419791 | 1.01803470348287  |
| H  | 14.49049729929261 | -3.68382212712217 | 1.13360450106882  |
| H  | 13.50734685847423 | -5.14980959978276 | 0.97370786517628  |
| H  | 13.43740381906188 | -4.19410701435380 | 2.47110320590633  |
| C  | 13.71091196740505 | -0.46843399220676 | 1.12504578897470  |

|   |                   |                   |                  |
|---|-------------------|-------------------|------------------|
| C | 13.37799427073706 | 1.02680576261166  | 1.01360759090563 |
| H | 12.58044844268568 | 1.21397647625043  | 0.27944668969328 |
| H | 14.26776566529476 | 1.60402222165581  | 0.70698372102391 |
| H | 13.03757031059267 | 1.43983400077141  | 1.97700441581534 |
| C | 14.88340208157685 | -0.70718451265616 | 2.09073022172591 |
| H | 14.02541598495906 | -0.81223390648253 | 0.12221660032301 |
| H | 15.77890005085471 | -0.14869576281319 | 1.76779066324969 |
| H | 15.16489585806880 | -1.76925391636489 | 2.15949702905677 |
| H | 14.64038067751748 | -0.36600803806190 | 3.11027383025467 |



**9ba**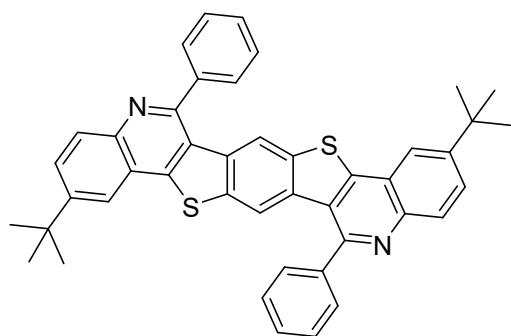

xyz

0 1

|    |              |             |              |
|----|--------------|-------------|--------------|
| 6  | -0.754906000 | 5.048612000 | -0.305275000 |
| 6  | -0.836674000 | 3.631763000 | -0.313959000 |
| 6  | 0.496935000  | 5.617965000 | -0.327345000 |
| 6  | 0.280284000  | 2.840720000 | -0.337762000 |
| 6  | 1.569775000  | 3.414490000 | -0.356747000 |
| 6  | 1.668257000  | 4.830295000 | -0.358314000 |
| 7  | 2.656139000  | 2.595439000 | -0.346781000 |
| 6  | 3.864743000  | 3.108038000 | -0.364427000 |
| 6  | 4.095605000  | 4.516073000 | -0.463583000 |
| 6  | 2.979164000  | 5.352773000 | -0.423963000 |
| 1  | 0.608053000  | 6.692660000 | -0.327289000 |
| 1  | -1.808787000 | 3.157997000 | -0.297623000 |
| 1  | 0.208819000  | 1.761433000 | -0.335838000 |
| 6  | 5.327957000  | 5.266770000 | -0.644385000 |
| 6  | 5.083027000  | 6.665014000 | -0.670568000 |
| 16 | 3.380653000  | 7.044174000 | -0.514549000 |
| 6  | 6.641199000  | 4.829029000 | -0.822837000 |
| 6  | 6.081170000  | 7.608334000 | -0.839427000 |
| 6  | 7.639360000  | 5.772326000 | -0.991961000 |
| 6  | 7.394649000  | 7.170749000 | -1.017662000 |
| 1  | 5.841000000  | 8.658853000 | -0.841487000 |
| 1  | 6.881117000  | 3.778424000 | -0.820974000 |

|    |              |              |              |
|----|--------------|--------------|--------------|
| 16 | 9.341391000  | 5.393645000  | -1.149828000 |
| 6  | 9.742191000  | 7.084620000  | -1.240281000 |
| 6  | 8.627201000  | 7.920789000  | -1.198731000 |
| 6  | 8.858296000  | 9.331056000  | -1.295580000 |
| 6  | 11.054934000 | 7.607594000  | -1.306500000 |
| 6  | 11.153871000 | 9.025598000  | -1.305026000 |
| 7  | 10.064973000 | 9.844342000  | -1.312763000 |
| 6  | 12.439848000 | 9.597223000  | -1.323799000 |
| 6  | 12.224026000 | 6.826501000  | -1.340287000 |
| 6  | 13.480932000 | 7.395347000  | -1.362683000 |
| 6  | 13.563095000 | 8.806805000  | -1.350565000 |
| 1  | 14.530062000 | 9.286473000  | -1.366378000 |
| 1  | 12.512203000 | 10.676469000 | -1.323672000 |
| 1  | 12.118773000 | 5.749133000  | -1.342646000 |
| 6  | 4.979891000  | 2.133509000  | -0.241399000 |
| 6  | 5.114833000  | 1.098422000  | -1.164232000 |
| 6  | 5.872650000  | 2.212626000  | 0.827531000  |
| 6  | 6.143442000  | 0.173734000  | -1.036820000 |
| 6  | 7.034813000  | 0.262822000  | 0.026298000  |
| 6  | 6.891815000  | 1.280018000  | 0.963756000  |
| 6  | 7.741281000  | 10.303857000 | -1.416331000 |
| 6  | 6.850393000  | 10.226786000 | -2.486956000 |
| 6  | 7.602401000  | 11.334624000 | -0.489359000 |
| 6  | 5.829182000  | 11.157457000 | -2.620920000 |
| 6  | 5.682176000  | 12.170349000 | -1.679412000 |
| 6  | 6.571624000  | 12.257251000 | -0.614520000 |
| 1  | 5.765949000  | 3.008949000  | 1.552832000  |
| 1  | 4.407015000  | 1.024967000  | -1.978752000 |
| 1  | 6.960038000  | 9.433473000  | -3.215126000 |
| 1  | 8.308699000  | 11.406412000 | 0.326632000  |
| 1  | 7.573684000  | 1.346922000  | 1.801514000  |
| 1  | 6.246553000  | -0.619720000 | -1.765628000 |

|   |              |              |              |
|---|--------------|--------------|--------------|
| 1 | 6.465313000  | 13.047346000 | 0.117466000  |
| 1 | 5.148661000  | 11.092316000 | -3.459908000 |
| 1 | 7.833485000  | -0.460374000 | 0.127731000  |
| 1 | 4.881749000  | 12.891853000 | -1.779001000 |
| 6 | -2.042205000 | 5.871922000  | -0.273316000 |
| 6 | -2.890534000 | 5.536555000  | -1.514266000 |
| 1 | -3.817444000 | 6.113635000  | -1.503375000 |
| 1 | -3.155659000 | 4.479904000  | -1.550266000 |
| 1 | -2.348193000 | 5.777767000  | -2.429966000 |
| 6 | -1.769086000 | 7.379748000  | -0.270920000 |
| 1 | -1.192388000 | 7.684557000  | 0.603860000  |
| 1 | -2.715629000 | 7.921602000  | -0.248522000 |
| 1 | -1.228914000 | 7.693758000  | -1.165568000 |
| 6 | -2.835937000 | 5.522201000  | 0.999581000  |
| 1 | -3.101277000 | 4.465491000  | 1.033135000  |
| 1 | -3.761164000 | 6.100853000  | 1.037214000  |
| 1 | -2.253043000 | 5.750427000  | 1.893380000  |
| 6 | 14.723313000 | 6.499534000  | -1.396255000 |
| 6 | 14.680704000 | 5.616653000  | -2.657261000 |
| 1 | 13.797606000 | 4.977853000  | -2.671451000 |
| 1 | 15.561766000 | 4.972704000  | -2.697180000 |
| 1 | 14.664677000 | 6.230437000  | -3.559388000 |
| 6 | 14.737287000 | 5.602279000  | -0.144660000 |
| 1 | 13.855496000 | 4.963190000  | -0.098281000 |
| 1 | 14.761814000 | 6.205797000  | 0.764187000  |
| 1 | 15.619122000 | 4.958163000  | -0.151640000 |
| 6 | 16.025707000 | 7.307932000  | -1.421103000 |
| 1 | 16.088952000 | 7.947343000  | -2.303037000 |
| 1 | 16.876242000 | 6.625244000  | -1.446199000 |
| 1 | 16.130983000 | 7.934377000  | -0.533888000 |

**9bb**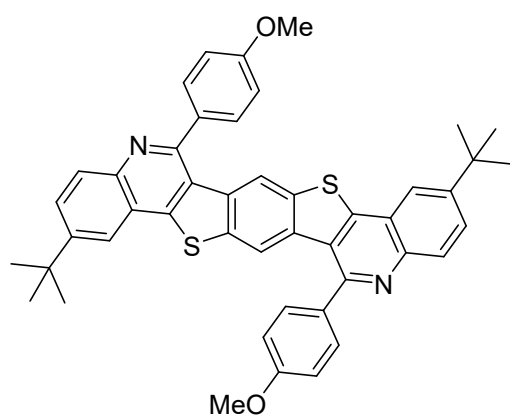

xyz

0 1

|    |              |             |              |
|----|--------------|-------------|--------------|
| 6  | -0.811638000 | 5.152193000 | -0.332800000 |
| 6  | -0.915414000 | 3.730658000 | -0.383661000 |
| 6  | 0.457537000  | 5.704862000 | -0.318397000 |
| 6  | 0.196321000  | 2.918693000 | -0.411205000 |
| 6  | 1.502942000  | 3.473390000 | -0.391580000 |
| 6  | 1.621513000  | 4.895708000 | -0.353705000 |
| 7  | 2.578409000  | 2.641138000 | -0.376825000 |
| 6  | 3.803346000  | 3.128074000 | -0.361136000 |
| 6  | 4.058677000  | 4.543255000 | -0.450050000 |
| 6  | 2.947967000  | 5.399435000 | -0.396907000 |
| 1  | 0.589546000  | 6.786182000 | -0.287816000 |
| 1  | -1.903944000 | 3.267526000 | -0.397199000 |
| 1  | 0.111830000  | 1.830987000 | -0.440127000 |
| 6  | 5.302189000  | 5.285518000 | -0.640958000 |
| 6  | 5.074506000  | 6.694071000 | -0.641265000 |
| 16 | 3.370401000  | 7.097649000 | -0.459742000 |
| 6  | 6.613708000  | 4.834835000 | -0.857304000 |
| 6  | 6.086385000  | 7.632723000 | -0.815591000 |
| 6  | 7.625544000  | 5.773495000 | -1.032430000 |
| 6  | 7.398054000  | 7.182089000 | -1.031925000 |
| 1  | 5.856592000  | 8.695080000 | -0.790788000 |

|    |              |              |              |
|----|--------------|--------------|--------------|
| 1  | 6.843322000  | 3.772468000  | -0.882674000 |
| 16 | 9.329090000  | 5.370384000  | -1.218113000 |
| 6  | 9.750460000  | 7.068267000  | -1.283875000 |
| 6  | 8.641215000  | 7.923944000  | -1.225069000 |
| 6  | 8.896163000  | 9.341055000  | -1.312650000 |
| 6  | 11.078227000 | 7.572603000  | -1.334058000 |
| 6  | 11.197287000 | 8.996868000  | -1.294901000 |
| 7  | 10.119499000 | 9.828752000  | -1.302400000 |
| 6  | 12.500882000 | 9.549681000  | -1.282854000 |
| 6  | 12.240871000 | 6.770331000  | -1.377673000 |
| 6  | 13.514690000 | 7.322597000  | -1.371566000 |
| 6  | 13.618728000 | 8.739305000  | -1.319176000 |
| 1  | 14.601192000 | 9.209754000  | -1.311375000 |
| 1  | 12.585744000 | 10.637380000 | -1.253182000 |
| 1  | 12.116354000 | 5.685653000  | -1.408878000 |
| 6  | 4.892926000  | 2.127627000  | -0.209905000 |
| 6  | 4.899635000  | 0.968833000  | -0.994424000 |
| 6  | 5.883488000  | 2.267045000  | 0.779510000  |
| 6  | 5.883176000  | -0.010393000 | -0.837961000 |
| 6  | 6.874982000  | 0.150271000  | 0.141847000  |
| 6  | 6.860213000  | 1.295845000  | 0.956846000  |
| 6  | 7.803923000  | 10.339947000 | -1.455295000 |
| 6  | 6.807210000  | 10.200118000 | -2.438435000 |
| 6  | 7.799478000  | 11.496880000 | -0.668056000 |
| 6  | 5.827234000  | 11.169518000 | -2.607520000 |
| 6  | 5.815116000  | 12.313364000 | -1.790048000 |
| 6  | 6.812751000  | 12.474197000 | -0.816192000 |
| 1  | 5.880074000  | 3.147794000  | 1.425006000  |
| 1  | 4.113295000  | 0.835466000  | -1.739361000 |
| 1  | 6.808021000  | 9.320340000  | -3.085299000 |
| 1  | 8.590081000  | 11.630309000 | 0.072352000  |
| 1  | 7.626411000  | 1.393217000  | 1.727909000  |

|   |              |              |              |
|---|--------------|--------------|--------------|
| 1 | 5.863704000  | -0.892049000 | -1.477847000 |
| 1 | 6.834185000  | 13.354450000 | -0.174440000 |
| 1 | 5.056125000  | 11.071866000 | -3.373631000 |
| 6 | -2.090321000 | 5.999276000  | -0.299265000 |
| 6 | -2.921748000 | 5.713648000  | -1.568020000 |
| 1 | -3.847948000 | 6.310643000  | -1.561459000 |
| 1 | -3.208030000 | 4.653929000  | -1.641233000 |
| 1 | -2.352986000 | 5.971883000  | -2.474834000 |
| 6 | -1.786832000 | 7.504127000  | -0.248447000 |
| 1 | -1.212902000 | 7.774771000  | 0.651050000  |
| 1 | -2.728826000 | 8.073208000  | -0.225431000 |
| 1 | -1.219304000 | 7.836273000  | -1.131248000 |
| 6 | -2.912974000 | 5.626365000  | 0.952433000  |
| 1 | -3.197768000 | 4.563717000  | 0.954663000  |
| 1 | -3.839712000 | 6.221216000  | 0.993196000  |
| 1 | -2.338348000 | 5.822391000  | 1.871043000  |
| 6 | 14.746482000 | 6.403459000  | -1.417083000 |
| 6 | 14.700174000 | 5.554057000  | -2.704818000 |
| 1 | 13.798644000 | 4.924906000  | -2.746101000 |
| 1 | 15.576912000 | 4.888462000  | -2.757884000 |
| 1 | 14.702310000 | 6.196704000  | -3.598966000 |
| 6 | 14.732022000 | 5.473002000  | -0.185756000 |
| 1 | 13.830976000 | 4.842233000  | -0.161894000 |
| 1 | 14.757747000 | 6.056964000  | 0.747431000  |
| 1 | 15.609046000 | 4.805769000  | -0.197914000 |
| 6 | 16.063554000 | 7.194938000  | -1.408446000 |
| 1 | 16.145515000 | 7.863163000  | -2.279416000 |
| 1 | 16.914906000 | 6.497972000  | -1.443647000 |
| 1 | 16.170320000 | 7.802847000  | -0.496933000 |
| 8 | 7.870543000  | -0.738328000 | 0.377468000  |
| 6 | 7.935529000  | -1.914405000 | -0.395449000 |
| 1 | 7.030725000  | -2.536528000 | -0.273143000 |

|   |             |              |              |
|---|-------------|--------------|--------------|
| 1 | 8.806848000 | -2.478236000 | -0.037043000 |
| 1 | 8.069011000 | -1.692901000 | -1.469712000 |
| 8 | 4.815917000 | 13.200047000 | -2.017254000 |
| 6 | 4.752610000 | 14.373893000 | -1.240805000 |
| 1 | 4.626517000 | 14.149151000 | -0.166323000 |
| 1 | 3.877504000 | 14.936272000 | -1.592197000 |
| 1 | 5.654912000 | 14.998835000 | -1.367156000 |

**9bc**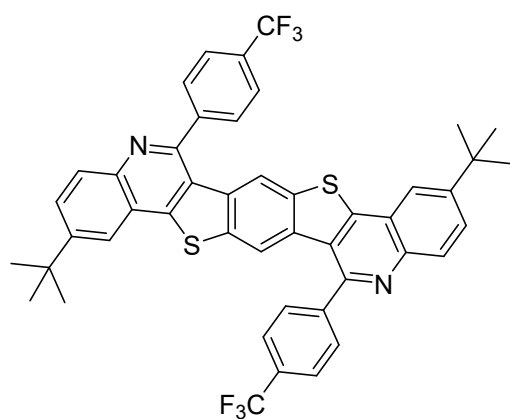

xyz

0 1

|    |              |             |              |
|----|--------------|-------------|--------------|
| 6  | -0.781282000 | 5.035081000 | -0.301791000 |
| 6  | -0.866199000 | 3.612815000 | -0.373842000 |
| 6  | 0.479902000  | 5.606176000 | -0.299392000 |
| 6  | 0.255764000  | 2.816898000 | -0.434213000 |
| 6  | 1.553666000  | 3.391260000 | -0.428664000 |
| 6  | 1.654339000  | 4.814352000 | -0.367279000 |
| 7  | 2.642003000  | 2.575161000 | -0.455429000 |
| 6  | 3.856674000  | 3.082925000 | -0.450160000 |
| 6  | 4.095693000  | 4.500207000 | -0.499963000 |
| 6  | 2.972447000  | 5.338788000 | -0.416992000 |
| 1  | 0.596042000  | 6.688657000 | -0.252159000 |
| 1  | -1.848347000 | 3.136435000 | -0.377910000 |
| 1  | 0.185659000  | 1.728851000 | -0.480610000 |
| 6  | 5.328824000  | 5.264074000 | -0.669925000 |
| 6  | 5.079218000  | 6.668673000 | -0.633795000 |
| 16 | 3.370354000  | 7.043007000 | -0.439398000 |
| 6  | 6.647685000  | 4.837850000 | -0.890800000 |
| 6  | 6.078425000  | 7.625460000 | -0.781337000 |
| 6  | 7.647263000  | 5.794766000 | -1.037178000 |
| 6  | 7.397152000  | 7.199199000 | -1.003037000 |
| 1  | 5.832068000  | 8.683022000 | -0.727851000 |



|    |              |              |              |
|----|--------------|--------------|--------------|
| 1  | 6.894276000  | 3.780325000  | -0.943465000 |
| 16 | 9.357087000  | 5.422329000  | -1.227377000 |
| 6  | 9.752775000  | 7.126738000  | -1.251996000 |
| 6  | 8.629441000  | 7.963289000  | -1.174270000 |
| 6  | 8.865413000  | 9.382624000  | -1.229703000 |
| 6  | 11.071711000 | 7.654303000  | -1.298349000 |
| 6  | 11.169477000 | 9.079789000  | -1.237883000 |
| 7  | 10.077309000 | 9.893568000  | -1.219310000 |
| 6  | 12.463028000 | 9.654899000  | -1.227829000 |
| 6  | 12.246798000 | 6.871735000  | -1.361622000 |
| 6  | 13.511392000 | 7.445234000  | -1.355909000 |
| 6  | 13.593098000 | 8.862879000  | -1.283947000 |
| 1  | 14.568105000 | 9.348375000  | -1.276330000 |
| 1  | 12.530950000 | 10.743174000 | -1.182439000 |
| 1  | 12.140538000 | 5.785776000  | -1.408453000 |
| 6  | 4.960023000  | 2.085432000  | -0.349465000 |
| 6  | 4.986749000  | 0.982914000  | -1.218004000 |
| 6  | 5.934476000  | 2.184917000  | 0.653706000  |
| 6  | 5.988453000  | 0.022381000  | -1.110552000 |
| 6  | 6.966894000  | 0.139950000  | -0.114520000 |
| 6  | 6.932909000  | 1.217641000  | 0.774143000  |
| 6  | 7.758479000  | 10.373748000 | -1.349137000 |
| 6  | 6.792950000  | 10.256789000 | -2.358995000 |
| 6  | 7.719510000  | 11.487257000 | -0.495077000 |
| 6  | 5.790889000  | 11.217367000 | -2.500051000 |
| 6  | 5.744176000  | 12.305788000 | -1.625439000 |
| 6  | 6.714228000  | 12.441430000 | -0.623339000 |
| 1  | 5.908864000  | 3.025782000  | 1.349444000  |
| 1  | 4.208677000  | 0.891165000  | -1.977145000 |
| 1  | 6.828997000  | 9.408001000  | -3.044556000 |
| 1  | 8.491938000  | 11.593099000 | 0.267990000  |
| 1  | 7.686173000  | 1.298977000  | 1.558430000  |

|   |              |              |              |
|---|--------------|--------------|--------------|
| 1 | 6.013728000  | -0.823124000 | -1.800985000 |
| 1 | 6.681671000  | 13.297743000 | 0.053442000  |
| 1 | 5.045865000  | 11.123591000 | -3.290690000 |
| 6 | -2.070735000 | 5.863073000  | -0.233342000 |
| 6 | -2.918891000 | 5.584482000  | -1.492753000 |
| 1 | -3.852408000 | 6.168891000  | -1.461167000 |
| 1 | -3.192775000 | 4.522297000  | -1.577350000 |
| 1 | -2.369288000 | 5.864481000  | -2.404932000 |
| 6 | -1.787417000 | 7.371171000  | -0.163923000 |
| 1 | -1.203022000 | 7.636611000  | 0.730418000  |
| 1 | -2.736853000 | 7.925952000  | -0.116564000 |
| 1 | -1.239945000 | 7.725411000  | -1.050853000 |
| 6 | -2.866068000 | 5.458099000  | 1.026214000  |
| 1 | -3.136660000 | 4.391745000  | 1.016122000  |
| 1 | -3.799773000 | 6.039442000  | 1.091630000  |
| 1 | -2.278936000 | 5.648048000  | 1.938182000  |
| 6 | 14.757720000 | 6.547601000  | -1.421760000 |
| 6 | 14.714363000 | 5.711937000  | -2.718707000 |
| 1 | 13.824051000 | 5.066943000  | -2.759618000 |
| 1 | 15.602055000 | 5.062609000  | -2.785841000 |
| 1 | 14.698310000 | 6.364166000  | -3.605774000 |
| 6 | 14.767298000 | 5.603916000  | -0.200253000 |
| 1 | 13.877543000 | 4.957208000  | -0.177209000 |
| 1 | 14.790305000 | 6.177988000  | 0.739154000  |
| 1 | 15.655368000 | 4.952117000  | -0.226328000 |
| 6 | 16.061411000 | 7.361023000  | -1.414599000 |
| 1 | 16.125141000 | 8.040690000  | -2.278266000 |
| 1 | 16.923395000 | 6.678412000  | -1.465516000 |
| 1 | 16.166627000 | 7.959253000  | -0.496479000 |
| 6 | 8.029244000  | -0.922422000 | -0.007700000 |
| 9 | 7.507845000  | -2.107639000 | 0.361946000  |
| 6 | 4.666943000  | 13.351899000 | -1.741917000 |

|   |             |              |              |
|---|-------------|--------------|--------------|
| 9 | 5.187102000 | 14.573302000 | -1.965309000 |
| 9 | 3.808740000 | 13.092304000 | -2.742112000 |
| 9 | 3.945451000 | 13.442074000 | -0.607605000 |
| 9 | 8.978149000 | -0.606950000 | 0.889484000  |
| 9 | 8.643158000 | -1.123319000 | -1.189622000 |

**9bd**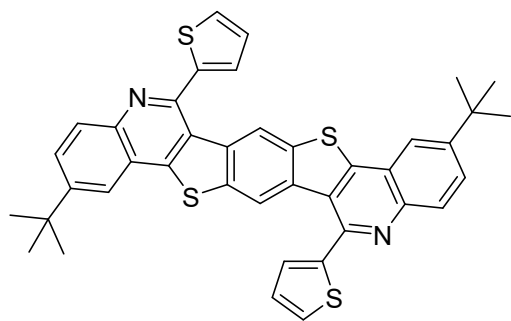

xyz

0 1

|    |              |             |              |
|----|--------------|-------------|--------------|
| 6  | -0.552835000 | 5.063688000 | 0.241480000  |
| 6  | -0.594822000 | 3.644462000 | 0.379458000  |
| 6  | 0.646410000  | 5.638304000 | -0.144459000 |
| 6  | 0.505715000  | 2.854354000 | 0.134255000  |
| 6  | 1.738686000  | 3.432159000 | -0.268530000 |
| 6  | 1.799775000  | 4.853129000 | -0.395636000 |
| 7  | 2.791150000  | 2.622799000 | -0.551051000 |
| 6  | 3.952589000  | 3.130313000 | -0.920884000 |
| 6  | 4.187888000  | 4.552702000 | -0.941290000 |
| 6  | 3.074119000  | 5.381543000 | -0.731244000 |
| 1  | 0.731325000  | 6.719203000 | -0.253910000 |
| 1  | -1.527083000 | 3.165238000 | 0.684347000  |
| 1  | 0.465831000  | 1.768089000 | 0.230886000  |
| 6  | 5.413773000  | 5.330747000 | -1.100312000 |
| 6  | 5.145445000  | 6.732511000 | -1.106760000 |
| 16 | 3.441172000  | 7.089264000 | -0.850961000 |
| 6  | 6.756661000  | 4.924792000 | -1.141725000 |
| 6  | 6.135545000  | 7.699338000 | -1.247827000 |
| 6  | 7.748506000  | 5.892833000 | -1.261504000 |
| 6  | 7.472423000  | 7.289012000 | -1.368528000 |
| 1  | 5.877316000  | 8.755709000 | -1.235408000 |
| 1  | 7.022671000  | 3.874035000 | -1.052998000 |
| 16 | 9.474847000  | 5.552741000 | -1.232526000 |

|   |              |              |              |
|---|--------------|--------------|--------------|
| 6 | 9.840289000  | 7.259765000  | -1.360702000 |
| 6 | 8.701354000  | 8.069042000  | -1.486696000 |
| 6 | 8.924139000  | 9.484800000  | -1.660438000 |
| 6 | 11.147794000 | 7.812378000  | -1.284865000 |
| 6 | 11.214846000 | 9.240207000  | -1.324795000 |
| 7 | 10.122147000 | 10.021406000 | -1.530795000 |
| 6 | 12.486630000 | 9.847007000  | -1.181864000 |
| 6 | 12.331816000 | 7.057242000  | -1.129517000 |
| 6 | 13.575343000 | 7.661062000  | -0.996707000 |
| 6 | 13.625136000 | 9.081700000  | -1.022636000 |
| 1 | 14.582392000 | 9.591157000  | -0.919551000 |
| 1 | 12.531224000 | 10.936992000 | -1.212361000 |
| 1 | 12.248558000 | 5.968499000  | -1.104512000 |
| 6 | 4.960307000  | 2.145364000  | -1.346443000 |
| 6 | 7.853251000  | 10.422404000 | -2.035366000 |
| 6 | -1.817377000 | 5.884516000  | 0.525119000  |
| 6 | -2.939091000 | 5.435574000  | -0.435654000 |
| 1 | -3.859358000 | 6.010832000  | -0.244804000 |
| 1 | -3.180809000 | 4.369122000  | -0.314732000 |
| 1 | -2.644469000 | 5.597007000  | -1.484284000 |
| 6 | -1.586002000 | 7.390350000  | 0.329585000  |
| 1 | -0.809244000 | 7.775719000  | 1.007791000  |
| 1 | -1.289051000 | 7.627116000  | -0.703660000 |
| 1 | -2.515429000 | 7.940344000  | 0.542434000  |
| 6 | -2.260531000 | 5.645847000  | 1.984417000  |
| 1 | -2.483394000 | 4.586011000  | 2.177855000  |
| 1 | -3.171123000 | 6.224935000  | 2.207304000  |
| 1 | -1.473912000 | 5.958347000  | 2.688705000  |
| 6 | 14.831993000 | 6.792372000  | -0.823480000 |
| 6 | 14.980464000 | 5.862667000  | -2.046405000 |
| 1 | 14.113301000 | 5.195136000  | -2.159575000 |
| 1 | 15.878056000 | 5.231885000  | -1.942284000 |

|    |              |              |              |
|----|--------------|--------------|--------------|
| 1  | 15.077593000 | 6.447434000  | -2.974386000 |
| 6  | 14.688077000 | 5.941778000  | 0.456461000  |
| 1  | 13.812804000 | 5.276948000  | 0.408244000  |
| 1  | 14.573284000 | 6.584101000  | 1.343442000  |
| 1  | 15.580709000 | 5.312027000  | 0.601578000  |
| 6  | 16.110270000 | 7.636379000  | -0.701215000 |
| 1  | 16.281979000 | 8.252008000  | -1.597543000 |
| 1  | 16.981306000 | 6.973991000  | -0.581831000 |
| 1  | 16.078991000 | 8.303429000  | 0.173937000  |
| 6  | 5.850288000  | 2.187757000  | -2.401784000 |
| 16 | 5.007625000  | 0.590674000  | -0.558367000 |
| 6  | 6.589000000  | 0.980158000  | -2.557480000 |
| 6  | 6.248424000  | 0.033270000  | -1.620215000 |
| 16 | 7.914485000  | 12.058616000 | -1.435914000 |
| 6  | 6.519494000  | 12.499910000 | -2.350825000 |
| 6  | 6.811039000  | 10.265492000 | -2.928098000 |
| 6  | 6.046464000  | 11.453500000 | -3.107361000 |
| 1  | 5.186447000  | 11.530603000 | -3.773863000 |
| 1  | 6.123188000  | 13.512454000 | -2.289338000 |
| 1  | 6.619645000  | 9.332039000  | -3.456670000 |
| 1  | 5.948833000  | 3.051556000  | -3.058674000 |
| 1  | 7.336209000  | 0.818176000  | -3.335455000 |
| 1  | 6.658675000  | -0.968786000 | -1.503343000 |

**9be**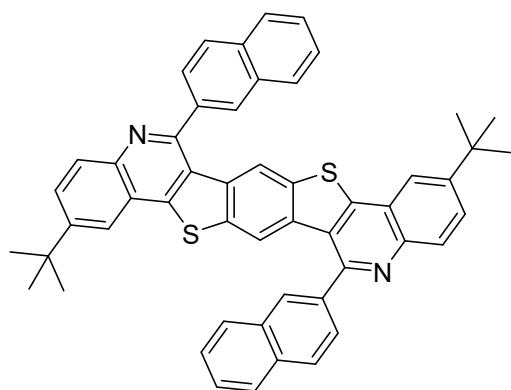

xyz

0 1

|    |              |             |              |
|----|--------------|-------------|--------------|
| 6  | -0.722793000 | 4.834712000 | -0.143517000 |
| 6  | -0.772255000 | 3.421652000 | -0.266494000 |
| 6  | 0.514461000  | 5.435549000 | -0.154714000 |
| 6  | 0.361245000  | 2.663659000 | -0.387253000 |
| 6  | 1.636110000  | 3.269843000 | -0.395553000 |
| 6  | 1.701856000  | 4.683022000 | -0.284124000 |
| 7  | 2.741340000  | 2.482659000 | -0.480664000 |
| 6  | 3.937779000  | 3.024588000 | -0.488232000 |
| 6  | 4.132807000  | 4.442952000 | -0.492232000 |
| 6  | 2.997445000  | 5.242829000 | -0.349469000 |
| 1  | 0.600715000  | 6.509194000 | -0.070266000 |
| 1  | -1.732356000 | 2.923727000 | -0.261391000 |
| 1  | 0.314320000  | 1.586300000 | -0.471287000 |
| 6  | 5.336718000  | 5.242952000 | -0.664281000 |
| 6  | 5.053429000  | 6.630979000 | -0.569136000 |
| 16 | 3.349766000  | 6.947021000 | -0.320491000 |
| 6  | 6.652884000  | 4.865285000 | -0.934880000 |
| 6  | 6.016665000  | 7.615282000 | -0.702940000 |
| 6  | 7.616074000  | 5.849582000 | -1.069065000 |
| 6  | 7.333076000  | 7.237716000 | -0.973496000 |
| 1  | 5.745656000  | 8.653688000 | -0.608181000 |
| 1  | 6.923627000  | 3.826769000 | -1.029488000 |

|    |              |              |              |
|----|--------------|--------------|--------------|
| 16 | 9.319396000  | 5.533980000  | -1.318471000 |
| 6  | 9.670992000  | 7.237722000  | -1.290185000 |
| 6  | 8.537194000  | 8.037123000  | -1.145908000 |
| 6  | 8.732715000  | 9.457551000  | -1.148197000 |
| 6  | 10.968486000 | 7.797816000  | -1.356236000 |
| 6  | 11.034971000 | 9.212935000  | -1.241884000 |
| 7  | 9.927424000  | 9.999735000  | -1.154986000 |
| 6  | 12.306492000 | 9.816674000  | -1.250451000 |
| 6  | 12.153247000 | 7.051772000  | -1.487933000 |
| 6  | 13.395664000 | 7.652041000  | -1.500088000 |
| 6  | 13.446008000 | 9.059505000  | -1.374568000 |
| 1  | 14.400878000 | 9.563079000  | -1.379089000 |
| 1  | 12.354483000 | 10.893871000 | -1.164714000 |
| 1  | 12.072642000 | 5.975808000  | -1.575116000 |
| 6  | 5.070558000  | 2.066158000  | -0.455004000 |
| 6  | 5.121020000  | 1.006028000  | -1.391878000 |
| 6  | 6.042759000  | 2.158532000  | 0.511546000  |
| 6  | 6.147333000  | 0.101836000  | -1.366900000 |
| 6  | 7.173155000  | 0.189086000  | -0.395242000 |
| 6  | 7.111686000  | 1.237526000  | 0.570417000  |
| 6  | 7.598827000  | 10.414789000 | -1.180811000 |
| 6  | 6.627150000  | 10.322697000 | -2.147878000 |
| 6  | 7.547391000  | 11.473971000 | -0.242905000 |
| 6  | 5.557926000  | 11.243408000 | -2.206526000 |
| 6  | 5.495466000  | 12.290896000 | -1.239906000 |
| 6  | 6.520647000  | 12.377657000 | -0.267518000 |
| 6  | -2.026913000 | 5.620134000  | -0.008820000 |
| 6  | -2.901373000 | 5.368474000  | -1.251622000 |
| 1  | -3.840276000 | 5.919740000  | -1.168851000 |
| 1  | -3.143574000 | 4.312208000  | -1.369142000 |
| 1  | -2.389724000 | 5.698357000  | -2.157263000 |
| 6  | -1.787858000 | 7.128928000  | 0.113246000  |



|   |              |              |              |
|---|--------------|--------------|--------------|
| 1 | -1.192612000 | 7.373766000  | 0.994407000  |
| 1 | -2.745314000 | 7.643198000  | 0.207362000  |
| 1 | -1.281474000 | 7.530452000  | -0.766010000 |
| 6 | -2.777509000 | 5.146617000  | 1.250138000  |
| 1 | -3.016087000 | 4.084034000  | 1.203737000  |
| 1 | -3.715218000 | 5.695643000  | 1.357600000  |
| 1 | -2.176977000 | 5.317024000  | 2.145152000  |
| 6 | 14.656139000 | 6.793480000  | -1.645443000 |
| 6 | 14.597231000 | 6.026853000  | -2.979822000 |
| 1 | 13.727862000 | 5.371108000  | -3.028410000 |
| 1 | 15.490438000 | 5.410378000  | -3.101126000 |
| 1 | 14.542374000 | 6.718826000  | -3.821832000 |
| 6 | 14.725005000 | 5.787972000  | -0.481017000 |
| 1 | 13.859804000 | 5.125134000  | -0.469836000 |
| 1 | 14.761463000 | 6.307819000  | 0.477781000  |
| 1 | 15.620608000 | 5.169372000  | -0.569088000 |
| 6 | 15.939232000 | 7.632387000  | -1.630389000 |
| 1 | 15.966112000 | 8.346891000  | -2.454652000 |
| 1 | 16.803729000 | 6.975219000  | -1.734649000 |
| 1 | 16.052945000 | 8.182254000  | -0.694745000 |
| 1 | 6.002856000  | 2.956120000  | 1.243075000  |
| 1 | 6.185906000  | -0.698930000 | -2.095272000 |
| 1 | 4.330840000  | 0.926977000  | -2.125491000 |
| 1 | 6.667683000  | 9.525777000  | -2.880104000 |
| 1 | 6.481262000  | 13.177688000 | 0.461615000  |
| 1 | 8.337221000  | 11.552656000 | 0.491116000  |
| 6 | 8.131286000  | 1.329963000  | 1.547986000  |
| 6 | 8.252448000  | -0.723439000 | -0.344002000 |
| 6 | 9.225628000  | -0.606427000 | 0.614102000  |
| 6 | 9.164924000  | 0.430948000  | 1.569074000  |
| 1 | 8.297308000  | -1.519406000 | -1.077303000 |
| 1 | 10.046482000 | -1.311165000 | 0.642371000  |

|   |             |              |              |
|---|-------------|--------------|--------------|
| 1 | 8.081803000 | 2.128389000  | 2.278189000  |
| 1 | 9.940395000 | 0.513090000  | 2.319436000  |
| 6 | 4.538978000 | 11.151538000 | -3.184813000 |
| 6 | 4.415863000 | 13.203061000 | -1.290915000 |
| 6 | 3.505051000 | 12.050219000 | -3.205693000 |
| 6 | 3.443348000 | 13.086639000 | -2.249757000 |
| 1 | 2.622243000 | 13.791088000 | -2.277866000 |
| 1 | 4.370252000 | 13.998280000 | -0.556851000 |
| 1 | 4.589208000 | 10.353802000 | -3.915717000 |
| 1 | 2.730052000 | 11.968586000 | -3.956598000 |

**9bf**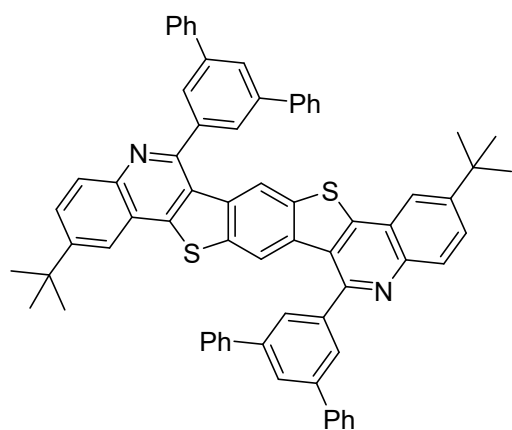

xyz

0 1

|   |          |         |          |
|---|----------|---------|----------|
| C | -0.16237 | 4.34784 | 0.54212  |
| C | -0.17565 | 2.93803 | 0.41346  |
| C | 1.07659  | 5.01149 | 0.38422  |
| C | 0.99609  | 2.22820 | 0.14123  |
| C | 2.20820  | 2.90010 | -0.01194 |
| C | 2.25509  | 4.29623 | 0.10912  |
| N | 3.34565  | 2.19837 | -0.25666 |
| C | 4.57789  | 2.76776 | -0.40844 |
| C | 4.66985  | 4.19661 | -0.36436 |
| C | 3.49608  | 4.91623 | -0.07242 |
| H | 1.12176  | 6.08766 | 0.47233  |
| H | -1.08172 | 2.36128 | 0.52121  |
| H | 0.95834  | 1.14918 | 0.05255  |
| C | 5.76881  | 5.08599 | -0.59620 |
| C | 5.42095  | 6.42895 | -0.39221 |
| S | 3.80567  | 6.57138 | 0.01194  |
| C | 7.08520  | 4.80732 | -1.01381 |
| C | 6.31687  | 7.49084 | -0.54018 |
| C | 7.98122  | 5.86923 | -1.16149 |
| C | 7.63321  | 7.21212 | -0.95768 |
| H | 5.95672  | 8.47099 | -0.30805 |

|   |          |          |          |
|---|----------|----------|----------|
| H | 7.44552  | 3.82728  | -1.24589 |
| S | 9.59685  | 5.72704  | -1.56464 |
| C | 9.90618  | 7.38229  | -1.48000 |
| C | 8.73205  | 8.10163  | -1.18914 |
| C | 8.82335  | 9.53047  | -1.14545 |
| C | 11.14717 | 8.00268  | -1.66025 |
| C | 11.19347 | 9.39889  | -1.53932 |
| N | 10.05550 | 10.10034 | -1.29609 |
| C | 12.40557 | 10.07113 | -1.69111 |
| C | 12.32622 | 7.28775  | -1.93378 |
| C | 13.56519 | 7.95176  | -2.09012 |
| C | 13.57787 | 9.36160  | -1.96171 |
| H | 14.48389 | 9.93861  | -2.06834 |
| H | 12.44288 | 11.15018 | -1.60255 |
| H | 12.28149 | 6.21155  | -2.02173 |
| C | 5.70971  | 1.80337  | -0.50744 |
| C | 5.54613  | 0.61344  | -1.22938 |
| C | 6.90067  | 2.01070  | 0.19428  |
| C | 6.57065  | -0.35459 | -1.31538 |
| C | 7.77540  | -0.08255 | -0.62128 |
| C | 7.96641  | 1.09145  | 0.14494  |
| C | 7.69071  | 10.49412 | -1.04878 |
| C | 6.50096  | 10.28506 | -1.75212 |
| C | 7.85219  | 11.68495 | -0.32785 |
| C | 5.43442  | 11.20345 | -1.70550 |
| C | 5.62324  | 12.37841 | -0.94024 |
| C | 6.82666  | 12.65218 | -0.24451 |
| H | 6.96012  | 2.89882  | 0.79785  |
| H | 4.59999  | 0.47557  | -1.72149 |
| H | 6.44315  | 9.39626  | -2.35483 |
| H | 8.79749  | 11.82418 | 0.16551  |
| H | 4.82027  | 13.07536 | -0.87674 |

|   |          |          |          |
|---|----------|----------|----------|
| H | 8.57766  | -0.78010 | -0.68681 |
| C | 7.00951  | 13.92960 | 0.56079  |
| C | 6.05003  | 14.97680 | 0.53065  |
| C | 8.15095  | 14.13483 | 1.38078  |
| C | 6.22633  | 16.14809 | 1.27314  |
| C | 8.31584  | 15.30978 | 2.11994  |
| C | 7.35619  | 16.31480 | 2.06660  |
| H | 7.48821  | 17.22322 | 2.64015  |
| H | 5.48061  | 16.93187 | 1.23039  |
| H | 8.93552  | 13.40642 | 1.48459  |
| H | 9.19454  | 15.43941 | 2.73906  |
| H | 5.15310  | 14.93429 | -0.06153 |
| C | 9.26310  | 1.35851  | 0.88666  |
| C | 9.55198  | 2.63614  | 1.43421  |
| C | 10.24548 | 0.34913  | 1.05937  |
| C | 11.43889 | 0.60649  | 1.74056  |
| C | 10.74965 | 2.88290  | 2.11088  |
| C | 11.69132 | 1.87041  | 2.26493  |
| H | 8.88102  | 3.47366  | 1.34468  |
| H | 10.94815 | 3.86727  | 2.51557  |
| H | 12.17145 | -0.18127 | 1.86268  |
| H | 12.61735 | 2.06545  | 2.79026  |
| H | 10.12011 | -0.65529 | 0.69246  |
| C | 4.13921  | 10.93455 | -2.44917 |
| C | 3.15642  | 11.94300 | -2.62481 |
| C | 3.85226  | 9.65606  | -2.99577 |
| C | 2.65600  | 9.40766  | -3.67434 |
| C | 1.71389  | 10.41928 | -3.83126 |
| C | 1.96443  | 11.68398 | -3.30788 |
| H | 3.28043  | 12.94793 | -2.25883 |
| H | 1.23153  | 12.47106 | -3.43226 |
| H | 4.52366  | 8.81914  | -2.90407 |

|   |          |          |          |
|---|----------|----------|----------|
| H | 2.45896  | 8.42268  | -4.07827 |
| H | 0.78896  | 10.22296 | -4.35808 |
| C | 6.38540  | -1.63100 | -2.12178 |
| C | 5.24211  | -1.83467 | -2.93959 |
| C | 7.34436  | -2.67877 | -2.09488 |
| C | 7.16582  | -3.84911 | -2.83834 |
| C | 5.07499  | -3.00868 | -3.67974 |
| C | 6.03419  | -4.01429 | -3.62959 |
| H | 5.90044  | -4.92197 | -4.20389 |
| H | 7.91119  | -4.63334 | -2.79808 |
| H | 8.24258  | -2.63744 | -1.50459 |
| H | 4.45768  | -1.10577 | -3.04092 |
| H | 4.19490  | -3.13712 | -4.29712 |
| C | -1.43433 | 5.17021  | 0.84218  |
| C | -2.70122 | 4.29265  | 0.98484  |
| H | -2.90550 | 3.73395  | 0.04589  |
| H | -3.59328 | 4.92046  | 1.20006  |
| H | -2.59204 | 3.57029  | 1.82256  |
| C | -1.24819 | 5.94196  | 2.16670  |
| H | -1.07268 | 5.23405  | 3.00552  |
| H | -2.15250 | 6.54419  | 2.40206  |
| H | -0.38829 | 6.64172  | 2.11839  |
| C | -1.68482 | 6.16992  | -0.30797 |
| H | -1.82651 | 5.62764  | -1.26787 |
| H | -0.83846 | 6.87693  | -0.43141 |
| H | -2.59617 | 6.77557  | -0.11183 |
| C | 14.83784 | 7.12974  | -2.38819 |
| C | 14.65385 | 6.35761  | -3.71278 |
| H | 13.79411 | 5.65759  | -3.66552 |
| H | 15.55869 | 5.75561  | -3.94668 |
| H | 14.47933 | 7.06526  | -4.55202 |
| C | 15.08701 | 6.13039  | -1.23743 |

|   |          |         |          |
|---|----------|---------|----------|
| H | 14.24070 | 5.42313 | -1.11503 |
| H | 15.22714 | 6.67295 | -0.27746 |
| H | 15.99883 | 5.52499 | -1.43210 |
| C | 16.10466 | 8.00767 | -2.52922 |
| H | 15.99647 | 8.72981 | -3.36726 |
| H | 16.99723 | 7.38010 | -2.74299 |
| H | 16.30741 | 8.56664 | -1.59010 |

9bg

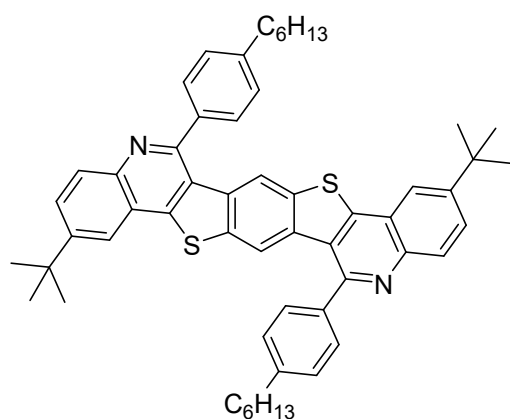

xyz

0 1

|    |              |             |              |
|----|--------------|-------------|--------------|
| 6  | -1.103735000 | 5.829269000 | -1.018365000 |
| 6  | -1.269990000 | 4.434283000 | -0.772957000 |
| 6  | 0.182668000  | 6.339845000 | -0.989185000 |
| 6  | -0.200591000 | 3.607928000 | -0.508488000 |
| 6  | 1.122679000  | 4.119472000 | -0.471497000 |
| 6  | 1.304911000  | 5.513727000 | -0.725803000 |
| 7  | 2.151434000  | 3.276529000 | -0.175866000 |
| 6  | 3.385333000  | 3.731341000 | -0.136688000 |
| 6  | 3.713714000  | 5.091023000 | -0.467974000 |
| 6  | 2.649819000  | 5.967958000 | -0.724391000 |
| 1  | 0.362278000  | 7.398382000 | -1.176561000 |
| 1  | -2.273485000 | 4.004798000 | -0.791132000 |
| 1  | -0.333325000 | 2.542314000 | -0.313818000 |
| 6  | 5.009609000  | 5.741615000 | -0.631409000 |
| 6  | 4.858219000  | 7.124736000 | -0.944526000 |
| 16 | 3.167544000  | 7.604080000 | -1.079244000 |
| 6  | 6.309730000  | 5.211321000 | -0.588203000 |
| 6  | 5.933866000  | 7.980746000 | -1.152280000 |
| 6  | 7.386489000  | 6.065593000 | -0.803140000 |
| 6  | 7.234765000  | 7.460112000 | -1.061682000 |
| 1  | 5.761146000  | 9.025275000 | -1.395419000 |



|    |              |              |              |
|----|--------------|--------------|--------------|
| 1  | 6.476473000  | 4.153254000  | -0.402983000 |
| 16 | 9.077138000  | 5.561664000  | -0.816205000 |
| 6  | 9.591669000  | 7.201098000  | -1.164233000 |
| 6  | 8.527551000  | 8.109566000  | -1.241970000 |
| 6  | 8.844841000  | 9.486559000  | -1.498126000 |
| 6  | 10.930394000 | 7.622408000  | -1.379453000 |
| 6  | 11.103690000 | 9.008789000  | -1.682326000 |
| 7  | 10.071157000 | 9.899161000  | -1.725909000 |
| 6  | 12.421509000 | 9.470729000  | -1.933831000 |
| 6  | 12.056522000 | 6.761547000  | -1.329998000 |
| 6  | 13.337526000 | 7.225434000  | -1.575847000 |
| 6  | 13.494663000 | 8.609166000  | -1.882361000 |
| 1  | 14.493551000 | 9.002128000  | -2.081366000 |
| 1  | 12.546849000 | 10.530023000 | -2.164528000 |
| 1  | 11.883673000 | 5.711356000  | -1.095709000 |
| 6  | 4.445846000  | 2.776380000  | 0.290370000  |
| 6  | 4.700321000  | 1.610596000  | -0.441675000 |
| 6  | 5.209690000  | 3.033336000  | 1.438963000  |
| 6  | 5.733237000  | 0.750721000  | -0.063309000 |
| 6  | 6.520001000  | 1.015765000  | 1.066714000  |
| 6  | 6.226675000  | 2.162021000  | 1.822594000  |
| 6  | 7.745149000  | 10.495046000 | -1.498003000 |
| 6  | 7.236158000  | 11.004312000 | -2.698351000 |
| 6  | 7.138940000  | 10.871339000 | -0.291433000 |
| 6  | 6.107313000  | 11.826018000 | -2.693239000 |
| 6  | 5.468344000  | 12.172055000 | -1.493448000 |
| 6  | 6.018881000  | 11.701366000 | -0.291411000 |
| 1  | 5.010563000  | 3.932992000  | 2.025819000  |
| 1  | 4.090396000  | 1.391442000  | -1.320363000 |
| 1  | 7.712555000  | 10.727794000 | -3.641438000 |
| 1  | 7.531857000  | 10.481834000 | 0.650611000  |
| 6  | 14.574418000 | 6.318883000  | -1.534216000 |

|   |              |              |              |
|---|--------------|--------------|--------------|
| 6 | 15.259280000 | 6.331070000  | -2.917519000 |
| 6 | -2.337134000 | 6.695492000  | -1.302339000 |
| 6 | -1.969878000 | 8.166877000  | -1.541213000 |
| 6 | 14.214376000 | 4.867818000  | -1.185375000 |
| 1 | 13.739213000 | 4.792226000  | -0.195288000 |
| 1 | 15.124850000 | 4.249830000  | -1.164237000 |
| 1 | 13.532198000 | 4.424565000  | -1.926307000 |
| 6 | 15.556247000 | 6.846934000  | -0.466690000 |
| 1 | 15.884936000 | 7.874232000  | -0.683304000 |
| 1 | 16.454473000 | 6.209993000  | -0.424733000 |
| 1 | 15.088211000 | 6.846492000  | 0.530044000  |
| 1 | 14.575735000 | 5.957563000  | -3.695808000 |
| 1 | 16.153332000 | 5.687008000  | -2.907349000 |
| 1 | 15.579202000 | 7.342777000  | -3.208144000 |
| 6 | -3.295531000 | 6.625476000  | -0.094217000 |
| 1 | -4.191834000 | 7.238693000  | -0.280988000 |
| 1 | -2.805008000 | 7.002813000  | 0.816567000  |
| 1 | -3.629977000 | 5.596641000  | 0.105682000  |
| 6 | -3.053193000 | 6.162560000  | -2.561705000 |
| 1 | -2.386622000 | 6.202596000  | -3.437249000 |
| 1 | -3.945336000 | 6.771108000  | -2.780908000 |
| 1 | -3.382111000 | 5.120153000  | -2.436983000 |
| 1 | -1.472963000 | 8.613099000  | -0.666379000 |
| 1 | -2.881095000 | 8.751251000  | -1.736501000 |
| 1 | -1.305277000 | 8.289390000  | -2.410238000 |
| 1 | 5.548626000  | 11.974428000 | 0.657371000  |
| 1 | 5.705009000  | 12.196085000 | -3.640450000 |
| 1 | 5.936036000  | -0.143842000 | -0.658699000 |
| 1 | 6.812766000  | 2.378440000  | 2.720188000  |
| 6 | 4.179077000  | 12.954377000 | -1.496237000 |
| 6 | 2.941950000  | 12.041039000 | -1.532725000 |
| 1 | 4.153620000  | 13.631597000 | -2.366486000 |

|   |              |              |              |
|---|--------------|--------------|--------------|
| 1 | 4.127854000  | 13.593894000 | -0.598768000 |
| 6 | 1.623647000  | 12.812952000 | -1.535442000 |
| 1 | 2.973865000  | 11.355520000 | -0.667122000 |
| 1 | 2.998978000  | 11.394320000 | -2.426362000 |
| 6 | 0.380613000  | 11.923330000 | -1.568104000 |
| 1 | 1.604515000  | 13.496375000 | -2.404406000 |
| 1 | 1.581362000  | 13.464582000 | -0.643220000 |
| 6 | -0.928768000 | 12.714697000 | -1.585831000 |
| 1 | 0.389847000  | 11.246429000 | -0.693654000 |
| 1 | 0.423036000  | 11.264994000 | -2.455594000 |
| 6 | -2.176156000 | 11.834184000 | -1.614371000 |
| 1 | -0.930140000 | 13.387843000 | -2.462184000 |
| 1 | -0.962393000 | 13.376339000 | -0.701396000 |
| 1 | -2.182294000 | 11.180166000 | -2.501758000 |
| 1 | -3.098109000 | 12.436577000 | -1.636351000 |
| 1 | -2.224351000 | 11.181465000 | -0.727716000 |
| 6 | 7.695601000  | 0.141783000  | 1.425582000  |
| 6 | 9.031442000  | 0.738424000  | 0.953256000  |
| 1 | 7.566666000  | -0.858477000 | 0.979613000  |
| 1 | 7.733644000  | -0.004598000 | 2.518900000  |
| 6 | 10.234203000 | -0.151615000 | 1.269185000  |
| 1 | 9.168809000  | 1.729893000  | 1.421619000  |
| 1 | 8.968289000  | 0.925987000  | -0.131774000 |
| 6 | 11.593807000 | 0.475915000  | 0.945964000  |
| 1 | 10.131404000 | -1.105977000 | 0.720156000  |
| 1 | 10.209810000 | -0.417591000 | 2.341013000  |
| 6 | 11.806938000 | 0.831391000  | -0.528159000 |
| 1 | 12.390428000 | -0.220826000 | 1.262747000  |
| 1 | 11.730378000 | 1.386581000  | 1.558680000  |
| 6 | 13.224824000 | 1.319249000  | -0.820826000 |
| 1 | 11.083955000 | 1.607568000  | -0.832951000 |
| 1 | 11.581478000 | -0.053452000 | -1.151333000 |

|   |              |             |              |
|---|--------------|-------------|--------------|
| 1 | 13.473372000 | 2.203827000 | -0.212656000 |
| 1 | 13.351375000 | 1.598183000 | -1.878762000 |
| 1 | 13.970655000 | 0.540985000 | -0.587985000 |

**9ca**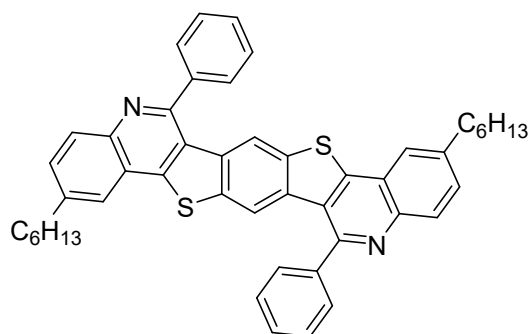

xyz

0 1

|    |              |             |              |
|----|--------------|-------------|--------------|
| 6  | -0.954744000 | 4.978363000 | -0.384819000 |
| 6  | -0.969224000 | 3.567766000 | -0.269235000 |
| 6  | 0.258462000  | 5.617085000 | -0.491603000 |
| 6  | 0.190815000  | 2.838536000 | -0.257147000 |
| 6  | 1.444355000  | 3.479183000 | -0.365209000 |
| 6  | 1.469703000  | 4.894984000 | -0.490548000 |
| 7  | 2.573782000  | 2.721195000 | -0.315376000 |
| 6  | 3.752606000  | 3.290252000 | -0.411083000 |
| 6  | 3.907272000  | 4.694551000 | -0.636693000 |
| 6  | 2.750180000  | 5.474389000 | -0.637037000 |
| 1  | 0.287314000  | 6.696762000 | -0.583594000 |
| 1  | -1.922467000 | 3.060433000 | -0.179922000 |
| 1  | 0.183756000  | 1.761804000 | -0.155059000 |
| 6  | 5.094063000  | 5.487674000 | -0.915062000 |
| 6  | 4.775363000  | 6.864454000 | -1.052922000 |
| 16 | 3.059900000  | 7.169474000 | -0.882011000 |
| 6  | 6.424080000  | 5.103137000 | -1.092007000 |
| 6  | 5.718319000  | 7.838804000 | -1.328689000 |
| 6  | 7.367167000  | 6.077524000 | -1.368030000 |
| 6  | 7.048372000  | 7.454330000 | -1.505602000 |
| 1  | 5.423028000  | 8.871782000 | -1.412650000 |
| 1  | 6.719239000  | 4.070114000 | -1.007941000 |

|    |              |              |              |
|----|--------------|--------------|--------------|
| 16 | 9.082628000  | 5.773627000  | -1.539840000 |
| 6  | 9.391366000  | 7.468681000  | -1.785044000 |
| 6  | 8.234746000  | 8.247494000  | -1.784035000 |
| 6  | 8.387559000  | 9.653721000  | -2.008163000 |
| 6  | 10.672737000 | 8.049858000  | -1.932906000 |
| 6  | 10.695684000 | 9.466940000  | -2.056181000 |
| 7  | 9.564259000  | 10.224453000 | -2.103454000 |
| 6  | 11.946693000 | 10.104570000 | -2.161826000 |
| 6  | 11.882559000 | 7.332324000  | -1.934054000 |
| 6  | 13.101144000 | 7.968725000  | -2.042097000 |
| 6  | 13.111746000 | 9.376931000  | -2.153734000 |
| 1  | 14.054645000 | 9.897733000  | -2.239334000 |
| 1  | 11.956145000 | 11.181986000 | -2.256744000 |
| 1  | 11.853091000 | 6.252123000  | -1.842136000 |
| 6  | 4.920396000  | 2.387794000  | -0.236818000 |
| 6  | 5.088421000  | 1.285205000  | -1.071902000 |
| 6  | 5.832708000  | 2.604086000  | 0.796062000  |
| 6  | 6.167528000  | 0.428583000  | -0.895422000 |
| 6  | 7.077924000  | 0.654396000  | 0.130701000  |
| 6  | 6.903095000  | 1.740013000  | 0.982164000  |
| 6  | 7.217460000  | 10.553675000 | -2.180621000 |
| 6  | 6.305494000  | 10.336722000 | -3.213668000 |
| 6  | 7.046388000  | 11.653985000 | -1.343199000 |
| 6  | 5.232594000  | 11.198091000 | -3.397830000 |
| 6  | 5.054816000  | 12.281489000 | -2.544144000 |
| 6  | 5.964760000  | 12.507849000 | -1.517744000 |
| 6  | 14.371344000 | 7.144877000  | -2.032945000 |
| 6  | -2.248003000 | 5.744221000  | -0.436674000 |
| 6  | -2.910071000 | 5.679133000  | -1.821006000 |
| 1  | -2.061401000 | 6.783979000  | -0.164363000 |
| 1  | -2.943488000 | 5.342277000  | 0.306909000  |
| 6  | -4.257702000 | 6.397225000  | -1.899891000 |

|   |              |              |              |
|---|--------------|--------------|--------------|
| 1 | -3.043119000 | 4.629255000  | -2.095948000 |
| 1 | -2.222759000 | 6.102668000  | -2.560195000 |
| 6 | -4.180851000 | 7.910433000  | -1.705589000 |
| 1 | -4.939528000 | 5.970604000  | -1.155568000 |
| 1 | -4.707016000 | 6.190824000  | -2.876361000 |
| 6 | -5.526381000 | 8.609672000  | -1.883981000 |
| 1 | -3.459511000 | 8.327945000  | -2.417678000 |
| 1 | -3.792853000 | 8.141781000  | -0.708986000 |
| 6 | -5.445510000 | 10.120539000 | -1.686065000 |
| 1 | -6.247656000 | 8.185495000  | -1.177868000 |
| 1 | -5.915533000 | 8.390742000  | -2.883577000 |
| 1 | -5.089817000 | 10.366716000 | -0.682670000 |
| 1 | -6.419547000 | 10.594602000 | -1.819181000 |
| 1 | -4.754251000 | 10.573502000 | -2.400833000 |
| 6 | 15.682696000 | 7.905295000  | -2.197513000 |
| 1 | 14.298391000 | 6.392290000  | -2.824966000 |
| 1 | 14.407585000 | 6.578875000  | -1.095975000 |
| 6 | 16.897719000 | 6.981653000  | -2.186125000 |
| 1 | 15.786882000 | 8.643264000  | -1.395999000 |
| 1 | 15.669011000 | 8.468709000  | -3.135814000 |
| 6 | 18.221843000 | 7.723277000  | -2.344616000 |
| 1 | 16.798452000 | 6.242544000  | -2.988756000 |
| 1 | 16.911499000 | 6.412611000  | -1.249957000 |
| 6 | 19.440041000 | 6.803191000  | -2.335004000 |
| 1 | 18.321454000 | 8.462037000  | -1.541420000 |
| 1 | 18.207842000 | 8.293447000  | -3.280302000 |
| 6 | 20.758678000 | 7.554783000  | -2.492681000 |
| 1 | 19.339829000 | 6.066172000  | -3.138396000 |
| 1 | 19.452457000 | 6.233424000  | -1.400173000 |
| 1 | 20.785247000 | 8.107624000  | -3.434765000 |
| 1 | 21.611448000 | 6.873712000  | -2.482503000 |
| 1 | 20.898692000 | 8.275818000  | -1.683750000 |

|   |             |              |              |
|---|-------------|--------------|--------------|
| 1 | 5.700903000 | 3.453448000  | 1.453937000  |
| 1 | 7.600139000 | 1.913610000  | 1.791637000  |
| 1 | 7.916216000 | -0.015580000 | 0.270561000  |
| 1 | 6.295268000 | -0.418530000 | -1.556826000 |
| 1 | 4.366640000 | 1.105464000  | -1.857145000 |
| 1 | 6.439367000 | 9.488815000  | -3.873013000 |
| 1 | 4.535794000 | 11.024031000 | -4.207417000 |
| 1 | 4.214497000 | 12.949257000 | -2.682394000 |
| 1 | 5.834626000 | 13.353170000 | -0.854519000 |
| 1 | 7.767718000 | 11.834077000 | -0.557623000 |



**9cb**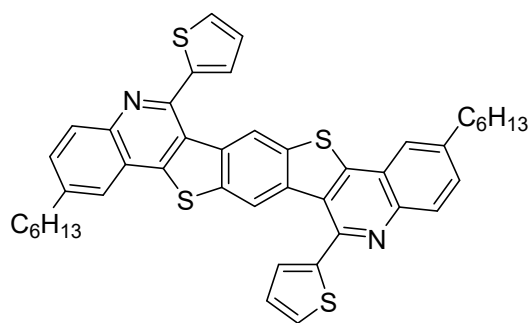

xyz

0 1

|    |              |             |              |
|----|--------------|-------------|--------------|
| 6  | -0.615727000 | 5.135735000 | 0.251208000  |
| 6  | -0.573368000 | 3.787823000 | 0.682868000  |
| 6  | 0.515472000  | 5.682608000 | -0.307812000 |
| 6  | 0.558173000  | 3.027609000 | 0.547966000  |
| 6  | 1.723884000  | 3.571225000 | -0.036219000 |
| 6  | 1.696375000  | 4.927526000 | -0.459959000 |
| 7  | 2.807734000  | 2.770601000 | -0.203496000 |
| 6  | 3.907570000  | 3.245134000 | -0.748516000 |
| 6  | 4.046719000  | 4.628054000 | -1.100323000 |
| 6  | 2.908753000  | 5.428594000 | -0.984879000 |
| 1  | 0.503131000  | 6.716019000 | -0.634414000 |
| 1  | -1.459262000 | 3.354101000 | 1.131108000  |
| 1  | 0.592070000  | 1.996627000 | 0.872996000  |
| 6  | 5.203649000  | 5.398604000 | -1.530589000 |
| 6  | 4.854133000  | 6.746724000 | -1.808348000 |
| 16 | 3.165809000  | 7.074489000 | -1.487659000 |
| 6  | 6.551246000  | 5.046648000 | -1.619869000 |
| 6  | 5.763644000  | 7.694054000 | -2.243240000 |
| 6  | 7.463253000  | 5.998018000 | -2.041151000 |
| 6  | 7.098445000  | 7.320953000 | -2.406050000 |
| 1  | 5.446049000  | 8.706023000 | -2.433855000 |
| 1  | 6.883032000  | 4.058404000 | -1.346706000 |
| 16 | 9.190901000  | 5.736787000 | -2.135327000 |

|    |              |              |              |
|----|--------------|--------------|--------------|
| 6  | 9.442734000  | 7.375428000  | -2.664740000 |
| 6  | 8.257714000  | 8.097488000  | -2.817836000 |
| 6  | 8.372681000  | 9.445039000  | -3.293558000 |
| 6  | 10.707514000 | 7.968191000  | -2.879614000 |
| 6  | 10.688994000 | 9.345871000  | -3.227780000 |
| 7  | 9.539141000  | 10.035887000 | -3.440785000 |
| 6  | 11.924005000 | 10.009504000 | -3.397294000 |
| 6  | 11.941576000 | 7.301441000  | -2.736273000 |
| 6  | 13.137142000 | 7.956594000  | -2.920596000 |
| 6  | 13.106719000 | 9.334331000  | -3.248668000 |
| 1  | 14.040417000 | 9.864299000  | -3.385654000 |
| 1  | 11.899396000 | 11.059079000 | -3.657258000 |
| 1  | 11.945287000 | 6.250598000  | -2.471044000 |
| 6  | 4.961539000  | 2.255161000  | -1.006157000 |
| 6  | 5.701476000  | 2.060223000  | -2.145123000 |
| 16 | 5.314775000  | 1.035404000  | 0.168602000  |
| 6  | 6.567912000  | 0.941795000  | -2.061680000 |
| 6  | 6.473465000  | 0.299233000  | -0.858163000 |
| 6  | 7.205766000  | 10.243308000 | -3.691243000 |
| 6  | 6.140237000  | 9.879642000  | -4.475571000 |
| 16 | 7.116743000  | 11.920890000 | -3.278646000 |
| 6  | 5.242795000  | 10.947558000 | -4.725741000 |
| 6  | 5.638880000  | 12.111216000 | -4.126347000 |
| 6  | 14.449017000 | 7.225650000  | -2.802251000 |
| 6  | -1.888334000 | 5.927825000  | 0.373464000  |
| 6  | -2.946825000 | 5.504163000  | -0.655253000 |
| 1  | -1.662152000 | 6.988279000  | 0.254186000  |
| 1  | -2.302971000 | 5.805047000  | 1.379479000  |
| 6  | -4.282926000 | 6.232309000  | -0.506234000 |
| 1  | -3.111312000 | 4.426856000  | -0.568270000 |
| 1  | -2.546917000 | 5.670564000  | -1.660536000 |
| 6  | -4.214696000 | 7.737344000  | -0.759176000 |

|   |              |              |              |
|---|--------------|--------------|--------------|
| 1 | -4.683982000 | 6.051647000  | 0.497421000  |
| 1 | -5.001307000 | 5.790379000  | -1.203828000 |
| 6 | -5.582950000 | 8.414574000  | -0.737271000 |
| 1 | -3.737862000 | 7.917942000  | -1.729659000 |
| 1 | -3.573267000 | 8.214560000  | -0.012043000 |
| 6 | -5.507746000 | 9.921011000  | -0.968235000 |
| 1 | -6.067086000 | 8.214766000  | 0.224248000  |
| 1 | -6.222312000 | 7.957556000  | -1.499403000 |
| 1 | -4.906460000 | 10.407147000 | -0.196213000 |
| 1 | -6.498656000 | 10.378287000 | -0.954986000 |
| 1 | -5.049319000 | 10.147644000 | -1.933881000 |
| 6 | 15.465423000 | 7.888219000  | -1.865901000 |
| 1 | 14.895159000 | 7.127019000  | -3.798350000 |
| 1 | 14.257343000 | 6.206540000  | -2.457041000 |
| 6 | 16.682136000 | 7.005679000  | -1.601499000 |
| 1 | 14.975268000 | 8.134665000  | -0.919250000 |
| 1 | 15.800254000 | 8.837322000  | -2.293929000 |
| 6 | 17.754683000 | 7.689744000  | -0.758732000 |
| 1 | 17.117731000 | 6.692711000  | -2.557163000 |
| 1 | 16.359083000 | 6.086339000  | -1.100988000 |
| 6 | 18.954668000 | 6.795151000  | -0.457591000 |
| 1 | 17.312383000 | 8.030075000  | 0.184310000  |
| 1 | 18.098628000 | 8.592981000  | -1.275024000 |
| 6 | 20.034403000 | 7.497592000  | 0.360445000  |
| 1 | 19.382616000 | 6.438770000  | -1.400314000 |
| 1 | 18.612428000 | 5.902786000  | 0.076390000  |
| 1 | 20.419111000 | 8.373562000  | -0.167308000 |
| 1 | 20.877426000 | 6.834907000  | 0.563789000  |
| 1 | 19.639919000 | 7.838743000  | 1.320590000  |
| 1 | 5.143126000  | 13.067819000 | -4.145290000 |
| 1 | 4.349527000  | 10.857735000 | -5.326355000 |
| 1 | 6.016220000  | 8.881761000  | -4.869142000 |

|   |             |              |              |
|---|-------------|--------------|--------------|
| 1 | 5.613998000 | 2.692681000  | -3.015981000 |
| 1 | 7.018340000 | -0.569474000 | -0.526974000 |
| 1 | 7.224068000 | 0.625301000  | -2.859187000 |

9cc

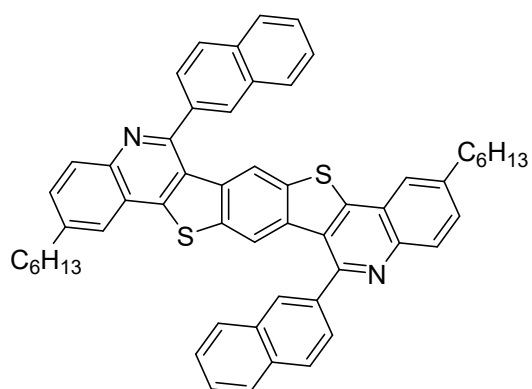

xyz

0 1

|    |              |             |              |
|----|--------------|-------------|--------------|
| 6  | -0.666067000 | 5.118775000 | -0.376687000 |
| 6  | -0.677144000 | 3.719913000 | -0.117403000 |
| 6  | 0.553559000  | 5.748987000 | -0.555668000 |
| 6  | 0.491603000  | 2.994628000 | -0.032221000 |
| 6  | 1.751099000  | 3.626402000 | -0.206826000 |
| 6  | 1.771417000  | 5.029414000 | -0.482921000 |
| 7  | 2.885355000  | 2.887337000 | -0.074299000 |
| 6  | 4.070246000  | 3.441920000 | -0.225070000 |
| 6  | 4.224171000  | 4.816742000 | -0.627868000 |
| 6  | 3.056567000  | 5.591936000 | -0.704061000 |
| 1  | 0.581164000  | 6.822525000 | -0.762553000 |
| 1  | -1.637997000 | 3.217860000 | 0.026020000  |
| 1  | 0.491965000  | 1.924556000 | 0.181961000  |
| 6  | 5.404177000  | 5.579371000 | -1.031030000 |
| 6  | 5.072755000  | 6.936732000 | -1.320432000 |
| 16 | 3.350755000  | 7.258717000 | -1.150676000 |
| 6  | 6.739610000  | 5.181544000 | -1.203523000 |
| 6  | 6.007237000  | 7.881889000 | -1.732243000 |
| 6  | 7.674400000  | 6.125951000 | -1.614333000 |
| 6  | 7.342107000  | 7.483428000 | -1.900901000 |
| 1  | 5.699845000  | 8.907211000 | -1.922757000 |
| 1  | 7.046981000  | 4.156212000 | -1.014374000 |

|    |              |              |              |
|----|--------------|--------------|--------------|
| 16 | 9.398366000  | 5.808481000  | -1.781154000 |
| 6  | 9.689152000  | 7.477672000  | -2.223000000 |
| 6  | 8.520171000  | 8.248213000  | -2.296713000 |
| 6  | 8.661838000  | 9.626809000  | -2.690428000 |
| 6  | 10.971064000 | 8.050261000  | -2.444519000 |
| 6  | 10.979916000 | 9.454424000  | -2.721933000 |
| 7  | 9.840096000  | 10.189681000 | -2.851014000 |
| 6  | 12.233707000 | 10.089709000 | -2.896793000 |
| 6  | 12.192396000 | 7.343021000  | -2.370516000 |
| 6  | 13.413356000 | 7.977768000  | -2.549752000 |
| 6  | 13.411767000 | 9.373847000  | -2.811457000 |
| 1  | 14.358213000 | 9.896604000  | -2.953092000 |
| 1  | 12.228973000 | 11.160566000 | -3.107240000 |
| 1  | 12.170426000 | 6.269912000  | -2.158519000 |
| 6  | 5.228956000  | 2.561872000  | 0.088955000  |
| 6  | 5.261707000  | 1.235623000  | -0.427374000 |
| 6  | 6.306440000  | 0.391873000  | -0.128856000 |
| 6  | 7.370519000  | 0.811600000  | 0.717557000  |
| 6  | 7.481980000  | 10.489995000 | -2.976624000 |
| 6  | 6.499875000  | 10.073219000 | -3.920757000 |
| 6  | 5.431294000  | 10.883435000 | -4.228893000 |
| 6  | 5.273229000  | 12.153479000 | -3.607869000 |
| 6  | 14.691752000 | 7.165866000  | -2.463232000 |
| 6  | -1.964218000 | 5.874954000  | -0.507708000 |
| 6  | -2.605624000 | 5.711050000  | -1.896470000 |
| 1  | -1.785451000 | 6.941746000  | -0.302780000 |
| 1  | -2.676710000 | 5.522243000  | 0.258453000  |
| 6  | -3.960784000 | 6.407551000  | -2.050748000 |
| 1  | -2.723180000 | 4.634027000  | -2.105153000 |
| 1  | -1.901934000 | 6.090248000  | -2.658720000 |
| 6  | -3.913390000 | 7.933383000  | -1.944913000 |
| 1  | -4.663374000 | 6.011511000  | -1.294177000 |

|   |              |              |              |
|---|--------------|--------------|--------------|
| 1 | -4.389161000 | 6.132749000  | -3.030795000 |
| 6 | -5.266214000 | 8.603675000  | -2.191584000 |
| 1 | -3.173971000 | 8.325068000  | -2.668446000 |
| 1 | -3.544654000 | 8.232625000  | -0.947723000 |
| 6 | -5.217186000 | 10.126414000 | -2.079722000 |
| 1 | -6.004337000 | 8.202181000  | -1.473814000 |
| 1 | -5.635743000 | 8.316024000  | -3.192472000 |
| 1 | -4.885849000 | 10.442499000 | -1.076418000 |
| 1 | -6.203996000 | 10.580117000 | -2.262973000 |
| 1 | -4.511093000 | 10.557447000 | -2.809050000 |
| 6 | 16.006648000 | 7.935984000  | -2.563911000 |
| 1 | 14.667681000 | 6.394980000  | -3.254939000 |
| 1 | 14.679240000 | 6.601501000  | -1.513695000 |
| 6 | 17.233196000 | 7.031723000  | -2.438455000 |
| 1 | 16.044911000 | 8.711774000  | -1.778697000 |
| 1 | 16.052227000 | 8.474547000  | -3.526830000 |
| 6 | 18.560551000 | 7.783385000  | -2.535166000 |
| 1 | 17.195204000 | 6.253339000  | -3.222651000 |
| 1 | 17.189759000 | 6.488468000  | -1.476548000 |
| 6 | 19.789700000 | 6.881731000  | -2.409281000 |
| 1 | 18.597178000 | 8.562048000  | -1.750851000 |
| 1 | 18.603504000 | 8.326884000  | -3.497230000 |
| 6 | 21.111371000 | 7.641788000  | -2.505423000 |
| 1 | 19.750159000 | 6.104636000  | -3.193957000 |
| 1 | 19.742811000 | 6.338502000  | -1.448088000 |
| 1 | 21.200568000 | 8.166390000  | -3.471365000 |
| 1 | 21.976801000 | 6.966972000  | -2.411424000 |
| 1 | 21.193036000 | 8.402004000  | -1.710674000 |
| 1 | 4.688266000  | 10.558800000 | -4.961803000 |
| 1 | 6.608622000  | 9.100760000  | -4.405225000 |
| 1 | 4.437716000  | 0.907237000  | -1.062383000 |
| 1 | 6.330849000  | -0.620500000 | -0.540395000 |

|   |              |              |              |
|---|--------------|--------------|--------------|
| 6 | 7.365525000  | 11.733214000 | -2.383999000 |
| 6 | 6.266089000  | 12.586031000 | -2.666786000 |
| 6 | 6.237207000  | 2.981704000  | 0.937993000  |
| 6 | 7.326932000  | 2.134944000  | 1.269283000  |
| 1 | 6.206444000  | 3.986037000  | 1.366259000  |
| 1 | 8.135828000  | 12.065182000 | -1.684901000 |
| 6 | 4.173706000  | 13.008754000 | -3.889658000 |
| 6 | 6.116835000  | 13.857726000 | -2.047171000 |
| 6 | 5.037930000  | 14.663954000 | -2.340893000 |
| 6 | 4.056949000  | 14.235423000 | -3.270611000 |
| 1 | 3.419925000  | 12.676500000 | -4.608250000 |
| 1 | 3.206632000  | 14.883567000 | -3.495626000 |
| 1 | 6.875765000  | 14.184868000 | -1.331903000 |
| 1 | 4.934898000  | 15.638507000 | -1.857874000 |
| 6 | 8.469489000  | -0.029758000 | 1.039961000  |
| 6 | 8.382996000  | 2.561821000  | 2.121335000  |
| 6 | 9.436392000  | 1.721892000  | 2.412994000  |
| 6 | 9.479528000  | 0.413677000  | 1.867780000  |
| 1 | 8.500506000  | -1.038128000 | 0.619073000  |
| 1 | 10.318937000 | -0.243417000 | 2.107342000  |
| 1 | 8.346348000  | 3.571861000  | 2.537575000  |
| 1 | 10.243368000 | 2.061899000  | 3.066315000  |



9cd

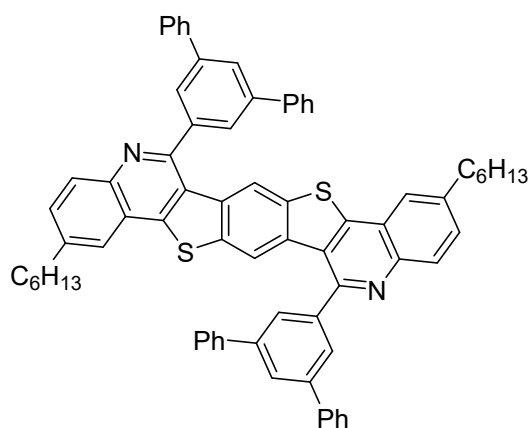

xyz

0 1

|    |              |             |              |
|----|--------------|-------------|--------------|
| 6  | -0.856541000 | 5.356921000 | -0.141978000 |
| 6  | -0.952455000 | 3.945779000 | 0.029893000  |
| 6  | 0.402502000  | 5.917998000 | -0.263292000 |
| 6  | 0.166070000  | 3.144322000 | 0.080447000  |
| 6  | 1.465589000  | 3.704589000 | -0.041465000 |
| 6  | 1.571637000  | 5.116910000 | -0.224015000 |
| 7  | 2.551668000  | 2.890649000 | 0.050633000  |
| 6  | 3.768610000  | 3.380114000 | -0.069353000 |
| 6  | 4.005987000  | 4.766512000 | -0.383728000 |
| 6  | 2.888865000  | 5.616401000 | -0.396864000 |
| 1  | 0.515457000  | 6.993745000 | -0.403888000 |
| 1  | -1.944369000 | 3.495208000 | 0.126119000  |
| 1  | 0.093848000  | 2.064567000 | 0.221375000  |
| 6  | 5.230255000  | 5.485180000 | -0.731779000 |
| 6  | 4.987499000  | 6.881818000 | -0.887179000 |
| 16 | 3.285996000  | 7.295584000 | -0.696495000 |
| 6  | 6.535787000  | 5.023792000 | -0.961660000 |
| 6  | 5.981484000  | 7.800481000 | -1.208144000 |
| 6  | 7.529159000  | 5.941859000 | -1.286978000 |
| 6  | 7.286064000  | 7.338893000 | -1.441357000 |
| 1  | 5.740890000  | 8.857917000 | -1.278026000 |

|    |              |              |              |
|----|--------------|--------------|--------------|
| 1  | 6.776865000  | 3.966626000  | -0.886701000 |
| 16 | 9.228225000  | 5.528624000  | -1.493707000 |
| 6  | 9.623557000  | 7.206906000  | -1.799714000 |
| 6  | 8.507072000  | 8.056999000  | -1.799244000 |
| 6  | 8.738871000  | 9.443066000  | -2.121745000 |
| 6  | 10.938750000 | 7.705055000  | -2.001070000 |
| 6  | 11.040383000 | 9.117716000  | -2.198032000 |
| 7  | 9.951605000  | 9.932075000  | -2.271241000 |
| 6  | 12.333378000 | 9.677498000  | -2.352072000 |
| 6  | 12.110814000 | 6.913361000  | -1.979567000 |
| 6  | 13.369096000 | 7.473219000  | -2.142036000 |
| 6  | 13.459751000 | 8.880620000  | -2.322700000 |
| 1  | 14.439484000 | 9.344280000  | -2.445883000 |
| 1  | 12.399899000 | 10.756837000 | -2.498957000 |
| 1  | 12.018484000 | 5.835011000  | -1.821291000 |
| 6  | 4.880113000  | 2.420578000  | 0.182251000  |
| 6  | 4.825112000  | 1.134562000  | -0.365821000 |
| 6  | 5.955583000  | 2.770111000  | 1.008785000  |
| 6  | 5.851399000  | 0.205989000  | -0.129957000 |
| 6  | 6.937458000  | 0.595375000  | 0.670148000  |
| 6  | 7.006057000  | 1.872566000  | 1.248387000  |
| 6  | 7.622459000  | 10.405497000 | -2.343482000 |
| 6  | 6.535714000  | 10.068527000 | -3.159618000 |
| 6  | 7.683892000  | 11.681035000 | -1.772156000 |
| 6  | 5.479486000  | 10.967484000 | -3.365710000 |
| 6  | 5.555701000  | 12.234809000 | -2.766858000 |
| 6  | 6.653112000  | 12.612348000 | -1.976619000 |
| 1  | 5.969108000  | 3.752647000  | 1.481386000  |
| 1  | 3.978505000  | 0.870520000  | -0.999616000 |
| 1  | 6.515516000  | 9.092987000  | -3.646430000 |
| 1  | 8.538534000  | 11.935080000 | -1.145052000 |
| 1  | 7.748147000  | -0.112849000 | 0.848040000  |

|   |              |              |              |
|---|--------------|--------------|--------------|
| 1 | 4.741172000  | 12.944592000 | -2.919030000 |
| 6 | 14.594164000 | 6.582026000  | -2.149974000 |
| 6 | 15.905765000 | 7.224916000  | -1.696366000 |
| 1 | 14.386889000 | 5.701782000  | -1.518229000 |
| 1 | 14.730686000 | 6.179181000  | -3.171620000 |
| 6 | 17.057118000 | 6.222949000  | -1.607748000 |
| 1 | 15.758556000 | 7.708013000  | -0.713897000 |
| 1 | 16.191833000 | 8.032494000  | -2.392017000 |
| 6 | 18.383002000 | 6.850119000  | -1.178010000 |
| 1 | 17.186779000 | 5.727668000  | -2.587690000 |
| 1 | 16.787058000 | 5.417681000  | -0.900126000 |
| 6 | 19.535793000 | 5.849480000  | -1.082853000 |
| 1 | 18.250887000 | 7.349127000  | -0.200131000 |
| 1 | 18.654635000 | 7.653168000  | -1.888089000 |
| 6 | 20.856946000 | 6.485675000  | -0.654476000 |
| 1 | 19.663583000 | 5.350548000  | -2.060540000 |
| 1 | 19.261814000 | 5.048582000  | -0.372504000 |
| 1 | 21.172880000 | 7.266485000  | -1.366290000 |
| 1 | 21.666509000 | 5.741272000  | -0.594980000 |
| 1 | 20.767555000 | 6.961828000  | 0.336189000  |
| 6 | -2.129131000 | 6.173069000  | -0.193610000 |
| 6 | -1.965909000 | 7.684320000  | -0.334152000 |
| 1 | -2.717678000 | 5.954978000  | 0.716371000  |
| 1 | -2.747671000 | 5.796094000  | -1.029124000 |
| 6 | -3.300226000 | 8.430153000  | -0.353980000 |
| 1 | -1.407916000 | 7.914838000  | -1.258700000 |
| 1 | -1.347854000 | 8.067938000  | 0.496759000  |
| 6 | -3.151855000 | 9.942717000  | -0.515630000 |
| 1 | -3.852392000 | 8.215354000  | 0.579403000  |
| 1 | -3.930108000 | 8.033608000  | -1.171429000 |
| 6 | -4.483898000 | 10.693931000 | -0.535280000 |
| 1 | -2.596614000 | 10.158468000 | -1.447193000 |

|   |              |              |              |
|---|--------------|--------------|--------------|
| 1 | -2.522692000 | 10.336859000 | 0.303835000  |
| 6 | -4.325441000 | 12.205035000 | -0.693825000 |
| 1 | -5.036699000 | 10.474508000 | 0.396084000  |
| 1 | -5.110636000 | 10.298058000 | -1.354819000 |
| 1 | -3.731116000 | 12.632195000 | 0.131058000  |
| 1 | -5.300383000 | 12.717415000 | -0.702721000 |
| 1 | -3.807765000 | 12.455693000 | -1.634741000 |
| 6 | 6.716440000  | 13.960385000 | -1.357177000 |
| 6 | 5.556932000  | 14.592773000 | -0.873924000 |
| 6 | 7.942839000  | 14.639024000 | -1.239453000 |
| 6 | 8.006835000  | 15.906948000 | -0.660220000 |
| 6 | 6.846105000  | 16.523612000 | -0.185066000 |
| 6 | 5.620740000  | 15.860629000 | -0.294276000 |
| 1 | 6.896313000  | 17.516140000 | 0.268822000  |
| 1 | 4.708728000  | 16.330180000 | 0.082386000  |
| 1 | 8.851151000  | 14.175044000 | -1.629334000 |
| 1 | 8.968790000  | 16.420037000 | -0.586337000 |
| 1 | 4.598373000  | 14.072779000 | -0.931009000 |
| 6 | 4.293689000  | 10.571903000 | -4.165972000 |
| 6 | 3.635232000  | 11.487887000 | -5.004758000 |
| 6 | 3.783755000  | 9.263418000  | -4.077760000 |
| 6 | 2.504520000  | 11.108672000 | -5.729819000 |
| 6 | 2.005714000  | 9.806674000  | -5.628264000 |
| 6 | 2.650085000  | 8.885557000  | -4.797857000 |
| 1 | 4.260985000  | 8.539321000  | -3.415684000 |
| 1 | 1.118677000  | 9.511768000  | -6.193868000 |
| 1 | 2.264386000  | 7.868098000  | -4.699036000 |
| 1 | 4.027521000  | 12.502164000 | -5.105788000 |
| 1 | 2.013298000  | 11.833453000 | -6.383677000 |
| 6 | 8.174991000  | 2.280182000  | 2.067423000  |
| 6 | 8.691816000  | 3.585364000  | 1.969684000  |
| 6 | 8.806951000  | 1.375870000  | 2.938891000  |

|   |              |              |              |
|---|--------------|--------------|--------------|
| 6 | 9.806478000  | 3.970906000  | 2.714595000  |
| 6 | 10.424449000 | 3.061960000  | 3.577901000  |
| 6 | 9.919210000  | 1.763218000  | 3.687851000  |
| 1 | 10.390513000 | 1.048084000  | 4.366504000  |
| 1 | 11.296409000 | 3.364419000  | 4.162612000  |
| 1 | 8.407186000  | 0.365187000  | 3.046093000  |
| 1 | 8.233446000  | 4.296600000  | 1.280881000  |
| 1 | 10.200262000 | 4.984947000  | 2.611972000  |
| 6 | 5.794760000  | -1.152907000 | -0.726312000 |
| 6 | 6.960194000  | -1.795221000 | -1.181505000 |
| 6 | 4.569084000  | -1.831735000 | -0.849934000 |
| 6 | 4.511412000  | -3.109546000 | -1.407680000 |
| 6 | 6.902711000  | -3.072955000 | -1.739698000 |
| 6 | 5.677937000  | -3.735992000 | -1.854994000 |
| 1 | 7.918389000  | -1.275138000 | -1.119555000 |
| 1 | 7.819173000  | -3.550512000 | -2.094886000 |
| 1 | 3.549897000  | -3.622685000 | -1.486709000 |
| 1 | 5.632670000  | -4.736285000 | -2.292059000 |
| 1 | 3.656069000  | -1.359446000 | -0.481616000 |

9ce

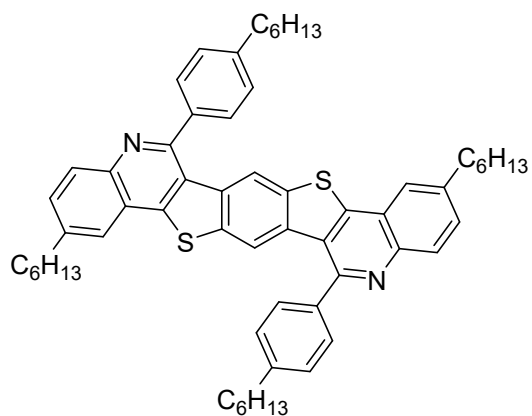

xyz

0 1

|    |              |             |              |
|----|--------------|-------------|--------------|
| 6  | -1.069568000 | 5.626750000 | -0.554640000 |
| 6  | -1.200817000 | 4.222661000 | -0.383717000 |
| 6  | 0.203906000  | 6.165082000 | -0.645260000 |
| 6  | -0.094680000 | 3.402870000 | -0.283981000 |
| 6  | 1.216170000  | 3.938927000 | -0.356211000 |
| 6  | 1.356651000  | 5.350192000 | -0.554652000 |
| 7  | 2.283371000  | 3.096676000 | -0.222928000 |
| 6  | 3.503363000  | 3.577991000 | -0.269237000 |
| 6  | 3.782561000  | 4.973313000 | -0.476033000 |
| 6  | 2.689310000  | 5.835462000 | -0.626609000 |
| 1  | 0.326974000  | 7.244271000 | -0.776117000 |
| 1  | -2.203196000 | 3.791034000 | -0.317569000 |
| 1  | -0.188812000 | 2.325501000 | -0.137691000 |
| 6  | 5.056635000  | 5.681674000 | -0.548927000 |
| 6  | 4.857235000  | 7.076383000 | -0.770488000 |
| 16 | 3.151260000  | 7.504167000 | -0.888698000 |
| 6  | 6.376249000  | 5.215705000 | -0.416858000 |
| 6  | 5.899136000  | 7.992533000 | -0.856774000 |
| 6  | 7.417831000  | 6.135584000 | -0.482905000 |
| 6  | 7.215648000  | 7.531356000 | -0.695235000 |
| 1  | 5.684147000  | 9.042357000 | -1.028100000 |

|    |              |              |              |
|----|--------------|--------------|--------------|
| 1  | 6.590429000  | 4.164480000  | -0.250384000 |
| 16 | 9.124208000  | 5.726918000  | -0.288538000 |
| 6  | 9.574829000  | 7.412334000  | -0.464534000 |
| 6  | 8.479988000  | 8.258717000  | -0.681515000 |
| 6  | 8.744764000  | 9.661862000  | -0.844944000 |
| 6  | 10.895996000 | 7.927956000  | -0.398102000 |
| 6  | 11.023198000 | 9.342694000  | -0.575696000 |
| 7  | 9.956176000  | 10.165128000 | -0.795958000 |
| 6  | 12.323013000 | 9.909960000  | -0.514956000 |
| 6  | 12.052347000 | 7.142159000  | -0.169305000 |
| 6  | 13.312865000 | 7.711870000  | -0.116552000 |
| 6  | 13.429820000 | 9.118656000  | -0.293796000 |
| 1  | 14.421789000 | 9.576362000  | -0.247398000 |
| 1  | 12.404305000 | 10.990286000 | -0.646454000 |
| 1  | 11.939093000 | 6.064242000  | -0.028079000 |
| 6  | 4.659143000  | 2.647731000  | -0.101824000 |
| 6  | 5.277102000  | 2.078255000  | -1.222451000 |
| 6  | 5.236756000  | 2.458660000  | 1.159606000  |
| 6  | 6.485096000  | 1.394064000  | -1.089289000 |
| 6  | 7.108041000  | 1.261788000  | 0.161492000  |
| 6  | 6.447598000  | 1.775666000  | 1.286732000  |
| 6  | 7.590699000  | 10.573220000 | -1.106385000 |
| 6  | 7.171859000  | 10.805837000 | -2.423305000 |
| 6  | 6.819487000  | 11.078037000 | -0.053083000 |
| 6  | 5.971493000  | 11.467599000 | -2.675361000 |
| 6  | 5.152708000  | 11.910373000 | -1.623792000 |
| 6  | 5.613480000  | 11.734697000 | -0.311435000 |
| 1  | 4.757265000  | 2.892822000  | 2.039895000  |
| 1  | 4.827597000  | 2.212075000  | -2.209009000 |
| 1  | 7.774624000  | 10.426983000 | -3.251781000 |
| 1  | 7.140040000  | 10.908278000 | 0.977344000  |
| 6  | 14.546982000 | 6.865483000  | 0.070405000  |

|   |              |              |              |
|---|--------------|--------------|--------------|
| 6 | -2.283222000 | 6.516379000  | -0.669695000 |
| 6 | -2.586032000 | 6.926086000  | -2.119884000 |
| 1 | 5.003364000  | 12.090404000 | 0.523248000  |
| 1 | 5.646535000  | 11.617026000 | -3.708808000 |
| 1 | 6.972409000  | 0.981357000  | -1.977164000 |
| 1 | 6.905462000  | 1.666527000  | 2.273740000  |
| 6 | 3.779163000  | 12.465540000 | -1.914209000 |
| 6 | 2.809591000  | 11.366611000 | -2.381039000 |
| 1 | 3.844740000  | 13.240499000 | -2.697937000 |
| 1 | 3.375563000  | 12.960679000 | -1.015696000 |
| 6 | 1.404390000  | 11.868920000 | -2.710346000 |
| 1 | 2.755089000  | 10.579579000 | -1.608540000 |
| 1 | 3.236571000  | 10.874537000 | -3.272558000 |
| 6 | 0.522599000  | 10.802558000 | -3.362245000 |
| 1 | 1.477440000  | 12.737926000 | -3.390099000 |
| 1 | 0.918682000  | 12.246795000 | -1.791958000 |
| 6 | -0.892881000 | 11.281273000 | -3.690326000 |
| 1 | 0.467761000  | 9.913382000  | -2.706632000 |
| 1 | 1.011831000  | 10.454794000 | -4.290806000 |
| 6 | -1.699373000 | 10.267287000 | -4.499800000 |
| 1 | -0.833741000 | 12.232955000 | -4.248430000 |
| 1 | -1.423912000 | 11.519341000 | -2.751036000 |
| 1 | -1.234201000 | 10.084948000 | -5.482503000 |
| 1 | -2.730112000 | 10.612990000 | -4.675432000 |
| 1 | -1.757841000 | 9.297287000  | -3.981700000 |
| 6 | 8.503372000  | 0.698885000  | 0.264662000  |
| 6 | 9.556427000  | 1.773763000  | -0.054772000 |
| 1 | 8.624318000  | -0.144918000 | -0.435896000 |
| 1 | 8.678671000  | 0.298290000  | 1.277010000  |
| 6 | 10.996425000 | 1.265270000  | -0.000472000 |
| 1 | 9.433430000  | 2.617760000  | 0.647187000  |
| 1 | 9.337771000  | 2.185694000  | -1.053931000 |



|   |              |              |              |
|---|--------------|--------------|--------------|
| 6 | 12.052149000 | 2.327034000  | -0.328320000 |
| 1 | 11.107884000 | 0.416780000  | -0.700983000 |
| 1 | 11.195081000 | 0.853864000  | 1.005069000  |
| 6 | 11.977015000 | 2.881890000  | -1.754400000 |
| 1 | 13.054908000 | 1.891963000  | -0.168737000 |
| 1 | 11.968648000 | 3.163086000  | 0.391358000  |
| 6 | 13.144267000 | 3.804884000  | -2.097058000 |
| 1 | 11.030736000 | 3.432195000  | -1.891850000 |
| 1 | 11.947329000 | 2.038577000  | -2.468297000 |
| 1 | 13.173685000 | 4.670288000  | -1.418888000 |
| 1 | 13.068823000 | 4.196205000  | -3.123756000 |
| 1 | 14.112007000 | 3.283567000  | -2.006374000 |
| 1 | -2.119780000 | 7.420828000  | -0.062199000 |
| 1 | -3.163213000 | 6.007225000  | -0.242290000 |
| 6 | -3.784895000 | 7.866049000  | -2.274938000 |
| 1 | -2.747414000 | 6.014993000  | -2.720588000 |
| 1 | -1.687430000 | 7.409395000  | -2.543207000 |
| 6 | -3.637566000 | 9.206656000  | -1.550022000 |
| 1 | -4.703035000 | 7.359394000  | -1.925272000 |
| 1 | -3.938995000 | 8.058688000  | -3.351035000 |
| 6 | -4.716324000 | 10.224951000 | -1.921704000 |
| 1 | -2.644624000 | 9.635567000  | -1.775452000 |
| 1 | -3.654619000 | 9.050485000  | -0.457042000 |
| 6 | -4.556078000 | 11.562677000 | -1.201703000 |
| 1 | -5.711418000 | 9.798403000  | -1.700788000 |
| 1 | -4.695325000 | 10.387642000 | -3.014188000 |
| 1 | -4.604768000 | 11.436222000 | -0.107269000 |
| 1 | -5.342222000 | 12.278012000 | -1.490464000 |
| 1 | -3.582459000 | 12.024721000 | -1.436179000 |
| 6 | 15.351445000 | 6.686823000  | -1.226833000 |
| 1 | 14.255658000 | 5.873967000  | 0.453769000  |
| 1 | 15.197644000 | 7.317553000  | 0.839431000  |

|   |              |             |              |
|---|--------------|-------------|--------------|
| 6 | 16.525708000 | 5.720898000 | -1.078412000 |
| 1 | 15.717031000 | 7.670384000 | -1.570940000 |
| 1 | 14.675723000 | 6.324548000 | -2.019548000 |
| 6 | 17.303170000 | 5.502461000 | -2.376045000 |
| 1 | 16.147838000 | 4.748170000 | -0.713570000 |
| 1 | 17.211579000 | 6.090363000 | -0.293884000 |
| 6 | 18.474133000 | 4.528356000 | -2.236038000 |
| 1 | 17.678103000 | 6.474136000 | -2.747561000 |
| 1 | 16.611075000 | 5.131339000 | -3.154501000 |
| 6 | 19.239885000 | 4.309969000 | -3.539890000 |
| 1 | 18.095574000 | 3.560099000 | -1.861238000 |
| 1 | 19.164432000 | 4.901180000 | -1.457771000 |
| 1 | 18.581150000 | 3.904135000 | -4.325770000 |
| 1 | 20.075673000 | 3.604724000 | -3.408043000 |
| 1 | 19.658701000 | 5.256839000 | -3.919725000 |

**10aa**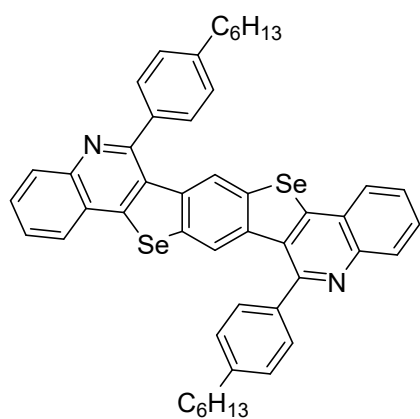

xyz

0 1

|    |              |             |              |
|----|--------------|-------------|--------------|
| 6  | -0.991448000 | 4.916795000 | -0.675235000 |
| 6  | -1.129830000 | 3.511425000 | -0.784361000 |
| 6  | 0.262441000  | 5.490645000 | -0.614094000 |
| 6  | -0.013633000 | 2.700914000 | -0.822035000 |
| 6  | 1.290061000  | 3.259653000 | -0.754414000 |
| 6  | 1.426686000  | 4.682080000 | -0.659960000 |
| 7  | 2.361898000  | 2.421395000 | -0.746644000 |
| 6  | 3.585693000  | 2.901657000 | -0.689191000 |
| 6  | 3.861267000  | 4.317350000 | -0.726137000 |
| 6  | 2.757292000  | 5.177434000 | -0.658288000 |
| 1  | -1.882151000 | 5.548170000 | -0.641719000 |
| 1  | 0.365512000  | 6.576334000 | -0.538290000 |
| 1  | -2.128086000 | 3.070247000 | -0.833834000 |
| 1  | -0.089189000 | 1.614654000 | -0.894158000 |
| 6  | 5.144730000  | 5.010686000 | -0.863546000 |
| 6  | 5.031853000  | 6.430726000 | -0.803574000 |
| 34 | 3.231721000  | 7.008799000 | -0.622982000 |
| 6  | 6.421915000  | 4.470357000 | -1.085764000 |
| 6  | 6.117987000  | 7.290176000 | -0.922525000 |
| 6  | 7.509796000  | 5.329544000 | -1.203395000 |
| 6  | 7.395088000  | 6.748555000 | -1.141412000 |

|    |              |              |              |
|----|--------------|--------------|--------------|
| 1  | 5.976966000  | 8.366078000  | -0.854744000 |
| 1  | 6.568698000  | 3.396430000  | -1.160149000 |
| 16 | 9.177695000  | 4.798376000  | -1.386619000 |
| 6  | 9.735199000  | 6.457435000  | -1.372059000 |
| 6  | 8.695512000  | 7.395851000  | -1.287176000 |
| 6  | 9.062142000  | 8.788532000  | -1.313803000 |
| 6  | 11.097809000 | 6.858872000  | -1.391987000 |
| 6  | 11.329931000 | 8.268676000  | -1.297437000 |
| 7  | 10.318477000 | 9.180193000  | -1.276928000 |
| 6  | 12.670192000 | 8.735663000  | -1.255482000 |
| 6  | 12.200232000 | 5.970343000  | -1.459314000 |
| 6  | 13.491567000 | 6.457744000  | -1.421753000 |
| 6  | 13.727214000 | 7.850046000  | -1.315513000 |
| 1  | 14.754007000 | 8.222126000  | -1.285477000 |
| 1  | 12.822349000 | 9.813849000  | -1.183432000 |
| 1  | 12.018361000 | 4.895329000  | -1.533919000 |
| 1  | 14.336556000 | 5.767378000  | -1.472214000 |
| 6  | 4.666836000  | 1.888214000  | -0.537499000 |
| 6  | 4.774120000  | 0.820142000  | -1.439876000 |
| 6  | 5.562247000  | 1.947253000  | 0.538105000  |
| 6  | 5.780002000  | -0.131688000 | -1.289916000 |
| 6  | 6.694299000  | -0.070533000 | -0.224285000 |
| 6  | 6.559092000  | 0.982322000  | 0.692497000  |
| 6  | 8.048634000  | 9.873265000  | -1.421757000 |
| 6  | 7.077478000  | 9.858968000  | -2.430833000 |
| 6  | 8.092524000  | 10.974199000 | -0.552370000 |
| 6  | 6.154568000  | 10.900359000 | -2.552029000 |
| 6  | 6.172694000  | 11.988022000 | -1.667759000 |
| 6  | 7.162152000  | 12.002888000 | -0.668769000 |
| 1  | 5.484677000  | 2.764658000  | 1.258530000  |
| 1  | 4.063183000  | 0.752117000  | -2.265428000 |
| 1  | 7.041658000  | 9.023066000  | -3.132815000 |

|   |              |              |              |
|---|--------------|--------------|--------------|
| 1 | 8.866083000  | 11.007532000 | 0.216922000  |
| 1 | 7.239575000  | 1.060352000  | 1.541441000  |
| 1 | 5.862187000  | -0.945359000 | -2.016321000 |
| 1 | 7.201037000  | 12.843959000 | 0.029616000  |
| 1 | 5.414782000  | 10.855657000 | -3.352200000 |
| 6 | 5.192231000  | 13.139233000 | -1.758253000 |
| 6 | 4.021304000  | 12.967453000 | -2.723529000 |
| 1 | 5.752063000  | 14.052704000 | -2.032845000 |
| 1 | 4.798721000  | 13.339502000 | -0.745590000 |
| 6 | 3.055717000  | 14.152781000 | -2.706057000 |
| 1 | 3.470273000  | 12.042579000 | -2.475916000 |
| 1 | 4.400813000  | 12.829050000 | -3.751078000 |
| 6 | 1.880317000  | 13.997909000 | -3.670904000 |
| 1 | 3.608965000  | 15.078655000 | -2.948968000 |
| 1 | 2.670115000  | 14.295611000 | -1.679773000 |
| 6 | 0.912084000  | 15.181963000 | -3.658756000 |
| 1 | 1.327444000  | 13.071771000 | -3.426945000 |
| 1 | 2.266624000  | 13.853193000 | -4.696909000 |
| 6 | -0.259172000 | 15.016764000 | -4.625744000 |
| 1 | 1.467343000  | 16.105747000 | -3.902655000 |
| 1 | 0.528756000  | 15.325427000 | -2.632258000 |
| 1 | 0.094149000  | 14.905999000 | -5.664553000 |
| 1 | -0.937883000 | 15.883731000 | -4.594889000 |
| 1 | -0.852552000 | 14.119262000 | -4.383544000 |
| 6 | 7.761164000  | -1.137753000 | -0.094300000 |
| 6 | 8.947490000  | -0.808801000 | 0.811254000  |
| 1 | 8.134627000  | -1.379006000 | -1.104929000 |
| 1 | 7.284383000  | -2.069225000 | 0.265227000  |
| 6 | 10.023669000 | -1.894766000 | 0.799803000  |
| 1 | 8.599505000  | -0.662445000 | 1.848623000  |
| 1 | 9.391706000  | 0.154030000  | 0.501290000  |
| 6 | 11.213466000 | -1.587804000 | 1.709031000  |

|   |              |              |              |
|---|--------------|--------------|--------------|
| 1 | 10.383185000 | -2.041950000 | -0.235290000 |
| 1 | 9.573295000  | -2.859040000 | 1.099426000  |
| 6 | 12.292946000 | -2.671480000 | 1.698193000  |
| 1 | 10.854029000 | -1.441191000 | 2.744502000  |
| 1 | 11.662291000 | -0.622472000 | 1.409708000  |
| 6 | 13.478388000 | -2.355663000 | 2.608827000  |
| 1 | 12.649041000 | -2.816812000 | 0.662188000  |
| 1 | 11.841448000 | -3.634775000 | 1.997166000  |
| 1 | 13.970276000 | -1.414584000 | 2.311031000  |
| 1 | 14.237849000 | -3.152907000 | 2.579507000  |
| 1 | 13.155982000 | -2.239831000 | 3.657097000  |

**10ab**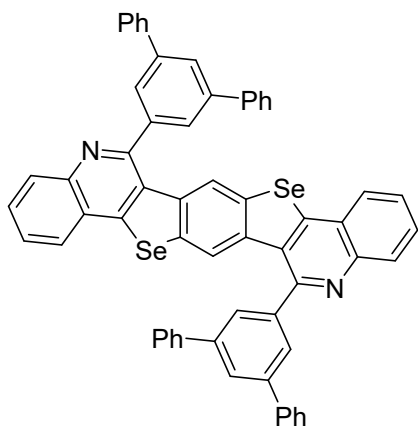

xyz

0 1

|    |              |             |              |
|----|--------------|-------------|--------------|
| 6  | -0.285819000 | 4.338775000 | 1.040152000  |
| 6  | -0.302548000 | 2.938320000 | 0.882582000  |
| 6  | 0.878004000  | 5.042171000 | 0.859321000  |
| 6  | 0.845156000  | 2.261815000 | 0.554702000  |
| 6  | 2.059210000  | 2.957502000 | 0.366681000  |
| 6  | 2.070837000  | 4.373194000 | 0.511897000  |
| 7  | 3.183337000  | 2.243829000 | 0.091467000  |
| 6  | 4.326236000  | 2.858706000 | -0.100234000 |
| 6  | 4.438329000  | 4.290961000 | -0.112793000 |
| 6  | 3.304105000  | 5.010610000 | 0.254834000  |
| 1  | -1.196606000 | 4.859995000 | 1.303392000  |
| 1  | 0.884889000  | 6.119272000 | 0.973013000  |
| 1  | -1.227780000 | 2.396087000 | 1.027173000  |
| 1  | 0.860240000  | 1.186505000 | 0.440445000  |
| 6  | 5.577779000  | 5.129573000 | -0.473653000 |
| 6  | 5.351950000  | 6.512187000 | -0.268789000 |
| 34 | 3.588533000  | 6.878086000 | 0.327300000  |
| 6  | 6.813924000  | 4.760790000 | -1.012989000 |
| 6  | 6.297343000  | 7.484823000 | -0.533535000 |
| 6  | 7.759314000  | 5.733427000 | -1.277745000 |
| 6  | 7.533478000  | 7.116046000 | -1.072904000 |

|    |              |              |              |
|----|--------------|--------------|--------------|
| 1  | 6.072623000  | 8.518174000  | -0.332171000 |
| 1  | 7.038650000  | 3.727433000  | -1.214335000 |
| 34 | 9.522736000  | 5.367524000  | -1.873814000 |
| 6  | 9.807171000  | 7.234997000  | -1.801333000 |
| 6  | 8.672928000  | 7.954659000  | -1.433782000 |
| 6  | 8.785033000  | 9.386918000  | -1.446377000 |
| 6  | 11.040463000 | 7.872397000  | -2.058319000 |
| 6  | 11.052100000 | 9.288087000  | -1.913099000 |
| 7  | 9.927960000  | 10.001774000 | -1.637985000 |
| 6  | 12.266177000 | 9.983758000  | -2.101035000 |
| 6  | 12.233311000 | 7.203404000  | -2.405660000 |
| 6  | 13.397156000 | 7.906784000  | -2.586406000 |
| 6  | 13.413894000 | 9.307238000  | -2.428832000 |
| 1  | 14.339144000 | 9.849458000  | -2.573358000 |
| 1  | 12.251098000 | 11.059068000 | -1.986780000 |
| 1  | 12.226420000 | 6.126303000  | -2.519353000 |
| 1  | 14.307955000 | 7.385551000  | -2.849583000 |
| 6  | 5.510574000  | 1.975228000  | -0.252325000 |
| 6  | 5.490657000  | 0.929522000  | -1.168704000 |
| 6  | 6.628633000  | 2.158851000  | 0.555924000  |
| 6  | 6.592847000  | 0.084329000  | -1.312519000 |
| 6  | 7.716012000  | 0.309220000  | -0.514147000 |
| 6  | 7.750041000  | 1.340970000  | 0.425476000  |
| 6  | 7.600707000  | 10.270441000 | -1.294447000 |
| 6  | 6.482782000  | 10.086935000 | -2.102906000 |
| 6  | 7.620543000  | 11.316130000 | -0.378045000 |
| 6  | 5.361409000  | 10.904892000 | -1.972629000 |
| 6  | 5.395346000  | 11.936608000 | -1.032964000 |
| 6  | 6.518390000  | 12.161396000 | -0.234393000 |
| 1  | 6.629386000  | 2.952057000  | 1.290704000  |
| 1  | 4.597234000  | 0.766074000  | -1.754502000 |
| 1  | 6.482103000  | 9.293765000  | -2.837725000 |



|   |              |              |              |
|---|--------------|--------------|--------------|
| 1 | 8.513881000  | 11.479501000 | 0.207904000  |
| 1 | 4.512772000  | 12.544219000 | -0.885828000 |
| 1 | 8.598602000  | -0.298336000 | -0.661418000 |
| 6 | 6.532580000  | 13.260211000 | 0.755393000  |
| 6 | 5.940671000  | 14.493265000 | 0.465527000  |
| 6 | 7.138015000  | 13.094181000 | 2.004652000  |
| 6 | 5.952836000  | 15.525593000 | 1.393082000  |
| 6 | 7.149775000  | 14.125392000 | 2.933387000  |
| 6 | 6.557078000  | 15.346004000 | 2.631852000  |
| 1 | 6.566701000  | 16.150391000 | 3.355595000  |
| 1 | 5.496747000  | 16.475254000 | 1.144617000  |
| 1 | 7.582956000  | 12.140841000 | 2.257422000  |
| 1 | 7.616720000  | 13.972807000 | 3.897881000  |
| 1 | 5.489869000  | 14.651100000 | -0.505429000 |
| 6 | 8.965316000  | 1.600780000  | 1.226590000  |
| 6 | 9.386171000  | 2.912445000  | 1.468380000  |
| 6 | 9.731937000  | 0.551514000  | 1.741108000  |
| 6 | 10.882166000 | 0.804986000  | 2.475460000  |
| 6 | 10.538332000 | 3.166328000  | 2.199054000  |
| 6 | 11.290840000 | 2.113617000  | 2.706526000  |
| 1 | 8.822374000  | 3.739504000  | 1.057750000  |
| 1 | 10.853398000 | 4.188734000  | 2.362756000  |
| 1 | 11.457435000 | -0.020944000 | 2.873611000  |
| 1 | 12.188969000 | 2.310997000  | 3.276968000  |
| 1 | 9.410461000  | -0.469549000 | 1.582034000  |
| 6 | 4.146255000  | 10.645199000 | -2.773967000 |
| 6 | 3.379806000  | 11.694539000 | -3.288589000 |
| 6 | 3.725336000  | 9.333573000  | -3.015862000 |
| 6 | 2.573282000  | 9.079802000  | -3.746744000 |
| 6 | 1.820948000  | 10.132586000 | -4.254321000 |
| 6 | 2.229686000  | 11.441177000 | -4.023150000 |
| 1 | 3.701336000  | 12.715572000 | -3.129434000 |

|   |             |              |              |
|---|-------------|--------------|--------------|
| 1 | 1.654553000 | 12.267163000 | -4.421380000 |
| 1 | 4.288987000 | 8.506457000  | -2.605147000 |
| 1 | 2.258161000 | 8.057425000  | -3.910522000 |
| 1 | 0.922902000 | 9.935292000  | -4.824924000 |
| 6 | 6.578565000 | -1.014515000 | -2.302272000 |
| 6 | 5.972918000 | -0.848557000 | -3.551438000 |
| 6 | 7.170597000 | -2.247524000 | -2.012466000 |
| 6 | 7.158348000 | -3.279878000 | -2.939990000 |
| 6 | 5.961073000 | -1.879796000 | -4.480142000 |
| 6 | 6.553895000 | -3.100361000 | -4.178668000 |
| 1 | 6.544206000 | -3.904769000 | -4.902387000 |
| 1 | 7.614536000 | -4.229504000 | -2.691573000 |
| 1 | 7.621565000 | -2.405302000 | -1.041578000 |
| 1 | 5.527877000 | 0.104748000  | -3.804162000 |
| 1 | 5.493964000 | -1.727267000 | -5.444565000 |

**10ba**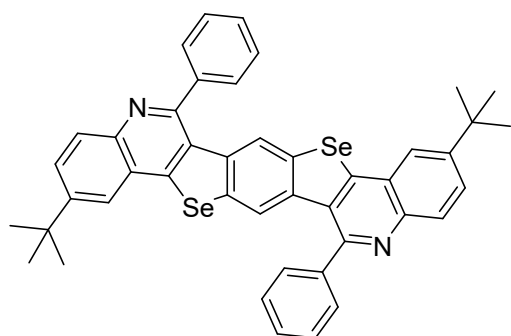

xyz

0 1

|    |              |             |              |
|----|--------------|-------------|--------------|
| 6  | -0.864928000 | 5.020010000 | -0.308878000 |
| 6  | -0.927402000 | 3.596392000 | -0.376923000 |
| 6  | 0.387208000  | 5.609358000 | -0.293343000 |
| 6  | 0.208017000  | 2.818931000 | -0.418672000 |
| 6  | 1.496860000  | 3.413585000 | -0.397932000 |
| 6  | 1.577095000  | 4.838350000 | -0.344592000 |
| 7  | 2.597298000  | 2.615337000 | -0.395487000 |
| 6  | 3.803410000  | 3.143330000 | -0.381102000 |
| 6  | 4.022522000  | 4.566150000 | -0.457372000 |
| 6  | 2.885887000  | 5.384421000 | -0.385648000 |
| 1  | 0.483700000  | 6.694318000 | -0.249913000 |
| 1  | -1.901899000 | 3.104582000 | -0.391960000 |
| 1  | 0.156671000  | 1.729560000 | -0.459891000 |
| 6  | 5.272336000  | 5.307749000 | -0.639376000 |
| 6  | 5.104329000  | 6.721760000 | -0.611178000 |
| 34 | 3.287160000  | 7.233320000 | -0.405522000 |
| 6  | 6.568179000  | 4.817991000 | -0.874612000 |
| 6  | 6.154439000  | 7.618472000 | -0.772784000 |
| 6  | 7.618179000  | 5.714734000 | -1.037071000 |
| 6  | 7.450395000  | 7.128833000 | -1.008389000 |
| 1  | 5.968190000  | 8.687895000 | -0.722540000 |
| 1  | 6.754212000  | 3.748504000 | -0.925014000 |

|    |              |              |              |
|----|--------------|--------------|--------------|
| 34 | 9.434690000  | 5.203630000  | -1.247315000 |
| 6  | 9.835093000  | 7.052183000  | -1.269571000 |
| 6  | 8.699988000  | 7.869967000  | -1.192864000 |
| 6  | 8.918962000  | 9.294805000  | -1.267630000 |
| 6  | 11.145305000 | 7.598894000  | -1.316432000 |
| 6  | 11.226080000 | 9.025509000  | -1.261180000 |
| 7  | 10.123432000 | 9.823380000  | -1.257208000 |
| 6  | 12.511910000 | 9.618241000  | -1.246711000 |
| 6  | 12.333599000 | 6.834717000  | -1.375281000 |
| 6  | 13.590354000 | 7.423851000  | -1.366821000 |
| 6  | 13.653301000 | 8.842576000  | -1.296611000 |
| 1  | 14.621578000 | 9.341423000  | -1.286162000 |
| 1  | 12.563668000 | 10.707586000 | -1.204311000 |
| 1  | 12.244639000 | 5.746677000  | -1.419990000 |
| 6  | 4.921849000  | 2.168642000  | -0.229264000 |
| 6  | 5.027742000  | 1.076668000  | -1.102156000 |
| 6  | 5.836477000  | 2.288179000  | 0.828964000  |
| 6  | 6.052200000  | 0.141352000  | -0.942750000 |
| 6  | 6.968491000  | 0.274840000  | 0.104774000  |
| 6  | 6.852479000  | 1.346086000  | 0.996284000  |
| 6  | 7.798429000  | 10.268265000 | -1.412815000 |
| 6  | 6.881983000  | 10.151661000 | -2.469777000 |
| 6  | 7.691893000  | 11.355725000 | -0.534446000 |
| 6  | 5.863674000  | 11.092393000 | -2.630663000 |
| 6  | 5.747084000  | 12.159098000 | -1.733800000 |
| 6  | 6.665089000  | 12.289565000 | -0.687406000 |
| 1  | 5.749239000  | 3.127975000  | 1.521868000  |
| 1  | 4.295832000  | 0.970918000  | -1.904938000 |
| 1  | 6.969424000  | 9.315130000  | -3.166606000 |
| 1  | 8.424991000  | 11.459124000 | 0.267566000  |
| 1  | 7.555283000  | 1.447463000  | 1.826698000  |
| 1  | 6.133307000  | -0.698789000 | -1.636728000 |

|   |              |              |              |
|---|--------------|--------------|--------------|
| 1 | 6.583432000  | 13.126138000 | 0.010803000  |
| 1 | 5.159362000  | 10.993379000 | -3.460080000 |
| 1 | 7.767876000  | -0.459274000 | 0.231198000  |
| 1 | 4.945784000  | 12.891987000 | -1.855077000 |
| 6 | -2.167604000 | 5.828775000  | -0.259141000 |
| 6 | -2.996195000 | 5.533824000  | -1.527669000 |
| 1 | -3.939338000 | 6.103373000  | -1.509643000 |
| 1 | -3.251813000 | 4.467139000  | -1.612234000 |
| 1 | -2.439570000 | 5.819376000  | -2.433848000 |
| 6 | -1.908263000 | 7.341273000  | -0.191335000 |
| 1 | -1.338505000 | 7.617952000  | 0.709049000  |
| 1 | -2.866522000 | 7.881825000  | -0.157156000 |
| 1 | -1.355376000 | 7.700621000  | -1.072864000 |
| 6 | -2.972535000 | 5.416516000  | 0.991838000  |
| 1 | -3.225869000 | 4.345970000  | 0.982398000  |
| 1 | -3.916130000 | 5.983265000  | 1.043780000  |
| 1 | -2.399500000 | 5.618537000  | 1.910151000  |
| 6 | 14.848391000 | 6.541915000  | -1.428454000 |
| 6 | 14.821188000 | 5.706748000  | -2.726098000 |
| 1 | 13.938745000 | 5.051289000  | -2.771259000 |
| 1 | 15.717160000 | 5.068413000  | -2.790638000 |
| 1 | 14.800107000 | 6.359657000  | -3.612525000 |
| 6 | 14.866584000 | 5.597344000  | -0.207850000 |
| 1 | 13.984665000 | 4.939901000  | -0.187736000 |
| 1 | 14.879111000 | 6.171068000  | 0.731937000  |
| 1 | 15.762856000 | 4.956568000  | -0.231376000 |
| 6 | 16.141648000 | 7.371784000  | -1.415936000 |
| 1 | 16.199819000 | 8.052462000  | -2.279143000 |
| 1 | 17.012762000 | 6.700466000  | -1.463394000 |
| 1 | 16.234986000 | 7.971443000  | -0.497504000 |

**10bb**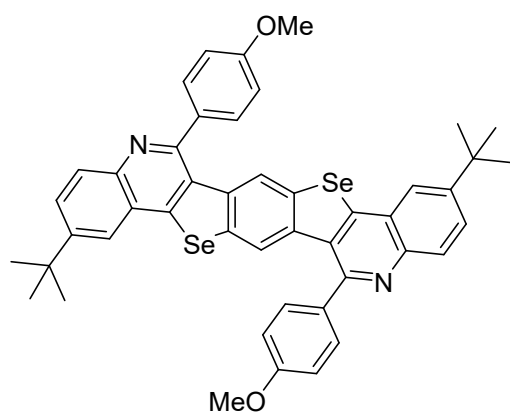

xyz

0 1

|    |              |             |              |
|----|--------------|-------------|--------------|
| 6  | -0.892803000 | 5.154153000 | -0.329138000 |
| 6  | -0.978235000 | 3.732334000 | -0.407678000 |
| 6  | 0.368957000  | 5.722074000 | -0.299869000 |
| 6  | 0.144520000  | 2.936391000 | -0.445305000 |
| 6  | 1.443388000  | 3.508657000 | -0.409631000 |
| 6  | 1.546146000  | 4.931659000 | -0.347371000 |
| 7  | 2.529781000  | 2.692196000 | -0.397156000 |
| 6  | 3.746290000  | 3.198457000 | -0.371412000 |
| 6  | 3.986817000  | 4.618986000 | -0.452509000 |
| 6  | 2.864107000  | 5.455772000 | -0.380486000 |
| 1  | 0.483402000  | 6.805005000 | -0.249352000 |
| 1  | -1.960590000 | 3.256789000 | -0.433979000 |
| 1  | 0.075212000  | 1.848268000 | -0.493531000 |
| 6  | 5.247216000  | 5.340743000 | -0.642737000 |
| 6  | 5.102989000  | 6.757281000 | -0.611614000 |
| 34 | 3.295230000  | 7.298219000 | -0.399211000 |
| 6  | 6.532895000  | 4.831112000 | -0.891645000 |
| 6  | 6.166295000  | 7.636893000 | -0.780205000 |
| 6  | 7.596053000  | 5.710677000 | -1.061224000 |
| 6  | 7.452077000  | 7.127414000 | -1.029324000 |
| 1  | 5.998108000  | 8.709070000 | -0.725936000 |

|    |              |              |              |
|----|--------------|--------------|--------------|
| 1  | 6.700691000  | 3.758816000  | -0.945970000 |
| 34 | 9.402911000  | 5.170102000  | -1.280010000 |
| 6  | 9.833312000  | 7.012153000  | -1.300799000 |
| 6  | 8.712317000  | 7.848532000  | -1.222502000 |
| 6  | 8.953054000  | 9.271149000  | -1.300142000 |
| 6  | 11.152765000 | 7.536736000  | -1.340393000 |
| 6  | 11.256538000 | 8.961432000  | -1.273981000 |
| 7  | 10.168024000 | 9.777813000  | -1.278051000 |
| 6  | 12.552589000 | 9.531460000  | -1.244755000 |
| 6  | 12.328282000 | 6.753038000  | -1.398157000 |
| 6  | 13.594886000 | 7.320339000  | -1.376392000 |
| 6  | 13.681162000 | 8.737061000  | -1.293052000 |
| 1  | 14.657576000 | 9.219508000  | -1.271455000 |
| 1  | 12.622617000 | 10.619441000 | -1.193576000 |
| 1  | 12.221089000 | 5.667020000  | -1.451865000 |
| 6  | 4.846872000  | 2.210911000  | -0.204732000 |
| 6  | 4.908290000  | 1.074222000  | -1.017444000 |
| 6  | 5.798413000  | 2.347852000  | 0.822897000  |
| 6  | 5.910123000  | 0.114237000  | -0.851281000 |
| 6  | 6.863354000  | 0.273126000  | 0.166093000  |
| 6  | 6.791962000  | 1.396096000  | 1.009666000  |
| 6  | 7.850263000  | 10.257842000 | -1.458241000 |
| 6  | 6.897793000  | 10.125815000 | -2.485626000 |
| 6  | 7.787035000  | 11.388236000 | -0.637084000 |
| 6  | 5.901601000  | 11.076386000 | -2.664220000 |
| 6  | 5.828307000  | 12.192861000 | -1.812207000 |
| 6  | 6.782409000  | 12.346768000 | -0.794894000 |
| 1  | 5.755203000  | 3.215893000  | 1.484125000  |
| 1  | 4.153284000  | 0.942256000  | -1.794504000 |
| 1  | 6.942252000  | 9.262431000  | -3.152860000 |
| 1  | 8.542459000  | 11.516486000 | 0.140207000  |
| 1  | 7.529727000  | 1.492704000  | 1.808021000  |

|   |              |              |              |
|---|--------------|--------------|--------------|
| 1 | 5.934310000  | -0.750600000 | -1.513570000 |
| 1 | 6.756679000  | 13.206572000 | -0.126146000 |
| 1 | 5.162931000  | 10.983688000 | -3.462198000 |
| 6 | -2.182133000 | 5.984376000  | -0.283883000 |
| 6 | -3.006238000 | 5.712162000  | -1.560301000 |
| 1 | -3.938946000 | 6.298850000  | -1.546196000 |
| 1 | -3.280694000 | 4.650858000  | -1.653299000 |
| 1 | -2.437453000 | 5.992668000  | -2.460486000 |
| 6 | -1.898014000 | 7.491832000  | -0.203958000 |
| 1 | -1.330519000 | 7.752919000  | 0.702487000  |
| 1 | -2.847312000 | 8.048260000  | -0.173373000 |
| 1 | -1.332318000 | 7.847531000  | -1.078790000 |
| 6 | -3.003321000 | 5.577518000  | 0.958320000  |
| 1 | -3.275878000 | 4.511842000  | 0.938498000  |
| 1 | -3.936823000 | 6.160977000  | 1.008665000  |
| 1 | -2.432753000 | 5.761655000  | 1.881912000  |
| 6 | 14.838086000 | 6.417368000  | -1.436639000 |
| 6 | 14.804257000 | 5.590074000  | -2.739104000 |
| 1 | 13.911145000 | 4.949928000  | -2.792929000 |
| 1 | 15.689712000 | 4.937043000  | -2.802548000 |
| 1 | 14.798990000 | 6.248315000  | -3.621834000 |
| 6 | 14.833656000 | 5.465621000  | -0.221510000 |
| 1 | 13.940690000 | 4.823040000  | -0.210297000 |
| 1 | 14.849960000 | 6.033795000  | 0.721572000  |
| 1 | 15.719306000 | 4.810092000  | -0.243381000 |
| 6 | 16.145139000 | 7.225054000  | -1.412425000 |
| 1 | 16.218553000 | 7.910887000  | -2.270387000 |
| 1 | 17.005140000 | 6.539554000  | -1.460799000 |
| 1 | 16.244256000 | 7.816519000  | -0.489308000 |
| 8 | 7.873495000  | -0.595972000 | 0.412874000  |
| 6 | 7.996950000  | -1.747136000 | -0.390102000 |
| 1 | 7.106024000  | -2.396344000 | -0.316224000 |



|   |             |              |              |
|---|-------------|--------------|--------------|
| 1 | 8.871035000 | -2.297437000 | -0.017640000 |
| 1 | 8.160152000 | -1.490557000 | -1.452417000 |
| 8 | 4.815303000 | 13.060854000 | -2.051053000 |
| 6 | 4.690188000 | 14.206059000 | -1.239830000 |
| 1 | 4.528605000 | 13.941638000 | -0.179180000 |
| 1 | 3.814414000 | 14.756957000 | -1.607401000 |
| 1 | 5.579664000 | 14.857635000 | -1.310012000 |

**10bc**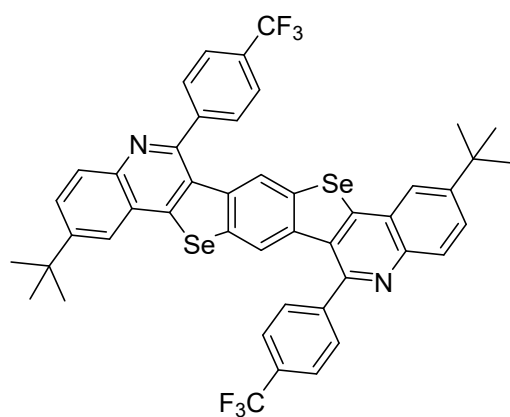

xyz

0 1

|    |              |             |              |
|----|--------------|-------------|--------------|
| 6  | -0.861265000 | 5.040607000 | -0.369930000 |
| 6  | -0.925179000 | 3.617848000 | -0.455722000 |
| 6  | 0.391430000  | 5.627961000 | -0.335320000 |
| 6  | 0.208994000  | 2.838720000 | -0.496523000 |
| 6  | 1.498064000  | 3.431569000 | -0.457816000 |
| 6  | 1.580418000  | 4.855780000 | -0.386049000 |
| 7  | 2.598117000  | 2.632561000 | -0.454984000 |
| 6  | 3.803329000  | 3.161032000 | -0.427452000 |
| 6  | 4.025961000  | 4.582606000 | -0.490352000 |
| 6  | 2.889881000  | 5.401214000 | -0.411131000 |
| 1  | 0.488392000  | 6.712202000 | -0.278413000 |
| 1  | -1.900240000 | 3.128067000 | -0.485664000 |
| 1  | 0.155733000  | 1.750072000 | -0.550994000 |
| 6  | 5.276948000  | 5.323890000 | -0.661074000 |
| 6  | 5.111690000  | 6.737088000 | -0.603608000 |
| 34 | 3.294773000  | 7.249040000 | -0.394116000 |
| 6  | 6.569755000  | 4.835692000 | -0.915414000 |
| 6  | 6.165116000  | 7.632979000 | -0.746706000 |
| 6  | 7.622494000  | 5.731693000 | -1.064506000 |
| 6  | 7.458635000  | 7.145231000 | -0.999085000 |
| 1  | 5.980299000  | 8.700681000 | -0.668828000 |

|    |              |              |              |
|----|--------------|--------------|--------------|
| 1  | 6.752747000  | 3.767416000  | -0.996067000 |
| 34 | 9.434086000  | 5.220478000  | -1.308056000 |
| 6  | 9.840582000  | 7.066902000  | -1.291360000 |
| 6  | 8.709249000  | 7.886015000  | -1.176231000 |
| 6  | 8.934915000  | 9.309656000  | -1.211742000 |
| 6  | 11.151290000 | 7.611255000  | -1.350091000 |
| 6  | 11.239148000 | 9.036185000  | -1.264409000 |
| 7  | 10.139197000 | 9.836828000  | -1.213381000 |
| 6  | 12.526607000 | 9.625017000  | -1.266361000 |
| 6  | 12.335199000 | 6.844787000  | -1.451314000 |
| 6  | 13.593801000 | 7.429952000  | -1.458290000 |
| 6  | 13.663380000 | 8.846814000  | -1.359181000 |
| 1  | 14.633559000 | 9.341904000  | -1.360116000 |
| 1  | 12.583662000 | 10.712920000 | -1.201049000 |
| 1  | 12.242177000 | 5.758309000  | -1.518196000 |
| 6  | 4.916898000  | 2.183126000  | -0.262145000 |
| 6  | 5.008788000  | 1.069526000  | -1.108746000 |
| 6  | 5.837113000  | 2.317994000  | 0.789136000  |
| 6  | 6.025618000  | 0.131641000  | -0.936970000 |
| 6  | 6.951229000  | 0.287510000  | 0.100768000  |
| 6  | 6.847634000  | 1.376831000  | 0.972954000  |
| 6  | 7.814813000  | 10.291841000 | -1.294576000 |
| 6  | 6.890577000  | 10.236445000 | -2.349699000 |
| 6  | 7.711541000  | 11.322703000 | -0.351522000 |
| 6  | 5.864121000  | 11.173160000 | -2.442343000 |
| 6  | 5.746942000  | 12.176298000 | -1.472719000 |
| 6  | 6.676849000  | 12.254463000 | -0.431227000 |
| 1  | 5.758024000  | 3.169127000  | 1.468140000  |
| 1  | 4.269345000  | 0.946408000  | -1.901398000 |
| 1  | 6.976868000  | 9.448534000  | -3.100558000 |
| 1  | 8.452320000  | 11.385343000 | 0.447105000  |
| 1  | 7.553906000  | 1.481985000  | 1.797754000  |

|   |              |              |              |
|---|--------------|--------------|--------------|
| 1 | 6.097740000  | -0.729431000 | -1.603368000 |
| 1 | 6.592940000  | 13.048619000 | 0.311950000  |
| 1 | 5.153756000  | 11.129684000 | -3.269642000 |
| 6 | -2.162906000 | 5.850889000  | -0.324380000 |
| 6 | -2.976783000 | 5.573213000  | -1.606355000 |
| 1 | -3.919577000 | 6.143174000  | -1.591105000 |
| 1 | -3.232202000 | 4.507996000  | -1.708401000 |
| 1 | -2.409946000 | 5.871009000  | -2.502174000 |
| 6 | -1.901782000 | 7.361885000  | -0.234082000 |
| 1 | -1.341996000 | 7.626260000  | 0.676192000  |
| 1 | -2.859465000 | 7.903428000  | -0.203544000 |
| 1 | -1.339094000 | 7.732265000  | -1.104737000 |
| 6 | -2.982506000 | 5.423425000  | 0.911928000  |
| 1 | -3.238416000 | 4.353770000  | 0.885620000  |
| 1 | -3.925233000 | 5.991677000  | 0.960268000  |
| 1 | -2.419879000 | 5.612384000  | 1.839388000  |
| 6 | 14.846980000 | 6.546081000  | -1.567858000 |
| 6 | 14.788165000 | 5.742814000  | -2.884538000 |
| 1 | 13.902878000 | 5.090987000  | -2.926304000 |
| 1 | 15.680148000 | 5.103568000  | -2.983693000 |
| 1 | 14.750521000 | 6.416933000  | -3.754381000 |
| 6 | 14.887432000 | 5.572544000  | -0.370760000 |
| 1 | 14.004691000 | 4.916360000  | -0.347710000 |
| 1 | 14.921775000 | 6.123335000  | 0.582097000  |
| 1 | 15.781030000 | 4.930499000  | -0.428812000 |
| 6 | 16.142965000 | 7.371697000  | -1.563231000 |
| 1 | 16.186078000 | 8.071674000  | -2.411774000 |
| 1 | 17.010292000 | 6.698865000  | -1.644218000 |
| 1 | 16.257707000 | 7.949545000  | -0.633306000 |
| 6 | 8.087704000  | -0.689528000 | 0.248118000  |
| 9 | 7.744295000  | -1.924722000 | -0.156020000 |
| 6 | 4.586734000  | 13.134477000 | -1.532122000 |

|   |             |              |              |
|---|-------------|--------------|--------------|
| 9 | 4.838890000 | 14.276323000 | -0.870529000 |
| 9 | 4.271709000 | 13.459273000 | -2.798631000 |
| 9 | 3.478174000 | 12.597927000 | -0.981929000 |
| 9 | 8.510085000 | -0.781296000 | 1.521140000  |
| 9 | 9.153404000 | -0.319149000 | -0.491277000 |

**10bd**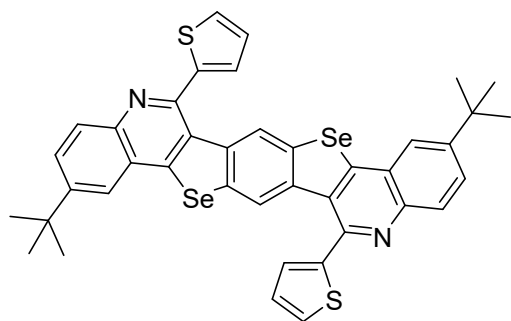

xyz

0 1

|    |              |             |              |
|----|--------------|-------------|--------------|
| 6  | -0.750188000 | 5.060880000 | -0.393352000 |
| 6  | -0.789439000 | 3.636847000 | -0.311721000 |
| 6  | 0.491579000  | 5.669869000 | -0.435543000 |
| 6  | 0.358535000  | 2.878598000 | -0.270674000 |
| 6  | 1.637512000  | 3.493555000 | -0.310977000 |
| 6  | 1.694816000  | 4.918340000 | -0.400626000 |
| 7  | 2.749469000  | 2.712619000 | -0.243186000 |
| 6  | 3.943353000  | 3.263844000 | -0.289008000 |
| 6  | 4.142904000  | 4.681066000 | -0.439170000 |
| 6  | 2.993689000  | 5.484129000 | -0.464671000 |
| 1  | 0.570057000  | 6.755016000 | -0.502289000 |
| 1  | -1.755701000 | 3.130086000 | -0.277808000 |
| 1  | 0.325856000  | 1.789935000 | -0.202084000 |
| 6  | 5.393033000  | 5.426673000 | -0.583885000 |
| 6  | 5.206052000  | 6.835817000 | -0.669165000 |
| 34 | 3.373786000  | 7.331347000 | -0.609685000 |
| 6  | 6.707201000  | 4.939431000 | -0.687358000 |
| 6  | 6.254876000  | 7.737608000 | -0.805179000 |
| 6  | 7.755774000  | 5.841235000 | -0.824624000 |
| 6  | 7.572812000  | 7.252951000 | -0.866294000 |
| 1  | 6.051379000  | 8.802150000 | -0.879466000 |
| 1  | 6.905134000  | 3.871184000 | -0.677498000 |
| 34 | 9.578970000  | 5.339152000 | -1.004893000 |

|   |              |              |              |
|---|--------------|--------------|--------------|
| 6 | 9.960326000  | 7.187418000  | -1.124522000 |
| 6 | 8.823452000  | 7.998082000  | -1.009368000 |
| 6 | 9.031289000  | 9.423182000  | -1.055375000 |
| 6 | 11.250503000 | 7.746024000  | -1.323526000 |
| 6 | 11.309689000 | 9.173369000  | -1.399418000 |
| 7 | 10.212036000 | 9.966189000  | -1.251922000 |
| 6 | 12.572035000 | 9.776326000  | -1.618863000 |
| 6 | 12.439217000 | 6.991569000  | -1.459005000 |
| 6 | 13.672692000 | 7.590750000  | -1.671803000 |
| 6 | 13.712824000 | 9.010154000  | -1.751155000 |
| 1 | 14.662818000 | 9.516291000  | -1.917683000 |
| 1 | 12.605928000 | 10.865724000 | -1.674577000 |
| 1 | 12.368040000 | 5.903216000  | -1.395786000 |
| 6 | 5.099365000  | 2.341350000  | -0.153424000 |
| 6 | 7.898930000  | 10.364259000 | -0.858243000 |
| 6 | -2.066088000 | 5.848464000  | -0.431109000 |
| 6 | -2.883326000 | 5.410823000  | -1.665381000 |
| 1 | -3.836271000 | 5.962393000  | -1.708251000 |
| 1 | -3.119905000 | 4.336695000  | -1.641355000 |
| 1 | -2.327733000 | 5.612423000  | -2.594443000 |
| 6 | -1.831965000 | 7.364106000  | -0.517765000 |
| 1 | -1.270899000 | 7.740856000  | 0.351215000  |
| 1 | -1.281262000 | 7.640874000  | -1.429901000 |
| 1 | -2.799150000 | 7.889030000  | -0.541659000 |
| 6 | -2.869969000 | 5.552945000  | 0.853113000  |
| 1 | -3.106996000 | 4.483240000  | 0.952125000  |
| 1 | -3.822294000 | 6.107159000  | 0.844085000  |
| 1 | -2.304199000 | 5.856518000  | 1.747659000  |
| 6 | 14.931484000 | 6.719037000  | -1.812507000 |
| 6 | 14.757638000 | 5.765678000  | -3.013841000 |
| 1 | 13.890162000 | 5.101266000  | -2.885721000 |
| 1 | 15.651263000 | 5.132042000  | -3.133330000 |

|    |              |              |              |
|----|--------------|--------------|--------------|
| 1  | 14.611487000 | 6.332446000  | -3.946525000 |
| 6  | 15.124178000 | 5.893748000  | -0.522514000 |
| 1  | 14.266834000 | 5.231885000  | -0.329502000 |
| 1  | 15.242483000 | 6.553375000  | 0.351198000  |
| 1  | 16.024344000 | 5.263014000  | -0.601362000 |
| 6  | 16.197913000 | 7.558617000  | -2.041915000 |
| 1  | 16.133257000 | 8.153703000  | -2.965759000 |
| 1  | 17.070443000 | 6.894150000  | -2.135942000 |
| 1  | 16.392286000 | 8.244484000  | -1.203115000 |
| 6  | 5.647751000  | 1.510711000  | -1.100352000 |
| 16 | 5.970466000  | 2.232942000  | 1.352790000  |
| 6  | 6.788535000  | 0.795197000  | -0.621677000 |
| 6  | 7.084087000  | 1.087906000  | 0.686195000  |
| 16 | 7.287521000  | 10.688155000 | 0.741217000  |
| 6  | 6.058006000  | 11.733782000 | 0.115966000  |
| 6  | 7.185658000  | 11.054868000 | -1.807821000 |
| 6  | 6.127289000  | 11.837177000 | -1.250810000 |
| 1  | 5.448234000  | 12.453654000 | -1.841411000 |
| 1  | 5.366038000  | 12.230065000 | 0.794596000  |
| 1  | 7.408734000  | 10.985729000 | -2.872895000 |
| 1  | 5.249172000  | 1.433094000  | -2.112282000 |
| 1  | 7.363154000  | 0.089920000  | -1.223646000 |
| 1  | 7.882228000  | 0.678872000  | 1.303718000  |



**10be**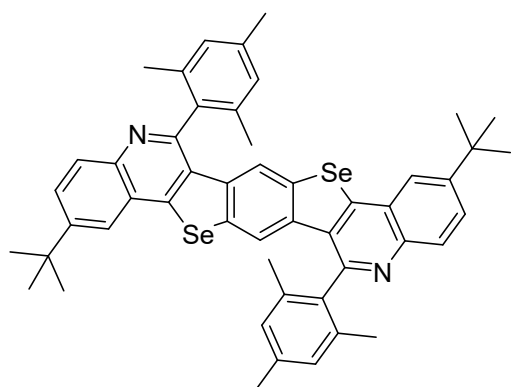

xyz

0 1

|    |              |             |              |
|----|--------------|-------------|--------------|
| 6  | -1.454837000 | 4.431861000 | 0.233412000  |
| 6  | -1.484985000 | 3.034008000 | 0.516226000  |
| 6  | -0.216354000 | 5.036853000 | 0.111362000  |
| 6  | -0.331759000 | 2.296754000 | 0.665790000  |
| 6  | 0.943417000  | 2.907321000 | 0.542470000  |
| 6  | 0.991443000  | 4.306569000 | 0.259165000  |
| 7  | 2.061669000  | 2.144395000 | 0.696770000  |
| 6  | 3.252211000  | 2.692341000 | 0.585724000  |
| 6  | 3.439535000  | 4.090028000 | 0.302709000  |
| 6  | 2.287495000  | 4.871766000 | 0.144198000  |
| 1  | -0.143706000 | 6.102980000 | -0.104170000 |
| 1  | -2.448002000 | 2.529957000 | 0.617761000  |
| 1  | -0.358186000 | 1.227349000 | 0.882188000  |
| 6  | 4.690745000  | 4.832589000 | 0.151293000  |
| 6  | 4.498185000  | 6.215221000 | -0.130774000 |
| 34 | 2.660949000  | 6.689527000 | -0.226940000 |
| 6  | 6.014502000  | 4.367572000 | 0.245972000  |
| 6  | 5.546099000  | 7.109956000 | -0.313752000 |
| 6  | 7.062416000  | 5.262308000 | 0.063000000  |
| 6  | 6.869856000  | 6.644943000 | -0.219051000 |
| 1  | 5.339334000  | 8.154773000 | -0.527480000 |
| 1  | 6.221269000  | 3.322749000 | 0.459670000  |

|    |              |              |              |
|----|--------------|--------------|--------------|
| 34 | 8.899650000  | 4.787980000  | 0.159070000  |
| 6  | 9.273107000  | 6.605774000  | -0.211898000 |
| 6  | 8.121068000  | 7.387509000  | -0.370439000 |
| 6  | 8.308397000  | 8.785224000  | -0.653322000 |
| 6  | 10.569161000 | 7.170990000  | -0.326754000 |
| 6  | 10.617191000 | 8.570255000  | -0.609969000 |
| 7  | 9.498941000  | 9.333188000  | -0.764249000 |
| 6  | 11.892369000 | 9.180832000  | -0.733219000 |
| 6  | 11.776955000 | 6.440702000  | -0.178947000 |
| 6  | 13.015440000 | 7.045706000  | -0.300916000 |
| 6  | 13.045592000 | 8.443574000  | -0.583654000 |
| 1  | 14.008611000 | 8.947634000  | -0.685129000 |
| 1  | 11.918800000 | 10.250250000 | -0.949556000 |
| 1  | 11.704302000 | 5.374563000  | 0.036520000  |
| 6  | 7.129108000  | 9.686265000  | -0.835079000 |
| 6  | -2.775521000 | 5.196934000  | 0.077487000  |
| 6  | -2.549956000 | 6.686735000  | -0.221207000 |
| 1  | -1.997195000 | 7.186440000  | 0.589129000  |
| 1  | -3.520058000 | 7.196390000  | -0.325158000 |
| 1  | -1.994291000 | 6.835430000  | -1.159811000 |
| 6  | -3.586957000 | 5.080643000  | 1.385419000  |
| 1  | -3.029457000 | 5.511520000  | 2.231604000  |
| 1  | -3.818250000 | 4.034033000  | 1.633211000  |
| 1  | -4.542509000 | 5.621472000  | 1.292308000  |
| 6  | -3.581752000 | 4.583994000  | -1.087455000 |
| 1  | -3.020388000 | 4.655328000  | -2.032056000 |
| 1  | -4.537331000 | 5.117897000  | -1.214233000 |
| 1  | -3.812638000 | 3.522589000  | -0.912981000 |
| 6  | 14.336120000 | 6.280629000  | -0.144981000 |
| 6  | 14.110548000 | 4.790811000  | 0.153618000  |
| 1  | 13.554843000 | 4.642059000  | 1.092190000  |
| 1  | 15.080648000 | 4.281154000  | 0.257582000  |

|   |              |              |              |
|---|--------------|--------------|--------------|
| 1 | 13.557825000 | 4.291148000  | -0.656770000 |
| 6 | 15.142301000 | 6.893504000  | 1.020029000  |
| 1 | 14.580898000 | 6.822114000  | 1.964603000  |
| 1 | 15.373195000 | 7.954918000  | 0.845626000  |
| 1 | 16.097875000 | 6.359594000  | 1.146817000  |
| 6 | 15.147608000 | 6.396998000  | -1.452874000 |
| 1 | 14.590144000 | 5.966166000  | -2.299105000 |
| 1 | 16.103159000 | 5.856169000  | -1.359755000 |
| 1 | 15.378905000 | 7.443623000  | -1.700597000 |
| 6 | 6.561111000  | 10.322440000 | 0.285909000  |
| 6 | 6.566288000  | 9.844766000  | -2.113150000 |
| 6 | 5.410635000  | 11.097053000 | 0.109003000  |
| 6 | 4.816173000  | 11.257297000 | -1.150912000 |
| 6 | 5.413318000  | 10.629425000 | -2.249640000 |
| 6 | 7.174090000  | 10.137889000 | 1.650287000  |
| 1 | 6.635636000  | 10.716884000 | 2.413980000  |
| 1 | 8.229246000  | 10.452295000 | 1.651163000  |
| 1 | 7.158876000  | 9.077389000  | 1.951729000  |
| 6 | 7.180968000  | 9.153865000  | -3.303240000 |
| 1 | 6.640690000  | 9.393845000  | -4.229990000 |
| 1 | 7.171156000  | 8.058677000  | -3.175739000 |
| 1 | 8.234642000  | 9.448877000  | -3.425681000 |
| 6 | 3.572056000  | 12.095037000 | -1.307726000 |
| 1 | 3.190155000  | 12.063105000 | -2.338517000 |
| 1 | 3.768421000  | 13.150257000 | -1.053857000 |
| 1 | 2.769201000  | 11.747938000 | -0.636778000 |
| 1 | 4.968044000  | 10.747902000 | -3.241572000 |
| 1 | 4.962174000  | 11.585560000 | 0.979262000  |
| 6 | 4.431511000  | 1.791342000  | 0.767623000  |
| 6 | 4.994692000  | 1.633495000  | 2.045615000  |
| 6 | 4.999180000  | 1.154578000  | -0.353198000 |
| 6 | 6.147687000  | 0.848887000  | 2.182182000  |

|   |             |              |              |
|---|-------------|--------------|--------------|
| 6 | 6.744510000 | 0.220436000  | 1.083610000  |
| 6 | 6.149693000 | 0.380037000  | -0.176219000 |
| 1 | 6.597900000 | -0.108926000 | -1.046353000 |
| 1 | 6.593237000 | 0.730910000  | 3.174050000  |
| 6 | 4.380408000 | 2.325079000  | 3.235514000  |
| 1 | 3.326604000 | 2.030617000  | 3.358136000  |
| 1 | 4.390758000 | 3.420222000  | 3.107642000  |
| 1 | 4.920639000 | 2.085158000  | 4.162307000  |
| 6 | 4.385799000 | 1.338424000  | -1.717490000 |
| 1 | 3.330697000 | 1.023834000  | -1.717927000 |
| 1 | 4.924144000 | 0.759189000  | -2.481078000 |
| 1 | 4.400732000 | 2.398795000  | -2.019397000 |
| 6 | 7.988660000 | -0.617240000 | 1.240505000  |
| 1 | 8.370844000 | -0.584792000 | 2.271174000  |
| 1 | 8.791335000 | -0.270488000 | 0.569162000  |
| 1 | 7.792214000 | -1.672586000 | 0.987222000  |

**10ca**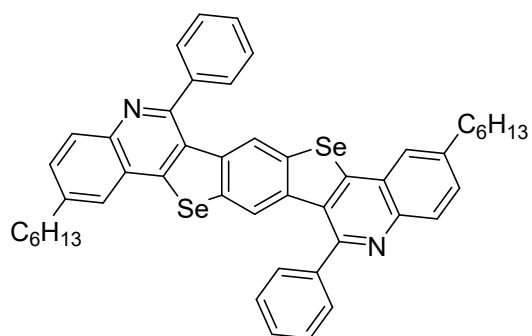

xyz

0 1

|    |              |             |              |
|----|--------------|-------------|--------------|
| 6  | -1.066759000 | 4.944837000 | -0.406386000 |
| 6  | -1.065897000 | 3.522971000 | -0.348077000 |
| 6  | 0.147676000  | 5.604359000 | -0.479682000 |
| 6  | 0.109955000  | 2.804677000 | -0.353143000 |
| 6  | 1.363916000  | 3.467245000 | -0.423005000 |
| 6  | 1.374894000  | 4.895636000 | -0.497857000 |
| 7  | 2.504479000  | 2.727766000 | -0.379869000 |
| 6  | 3.682204000  | 3.311880000 | -0.446037000 |
| 6  | 3.827817000  | 4.731214000 | -0.655048000 |
| 6  | 2.654056000  | 5.497280000 | -0.623868000 |
| 1  | 0.162681000  | 6.697020000 | -0.532544000 |
| 1  | -2.022714000 | 2.996865000 | -0.288265000 |
| 1  | 0.120671000  | 1.715117000 | -0.292066000 |
| 6  | 5.034188000  | 5.511889000 | -0.938329000 |
| 6  | 4.796213000  | 6.912946000 | -1.032186000 |
| 34 | 2.961525000  | 7.353554000 | -0.821047000 |
| 6  | 6.347174000  | 5.065385000 | -1.164864000 |
| 6  | 5.795680000  | 7.840553000 | -1.303186000 |
| 6  | 7.346734000  | 5.993025000 | -1.436028000 |
| 6  | 7.108622000  | 7.394076000 | -1.530157000 |
| 1  | 5.557168000  | 8.899957000 | -1.343695000 |
| 1  | 6.585646000  | 4.005951000 | -1.123876000 |

|    |              |              |              |
|----|--------------|--------------|--------------|
| 34 | 9.181614000  | 5.553659000  | -1.647123000 |
| 6  | 9.488009000  | 7.409911000  | -1.845332000 |
| 6  | 8.314563000  | 8.174799000  | -1.814082000 |
| 6  | 8.458328000  | 9.595726000  | -2.023265000 |
| 6  | 10.767945000 | 8.013301000  | -1.972429000 |
| 6  | 10.776461000 | 9.442571000  | -2.046943000 |
| 7  | 9.634074000  | 10.181409000 | -2.089294000 |
| 6  | 12.028238000 | 10.101908000 | -2.115239000 |
| 6  | 11.994109000 | 7.309277000  | -1.990471000 |
| 6  | 13.213850000 | 7.966387000  | -2.062764000 |
| 6  | 13.208906000 | 9.385825000  | -2.121319000 |
| 1  | 14.154260000 | 9.926351000  | -2.177471000 |
| 1  | 12.019662000 | 11.191764000 | -2.171958000 |
| 1  | 11.978396000 | 6.216236000  | -1.936699000 |
| 6  | 4.851690000  | 2.409791000  | -0.239658000 |
| 6  | 4.990817000  | 1.249195000  | -1.013751000 |
| 6  | 5.785209000  | 2.669137000  | 0.776246000  |
| 6  | 6.065024000  | 0.382769000  | -0.801398000 |
| 6  | 6.999219000  | 0.655053000  | 0.202547000  |
| 6  | 6.851478000  | 1.796220000  | 0.997371000  |
| 6  | 7.286718000  | 10.495079000 | -2.230086000 |
| 6  | 6.355035000  | 10.234212000 | -3.247293000 |
| 6  | 7.143447000  | 11.654353000 | -1.454816000 |
| 6  | 5.286507000  | 11.104315000 | -3.468577000 |
| 6  | 5.134612000  | 12.244121000 | -2.672570000 |
| 6  | 6.066956000  | 12.517932000 | -1.667326000 |
| 6  | 14.495423000 | 7.154577000  | -2.071290000 |
| 6  | -2.371231000 | 5.700524000  | -0.445547000 |
| 6  | -3.003186000 | 5.714571000  | -1.848327000 |
| 1  | -2.203391000 | 6.732632000  | -0.101069000 |
| 1  | -3.084864000 | 5.244175000  | 0.262692000  |
| 6  | -4.361189000 | 6.418940000  | -1.920759000 |

|   |              |              |              |
|---|--------------|--------------|--------------|
| 1 | -3.113646000 | 4.672931000  | -2.194875000 |
| 1 | -2.296967000 | 6.192286000  | -2.550481000 |
| 6 | -4.320901000 | 7.920157000  | -1.626808000 |
| 1 | -5.064430000 | 5.929360000  | -1.221732000 |
| 1 | -4.784734000 | 6.265952000  | -2.929087000 |
| 6 | -5.677514000 | 8.609178000  | -1.785771000 |
| 1 | -3.585317000 | 8.401959000  | -2.297928000 |
| 1 | -3.951144000 | 8.095324000  | -0.600867000 |
| 6 | -5.634368000 | 10.107110000 | -1.488562000 |
| 1 | -6.411312000 | 8.119580000  | -1.120156000 |
| 1 | -6.049182000 | 8.444654000  | -2.813325000 |
| 1 | -5.299612000 | 10.299322000 | -0.455436000 |
| 1 | -6.624002000 | 10.574996000 | -1.610771000 |
| 1 | -4.933575000 | 10.627301000 | -2.162777000 |
| 6 | 15.804242000 | 7.932971000  | -2.186745000 |
| 1 | 14.438374000 | 6.425749000  | -2.899683000 |
| 1 | 14.524113000 | 6.542406000  | -1.151653000 |
| 6 | 17.034303000 | 7.024796000  | -2.196909000 |
| 1 | 15.889089000 | 8.647171000  | -1.348736000 |
| 1 | 15.795717000 | 8.542614000  | -3.107569000 |
| 6 | 18.355541000 | 7.785537000  | -2.306881000 |
| 1 | 16.953196000 | 6.308999000  | -3.035559000 |
| 1 | 17.041833000 | 6.409399000  | -1.278457000 |
| 6 | 19.588581000 | 6.880433000  | -2.317963000 |
| 1 | 18.435773000 | 8.501179000  | -1.467684000 |
| 1 | 18.346893000 | 8.401764000  | -3.225027000 |
| 6 | 20.903954000 | 7.649917000  | -2.426718000 |
| 1 | 19.505580000 | 6.166365000  | -3.157249000 |
| 1 | 19.593469000 | 6.264594000  | -1.400406000 |
| 1 | 20.940756000 | 8.247789000  | -3.352689000 |
| 1 | 21.772467000 | 6.972527000  | -2.432317000 |
| 1 | 21.029336000 | 8.346638000  | -1.581086000 |

|   |             |              |              |
|---|-------------|--------------|--------------|
| 1 | 5.673081000 | 3.563565000  | 1.392996000  |
| 1 | 7.568850000 | 2.006615000  | 1.794183000  |
| 1 | 7.837717000 | -0.025069000 | 0.370680000  |
| 1 | 6.171186000 | -0.512202000 | -1.419270000 |
| 1 | 4.245458000 | 1.035619000  | -1.781969000 |
| 1 | 6.470206000 | 9.340638000  | -3.864727000 |
| 1 | 4.570512000 | 10.892705000 | -4.266310000 |
| 1 | 4.294271000 | 12.921962000 | -2.840729000 |
| 1 | 5.957509000 | 13.411836000 | -1.048483000 |
| 1 | 7.887286000 | 11.869085000 | -0.685445000 |



**10cb**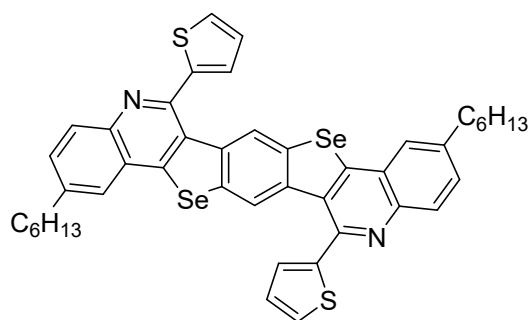

xyz

0 1

|    |              |             |              |
|----|--------------|-------------|--------------|
| 6  | -0.430165000 | 5.184399000 | 0.508462000  |
| 6  | -0.329246000 | 3.848720000 | 0.989293000  |
| 6  | 0.634989000  | 5.714824000 | -0.198848000 |
| 6  | 0.793310000  | 3.084175000 | 0.757829000  |
| 6  | 1.890813000  | 3.612030000 | 0.026710000  |
| 6  | 1.808285000  | 4.960047000 | -0.445495000 |
| 7  | 2.956047000  | 2.813058000 | -0.234301000 |
| 6  | 3.999023000  | 3.274206000 | -0.898504000 |
| 6  | 4.111148000  | 4.663502000 | -1.277910000 |
| 6  | 2.967832000  | 5.455081000 | -1.097603000 |
| 1  | 0.576492000  | 6.744343000 | -0.564303000 |
| 1  | -1.165544000 | 3.426787000 | 1.553551000  |
| 1  | 0.875583000  | 2.056655000 | 1.116061000  |
| 6  | 5.262306000  | 5.405760000 | -1.795907000 |
| 6  | 4.962175000  | 6.754234000 | -2.143759000 |
| 34 | 3.168430000  | 7.223776000 | -1.738737000 |
| 6  | 6.606055000  | 5.005122000 | -1.885080000 |
| 6  | 5.905016000  | 7.634479000 | -2.661796000 |
| 6  | 7.552629000  | 5.891643000 | -2.385384000 |
| 6  | 7.229804000  | 7.202182000 | -2.841208000 |
| 1  | 5.625366000  | 8.657727000 | -2.900795000 |
| 1  | 6.907747000  | 4.018918000 | -1.540469000 |
| 34 | 9.415960000  | 5.538711000 | -2.459820000 |

|    |              |              |              |
|----|--------------|--------------|--------------|
| 6  | 9.608339000  | 7.293694000  | -3.140074000 |
| 6  | 8.386256000  | 7.953749000  | -3.333355000 |
| 6  | 8.450338000  | 9.263435000  | -3.939531000 |
| 6  | 10.852254000 | 7.931144000  | -3.387945000 |
| 6  | 10.774748000 | 9.288938000  | -3.832194000 |
| 7  | 9.595127000  | 9.895204000  | -4.118355000 |
| 6  | 11.985069000 | 10.006904000 | -4.025056000 |
| 6  | 12.121542000 | 7.336987000  | -3.179731000 |
| 6  | 13.293025000 | 8.047559000  | -3.377519000 |
| 6  | 13.202973000 | 9.403102000  | -3.801246000 |
| 1  | 14.125681000 | 9.968215000  | -3.959736000 |
| 1  | 11.907252000 | 11.040236000 | -4.367183000 |
| 1  | 12.174918000 | 6.297176000  | -2.843886000 |
| 6  | 5.000751000  | 2.259042000  | -1.267614000 |
| 6  | 5.687747000  | 2.086059000  | -2.453044000 |
| 16 | 5.321722000  | 0.944384000  | -0.168462000 |
| 6  | 6.492998000  | 0.911756000  | -2.465139000 |
| 6  | 6.405070000  | 0.204034000  | -1.289175000 |
| 6  | 7.263928000  | 9.969368000  | -4.453458000 |
| 6  | 6.177162000  | 9.481085000  | -5.151829000 |
| 16 | 7.203739000  | 11.708936000 | -4.351861000 |
| 6  | 5.283650000  | 10.503764000 | -5.579990000 |
| 6  | 5.704578000  | 11.758193000 | -5.204804000 |
| 6  | 14.640678000 | 7.433352000  | -3.093919000 |
| 6  | -1.695700000 | 5.974694000  | 0.726669000  |
| 6  | -2.795956000 | 5.618190000  | -0.288109000 |
| 1  | -1.467253000 | 7.050043000  | 0.666768000  |
| 1  | -2.076735000 | 5.789871000  | 1.746307000  |
| 6  | -4.119972000 | 6.355519000  | -0.067137000 |
| 1  | -2.972921000 | 4.529914000  | -0.247709000 |
| 1  | -2.419438000 | 5.824540000  | -1.305775000 |
| 6  | -4.048835000 | 7.871903000  | -0.260350000 |

|   |              |              |              |
|---|--------------|--------------|--------------|
| 1 | -4.496272000 | 6.134856000  | 0.949016000  |
| 1 | -4.873006000 | 5.943986000  | -0.762164000 |
| 6 | -5.403692000 | 8.568548000  | -0.120781000 |
| 1 | -3.626195000 | 8.091413000  | -1.258779000 |
| 1 | -3.345159000 | 8.313749000  | 0.467370000  |
| 6 | -5.328122000 | 10.082741000 | -0.309153000 |
| 1 | -5.827195000 | 8.338755000  | 0.873718000  |
| 1 | -6.109690000 | 8.137528000  | -0.853482000 |
| 1 | -4.656825000 | 10.544278000 | 0.434283000  |
| 1 | -6.317251000 | 10.555841000 | -0.204188000 |
| 1 | -4.938744000 | 10.341254000 | -1.308070000 |
| 6 | 15.191445000 | 7.820421000  | -1.712330000 |
| 1 | 15.360561000 | 7.749198000  | -3.868870000 |
| 1 | 14.570178000 | 6.335184000  | -3.161752000 |
| 6 | 16.567335000 | 7.223825000  | -1.418757000 |
| 1 | 14.471799000 | 7.499648000  | -0.938631000 |
| 1 | 15.240760000 | 8.921265000  | -1.637140000 |
| 6 | 17.115363000 | 7.601462000  | -0.042465000 |
| 1 | 17.280418000 | 7.548355000  | -2.198953000 |
| 1 | 16.513842000 | 6.122611000  | -1.502064000 |
| 6 | 18.492988000 | 7.007730000  | 0.256855000  |
| 1 | 16.400808000 | 7.276892000  | 0.736426000  |
| 1 | 17.166807000 | 8.702946000  | 0.040257000  |
| 6 | 19.031137000 | 7.390839000  | 1.634462000  |
| 1 | 19.204611000 | 7.333135000  | -0.523489000 |
| 1 | 18.438812000 | 5.907217000  | 0.172353000  |
| 1 | 19.128529000 | 8.484800000  | 1.734403000  |
| 1 | 20.022760000 | 6.949224000  | 1.821315000  |
| 1 | 18.356051000 | 7.047086000  | 2.435890000  |
| 1 | 5.213455000  | 12.711788000 | -5.393334000 |
| 1 | 4.371018000  | 10.317482000 | -6.147622000 |
| 1 | 6.036786000  | 8.421209000  | -5.362913000 |

|   |             |              |              |
|---|-------------|--------------|--------------|
| 1 | 5.601919000 | 2.775364000  | -3.292749000 |
| 1 | 6.916062000 | -0.721120000 | -1.026383000 |
| 1 | 7.106387000 | 0.601836000  | -3.312197000 |

10cc

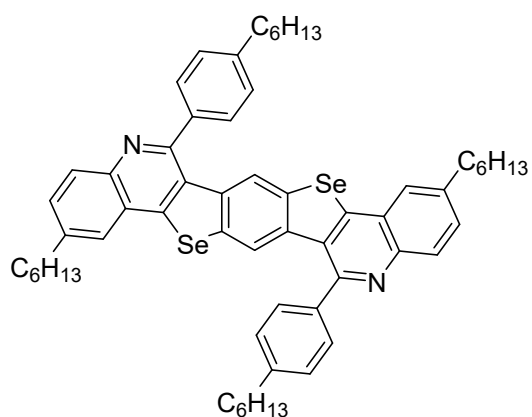

xyz

0 1

|    |              |             |              |
|----|--------------|-------------|--------------|
| 6  | -1.118369000 | 5.629407000 | -0.353306000 |
| 6  | -1.213044000 | 4.230960000 | -0.121885000 |
| 6  | 0.136300000  | 6.181336000 | -0.553069000 |
| 6  | -0.088577000 | 3.431172000 | -0.079349000 |
| 6  | 1.203546000  | 3.983354000 | -0.272361000 |
| 6  | 1.308076000  | 5.389590000 | -0.518960000 |
| 7  | 2.290953000  | 3.161252000 | -0.230692000 |
| 6  | 3.495919000  | 3.659108000 | -0.390255000 |
| 6  | 3.743954000  | 5.066838000 | -0.574952000 |
| 6  | 2.622977000  | 5.898417000 | -0.678741000 |
| 1  | 0.228861000  | 7.258253000 | -0.724305000 |
| 1  | -2.200328000 | 3.787505000 | 0.032961000  |
| 1  | -0.153591000 | 2.357229000 | 0.103571000  |
| 6  | 5.022376000  | 5.778260000 | -0.650526000 |
| 6  | 4.875158000  | 7.172297000 | -0.896835000 |
| 34 | 3.056248000  | 7.708356000 | -1.014089000 |
| 6  | 6.329570000  | 5.293344000 | -0.458718000 |
| 6  | 5.947169000  | 8.050441000 | -0.988470000 |
| 6  | 7.402255000  | 6.175100000 | -0.535800000 |
| 6  | 7.253918000  | 7.565515000 | -0.805677000 |
| 1  | 5.761323000  | 9.101828000 | -1.176653000 |

|    |              |              |              |
|----|--------------|--------------|--------------|
| 1  | 6.506766000  | 4.246166000  | -0.232313000 |
| 34 | 9.219054000  | 5.677125000  | -0.270726000 |
| 6  | 9.643506000  | 7.503237000  | -0.546209000 |
| 6  | 8.521592000  | 8.298313000  | -0.812759000 |
| 6  | 8.752162000  | 9.702677000  | -1.039501000 |
| 6  | 10.946533000 | 8.063328000  | -0.486631000 |
| 6  | 11.034527000 | 9.473091000  | -0.718212000 |
| 7  | 9.945821000  | 10.246585000 | -0.990706000 |
| 6  | 12.312111000 | 10.088439000 | -0.656832000 |
| 6  | 12.126247000 | 7.328930000  | -0.206603000 |
| 6  | 13.364221000 | 7.945020000  | -0.145365000 |
| 6  | 13.439349000 | 9.346333000  | -0.378689000 |
| 1  | 14.414678000 | 9.838245000  | -0.328718000 |
| 1  | 12.358262000 | 11.164571000 | -0.832328000 |
| 1  | 12.052627000 | 6.252398000  | -0.030367000 |
| 6  | 4.644202000  | 2.707199000  | -0.404665000 |
| 6  | 5.324642000  | 2.452620000  | -1.603699000 |
| 6  | 5.115884000  | 2.126728000  | 0.778084000  |
| 6  | 6.482853000  | 1.678270000  | -1.607697000 |
| 6  | 6.999308000  | 1.144883000  | -0.416400000 |
| 6  | 6.285295000  | 1.363157000  | 0.770619000  |
| 6  | 7.593238000  | 10.589581000 | -1.360297000 |
| 6  | 7.152869000  | 10.714370000 | -2.684684000 |
| 6  | 6.854541000  | 11.202900000 | -0.341838000 |
| 6  | 5.962670000  | 11.380278000 | -2.972707000 |
| 6  | 5.176362000  | 11.935173000 | -1.950004000 |
| 6  | 5.657691000  | 11.861373000 | -0.635174000 |
| 1  | 4.579680000  | 2.306051000  | 1.712458000  |
| 1  | 4.959020000  | 2.896327000  | -2.532586000 |
| 1  | 7.729936000  | 10.249684000 | -3.487362000 |
| 1  | 7.194414000  | 11.119549000 | 0.692918000  |
| 6  | 14.620622000 | 7.151397000  | 0.109472000  |

|   |              |              |              |
|---|--------------|--------------|--------------|
| 6 | -2.347946000 | 6.503255000  | -0.414386000 |
| 6 | -2.711274000 | 6.917484000  | -1.849510000 |
| 1 | 5.072741000  | 12.304249000 | 0.175549000  |
| 1 | 5.620574000  | 11.447145000 | -4.009301000 |
| 1 | 7.012607000  | 1.502864000  | -2.548208000 |
| 1 | 6.661186000  | 0.941603000  | 1.707059000  |
| 6 | 3.811739000  | 12.500692000 | -2.262354000 |
| 6 | 2.791401000  | 11.386021000 | -2.546985000 |
| 1 | 3.872093000  | 13.164635000 | -3.142182000 |
| 1 | 3.459202000  | 13.121802000 | -1.422483000 |
| 6 | 1.388455000  | 11.883671000 | -2.892498000 |
| 1 | 2.742170000  | 10.714420000 | -1.672316000 |
| 1 | 3.171069000  | 10.763304000 | -3.376041000 |
| 6 | 0.458858000  | 10.766554000 | -3.370579000 |
| 1 | 1.457619000  | 12.654921000 | -3.681689000 |
| 1 | 0.946348000  | 12.390697000 | -2.015302000 |
| 6 | -0.963876000 | 11.230816000 | -3.688998000 |
| 1 | 0.421168000  | 9.963389000  | -2.611017000 |
| 1 | 0.898505000  | 10.299666000 | -4.271148000 |
| 6 | -1.813221000 | 10.151516000 | -4.358166000 |
| 1 | -0.917907000 | 12.119678000 | -4.343598000 |
| 1 | -1.453613000 | 11.570483000 | -2.758451000 |
| 1 | -1.393235000 | 9.867126000  | -5.336951000 |
| 1 | -2.848086000 | 10.490424000 | -4.522635000 |
| 1 | -1.856275000 | 9.238338000  | -3.744341000 |
| 6 | 8.336525000  | 0.448230000  | -0.407740000 |
| 6 | 9.497577000  | 1.451217000  | -0.302919000 |
| 1 | 8.456137000  | -0.144313000 | -1.330737000 |
| 1 | 8.388825000  | -0.263115000 | 0.433330000  |
| 6 | 10.876386000 | 0.792536000  | -0.345166000 |
| 1 | 9.389142000  | 2.030230000  | 0.632031000  |
| 1 | 9.400133000  | 2.184328000  | -1.121252000 |

|   |              |              |              |
|---|--------------|--------------|--------------|
| 6 | 12.048598000 | 1.766347000  | -0.189024000 |
| 1 | 10.984585000 | 0.242715000  | -1.298488000 |
| 1 | 10.933258000 | 0.028962000  | 0.450794000  |
| 6 | 12.165335000 | 2.810926000  | -1.302521000 |
| 1 | 12.988503000 | 1.187667000  | -0.144241000 |
| 1 | 11.967544000 | 2.284156000  | 0.784998000  |
| 6 | 13.421257000 | 3.671230000  | -1.183813000 |
| 1 | 11.276972000 | 3.465135000  | -1.299127000 |
| 1 | 12.158580000 | 2.299304000  | -2.282232000 |
| 1 | 13.457336000 | 4.189605000  | -0.211648000 |
| 1 | 13.463035000 | 4.439627000  | -1.970481000 |
| 1 | 14.337220000 | 3.061981000  | -1.260117000 |
| 1 | -2.170294000 | 7.406427000  | 0.191471000  |
| 1 | -3.204059000 | 5.982281000  | 0.045482000  |
| 6 | -3.885850000 | 7.894506000  | -1.952220000 |
| 1 | -2.928122000 | 6.009353000  | -2.437003000 |
| 1 | -1.821689000 | 7.372644000  | -2.319980000 |
| 6 | -3.647514000 | 9.245041000  | -1.270637000 |
| 1 | -4.797675000 | 7.428707000  | -1.535708000 |
| 1 | -4.098963000 | 8.069782000  | -3.021200000 |
| 6 | -4.710023000 | 10.293693000 | -1.602568000 |
| 1 | -2.655791000 | 9.632331000  | -1.566727000 |
| 1 | -3.602789000 | 9.115009000  | -0.175014000 |
| 6 | -4.459069000 | 11.640822000 | -0.927468000 |
| 1 | -5.704457000 | 9.909488000  | -1.311995000 |
| 1 | -4.749252000 | 10.430283000 | -2.698151000 |
| 1 | -4.445476000 | 11.541635000 | 0.170751000  |
| 1 | -5.235493000 | 12.377772000 | -1.186590000 |
| 1 | -3.485723000 | 12.061119000 | -1.231559000 |
| 6 | 15.395974000 | 6.832833000  | -1.178044000 |
| 1 | 14.362492000 | 6.207874000  | 0.616369000  |
| 1 | 15.278500000 | 7.706758000  | 0.800056000  |



|   |              |             |              |
|---|--------------|-------------|--------------|
| 6 | 16.604331000 | 5.927358000 | -0.946143000 |
| 1 | 15.718599000 | 7.775614000 | -1.654232000 |
| 1 | 14.709450000 | 6.354087000 | -1.896351000 |
| 6 | 17.355098000 | 5.571207000 | -2.228885000 |
| 1 | 16.268548000 | 4.997625000 | -0.451585000 |
| 1 | 17.297882000 | 6.412678000 | -0.234927000 |
| 6 | 18.558553000 | 4.654410000 | -2.003607000 |
| 1 | 17.690495000 | 6.499305000 | -2.727726000 |
| 1 | 16.655729000 | 5.087596000 | -2.935792000 |
| 6 | 19.299256000 | 4.298967000 | -3.291632000 |
| 1 | 18.219091000 | 3.729425000 | -1.503123000 |
| 1 | 19.255442000 | 5.138904000 | -1.295953000 |
| 1 | 18.634682000 | 3.782002000 | -4.003917000 |
| 1 | 20.159120000 | 3.638386000 | -3.097902000 |
| 1 | 19.679716000 | 5.203294000 | -3.795267000 |

**11ba**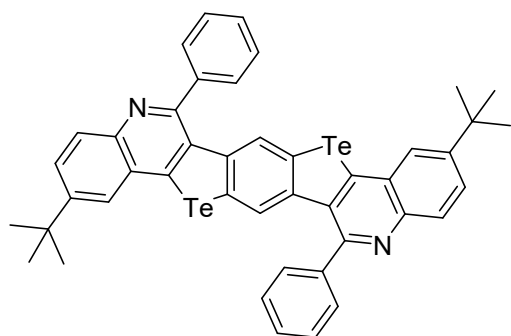

xyz

0 1

|    |              |             |              |
|----|--------------|-------------|--------------|
| 6  | -0.963507000 | 5.008221000 | -0.302424000 |
| 6  | -0.999638000 | 3.586128000 | -0.414897000 |
| 6  | 0.277401000  | 5.618050000 | -0.261111000 |
| 6  | 0.150558000  | 2.832222000 | -0.471319000 |
| 6  | 1.427434000  | 3.451085000 | -0.423155000 |
| 6  | 1.484671000  | 4.874930000 | -0.329818000 |
| 7  | 2.543438000  | 2.677492000 | -0.423162000 |
| 6  | 3.736916000  | 3.231927000 | -0.392134000 |
| 6  | 3.933598000  | 4.662947000 | -0.455382000 |
| 6  | 2.779756000  | 5.452238000 | -0.352650000 |
| 1  | 0.351768000  | 6.703684000 | -0.186681000 |
| 1  | -1.964763000 | 3.077325000 | -0.451861000 |
| 1  | 0.120755000  | 1.743630000 | -0.543631000 |
| 6  | 5.203767000  | 5.382207000 | -0.639746000 |
| 6  | 5.148619000  | 6.800149000 | -0.542038000 |
| 52 | 3.184584000  | 7.519728000 | -0.271008000 |
| 6  | 6.457414000  | 4.821993000 | -0.947382000 |
| 6  | 6.264994000  | 7.613473000 | -0.696545000 |
| 6  | 7.573589000  | 5.635428000 | -1.102829000 |
| 6  | 7.518634000  | 7.053486000 | -1.004995000 |
| 1  | 6.163826000  | 8.688404000 | -0.581803000 |
| 1  | 6.558369000  | 3.746938000 | -1.061836000 |

|    |              |              |              |
|----|--------------|--------------|--------------|
| 52 | 9.536812000  | 4.916752000  | -1.379632000 |
| 6  | 9.940702000  | 6.984060000  | -1.301007000 |
| 6  | 8.788380000  | 7.772503000  | -1.192615000 |
| 6  | 8.984536000  | 9.205678000  | -1.254766000 |
| 6  | 11.237132000 | 7.562492000  | -1.330218000 |
| 6  | 11.294663000 | 8.988136000  | -1.235254000 |
| 7  | 10.176231000 | 9.760970000  | -1.228524000 |
| 6  | 12.568471000 | 9.605508000  | -1.194259000 |
| 6  | 12.442854000 | 6.826611000  | -1.406407000 |
| 6  | 13.688316000 | 7.436785000  | -1.372897000 |
| 6  | 13.724757000 | 8.853975000  | -1.259018000 |
| 1  | 14.683435000 | 9.370129000  | -1.227103000 |
| 1  | 12.598455000 | 10.694083000 | -1.121207000 |
| 1  | 12.376301000 | 5.737974000  | -1.481374000 |
| 6  | 4.867848000  | 2.274401000  | -0.215521000 |
| 6  | 5.023816000  | 1.195315000  | -1.096156000 |
| 6  | 5.751109000  | 2.406125000  | 0.867867000  |
| 6  | 6.070103000  | 0.286562000  | -0.921476000 |
| 6  | 6.957278000  | 0.434373000  | 0.148754000  |
| 6  | 6.788753000  | 1.491332000  | 1.049578000  |
| 6  | 7.851230000  | 10.161736000 | -1.424969000 |
| 6  | 6.966982000  | 10.033439000 | -2.507927000 |
| 6  | 7.693604000  | 11.235545000 | -0.538274000 |
| 6  | 5.926707000  | 10.946474000 | -2.683378000 |
| 6  | 5.756474000  | 11.998016000 | -1.776551000 |
| 6  | 6.644627000  | 12.142412000 | -0.706671000 |
| 1  | 5.626903000  | 3.239179000  | 1.563130000  |
| 1  | 4.316617000  | 1.079920000  | -1.919526000 |
| 1  | 7.092246000  | 9.204258000  | -3.207625000 |
| 1  | 8.401391000  | 11.348242000 | 0.284975000  |
| 1  | 7.468966000  | 1.603364000  | 1.897189000  |
| 1  | 6.191201000  | -0.543335000 | -1.621945000 |

|   |              |              |              |
|---|--------------|--------------|--------------|
| 1 | 6.522140000  | 12.968099000 | -0.001486000 |
| 1 | 5.245608000  | 10.837147000 | -3.530625000 |
| 1 | 7.774499000  | -0.277800000 | 0.286221000  |
| 1 | 4.937079000  | 12.708635000 | -1.909003000 |
| 6 | -2.280625000 | 5.792001000  | -0.237253000 |
| 6 | -3.094668000 | 5.522785000  | -1.520807000 |
| 1 | -4.048104000 | 6.074478000  | -1.492135000 |
| 1 | -3.330205000 | 4.454904000  | -1.640919000 |
| 1 | -2.536771000 | 5.846736000  | -2.413165000 |
| 6 | -2.048633000 | 7.305974000  | -0.119975000 |
| 1 | -1.489744000 | 7.563786000  | 0.792797000  |
| 1 | -3.016457000 | 7.828355000  | -0.075370000 |
| 1 | -1.496816000 | 7.702772000  | -0.986024000 |
| 6 | -3.087118000 | 5.326747000  | 0.993982000  |
| 1 | -3.321153000 | 4.252735000  | 0.949197000  |
| 1 | -4.041054000 | 5.874835000  | 1.056050000  |
| 1 | -2.524498000 | 5.510005000  | 1.922597000  |
| 6 | 14.962491000 | 6.579687000  | -1.452032000 |
| 6 | 14.956500000 | 5.778916000  | -2.771382000 |
| 1 | 14.086738000 | 5.108490000  | -2.838317000 |
| 1 | 15.864455000 | 5.159203000  | -2.848540000 |
| 1 | 14.926844000 | 6.454535000  | -3.640335000 |
| 6 | 14.992555000 | 5.603692000  | -0.256647000 |
| 1 | 14.122745000 | 4.929950000  | -0.258271000 |
| 1 | 14.989867000 | 6.152523000  | 0.697934000  |
| 1 | 15.900553000 | 4.980214000  | -0.292236000 |
| 6 | 16.240207000 | 7.432417000  | -1.411298000 |
| 1 | 16.288898000 | 8.137518000  | -2.255262000 |
| 1 | 17.123755000 | 6.778782000  | -1.473344000 |
| 1 | 16.319010000 | 8.008232000  | -0.476424000 |

## 6.4 Visualization of the Frontier Molecular Orbitals

Table S12. Visualization of the HOMO and LUMO Orbitals of 9-11.

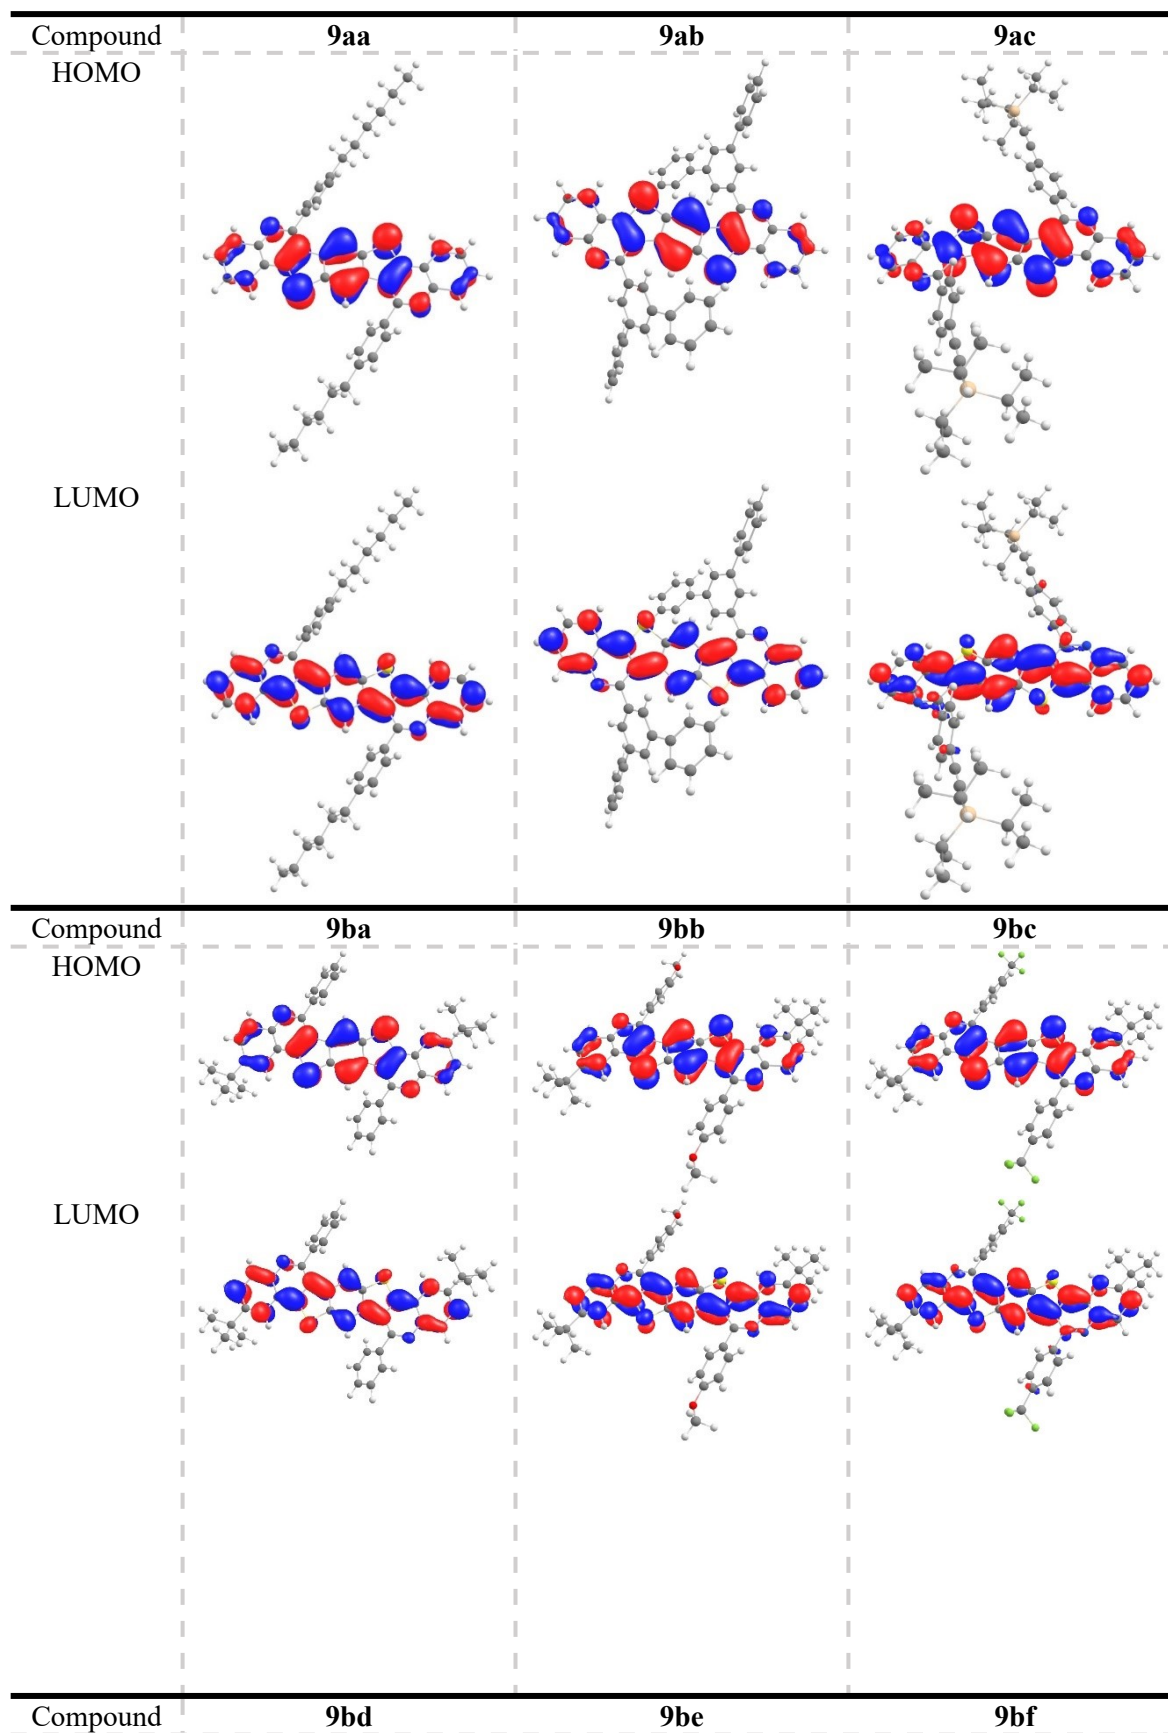

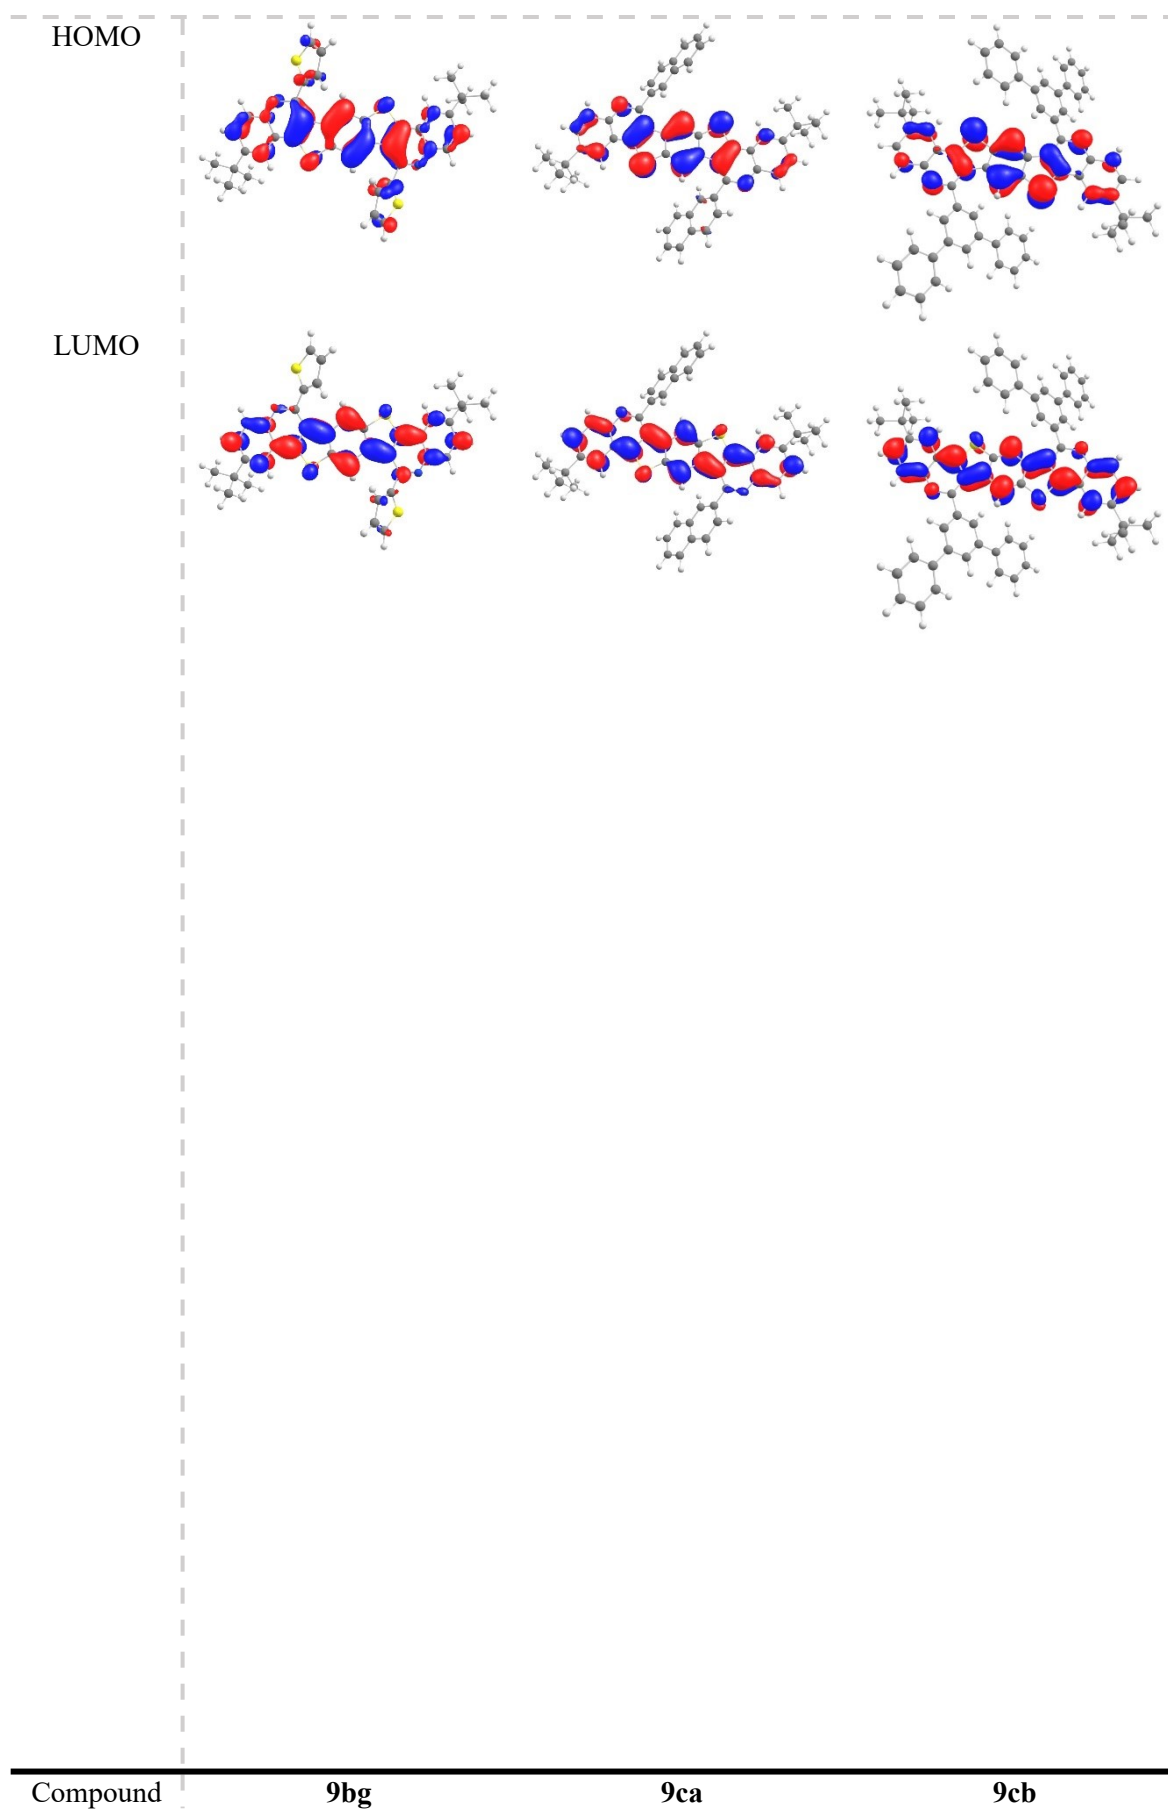

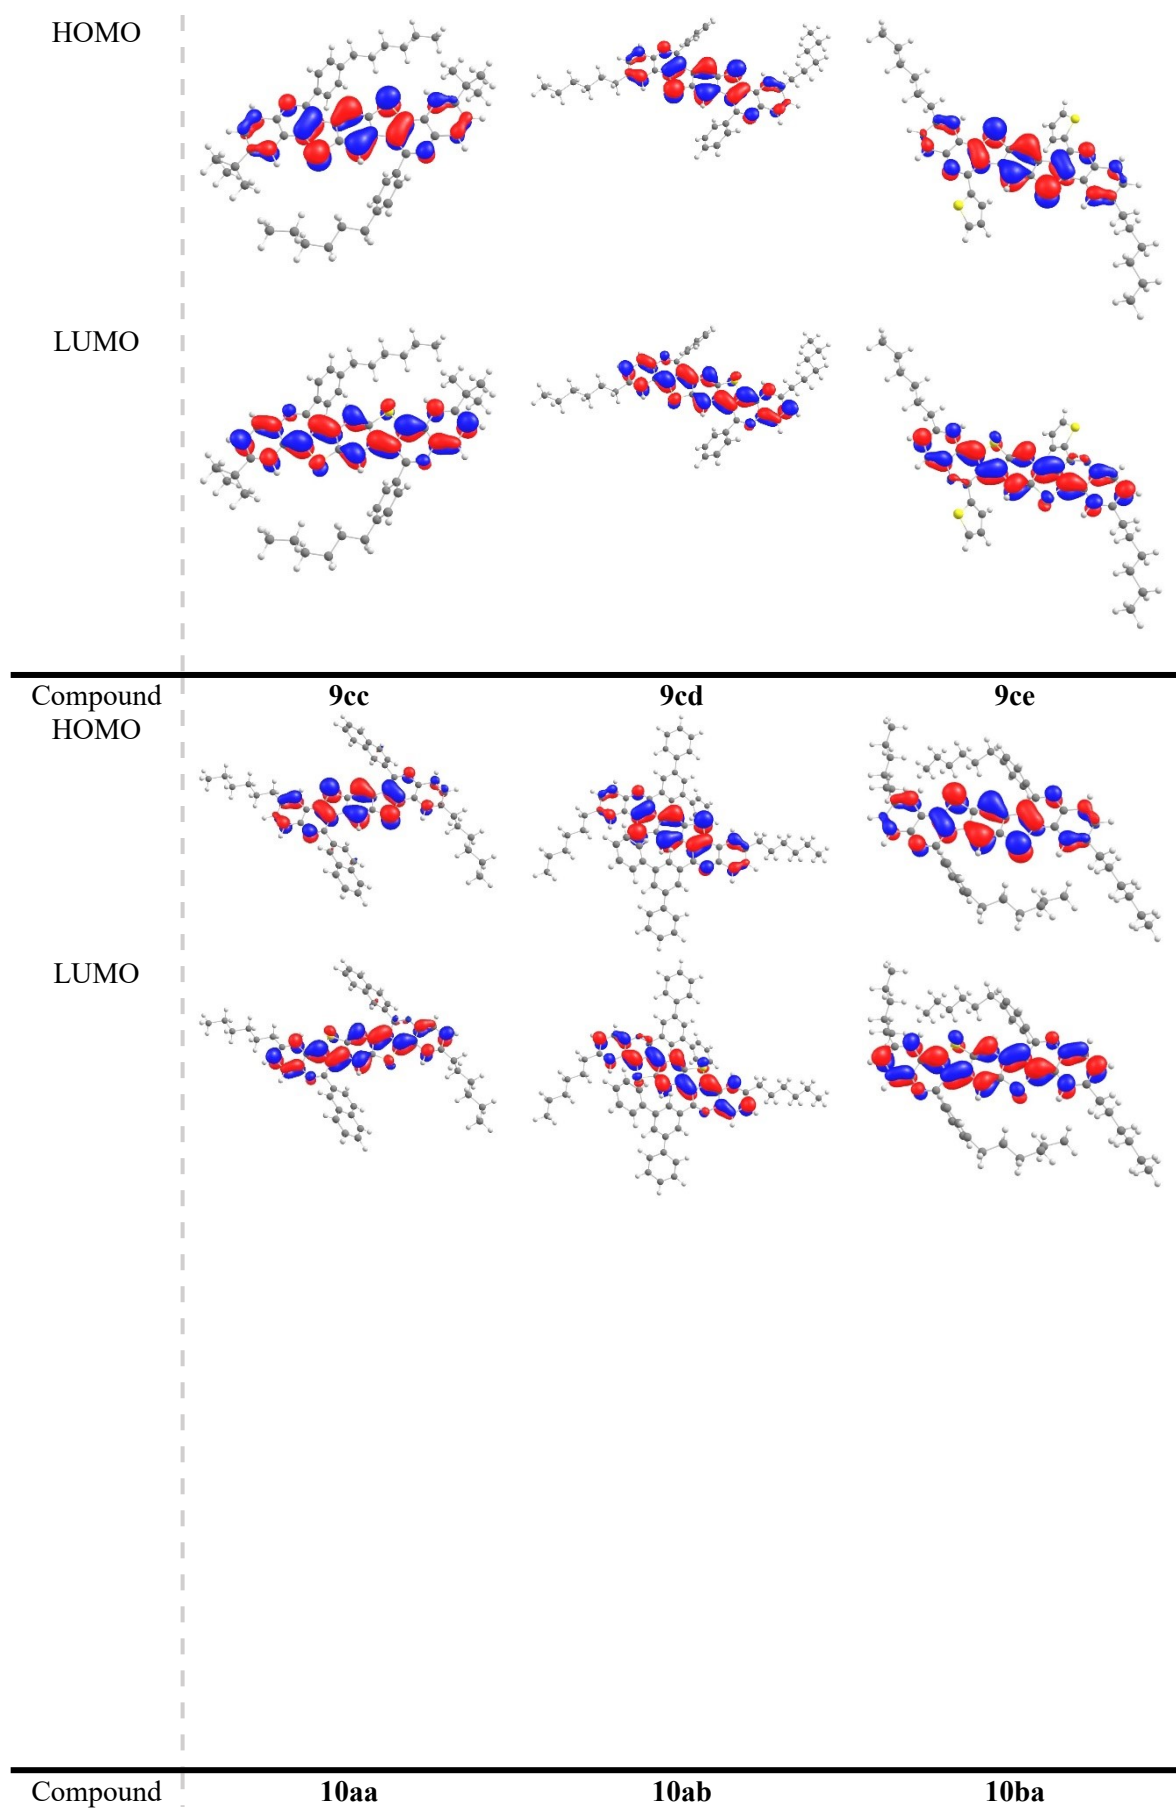

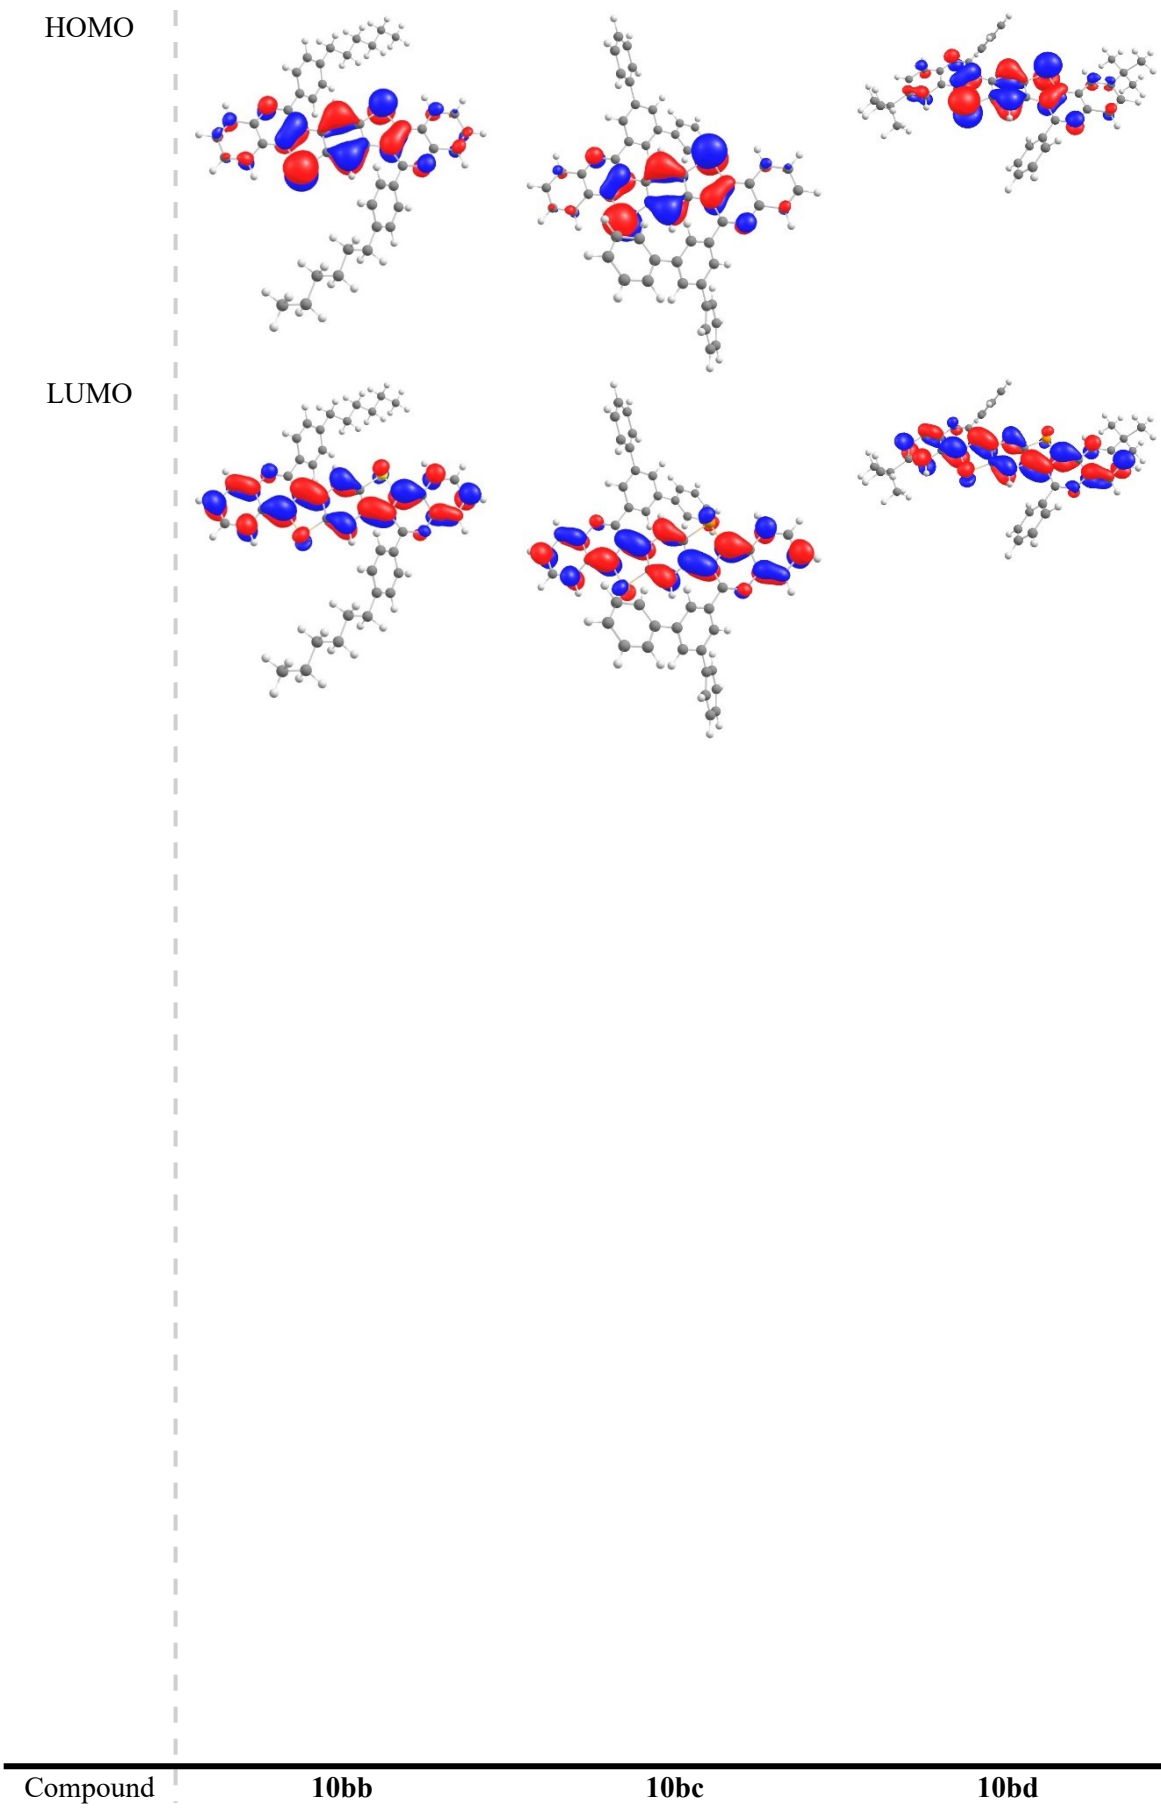



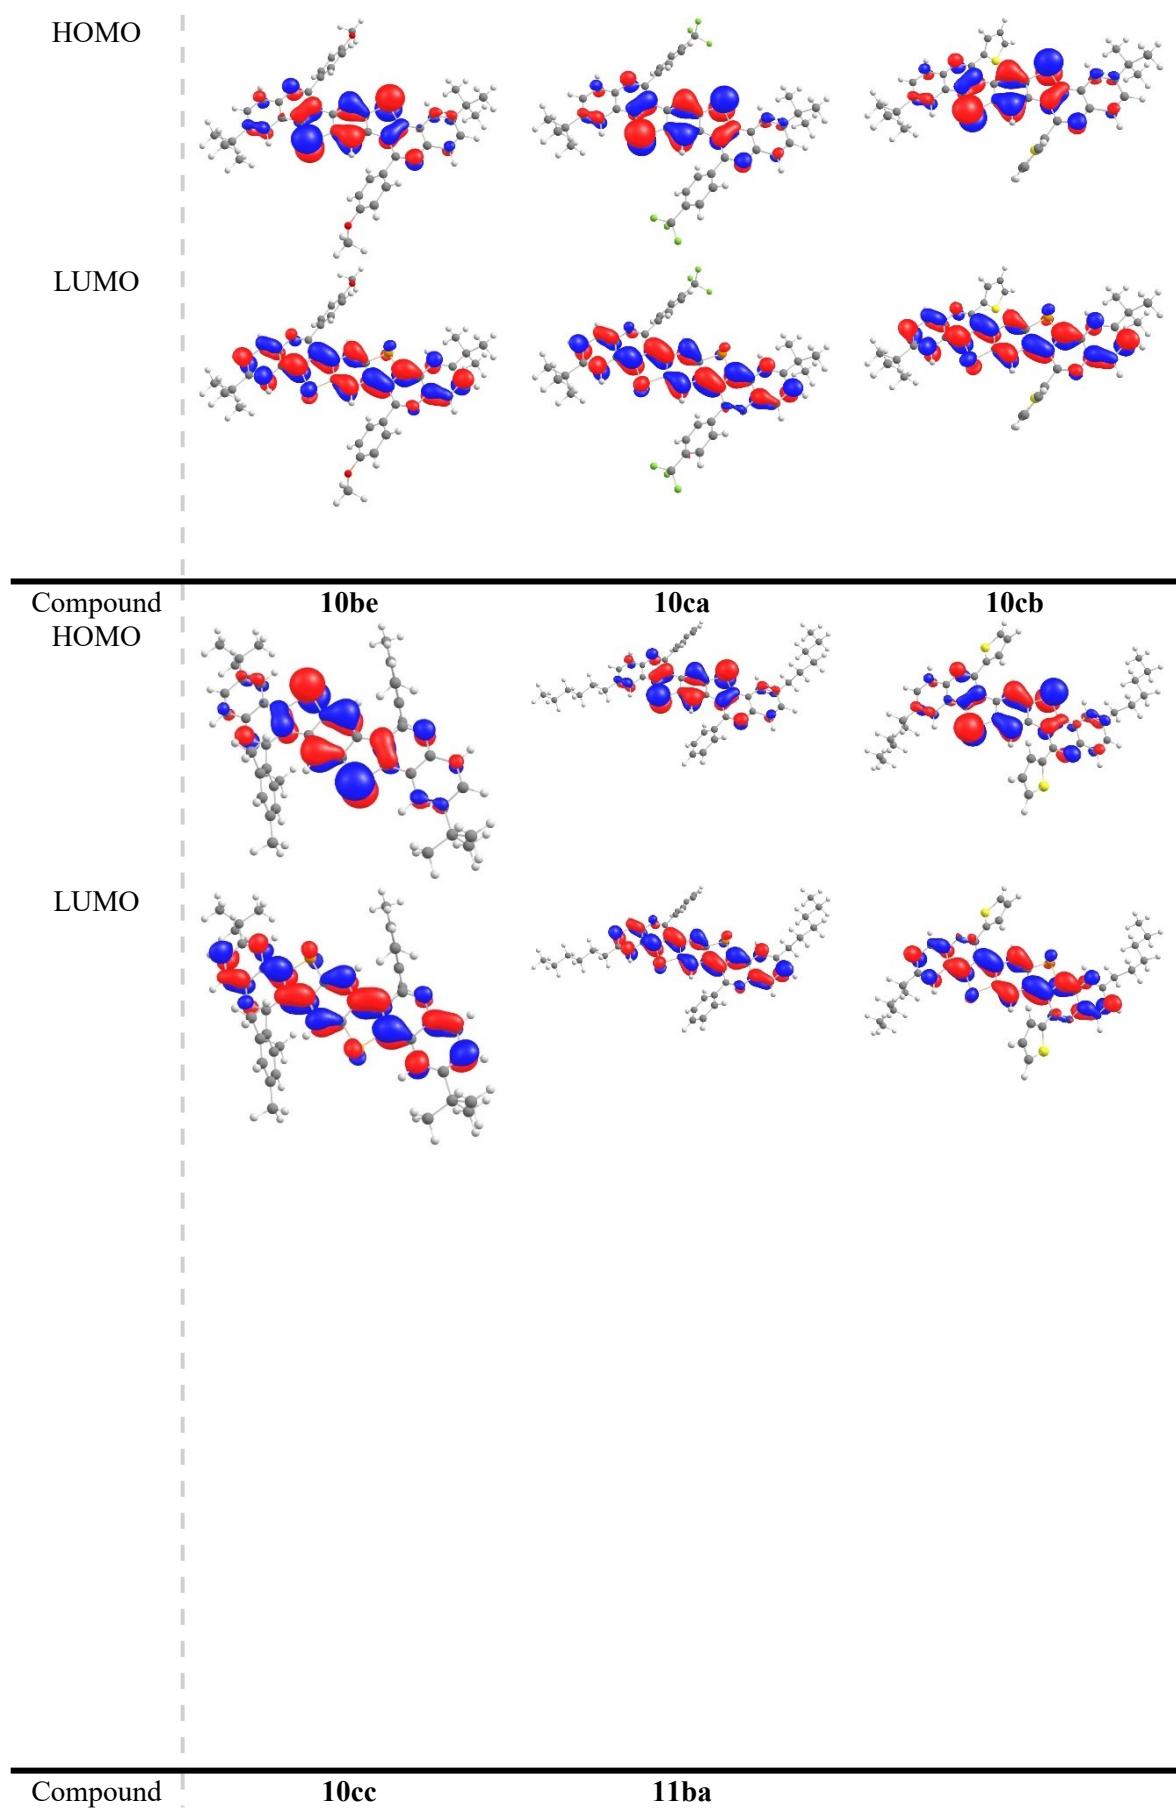

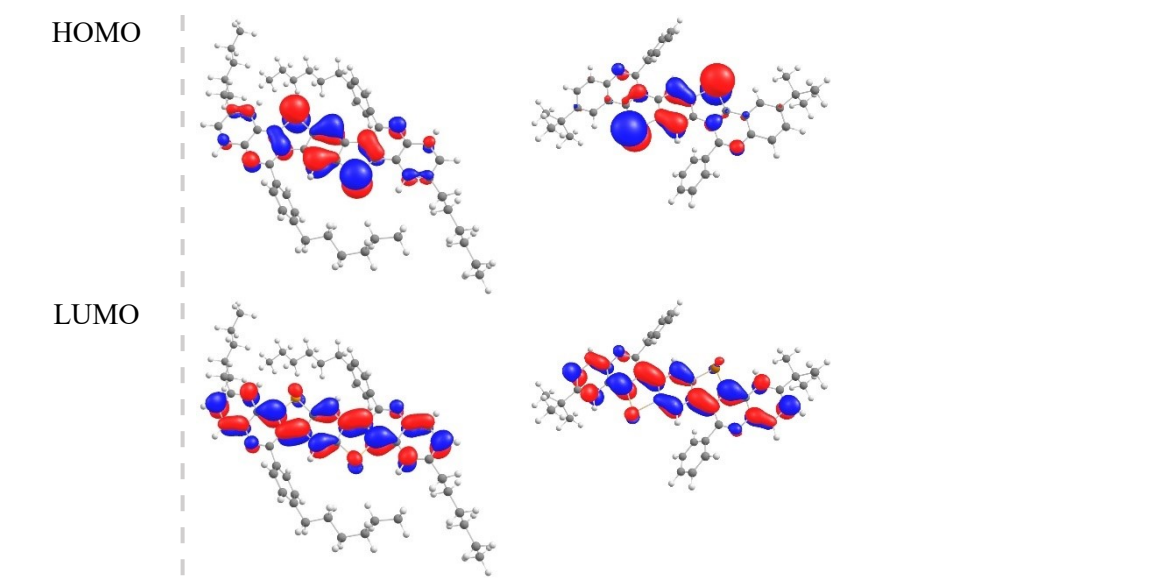

## 7 References

- 1 G. R. Fulmer, A. J. M. Miller, N. H. Sherden, H. E. Gottlieb, A. Nudelman, B. M. Stoltz, J. E. Bercaw and K. I. Goldberg, NMR Chemical Shifts of Trace Impurities: Common Laboratory Solvents, Organics, and Gases in Deuterated Solvents Relevant to the Organometallic Chemist, *Organometallics*, 2010, **29**, 2176–2179.
- 2 A. S. Dillon and B. L. Flynn, Polyynes to Polycycles: Domino Reactions Forming Polyfused Chalcogenophenes, *Org. Lett.*, 2020, **22**, 2987–2990.
- 3 C. Granchi, I. Caligiuri, E. Bertelli, G. Poli, F. Rizzolio, M. Macchia, A. Martinelli, F. Minutolo and T. Tuccinardi, Development of terphenyl-2-methyloxazol-5(4H)-one derivatives as selective reversible MAGL inhibitors, *J. Enzyme Inhib. Med. Chem.*, 2017, **32**, 1240–1252.
- 4 S. Choi, S. H. Chae, M. H. Hoang, K. H. Kim, J. A. Huh, Y. Kim, S.-J. Kim, D. H. Choi and S. J. Lee, An unsymmetrically  $\pi$ -extended porphyrin-based single-crystal field-effect transistor and its anisotropic carrier-transport behavior, *Chem. Eur. J.*, 2013, **19**, 2247–2251.
- 5 C.-Y. Long, S.-F. Ni, M.-H. Su, X.-Q. Wang and W. Tan, Highly Chemoselective Access to 2,2'-Diaminobiaryls via Ni-Catalyzed Protecting-Group-Free Coupling of 2-Haloanilines, *ACS Catal.*, 2020, **10**, 13641–13649.
- 6 R. Heckershoff, T. Schnitzer, T. Diederich, L. Eberle, P. Krämer, F. Rominger, M. Rudolph and A. S. K. Hashmi, Efficient Synthesis of Dipyrrrolobenzenes and Dipyrrrolopyrazines via Bidirectional Gold Catalysis: a Combined Synthetic and Photophysical Study, *J. Am. Chem. Soc.*, 2022, **144**, 8306–8316.
- 7 E. Kumaran, W. Y. Fan and W. K. Leong, Cp\*IrCl<sub>2</sub> catalyzed formation of 2,2'-biindoles from 2-ethynylanilines, *Org. Lett.*, 2014, **16**, 1342–1345.
- 8 F. Neese, Software update: The ORCA program system—Version 5.0, *WIREs Comput. Mol. Sci.*, 2022, **12**, e1606.
- 9 A. D. Becke, Density-functional thermochemistry. III. The role of exact exchange, *J. Chem. Phys.*, 1993, **98**, 5648–5652.
- 10 P. J. Stephens, F. J. Devlin, C. F. Chabalowski and M. J. Frisch, Ab Initio Calculation of Vibrational Absorption and Circular Dichroism Spectra Using Density Functional Force Fields, *J. Phys. Chem.*, 1994, **98**, 11623–11627.
- 11 F. Weigend, Accurate Coulomb-fitting basis sets for H to Rn, *Phys. Chem. Chem. Phys.*, 2006, **8**, 1057–1065.
- 12 F. Weigend and R. Ahlrichs, Balanced basis sets of split valence, triple zeta valence and quadruple zeta valence quality for H to Rn: Design and assessment of accuracy, *Phys. Chem. Chem. Phys.*, 2005, **7**, 3297–3305.
- 13 R. Heckershoff, L. Eberle, N. Richert, C. Delavier, M. Bruckschlegel, M. R. Schäfer, P. Krämer, F. Rominger, M. Rudolph and A. S. K. Hashmi, Versatile access to nitrogen-rich  $\pi$ -extended indolocarbazoles via a Pictet–Spengler approach, *Org. Chem. Front.*, 2022, **10**, 12–21.
